# Supplementary material
Source: PubMed Central journal article supplement (PMC1326320)
Supplement: 4-embor881-s1.pdf [file 4-embor881-s1.pdf]

## Isoleucyl-tRNA synthetase multiple sequence alignment

Note: Sequence abbreviations correspond to the first two letters of the genus and species name in the phylogeny shown in Figure 2 in Brown et al. Stau2 and Baan2 are the putative drug resistant isoleucyl-tRNA synthetases. The mask (\*) denotes those positions included in edited alignment used for phylogenetic analysis.

Irs\_suppl\_ER.msf MSF: 1813 Type: P February 27, 2003 16:16 Check: 7203

..

|             |           |             |              |
|-------------|-----------|-------------|--------------|
| Name: mask  | Len: 1813 | Check: 2384 | Weight: 1.00 |
| Name: stau2 | Len: 1813 | Check: 6707 | Weight: 1.30 |
| Name: bace2 | Len: 1813 | Check: 7437 | Weight: 0.60 |
| Name: baan2 | Len: 1813 | Check: 1291 | Weight: 0.60 |
| Name: ocih  | Len: 1813 | Check: 1091 | Weight: 1.10 |
| Name: clpe  | Len: 1813 | Check: 8608 | Weight: 0.90 |
| Name: clac  | Len: 1813 | Check: 8754 | Weight: 0.90 |
| Name: cldi  | Len: 1813 | Check: 7690 | Weight: 1.30 |
| Name: pogi  | Len: 1813 | Check: 4984 | Weight: 1.00 |
| Name: bafr  | Len: 1813 | Check: 5002 | Weight: 1.00 |
| Name: feac  | Len: 1813 | Check: 189  | Weight: 1.20 |
| Name: thvo  | Len: 1813 | Check: 5823 | Weight: 1.00 |
| Name: thnw  | Len: 1813 | Check: 6567 | Weight: 1.00 |
| Name: cyhu  | Len: 1813 | Check: 9700 | Weight: 1.10 |
| Name: chte  | Len: 1813 | Check: 6345 | Weight: 1.30 |
| Name: dera  | Len: 1813 | Check: 6640 | Weight: 1.50 |
| Name: stco  | Len: 1813 | Check: 1255 | Weight: 1.40 |
| Name: thth  | Len: 1813 | Check: 107  | Weight: 1.10 |
| Name: deet  | Len: 1813 | Check: 3181 | Weight: 1.30 |
| Name: anga  | Len: 1813 | Check: 4052 | Weight: 1.00 |
| Name: drme  | Len: 1813 | Check: 8416 | Weight: 1.00 |
| Name: hosa  | Len: 1813 | Check: 5413 | Weight: 1.10 |
| Name: cael  | Len: 1813 | Check: 9534 | Weight: 1.20 |
| Name: asfu  | Len: 1813 | Check: 9136 | Weight: 1.00 |
| Name: scpo  | Len: 1813 | Check: 227  | Weight: 1.00 |
| Name: sace  | Len: 1813 | Check: 4834 | Weight: 1.10 |
| Name: ledo  | Len: 1813 | Check: 8265 | Weight: 0.70 |
| Name: lema  | Len: 1813 | Check: 1594 | Weight: 0.70 |
| Name: arth  | Len: 1813 | Check: 3634 | Weight: 1.20 |
| Name: teth  | Len: 1813 | Check: 3503 | Weight: 1.30 |
| Name: encu  | Len: 1813 | Check: 5409 | Weight: 1.20 |
| Name: nolo  | Len: 1813 | Check: 2406 | Weight: 1.00 |
| Name: plfa  | Len: 1813 | Check: 8860 | Weight: 1.10 |
| Name: plyo  | Len: 1813 | Check: 5814 | Weight: 1.10 |
| Name: chtr  | Len: 1813 | Check: 5306 | Weight: 0.70 |
| Name: chmu  | Len: 1813 | Check: 2458 | Weight: 0.70 |
| Name: chpn  | Len: 1813 | Check: 8006 | Weight: 0.90 |
| Name: trde  | Len: 1813 | Check: 350  | Weight: 1.00 |
| Name: trpa  | Len: 1813 | Check: 3412 | Weight: 1.20 |

|               |           |             |              |
|---------------|-----------|-------------|--------------|
| Name: bobu    | Len: 1813 | Check: 1384 | Weight: 1.30 |
| Name: myle    | Len: 1813 | Check: 1173 | Weight: 0.80 |
| Name: mytu    | Len: 1813 | Check: 7402 | Weight: 0.80 |
| Name: codi    | Len: 1813 | Check: 4073 | Weight: 1.10 |
| Name: ripr    | Len: 1813 | Check: 554  | Weight: 0.90 |
| Name: rico    | Len: 1813 | Check: 9436 | Weight: 0.80 |
| Name: psfl    | Len: 1813 | Check: 4103 | Weight: 1.50 |
| Name: suso    | Len: 1813 | Check: 4269 | Weight: 1.40 |
| Name: aepe    | Len: 1813 | Check: 6634 | Weight: 1.30 |
| Name: arfu    | Len: 1813 | Check: 1768 | Weight: 1.20 |
| Name: meba    | Len: 1813 | Check: 1271 | Weight: 1.20 |
| Name: meth    | Len: 1813 | Check: 3299 | Weight: 1.20 |
| Name: pyho    | Len: 1813 | Check: 9612 | Weight: 0.50 |
| Name: pyfu    | Len: 1813 | Check: 3061 | Weight: 0.50 |
| Name: pyab    | Len: 1813 | Check: 1473 | Weight: 0.50 |
| Name: meja    | Len: 1813 | Check: 8107 | Weight: 1.30 |
| Name: haNRC   | Len: 1813 | Check: 6695 | Weight: 1.60 |
| Name: pyba    | Len: 1813 | Check: 7863 | Weight: 1.50 |
| Name: bace1   | Len: 1813 | Check: 7645 | Weight: 0.40 |
| Name: baan1   | Len: 1813 | Check: 8519 | Weight: 0.40 |
| Name: bast    | Len: 1813 | Check: 2379 | Weight: 0.70 |
| Name: basu    | Len: 1813 | Check: 9673 | Weight: 0.70 |
| Name: baha    | Len: 1813 | Check: 6685 | Weight: 0.70 |
| Name: limo    | Len: 1813 | Check: 879  | Weight: 0.40 |
| Name: liin    | Len: 1813 | Check: 1347 | Weight: 0.40 |
| Name: stau    | Len: 1813 | Check: 504  | Weight: 1.00 |
| Name: stpy    | Len: 1813 | Check: 1152 | Weight: 0.70 |
| Name: stmu    | Len: 1813 | Check: 2465 | Weight: 0.70 |
| Name: stpn    | Len: 1813 | Check: 5092 | Weight: 0.70 |
| Name: lala    | Len: 1813 | Check: 127  | Weight: 0.90 |
| Name: enfa    | Len: 1813 | Check: 9169 | Weight: 0.80 |
| Name: syne    | Len: 1813 | Check: 2587 | Weight: 1.20 |
| Name: arthchl | Len: 1813 | Check: 35   | Weight: 1.20 |
| Name: prma    | Len: 1813 | Check: 8335 | Weight: 1.20 |
| Name: mypu    | Len: 1813 | Check: 7464 | Weight: 1.40 |
| Name: myge    | Len: 1813 | Check: 8540 | Weight: 1.10 |
| Name: mypn    | Len: 1813 | Check: 656  | Weight: 1.10 |
| Name: urur    | Len: 1813 | Check: 8044 | Weight: 1.40 |
| Name: saty    | Len: 1813 | Check: 8834 | Weight: 0.60 |
| Name: esco    | Len: 1813 | Check: 9083 | Weight: 0.50 |
| Name: yepe    | Len: 1813 | Check: 5767 | Weight: 0.60 |
| Name: vich    | Len: 1813 | Check: 650  | Weight: 0.80 |
| Name: hain    | Len: 1813 | Check: 9154 | Weight: 0.50 |
| Name: acac    | Len: 1813 | Check: 7712 | Weight: 0.50 |
| Name: pamu    | Len: 1813 | Check: 5228 | Weight: 0.60 |
| Name: psae    | Len: 1813 | Check: 6330 | Weight: 0.80 |
| Name: psfl_1  | Len: 1813 | Check: 9893 | Weight: 0.80 |
| Name: xyfa    | Len: 1813 | Check: 5461 | Weight: 1.20 |
| Name: neme    | Len: 1813 | Check: 4995 | Weight: 1.20 |
| Name: buAPS   | Len: 1813 | Check: 7668 | Weight: 1.40 |
| Name: agtu    | Len: 1813 | Check: 9729 | Weight: 0.80 |
| Name: sime    | Len: 1813 | Check: 6418 | Weight: 0.80 |

|                 |           |             |              |
|-----------------|-----------|-------------|--------------|
| Name: melo      | Len: 1813 | Check: 1231 | Weight: 0.90 |
| Name: cacr      | Len: 1813 | Check: 6839 | Weight: 1.20 |
| Name: hepy26695 | Len: 1813 | Check: 4370 | Weight: 0.80 |
| Name: hepyj99   | Len: 1813 | Check: 2827 | Weight: 0.80 |
| Name: caje      | Len: 1813 | Check: 293  | Weight: 1.30 |
| Name: thma      | Len: 1813 | Check: 1590 | Weight: 1.00 |
| Name: fepe      | Len: 1813 | Check: 4716 | Weight: 1.00 |
| Name: aqae      | Len: 1813 | Check: 557  | Weight: 1.30 |

//

|       |            |            |            |            |            |
|-------|------------|------------|------------|------------|------------|
|       | 1          |            |            |            | 50         |
| mask  | .....      | .....      | .....      | .....      | .....      |
| stau2 | .....      | .....      | .....      | .....      | .....      |
| bace2 | .....      | .....      | .....      | .....      | .....      |
| baan2 | .....      | .....      | .....      | .....      | .....      |
| ocih  | .....      | .....      | .....      | .....      | .....      |
| clpe  | .....      | .....      | .....      | .....      | .....      |
| clac  | .....      | .....      | .....      | .....      | .....      |
| cldi  | .....      | .....      | .....      | .....      | .....      |
| pogi  | .....      | .....      | .....      | .....      | .....      |
| bafr  | .....      | .....      | .....      | .....      | .....      |
| feac  | .....      | .....      | .....      | .....      | .....      |
| thvo  | .....      | .....      | .....      | .....      | .....      |
| thnw  | .....      | .....      | .....      | .....      | .....      |
| cyhu  | .....      | .....      | .....      | .....      | .....      |
| chte  | .....      | .....      | .....      | .....      | .....      |
| dera  | .....      | .....      | .....      | .....      | .....      |
| stco  | .....      | .....      | .....      | .....      | .....      |
| thth  | .....      | .....      | .....      | .....      | .....      |
| deet  | .....      | .....      | .....      | .....      | .....      |
| anga  | .....      | .....      | .....      | .....      | .....      |
| drme  | .....      | .....      | .....      | .....      | .....      |
| hosa  | .....      | .....      | .....      | .....      | .....      |
| cael  | .....      | .....      | .....      | .....      | .....      |
| asfu  | .....      | .....      | .....      | .....      | .....      |
| scpo  | .....      | .....      | .....      | .....      | .....      |
| sace  | .....      | .....      | .....      | .....      | .....      |
| ledo  | .....      | .....      | .....      | .....      | .....      |
| lema  | .....      | .....      | .....      | .....      | .....      |
| arth  | .....      | .....      | .....      | .....      | .....      |
| teth  | .....      | .....      | .....      | .....      | .....      |
| encu  | .....      | .....      | .....      | .....      | .....      |
| nolo  | .....      | .....      | .....      | .....      | .....      |
| plfa  | .MLRFVNESF | LKVSNKELVH | INIHISRNNL | FFNKRIIRRV | DNIIRVDIDR |
| plyo  | MFLKRIKQKV | QFIRKFKTLK | SEIASVKIEI | KKKENNICTV | QNIFCEKKKK |
| chtr  | .....      | .....      | .....      | .....      | .....      |
| chmu  | .....      | .....      | .....      | .....      | .....      |
| chpn  | .....      | .....      | .....      | .....      | .....      |
| trde  | .....      | .....      | .....      | .....      | .....      |
| trpa  | .....      | .....      | .....      | .....      | .....      |
| bobu  | .....      | .....      | .....      | .....      | .....      |

|         |       |       |       |       |       |
|---------|-------|-------|-------|-------|-------|
| myle    | ..... | ..... | ..... | ..... | ..... |
| mytu    | ..... | ..... | ..... | ..... | ..... |
| codi    | ..... | ..... | ..... | ..... | ..... |
| ripr    | ..... | ..... | ..... | ..... | ..... |
| rico    | ..... | ..... | ..... | ..... | ..... |
| psfl    | ..... | ..... | ..... | ..... | ..... |
| suso    | ..... | ..... | ..... | ..... | ..... |
| aepe    | ..... | ..... | ..... | ..... | ..... |
| arfu    | ..... | ..... | ..... | ..... | ..... |
| meba    | ..... | ..... | ..... | ..... | ..... |
| meth    | ..... | ..... | ..... | ..... | ..... |
| pyho    | ..... | ..... | ..... | ..... | ..... |
| pyfu    | ..... | ..... | ..... | ..... | ..... |
| pyab    | ..... | ..... | ..... | ..... | ..... |
| meja    | ..... | ..... | ..... | ..... | ..... |
| haNRC   | ..... | ..... | ..... | ..... | ..... |
| pyba    | ..... | ..... | ..... | ..... | ..... |
| bacel   | ..... | ..... | ..... | ..... | ..... |
| baan1   | ..... | ..... | ..... | ..... | ..... |
| bast    | ..... | ..... | ..... | ..... | ..... |
| basu    | ..... | ..... | ..... | ..... | ..... |
| baha    | ..... | ..... | ..... | ..... | ..... |
| limo    | ..... | ..... | ..... | ..... | ..... |
| liin    | ..... | ..... | ..... | ..... | ..... |
| stau    | ..... | ..... | ..... | ..... | ..... |
| stpy    | ..... | ..... | ..... | ..... | ..... |
| stmu    | ..... | ..... | ..... | ..... | ..... |
| stpn    | ..... | ..... | ..... | ..... | ..... |
| lala    | ..... | ..... | ..... | ..... | ..... |
| enfa    | ..... | ..... | ..... | ..... | ..... |
| syne    | ..... | ..... | ..... | ..... | ..... |
| arthchl | ..... | ..... | ..... | ..... | ..... |
| prma    | ..... | ..... | ..... | ..... | ..... |
| mypu    | ..... | ..... | ..... | ..... | ..... |
| myge    | ..... | ..... | ..... | ..... | ..... |
| mypn    | ..... | ..... | ..... | ..... | ..... |
| urur    | ..... | ..... | ..... | ..... | ..... |
| saty    | ..... | ..... | ..... | ..... | ..... |
| esco    | ..... | ..... | ..... | ..... | ..... |
| yepe    | ..... | ..... | ..... | ..... | ..... |
| vich    | ..... | ..... | ..... | ..... | ..... |
| hain    | ..... | ..... | ..... | ..... | ..... |
| acac    | ..... | ..... | ..... | ..... | ..... |
| pamu    | ..... | ..... | ..... | ..... | ..... |
| psae    | ..... | ..... | ..... | ..... | ..... |
| psfl_1  | ..... | ..... | ..... | ..... | ..... |
| xyfa    | ..... | ..... | ..... | ..... | ..... |
| neme    | ..... | ..... | ..... | ..... | ..... |
| buAPS   | ..... | ..... | ..... | ..... | ..... |
| agtu    | ..... | ..... | ..... | ..... | ..... |
| sime    | ..... | ..... | ..... | ..... | ..... |
| melo    | ..... | ..... | ..... | ..... | ..... |

```

cacr .....
hepy26695 .....
hepyj99 .....
caje .....
thma .....
fepe .....
aqae .....

```

51

100

```

mask .....
stau2 .....M. ....TKKY
bace2 .....
baan2 .....MKKVDV. ....KESA
ocih .....
clpe .....MYKKVEL. ....PKGF
clac .....MYKKVDS. ....SKSF
cldi .....
pogi .....M SRRFAEYES. ....LDLS
bafr .....M SKKFAEYSQ. ....FDLS
feac .....V. ....NKSS
thvo .....MQ AQRYLIEQ. ....GNTI
thnw .....
cyhu .....KK. ....TELS
chte .....M PATYPEYPS. ....SLSY
dera .....MT KRTFAPVPT. ....QPNF
stco .....MT TPQYRQVPA. ....QVDL
thth .....MFKEVG. ....EPNF
deet .....KAVNP. ....RQNF
anga ...LRSTLL FVHGRGEQTC AAGSSKVKMN NITSDEMTR. ....LPET
drme .....MG.....K KLERNDVCR. ....VPEN
hosa .....MSNKMLQQ. ....VPEN
cael .....MSGLST. ....VPDN
asfu .....MS. ....
scpo .....MS. ....
sace .....MSE. ....SNAH
ledo .....MAGE GQQQQQDPPA GQKGVVKN. ....YPDV
lema .....
arth .....MEEVC. ....EGKE
teth .....MASKTTFKD. ....LQEI
encu .....M. ....YRKN
nolo .....
plfa .LSYYISGYR VNKLLSFVNF NKRIHTLRLE EMVTLTFTG. ....ISDN
plyo KIHTIIEKIG HEYPRNTHKI NSPKEKKNSE MATKTTFDY. ....VPDN
chtr .....MD. ....NEDK
chmu .....MD. ....NEDK
chpn .....MTAD. ....EVGK
trde .....
trpa .....MYTP. ....VDPK
bobu .....MFKK. ....VENK
myle .....VSTCVKWPRR RMTNSAYPRT DLGADQRGGS
mytu .....MTDNAYP. ....KLAGGA
codi .....MS DAVGGVYPR. ....VDMSSGT

```

|           |       |       |                 |            |             |             |       |
|-----------|-------|-------|-----------------|------------|-------------|-------------|-------|
| ripr      | ..... | ..... | .....           | .MTNTKYYP. | .....       | DVSAN       |       |
| rico      | ..... | ..... | MHI MKIFLKIISK  | IMTNTKYYP. | .....       | EVSSN       |       |
| psfl      | ..... | ..... | .....           | .MST.....  | .....       | EGSGP       |       |
| suso      | ..... | ..... | .....           | .....      | .....       | .....       |       |
| aepe      | ..... | ..... | .....           | .MGSVPRVL. | .....       | EGER        |       |
| arfu      | ..... | ..... | .....           | .....      | M.          | .....       | LPAK  |
| meba      | ..... | ..... | .....           | .....      | MIKE.       | .....       | ITAK  |
| meth      | ..... | ..... | .....           | .....      | MPIQE.      | .....       | AEKS  |
| pyho      | ..... | ..... | .....           | .....      | MIKEP.      | .....       | EFRD  |
| pyfu      | ..... | ..... | .....           | .....      | MIKEP.      | .....       | EFRD  |
| pyab      | ..... | ..... | .....           | .....      | MIKEP.      | .....       | EFRE  |
| meja      | ..... | ..... | .....           | .....      | MKKV.       | .....       | EPVN  |
| haNRC     | ..... | ..... | .....           | .....      | MSGFGD.     | .....       | VPDQ  |
| pyba      | ..... | ..... | .....           | .....      | MPHGDLP.    | .....       | LPPS  |
| bacel     | ..... | ..... | .....           | .....      | .....       | .....       | ..... |
| baan1     | ..... | ..... | .....           | .....      | .....       | .....       | ..... |
| bast      | ..... | ..... | .....           | .....      | MDYKETL     | LMPQTEFPMPR |       |
| basu      | ..... | ..... | .....           | .....      | MDFKDTL     | LMPKTDFFPMR |       |
| baha      | ..... | ..... | .....           | .....      | MDFKETL     | LMPKTDFFPMR |       |
| limo      | ..... | ..... | .....           | .....      | .....       | .....       | ..... |
| liin      | ..... | ..... | .....           | .....      | .....       | .....       | ..... |
| stau      | ..... | ..... | VKK.....        | .....      | MDYKETL     | LMPKTDFFPMR |       |
| stpy      | ..... | ..... | .....           | .....      | MKLKETL     | NLGKTAFFPMR |       |
| stmu      | ..... | ..... | .....           | .....      | MKLKETL     | NLGKTAFFPMR |       |
| stpn      | ..... | ..... | .....           | .....      | MKLKDTL     | NLGKTEFFPMR |       |
| lala      | ..... | ..... | .....           | .....      | MKIKDTL     | NLGKTAFFPMR |       |
| enfa      | ..... | ..... | M KARQMH.....   | .....      | MKMKETL     | QLGKTAFFPMR |       |
| syne      | ..... | ..... | M TEAKS.....    | .....      | YKDTV       | NLPQTRFDMR  |       |
| arthchl   | ..... | ..... | M AAKKASEGK     | QEDGKYKQTV | DLPKTGFPMR  |             |       |
| prma      | ..... | ..... | M KSKHNKE..K    | KSGFSYKETL | NLLKTDFFSMR |             |       |
| mypu      | ..... | ..... | M NEKK.....     | .....      | DYKDTL      | NMPQTNFEMQ  |       |
| myge      | ..... | ..... | .....           | .....      | MDLKKTL     | LMPKTSFAMQ  |       |
| mypn      | ..... | ..... | .....           | .....      | MNLKKTL     | LMPQTAFFEMQ |       |
| urur      | ..... | ..... | .....           | .....      | MKDYSSTL    | NMPPTGFEMR  |       |
| saty      | ..... | ..... | VFIKPKYGTE      | NLMSDYKSTL | NLPETGFPMR  |             |       |
| esco      | ..... | ..... | .....           | .....      | MSDYKSTL    | NLPETGFPMR  |       |
| yepe      | ..... | ..... | .....           | .....      | MSDYKNTL    | NLPETGFPMR  |       |
| vich      | ..... | ..... | .....           | .....      | MSEYKDTL    | NLPETGFPMR  |       |
| hain      | ..... | ..... | .....           | .....      | MTVDYKNTL   | NLPETSFFPMR |       |
| acac      | ..... | ..... | .....           | .....      | MTDYKNTL    | NLPETGFPMR  |       |
| pamu      | ..... | ..... | .....           | .....      | MTVDYKNTL   | NLPETGFPMR  |       |
| psae      | ..... | ..... | .....           | .....      | MTDYKATL    | NLPETAFFPMK |       |
| psfl_1    | ..... | ..... | .....           | .....      | MTDYKATL    | NLPDTAFFPMK |       |
| xyfa      | ..... | ..... | .....           | .....      | MSQDYKTTL   | HLPATDFFPMR |       |
| neme      | ..... | ..... | .....           | .....      | MTDYSKTV    | NLLESFFPMR  |       |
| buAPS     | ..... | ..... | .....           | .....      | MDDYKDTL    | NLPKTLFFSMR |       |
| agtu      | ..... | ..... | .....           | MSDT       | AEKLDYSSTL  | YLPQTDFFPMR |       |
| sime      | ..... | ..... | .....           | MTET       | AEKIDYSSTL  | YLPQTDFFPMR |       |
| melo      | ..... | ..... | MPTG YADGRSMTDT | VETIDYSKTL | YLPQTDFFPMR |             |       |
| cacr      | ..... | ..... | .....           | MADDA      | TTARDYRETV  | FLPDTPFFPMR |       |
| hepy26695 | ..... | ..... | .....           | .....      | MEEYKDTL    | NLNTTFFSMK  |       |
| hepyj99   | ..... | ..... | .....           | .....      | MKEYKDTL    | NLNETTFFSMK |       |

```

caje ..... MDYKETL LLPSTTFAMR
thma ..... MEYKNTL NLPKTSFPMK
fepe ..... MK
aqae ..... ME EKKVDLKD TL NLP RTEFPMK

```

101

150

```

mask ..... ** *****
stau2 LN..TQN.EI SAFWNTQK.. .IFKKSIDNR ...KGQESFV FYDGPPTANG
bace2 .....ET.RI RKQWNEQS.. .IFEQSIQNR ...EGAQSFV FYEGPPTANG
baan2 VG..REM.RI RKQWNEQN.. .IFEQSIQNR ...EGAQSFV FYEGPPTANG
ocih .....ER.SM RAHWKENR.. .TFORSIENR ...EGQQTIV FYEGPPTANG
clpe VG..VEK.EV ADLWKEKN.. .IIKKNFDMN ...QDGEYFT FYDGPPTANG
clac VD..IER.DV LKLWHEKE.. .IVKKSFNSN ...QDGEYFS FYDGPPTANG
cldi .....QV FDYWKDIN.. .ILEKTLEKG ...KDDPSFV FYEGPPTANG
pogi R..VNEE..V LADWMQHR.. .LFEESLKS R ...EGAPSFV FYEGPPSANG
bafr K..VNKD..V LKKWDENQ.. .VFAKSMTER ...EGCPSFV FFEGPPSANG
feac M...DIEKEI RKYWKENK.. .IIEDILNKD ...RNLKRYT FLEGPPTANG
thvo M...DIDNEI LRYWNDHA.. .INEKIFKKE ...GTKKFV FLEGPPTANG
thnw R...EIDSEI LKYWKDKN.. .ILEKILSKG ...GSKKFV FLEGPPTANG
cyhu E..VGKE..V QQFWNDKK.. .IFEKSVETR ...EGNPTFT FYEGPPSANG
chte S...AMEAQI REFWIERN.. .IFRKSLEKD ...APKGIYS FYEGPPTVNG
dera R...QLEADI LQKWKDEQ.. .VFEQTQTRP ...APAGEFV FYEGPPTANG
stco P...ALEHAV LDFWREQK.. .IFAKSLEQS ...EGRPEWV FYEGPPTANG
thth P...KLEEEV LAFWKREK.. .IFQKSVENR ...KGGPRYT VYEGPPTANG
deet P...QMEEDI LKLWQDKG.. .VFKKS IENR ...RDGKRFT LYEGPPTANG
anga INFPAEEEEKV LSYWQAEK.. .VFENCLKQS ...KGKPRYT FYDGP PFATG
drme INFPAEEENV LQKWRHEN.. .IFEKCSQLS ...KGKPKYT FYDGP PFATG
hosa INFPAEEEEKI LEFWTEFN.. .CFQECLKQS ...KHKPKFT FYDGP PFATG
cael INFAREEDKV AOKWQDEN.. .TFQRSVELS ...KDRPHFT FYDGP PFATG
asfu IDFPAEEEEIT LKRWREIN.. .AFGRQVELS ...RGRKPYT FYDGP PFATG
scpo FNVPKKEEKI VEFWREID.. .AFHTQLKLS ...QGRPTYT FFDGP PFATG
sace FSFPKKEEKV LSLWDEID.. .AFHTSLELT ...KDKPEFS FFDGP PFATG
ledo LDFAKMEEEV LAMWREKD.. .CFRTSMKLS ...EGRQPFS FYDGP PFATG
lema .....MEEEV LAMWREKD.. .CFRTSMKLS ...EGRQPFS FYDGP PFATG
arth FSFPRQEEDV LSFWTEID.. .AFKTQLKRT ...ENLPEYI FYDGP PFATG
teth PDFPKEEENI LKFWDEIN.. .AFKQLEKT ...KDCPPFT FYDGP PFATG
encu ANFVECEEEV LEYWRNK.. .SFERSCERS ...RGREKFT FYDGP PFATG
nolo .....
plfa PNIVEEEERI LKYWEDID.. .AFNLSNELS ...KNKKPYI FYDGP PFATG
plyo PNIVEEEEKI LKYWKNIN.. .AFELSNKLS ...KNRKPYI FYDGP PFATG
chtr ISISAKEEKI LSFWKEQD.. .IFQKTLNDR ...EGCPTFS FYDGP PFATG
chmu VSFPAKEEKV LTFWKEQN.. .IFQKTLENR ...DGSPTFS FYDGP PFATG
chpn NSFAPKKEEQV LKFWKDNQ.. .IFEKSLQNR ...QGKTLYS FYDGP PFATG
trde .FAKQEEDV LKFWEKND.. .VFKKS VSSR ...DGRDNYI FFDGP PFATG
trpa VDFVAQERRI LAFWRERR.. .VFEQSVAQR ...AQGKSYV FFDGP PFATG
bobu ANFPKIEEKI LKFWNDNK.. .IFEKSIKQR ...EGCEEFT FYDGP PFATG
myle PNFPALAEQV LDYWSNDD.. .TFRASIARC ...DDAPEYV FYDGP PFANG
mytu PDLPALELEV LDYWSRDD.. .TFRASIARR ...DGAPEYV FYDGP PFANG
codi NVFPDMERQV LEYWKDDE.. .TFKASLTNR ...EENPEYV FYDGP PFANG
ripr VDFAAIEQEI LKFWQNNN.. .IFQKSIDYR ...NGESEFI FYDGP PFANG
rico ADFAGLEREI LKFWQDNN.. .IFQKSIDDR ...NGESEFI FYDGP PFANG
psfl VRFPAVEDAV LERWEKEK.. .TFEQSISAR ...EGKPVYV FYDGP PFATG

```

|           |             |            |            |            |            |
|-----------|-------------|------------|------------|------------|------------|
| suso      | .....       | .....      | .....      | .....      | .....      |
| aepe      | YDQFALESFV  | KSYWEENS.. | .IYRKVKEKS | ..SRAPRKFY | FLDGPPYASA |
| arfu      | YSPKDVSEI   | FKFWEDND.. | .IYRKVKE.. | ...KGRKFY  | FVDGPPYTTG |
| meba      | YNAEQIEKKI  | TQLWKDS..  | .AYRKTREHR | ...KTGKRLF | FVDGPPYTTG |
| meth      | YKPHVIEEKV  | QSFWEERD.. | .IYERVKELR | ...EEGPRYS | FLDGPPYCSG |
| pyho      | YTPGKLEEKI  | EEFWKENN.. | .IYQKIKELR | ...KNGPKYY | FLDGPPYVSG |
| pyfu      | YTPGKLEEKI  | EQFWKESN.. | .IYQVKELR  | ...KNGPKYY | FLDGPPYVSG |
| pyab      | YDPKKLEEKV  | EKFWSENE.. | .IYRKVKELR | ...KDGPKYY | FLDGPPYVSG |
| meja      | FR..ELDKKI  | KKFWEEND.. | .IYQKVKKKN | ...ERNKEFY | FVDGPPYCSG |
| haNRC     | YDPAGVEERV  | FSYWEAVD.. | .AYEQTVDHR | ...ADAETFF | FVDGPPYTSG |
| pyba      | YRPHEVKKAV  | EEFWRRNR.. | .IFEKWKSWR | ...GGPKFT  | FLEGPPTTNG |
| bacel     | .....       | .....      | .....      | .....V     | LHDGPPYANG |
| baan1     | .....       | .....      | .....      | .....MV    | LHDGPPYANG |
| bast      | GNLPKREPQM  | QKKWEEMD.. | .IYRKVQER. | .T.KGRPLFV | LHDGPPYANG |
| basu      | GNLPNREPDI  | QKKWEEED.. | .IYRLVQER. | .T.KDRPKFV | LHDGPPYANG |
| baha      | GNLPNREPQM  | QEEWKDMN.. | .IYEKVQAR. | .T.KGRPLFV | LHDGPPYANG |
| limo      | .....       | .....      | .....      | .....I     | LHDGPPYANG |
| liin      | .....       | .....      | .....      | .....I     | LHDGPPYANG |
| stau      | GGLPNKEPQI  | QEKWDAED.. | .QYHKALEK. | .N.KGNETFI | LHDGPPYANG |
| stpy      | AGLPNKEPQW  | QAAWEQAE.. | .LYKKRQEL. | .N.AGKPAFH | LHDGPPYANG |
| stmu      | AGLPNKEPQW  | QKQWDEAN.. | .IYAKRQEL. | .N.ANKPAFF | LHDGPPYANG |
| stpn      | AGLPTKEPVW  | QKEWEDAK.. | .LYQRRQEL. | .N.QGKPHFT | LHDGPPYANG |
| lala      | AGLPNKEPNW  | QKDWADAT.. | .LYEKRQEL. | .N.EGKPSFM | LHDGPPYANG |
| enfa      | GNLPNREAEW  | QKDWEKGG.. | .LYEQRQKL. | .N.EGKPTFV | LHDGPPYANG |
| syne      | ANANKREPEI  | QQYWQEKG.. | .IYADLADN. | .N.PKD.LFV | LHDGPPYANG |
| arthchl   | ANSLTREPQL  | QKLWEENQ.. | .VFKRVSND. | .N.NGG.SFI | LHDGPPYANG |
| prma      | ANSVIREPEI  | HEFWSRKN.. | .IDLELGST. | .N.SGK.NFT | LHDGPPYANG |
| mypu      | AGLTRKEAQF  | RQRWLDNK.. | .LYHKILAK. | .N.KNNKQFV | VHDGPPYANG |
| myge      | ANLSTSEKNF  | HDFWKDKK.. | .VFQKLKKQ. | .N.KGKQIKI | LHDGPPYANG |
| mypn      | GKLTSTKEQQF | QAFWQSKR.. | .IYQKLHRQ. | .N.KDKPQKI | LHDGPPYANG |
| urur      | ANLNVKEPKI  | QQFWVEHQ.. | .IYEKLLTK. | .N.KDKKPI  | LHDGPPYANG |
| saty      | GDLAKREPGM  | LARWTDDD.. | .LYGIIRAA. | .K.KGKTFI  | LHDGPPYANG |
| esco      | GDLAKREPGM  | LARWTDDD.. | .LYGIIRAA. | .K.KGKTFI  | LHDGPPYANG |
| yepe      | GDLAKREPDM  | LKRWYEQD.. | .LYGIIRAA. | .K.KGKTFI  | LHDGPPYANG |
| vich      | GDLAKREPDM  | LQRWYQED.. | .LYGAIRQA. | .K.KGKSFV  | LHDGPPYANG |
| hain      | GDLAKREPDK  | XKNWYEKN.. | .LYQKIRKA. | .S.KGKSFI  | LHDGPPYANG |
| acac      | GDLAKREPVM  | LKNWYEKD.. | .LYQKIRQA. | .T.KGKSFI  | LHDGPPYANG |
| pamu      | GDLAKREPVM  | LKNWYEKD.. | .LYQKIRQA. | .S.KGKSFI  | LHDGPPYANG |
| psae      | AGLPQREPET  | LKFWNDIG.. | .LYQKLRAI. | .G.GDRPKFV | LHDGPPYANG |
| psfl_1    | AGLPQREPQI  | LQRWNSIG.. | .LYGKLREI. | .G.KDRPKFV | LHDGPPYANG |
| xyfa      | GDLPKREPAI  | LERWERDD.. | .FYAQLRAH. | .A.KGRPLFL | LHDGPPYANG |
| neme      | GNLAKREPAW  | LKSWYEQK.. | .RYQKLREI. | .A.KGRPKFI | LHDGPPYANG |
| buAPS     | GNLSKKEPNI  | LKSWNENN.. | .LYKLIRKK. | .N.QEKKIFF | LHDGPPYANG |
| agtu      | AGLPQKEPET  | VKRWQDMG.. | .LYKLLRAS. | .A.AGREKFV | LHDGPPYANG |
| sime      | AGLPQKEPET  | VARWQKME.. | .LYKLLRAS. | .A.AGREKFV | LHDGPPYANG |
| melo      | AGLPEKEPVL  | VKRWQDMD.. | .LYAKLRES. | .A.AGRTKYV | LHDGPPYANG |
| cacr      | AGLPKKEPEI  | LEGWAALSEK | GLYGAVRQKR | QA.AGAPLFV | FHDGPPYANG |
| hepy26695 | GNLSVNEPKT  | YAKWQEQ..  | QAFKRMQ.AR | .K.DNHGDFI | LHDGPPYANG |
| hepyj99   | GNLSVNEPKT  | YAKWQEQ..  | QAFKRMQ.NR | .K.DNHGDFI | LHDGPPYANG |
| caje      | ANLAELEPQR  | FKKWFQON.. | YAYEKMKENR | .K.NAKKSFT | LHDGPPYANG |
| thma      | ANLVNKEKVF  | LEEWKMD..  | .LYNYVLEQ. | .R.KGKPLFV | LHDGPPYANG |
| fepe      | ANLVNKEPEM  | LKFWEEKE.. | .IYKKTLET. | .R.ANAPTYL | LHDGPPYANG |



aqae ANLPQREPQI LEKWKG.... .LYEKIQKE. .R.KGREVFV LHDGPPYANG

151

200

mask .\*\*\*\*\* \*\*\*\*\* \*\*\*\*\* \*\*\*.\*\*\*\*\* \*\*\*\*\*...

stau2 .LPHAGHVLG RVIKDLVARL KTMQGFYVER KAG.WDTHGL PVELEVEKKI

bace2 .LPHVGHALG RTIKDVVARY KTMAGYKVL R KAG.WDTHGL PVELGVEKQL

baan2 .LPHVGHALG RTIKDVVARY KTMAGYKVL R KAG.WDTHGL PVELGVEKQL

ocih .MPHAGHALG RTIKDFVARY KTMMSGYQVLR KAG.WDTHGL PVELEVEKQL

clpe .KPHVGHVLT RVMKDIIPRY KVMKGYKVIR KAG.WDTHGL PVELEIEKKL

clac .RPHVGHIIIT RVMKDLIPRY KVMKGYKVP R KAG.WDTHGL PVELEIEKKL

cldi .NPGVHHVLS RTLKDSVCRY KTMMSGYQV R KAG.WDTHGL PVEIQVEKEL

pogi .MPGIHHVMA RAIKDTICRY KTMKGFVRDR KAG.WDTHGL PVELGVEKSL

bafr .MPGIHHVMA RSIKDIFCRY KTMKGYQV R KAG.WDTHGL PVELGVEKSL

feac .RPHVGHLM T RTVKDTVMRY KYMSGYD IGR RTGGWDCHGL PVELEAEKHF

thvo .RPHIGHAM T RTIKDIVLRY NTMTGHKIY R YGGWDCHGL PVELEAEKYF

thnw .RPHIGHAM T RTIKDIVLRY NTMTDHKIY R RVGGWDCHGL PVELEAEKHF

cyhu .TPGIHHVM G RTVKDIFCRF KTMQGFQV R KAG.WDTHGL PVELQVEKEL

chte .KPGVHHLFS RTIKDVVCRY HTMQGYQV R KAG.WDTHGL PVEISVEKKL

dera .KPALHHVLA RSFKDLFPRF KVMQGHVTR KAG.WDTHGL PVEISVEKKL

stco .MPGAHHIEA RVFKDVFPRF RTMRGYHVGR KAG.WDCHGL PVELAVEKEL

thth .LPHVGHQA R RSYKDLFPRY KTMRGY YAP RAG.WDTHGL PVELEVEKKL

deet .RPGIHHVLS RVFKDIVPRY KVMKGY YAP IGG.WDTHGL PVELEVEKEL

anga .LPHYGHILA GTVKDIVTRY AHQQGYHVER RFG.WDCHGL PVEYEIDKTL

drme .LPHYGHILA GTIKDIVTRY AYQQGYHVDR RFG.WDCHGL PVEFEIDKLL

hosa .LPHYGHILA GTIKDIVTRY AHQSGFHVDR RFG.WDCHGL PVEYEIDKTL

cael .LPHYGHMLT STIKDVVGRW AHQNGHYVER RFG.WDTHGL PVEYEIDKTL

asfu .LPHYGHLLA STIKDIIPRY WSMKGY YVER RFG.WDTHGV PIEYEIDKKL

scpo .RPHHGHLA STIKDSVTRY ACLKGYHVER RFG.WDTHGL PVEHEIDKKL

sace .TPHYGHILA STIKDIVPRY ATMTGHHVER RFG.WDTHGV PIEHIIDKKL

ledo .LPHYGHILA GTIKDMVTRF AYQTNHHVIR RFG.WDCHGL PVEYEIDKML

lema .LPHYGHILA GTIKDMVTRF AYQTNHHVIR RFG.WDCHGL PVEYEIDKML

arth .LPHYGHILA GTIKDIVTRY QTMTGHHVTR RFG.WDCHGL PVENEIDRKL

teth .LPHYGNLLA GTIKDVVCRY ASQNGKYVER RFG.WDCHGL PVEYEIDKKL

encu .LPHYGHLLS GTIKDTVTRF FYQQGYDVDR RFG.WDCHGL PVEYEIDKKL

nolo ..... WDRHGV PVEYEIDKAL

plfa .LPHYGHLLA GIIKDCVTRY FYQSNFYVER RFG.WDCHGL PVEYEIEKEN

plyo .LPHYGHLLA GIIKDCVTRY FYQSGYSVER RFG.WDCHGL PVEYEIEKEN

chtr .LPHYGHLLA GTIKDVVCRY ASMDGHYVPR RFG.WDCHGV PVEYEVEKSL

chmu .LPHYGHLLA GTIKDVVCRY ATMDGHYVPR RFG.WDCHGV PVEYEVEKSL

chpn .LPHYGHLLA STIKDVVGRY ATMDGY YVPR RFG.WDCHGV PVEYEVEKSL

trde .LPHFGHFVP GTIKDIIPRY KTMKGFVRER RFG.WDCHGL PVENLIEKEL

trpa .LPHFGHFVP STIKDIIPRY QTMRGAYVPR RFG.WDCHGL PIEHLIEQEL

bobu .LPHFGHFVP NTIKDIIPRY QTMQGYKVR NFG.WDTHGL PVEYEVEKKL

myle .LPHYGHLLT GYVKDIVPRY RTMCGYKVER RFG.WDTHGL PAELEVERQL

mytu .LPHYGHLLT GYVKDIVPRY RTMRGYKVER RFG.WDTHGL PAELEVERQL

codi .LPHYGHLLT GYVKDIVPRY QTMKGLVNR VFG.WDCHGL PAELEAEKQL

ripr .LPHYGHLLT GFIKDVYARY KTIKGGKVER RFG.WDCHGL PAEMQSEKEL

rico .LPHYGHLLT GFIKDVYARY QTIKGGKVER RFG.WDCHGL PAEMQSEKEL

psfl .LPHYGHILT SYIKDIVPRY QTMLGKQVPR RWG.WDCHGL PVEFEVEKAM

suso ..... MIKDCILRY QRVLGKRVHD QPG.YDTHGL PIEVATEKLL

aepe KSIHIGTAWN KVVKDVVLR YRMTGYNVWD KPG.YDTHGL PIEVKIEQSL

arfu .RIHLGTAWN KVLKDTILRY KRMMGFAPT TPG.WDMHGL PIEVKVEQEL

|           |            |            |            |            |            |
|-----------|------------|------------|------------|------------|------------|
| meba      | .HIHLGTAWN | KIIKDSILRY | YSMNNRNILE | RPG.WDMHGL | PIEVKVEGVL |
| meth      | .RIHLGTAWN | KIMKDSYLR  | KSMRGNVRR  | QPG.WDTHGL | PIEHKVEGIL |
| pyho      | .AIHLGTAWN | KIIKDMIIRF | RTMQGYNVWR | QPG.FDMHGL | PIEVKVEQAL |
| pyfu      | .AIHLGTAWN | KIIKDMIIRF | RTMQGYNVWR | QPG.YDMHGL | PIEVKVEQAL |
| pyab      | .AIHLGTAWN | KIIKDMIIRF | RTMQGYNVWR | QPG.YDMHGL | PIEVKVEQAL |
| meja      | .AIHLGTAWN | KIIKDTYLR  | KRMQGYNVD  | KAG.WDMHGL | PIEVKVENEF |
| haNRC     | .AAHMGTTWN | KTLKDAYIRY | HRMQGYDVT  | RPG.YDMHGL | PIETKVEEQ  |
| pyba      | .MPHVGHIRG | RTYKDVVIRF | YRLGQYDVWV | QGG.WDMQGM | PVEWEVEKKL |
| bacel     | .DIHMGHALN | KVLKDFIVRY | KSMTGFCAPY | VPG.WDTHGL | PIEQALTNGK |
| baan1     | .DIHMGHALN | KVLKDFIVRY | KSMTGFCAPY | VPG.WDTHGL | PIEQALTNGK |
| bast      | .DIHMGHALN | KILKDIIVRY | KSMNGYCAPY | VPG.WDTHGL | PIETALAKQG |
| basu      | .DIHMGHALN | KILKDFIVRY | KSMGYNAPY  | VPG.WDTHGL | PIETALTKNK |
| baha      | .DIHMGHALN | KVLKDMIVRY | KSMAGFHAPY | VPG.WDTHGL | PIEQALTKSG |
| limo      | .ELHMGHALN | KTIKDIIVRY | KSMAGFSSPY | VPG.WDTHGL | PIETAIAKKG |
| liin      | .ELHMGHALN | KTIKDIIVRY | KSMAGFSSPY | VPG.WDTHGL | PIETAIAKKG |
| stau      | .NLHMGHALN | KILKDFIVRY | KTMQGFYAPY | VPG.WDTHGL | PIEQALTKKG |
| stpy      | .NIHVGHALN | KISKDIIVRS | KSMGQFYAPY | VPG.WDTHGL | PIEQVLAKQG |
| stmu      | .NIHVGHALN | KISKDIIVRS | KSMGFRAPY  | IPG.WDTHGL | PIEQVLAKKG |
| stpn      | .NIHVGHAMN | KISKDIIVRS | KSMGQFYAPF | IPG.WDTHGL | PIEQVLSKQG |
| lala      | .NIHLGHSLN | KISKDIIVRY | KSMAGFRAPY | VPG.WDTHGL | PIEQQLAKAG |
| enfa      | .NIHLGHSLN | KISKDIIVRS | KSMGFRSPY  | VPG.WDTHGL | PIEQVLTNGK |
| syne      | .ALHMGHALN | KVLKDIINKY | KLQGHKVHY  | VPG.WDCHGL | PIELKVLQSL |
| arthchl   | .DLHMGHALN | KILKDIINRY | KLQNYKVQY  | VPG.WDCHGL | PIELKVLQSL |
| prma      | .SLHMGHALN | KVLKDIINKY | KLQGFKVHF  | IPG.WDCHGL | PIELKVLQSL |
| mypu      | .SIHIGHALN | KILKDIVVRF | KSLQGFYSPF | VPG.WDTHGL | PIENKMLSEL |
| myge      | .SIHVGHALN | KILKDFILRS | WLYEGYDVVF | IPG.WDCHGL | PIEHAHSVKN |
| mypn      | .NIHVGHALN | KILKDFVLR  | WNLQGFQTVF | IPG.WDCHGL | PIEHAHSVKN |
| urur      | .NIHIGHALN | KILKDFVVS  | HNMNNYSPY  | IPG.WDTHGL | PIEVALSKK. |
| saty      | .SIHIGHSVN | KILKDIIVKS | KGLSGFDSPY | VPG.WDCHGL | PIELKVEQEF |
| esco      | .SIHIGHSVN | KILKDIIVKS | KGLSGYDSPY | VPG.WDCHGL | PIELKVEQEY |
| yep       | .NIHIGHSVN | KILKDIIVKS | KGMAGYDSPY | IPG.WDCHGL | PIELKVEQLI |
| vich      | .DIHIGHALN | KILKDVIIKS | KTLSGFDAPY | IPG.WDCHGL | PIELMVEKKV |
| hain      | .NIHIGHAVN | KILKDIIVKS | KTALGFDSPY | IPG.WDCHGL | PIELKVEGLV |
| acac      | .TIHIGHAVN | KILKDIIVKS | KTALGFDSPY | IPG.WDCHGL | PIELKVEGLV |
| pamu      | .TIHIGHAVN | KILKDIIVKS | KTALGYDSPY | IPG.WDCHGL | PIELKVEGLV |
| psae      | .SIHIGHAVN | KILKDIIVRS | KTLAGYDAPY | VPG.WDCHGL | PIEHKVETTH |
| psfl_1    | .TIHIGHALN | KILKDMILRS | KTLSGFDAPY | VPG.WDCHGL | PIEHKVEVTY |
| xyfa      | .QIHLGHAVN | KILKDIIVKS | KHLGDFDAPY | IPG.WDCHGL | PIEIAIEKKY |
| neme      | .DIHIGHAVN | KILKDIIVRS | KTQAGFDAPY | VPG.WDCHGL | PIEVMVEKLH |
| buAPS     | .NIHIGHAVN | KILKDIIVKS | KNMSGFDAPY | IPS.WDCHGL | PIEQKVEEKI |
| agtu      | .NIHIGHALN | KILKDVITRS | FQMRGFDANY | VPG.WDCHGL | PIEWKIEEAY |
| sime      | .NIHIGHALN | KILKDVINRS | FQMRGFDANY | VPG.WDCHGL | PIEWKIEEKY |
| melo      | .NIHIGHALN | KILKDVITRS | FQMRGYDSTY | VPG.WDCHGL | PIEWKIEEQY |
| cacr      | .AIHIGHALN | KILKDFVRS  | RFALGYVDY  | VPG.WDCHGL | PIEWKIEEQF |
| hepy26695 | .HLHLGHALN | KILKDIVVKR | EYFKGKKIYY | TPG.WDCHGL | PIEQQILERL |
| hepyj99   | .HLHLGHALN | KILKDIVIKR | EYFKGKKIYY | TPG.WDCHGL | PIEQQILEQL |
| caje      | .HIHIGHALN | KILKETIIKT | HYFKGESVRF | TPG.WDCHGL | PIEQQVEVKL |
| thma      | .HIHIGTALN | KILKDIVVKY | KTMRGYRAPY | VPG.WDTHGL | PIEHRVSQEL |
| fepe      | .DIHLGTAMN | KILKDFVTRY | KTMRGYRVPF | VPG.WDTHGL | PIEHRVTTSL |
| aqae      | .HIHVGHALN | KILKDVINKY | NLLIGKNVNF | IPG.WDCHGL | PIERAWEKEL |

```

mask      . . . . . ***** ***** . . . . . * *****
stau2    GIKGK.QDIE KYGIENFINE CKKSVFNYE. . . . . KEWRDFS KDLGYWVDM
bace2    GISGK.HEIE EYGIIEPIK CKESVFTYE. . . . . KQWREFT ESIGYWVDM
baan2    GISGK.HEIE EYGIIEPIK CKESVFTYE. . . . . KQWREFT ESIGYWVDM
ocih     NIRGK.DDIE KFGVERFIEK CKESVFTYE. . . . . NEWKEFT DKLGYWVDM
clpe     GISGK.PQIE DYGVVEKFTV CKDSVFTYV. . . . . SMWEKMT EQIGYWVDM
clac     GISGK.PQIE EYGIIEKFTV CKESVFSYV. . . . . SLWKDMS EKLGYWVDM
cldi     GLTSK.QQIE EYGIIEFNQK CRESVFSFE. . . . . KQWRIMT ERMAYEVDLD
pogi     GITKE.DIGK SISVEEYNAA CRRDVMKFT. . . . . KEWEDLT HKMGYWVDM
bafr     GITKE.DIGK TISVAEYNAH CRQDVMKFT. . . . . KEWEDLT HKMGYWVDM
feac     GFNTK.KEIE DFGIEKFNEY CRNSVFTYI. . . . . DEWNEVD SEIGYWIDEN
thvo     GFKTK.SDII NYGVEKFNSY CRDSVFRYI. . . . . DEWKTVD QIIGFSIDHS
thnw     GFHTK.SEIV NFGVEKFNQY CRESIFRYI. . . . . DEWKQVD DLIGFSIDHN
cyhu     GITKE.DIGK KITVEQYNQK CREAVMKYK. . . . . SQWDELT VKMGYWVDLE
chte     GLKNK.SHVE EYGVGEFNRE ARALVYHHID DNREGWGKLT ERMGYWVDM
dera     GWLGRNHGAS REELEEFNRL CRTSVWETI. . . . . QDWNELT ERMGYWLDLG
stco     GFSGK.QDIE AYGIIEFNQA CRESVTRHT. . . . . DAFEELT TRMGYWADLQ
thth     GLKSK.REIE AYGIIEFNQA CRESVFTYE. . . . . KEWEAFT ERIAYWVDLE
deet     GFTSK.NDIE KYGIIEFNAR CRSSVFKYV. . . . . SEWNKLT ERIAYWVDLD
anga     NIRG.PDDVA KMGIKAYNNE CRKIVMRYA. . . . . NEWEQIV GRMGRWIDFK
drme     NIKG.PEDVA KMGIAAYNAE CRKIVMRYA. . . . . DEWENVV TRVGRWIDFK
hosa     GIRG.PEDVA KMGITEYNNQ CRAIVMRYA. . . . . AEWKSTV SRLGRWIDFD
cael     GISG.PQDVM KMGIANYNNE CRKIVMRYA. . . . . GEWEKTM GRLGRWIDFK
asfu     GMSG.LEAVE KLGIEKYNEE CRAIVMRFA. . . . . SEWRETI ERLGRWIDFD
scpo     GITG.SDDVM AMGIDKYNAE CRKIVMTYA. . . . . SEWRATV ERLGRWIDFD
sace     GITG.KDDVF KYGLENYNNE CRSIVMTYA. . . . . SDWRKTI GRLGRWIDFD
ledo     GIKTSHDDVA KLGIDKYNDE CKKIVTRYV. . . . . GEWRKTV XARWPLDYFD
lema     GIKTSHDDVA KLGIDKYNDE CKKIVTRYV. . . . . GEWRKTV AARWPLDYFD
arth     NIKR.RDEVI KMGIDKYNEE CRSIVTRYV. . . . . AEWEKVI TRCGRWIDFK
teth     GITN.RQEVN KMGVDKYNAE CRSIVMRYA. . . . . QEWRSIV NRFGRWIDFD
encu     GISS.RAEVN EMGIGKYNAE CRGIVMKYS. . . . . SEWEAVV ERLGRWVDFR
nolo     GITG.VKDIH DMGIRKYNKE CRKIVLRYT. . . . . KEWEAVV KRMGRWIDFR
plfa     NINK.REDIL NMGIDVYNEK CRGIVLKYS. . . . . KEWVATV QRIGRWIDFK
plyo     NINK.KEDIL KMGIDVYNEK CRSIVLKYS. . . . . NEWVNTV ERIGRWIDYK
chtr     GLTE.PGAIE RFGVANFNEE CRKIVFRYA. . . . . DEWKYFV DRIGRWVDFR
chmu     GLTE.PGAID RFGIANFNEE CRKIVFRYV. . . . . DEWKYFV DRIGRWVDFR
chpn     SLTA.PGAIE DFGIASFNEE CRKIVFRYV. . . . . HEWEYVI NRIGRWVDFR
trde     GLNS.KTDIE KYGIDKFNEA CRASVLRVY. . . . . KEWKQTI TRLGRWVDFE
trpa     NLNS.KSDVE SYGVSAFNAA CRSSVLRVY. . . . . KEWQRTL TRLGRWVDFD
bobu     GISG.KYEIE NYGIIEFNKE CRKIVLRYT. . . . . EEWKNI I LRLGRWVDFE
myle     GITD.KSQID AMGIAAFNEA CRKSVLRYT. . . . . EEWQAYV TRQARWVDFD
mytu     GITD.KSQIE AMGIAAFNDA CRASVLRVY. . . . . DEWQAYV TRQARWVDFD
codi     GIKD.KGEIE AMGLESFNKY CAKSVLEYT. . . . . QEWKDYV TRQARWVDFD
ripr     GISG.RIAIT NFGIEKFNNH CRASVMQYA. . . . . SEWEQYV TRQARWVDFK
rico     GISG.RLAIA NFGIEKFNAH CRASVMKYA. . . . . NDWEYV TRQARWVDFK
psfl     GFKS.KRDIL EFGVEQFNDE CRELVLYA. . . . . DDWRGFV NRMGRWVDFD
sus     GISNKQEIID KIGVETFIN KKEFALSNA. . . . . DKMTQN.F KNVGVFMDWE
aepe     GVRVKREIEE KVGVENFIAA CKRFVDENM. . . . . EAMTRQ.F KEIGVFMDWE
arfu     GFRTKRDIES .FGIDKFIER CMNYALANK. . . . . DAMTEQ.F KSLAVWMDWE
meba     GFKSKKDIES .FGVENFIEK KKEFAINQK. . . . . QEMTEQ.F QRLGVWMDWE
meth     GVRSKKDIED KIGIEEFVRK CREFAMENK. . . . . AVMTSQ.F QRLGVWMDWD
pyho     GLKTKKEIEE KIGVENFIK KKEFALNNL. . . . . KIMTEQ.F KMLGIWMDWD

```

|           |            |            |            |            |             |
|-----------|------------|------------|------------|------------|-------------|
| pyfu      | GLKTKKEIEE | KIGVENFIQK | CKEFALNNL. | ..RIMTEQ.F | KMLGVWMDWD  |
| pyab      | GLKTKKEIEE | KIGVENFIKK | CKEFALNNL. | ..KIMTEQ.F | KMLGIWMDWD  |
| meja      | GIKNKKEIET | KIGVKQFIEK | CKEFALKHK. | ..EIMEKQ.F | KNLGVWLDWE  |
| haNRC     | GFESKKDIEQ | .FGEEAFIEE | CKRFADDNL. | ..DGLQSD.F | QSFGVWMDWD  |
| pyba      | KLRSKKDIEQ | .FGLEKFALE | CNSLVEEYL. | ..AYWREWGT | KRLGLWLDLE  |
| bacel     | .....VKRK  | EMTVAEFRKL | CAEYAYEQV. | ...ERQREQF | KRLGVRADWD  |
| baan1     | .....VKRK  | EMTVAEFRKL | CAEYAYEQV. | ...ERQREQF | KRLGVRADWD  |
| bast      | .....VDRK  | SMSVAEFRKR | CEQYAYEQI. | ...DNQRRQF | KRLGVRGDWD  |
| basu      | K.....VNRK | EMSVAEFRKL | CEEYAWKQI. | ...EGQREQF | KRLGVRGDWE  |
| baha      | .....VDRK  | SMSVAEFRKL | CEEYAWKQI. | ...DRQREQF | MRLGVRGDWW  |
| limo      | .....VKRK  | EMSIAEFRKL | CAEYAMKQV. | ...DGQRTGF | KRLGINGDWE  |
| liin      | .....VKRK  | EMSIAEFRKL | CAEYAMTQV. | ...DGQRTGF | KRLGINGDWE  |
| stau      | .....VDRK  | KMSTAEFREK | CKEFALEQI. | ...ELQKKDF | RRLGVRGDFN  |
| stpy      | .....IKRK  | EMDLAEYLEM | CRQYALSQV. | ...DKQRDDF | KRLGVSADWE  |
| stmu      | .....VKRK  | EIDLADYLDL | CRQYALSQV. | ...DKQRQDF | KRLGVSGDWE  |
| stpn      | .....VKRK  | EMDLVEYLKL | CREYALSQV. | ...DKQREDF | KRLGVSGDWE  |
| lala      | .....MKRK  | EMDLLDYLEE | CRKYAMKQV. | ...DMQRSDF | KSLGVLADWD  |
| enfa      | .....VKRK  | EMTVAEYREK | CKEYALSQV. | ...DKQRNDF | KRLGVSGDWE  |
| syne      | K...S.SERA | ELTPLTLRHK | ARDFALKAQ. | ...QEQAQVF | QRYGIWGDWK  |
| arthchl   | D...Q.EVRK | ELTPLKLRK  | AAKFAKATV. | ...KTQMESF | KRFGVWADWN  |
| prma      | K...S.NERR | NLDSLGLRKK | ATDYAKIQI. | ...NNQLEGF | KRWGIWGDWD  |
| mypu      | K.....VNHK | QIEVVKLRKE | AAKYALNQM. | ...LIQKEQF | LKLQMLSDFE  |
| myge      | P.....SSYS | NLSTVEKRKL | CHQFALSQI. | ...AVQKEQF | QRLGLLNDFQ  |
| mypn      | P.....QHYA | SLSLSEKRD  | CKQFALSQI. | ...AIQKAQF | QRLGLLNDFS  |
| urur      | .....IKLS  | NLSVNERREQ | CKKYALEQV. | ...NNQIQQF | LRLGMISSDFK |
| saty      | GKPG...EKF | TA..AEFRAK | CREYAATQV. | ...DGQRKDF | IRLGVLGDWS  |
| esco      | GKPG...EKF | TA..AEFRAK | CREYAATQV. | ...DGQRKDF | IRLGVLGDWS  |
| yepo      | GKPG...EKF | SA..AEFRTA | CRKYAAEQV. | ...EGQKKDF | IRLGVLGDWD  |
| vich      | GKPG...QKV | TA..AEFREK | CREYAAGQV. | ...EGQKESF | KRLGILGEWD  |
| hain      | GKPN...EKI | SA..AEFRQK | CREYAAEQV. | ...EGQKKDF | IRLGVLGDWD  |
| acac      | GKPN...EKI | SA..AEFRQK | CREYAAEQV. | ...EGQKKDF | VRLGVLGDWD  |
| pamu      | GKPN...QNI | SA..AQFREA | CRQYAAEQV. | ...EGQKKDF | IRLGVLGDWD  |
| psae      | GKN.....L  | PA..DKTREL | CREYAAEQI. | ...EGQKADF | IRLGVLGEWD  |
| psfl_1    | GKN.....L  | GA..DKTREL | CRAYATEQI. | ...EGQKSEF | IRLGVLGEWD  |
| xyfa      | GKVG...VTL | DA..VQFRQK | CREYAAEQI. | ...QLQRRDF | KRLGIIGDWD  |
| neme      | GKD.....M  | PK..ARFREL | CREYAAEQV. | ...ARQKKDF | IRLGVLGDWD  |
| buAPS     | KSNQ...GEI | ST..TEFQEK | CRKYAQDQV. | ...EKQKKDF | IRLGVIIGDWD |
| agtu      | RARGKNKDEV | PV..NEFRKE | CRDFAAGWI. | ...KVQSEEF | KRLGIEGDFE  |
| sime      | REKGNKDEV  | PV..NEFRKE | CREFASGWI. | ...GIQTEEF | KRLGIEGDFE  |
| melo      | RAKGNKDEV  | PV..NEFRKE | CREFAAHWI. | ...TVQGGEF | QRLGVIGDFK  |
| cacr      | RAKGRRKDEV | PA..EEFRRE | CRAYAGGWI. | ...EAQKTEF | QRLGVIGDWW  |
| hepy26695 | EKEK..TSLE | NP..TLFREK | CRDHAKKFL. | ...EIQKNEF | LQLGVIGDFE  |
| hepyj99   | EKEK..TSLE | NP..TLFREK | CRDHAKKFL. | ...EIQKNEF | LQLGVIGDFE  |
| caje      | GEKK..KSLS | K...KEIREF | CRQHASEFV. | ...DIQREEF | KDLGIIADWD  |
| thma      | G.EK..IKEM | SP..AEIRKK | CEEYALRFV. | ...DIQREEF | KRLGVRGDWE  |
| fepo      | G.EE..AKKK | SP..AEIRKL | CHEFALKYV. | ...DIQREEF | KRLGVKGDWE  |
| aqae      | SKKK..IKKE | SLPKTEFREL | CREYAKKYV. | ...NIQREDF | VRLGVIGDWE  |

251

300

|       |            |            |            |            |            |
|-------|------------|------------|------------|------------|------------|
| mask  | *****      | *****      | *****      | *****      | *****      |
| stau2 | SPYITLENNY | IESVWNILST | FHKKGLLYKG | HKVTPYCTHD | QTALSSHEVA |
| bace2 | DPYVTLENPY | IESVWHILGT | IHEKGLLYKG | HRVSPYCPSC | QTSLSHEVA  |

|       |             |            |            |            |             |
|-------|-------------|------------|------------|------------|-------------|
| baan2 | DPYVTLENPY  | IESVWHILGT | IHEKGLLYKG | HRVSPYCPSC | QTSLSSEVA   |
| ocih  | DPYKTLNPNY  | IESVWNILAT | IHDEDLLYKG | HRVVPYCPNC | ETSLSSHEVA  |
| clpe  | NPYVTYHNPY  | IESVWWALKQ | MWDKLLLYKG | YKTMPCPRC  | GTSLSSHEVS  |
| clac  | NPYVTYHNDY  | IESVWWALKQ | MWDKDLLYKG | HKIVPYCPRC | GTALSSHEVA  |
| cldi  | NPYITLDNNY  | IESVWWILNK | FNKEGYIYEG | HKILPYCPRC | GTGLASHEVA  |
| pogi  | HPYITYDNRY  | IETLWLLAE  | LYKKGLLYKG | YTIQPYSPAA | GTGLSTHELN  |
| bافر  | HPYITYDNRY  | IETLWLLKQ  | LYKKGLLYKG | YTIQPYSPAA | GTGLSSHELN  |
| feac  | KSYVTLRNDY  | MESEWYALKK | LFDENMLVKD | YKIVPYCPRC | GTSLSSHEVA  |
| thvo  | GDYITLRNEY  | IESEWYVLKY | IYENGLLYKD | YTVVPYCPRC | ETSLSSHEVA  |
| thnw  | GDYITLRNDY  | MESEWFALKT | MYNSGLLYKD | YTVVPYCPRC | ETSLSSHEVA  |
| cyhu  | KPYITFENNY  | IESVWYLLKE | FHQKLLLYKG | YTIQPYSPAA | GTGLSSHELN  |
| chte  | SPYITCDNNY  | IESVWWALKT | IFDKGLIYKD | YKIVPQDPKS | ETVLSSHELA  |
| dera  | DPYITYQNSY  | VESVWNLLRR | LHEKGLVAQD | YKVVPLSPRI | SSTLSRAELG  |
| stco  | DPYRTMDPEY  | IESVWWSLKE | IFNKGLLVQD | HRVAPWCPRC | GTGLSDHELA  |
| thth  | DAYATLEPTY  | IESIWWSLKN | LFDRGLLYRD | HKVVPYCPRC | GTPLSSHEVA  |
| deet  | NAYITMDNNY  | IESGWWALKQ | MWDKGLVYQG | HRVTPHCPRC | GTSLSSHEVA  |
| anga  | NDYKTLYPWY  | MESIWWVFKQ | LYAKGFVYQG | VKVMPYSTAC | TTALSINFESG |
| drme  | NDYKTLYPWY  | MESIWWVFKQ | LFDKGLVYQG | VKVMPYSTAC | TTSLSNFEAN  |
| hosa  | NDYKTLYPQF  | MESVWWVFKQ | LYDKGLVYRG | VKVMPFSTAC | NTPLSNFESH  |
| cael  | HDYKTLYPWF  | MESVWWAFSE | LHKKGLVYKG | VKVMPFSTAC | STPLSNFEAG  |
| asfu  | NDYKTMNSSF  | MESVWWVFKQ | LFDKGLVYRG | YRVMPYSTAL | NTPLSNFEAQ  |
| scpo  | NDYKTLYPSF  | MESVWWVFKQ | LHTKGKVYRG | YRVMPYSTAC | TTPLSNFEAQ  |
| sace  | NDYKTMYPSTF | MESTWWAFKQ | LHEKGQVYRG | FKVMPYSTGL | TTPLSNFEAQ  |
| ledo  | NDYKTMHLTY  | MESIWWVFSQ | LWEKKMVYRG | FRVMPYSTAC | TTPLSNFEAN  |
| lema  | NDYKTMHLTY  | MESIWWVFSQ | LWEKKMVYRG | FRVMPYSTAC | TTPLSNFEAN  |
| arth  | NDYKTMDLPF  | MESVWWVFSQ | LWEKNLVYRG | FKVMPYSTGC | KTPLSNFEAG  |
| teth  | NDYKTLDLKF  | MESVWWVFKQ | MFDKGLVYRG | CKVMPYSNGC | ATVLSNFETQ  |
| encu  | DGYRTMDMTF  | MESVWNIFKE | LFSRGLIYRG | FRVMPFSTAC | STPLSNFESN  |
| nolo  | NGYRTMDRSF  | MESIWHIFKM | LYEKGSVYRG | HRVMPYSTAC | STPLSNFEAN  |
| plfa  | NDYKTMDKSF  | MESVWWVFSQ | LYKNNYIYKS | FKVMPYSCKC | NTPISNFELN  |
| plyo  | NDYKTMDKDF  | MESVWWVFSQ | LYKNNYIYKS | FKVMPYSCKC | NTPISNFELN  |
| chtr  | ATWRTMDLSF  | MESVWWVFRS | LYDQGLVYEG | TKVVPFSTKL | GTPLSNFEAG  |
| chmu  | ATWKTMDLSF  | MESVWWVFSQ | LYKQGLVYEG | TKVVPFSTKL | GTPLSNFEAG  |
| chpn  | STWKTMDASF  | MESVWWVFSQ | LYNQGLVYEG | TKVVPFSTAL | GTPLSNFEAS  |
| trde  | NDYKTMEPAF  | MESIWWVMKS | LWEKGLLYEG | YYILPYCPRC | STVLSNHELN  |
| trpa  | NDYKTMDCY   | MESVWWVVAQ | LWQRKLLYEG | YKILPYCPRC | ATALSNHELN  |
| bobu  | KGYKTMDISF  | MESVWWVFKN | LYEKGLIYES | YYVLPYSPKL | ATPLSNFEVN  |
| myle  | NDYKTLDLSY  | MESVIWAFKQ | LWDKGLAYES | YRVLPYCWRD | ETPLSNHELRL |
| mytu  | NDYKTLDLAY  | MESVIWAFKQ | LWDKGLAYEG | YRVLPYCWRD | ETPLSNHELRL |
| codi  | NGYKTMDMDF  | MESVMWAFKT | LYDKGLIYQG | FRVLPYSWAE | HTPLSNQETR  |
| ripr  | NAYKTMDKNF  | MESVLWAFKE | LYNKDLLYES | MRVMPYSWAC | ETPLSNFETR  |
| rico  | NSYKTMDKNF  | MESVLWAFKE | LYNKGLLYES | MRVMPYSWAC | ETPLSNFETR  |
| psfl  | GAYKTMDNDY  | MESVLWGFKT | LHDKGHVYER | GKIVPYCVRC | QTVLSNFEAR  |
| suso  | RPYYTLDPSY  | ISSWSVIKK  | AYEKGMLDKG | TAVLHWCPRC | ETTLSDYEVS  |
| aepe  | NPYVTYRDEY  | IESGWWLVKK | AWEKGLLYKG | YRVLHWCPRC | ETTLDYEVS   |
| arfu  | NPYMTIKAEY  | MNAAWFAIKR | AHERGLLERK | KMVVNWCHRC | ETALADAEV.  |
| meba  | APYMTLKDDY  | IEAAWWTLKQ | ASEKNLLDVG | KRSVNWCPRC | ETAIADSEV.  |
| meth  | DPYVTFDPAY  | MESCWWTLKR | AHEKDLLLRD | LRVITWCPRC | ETALALAEI.  |
| pyho  | DPYMTIKNEY  | IESAWFTLKK | AWEKGLLEKD | KRVLHWCPRC | ETALAEHEVR  |
| pyfu  | NPYMTIKNEY  | IESAWFTLKR | AWEKGLLEKD | KRVLHWCPRC | ETALAEHEVR  |
| pyab  | NPYMTIKNEY  | IESAWFTLKR | AWEKGLLEKD | KRVLHWCPRC | ETALAEHEVR  |
| meja  | NAYMPITKEY  | MEIGWWTLKV | AHEKGLLTRD | LRVVYWCPRC | ETALAEHEVR  |

|           |             |             |            |            |            |
|-----------|-------------|-------------|------------|------------|------------|
| haNRC     | NPYKTVDP    | MEAAWWAFSE  | VHDNGLVERG | QRSISQCPRC | ETAIANNEV. |
| pyba      | NAYETRQPHY  | LQYAWRIVKR  | AHELGLLTED | YRVLWFCPRC | ETSLSDHEVA |
| bace1     | NPYITLLEPAY | EAQQIKVFGD  | MAKKGYYIKG | QKPVYWSPTS | ESALAEAEIE |
| baan1     | NPYITLLEPAY | EAQQIKVFGD  | MAKKGYYIKG | QKPVYWSPTS | ESALAEAEIE |
| bast      | NPYITLKP    | EAQQIKVFGD  | MAKKGYYIKG | LKPVYWSPTS | ESALAEAEIE |
| basu      | NPYVTLKP    | EAQQIRVFGD  | MAKKGYYIKG | LKPVNWSPTS | ESALAEAEIE |
| baha      | NPYVTLDKGF  | EAQQVKVFGD  | MAKKGYYIKG | KKPVYWSPTS | ESALAEAEIE |
| limo      | NPYITLLPEY  | EAEQIKVFGD  | MAKKGYYIKG | KKPVYWSPTS | ESALAEAEIE |
| liin      | NPYITLLPEY  | EAEQIKVFGD  | MAKKGYYIKG | KKPVYWSPTS | ESALAEAEIE |
| stau      | DPYITLKP    | EAAQIRIFGE  | MADKGLIYKG | KKPVYWSPTS | ESSLAEAEIE |
| stpy      | NPYVTLDPQF  | EADQIRVFGA  | MAEKGYIYRG | AKPVYWSWSS | ESALAEAEIE |
| stmu      | NPYITLVPKY  | EAAQIRVFGA  | MADKGYIYHG | AKPVYWSWSS | ESALAEAEIE |
| stpn      | NPYVTLTPDY  | EAAQIRVFGD  | MANKGYIYRG | AKPVYWSWSS | ESALAEAEIE |
| lala      | RPYLTLLEPEY | EAAQIRVFGK  | MAEKGYIYKG | QKPIYWSPTS | ESSLAEAEIE |
| enfa      | HPYITLDPEY  | EAAEIRVFGK  | MAEKGYIYKG | LKPIYWSPTS | ESSLAEAEIE |
| syne      | KPYLTLTPEY  | EAAQIGVFGA  | MALKGYIYRG | LKPVHWSPTS | RTALAEAEIE |
| arthchl   | NPYLTLDP    | EAAQIEVFGQ  | MALKGYIYRG | RKPVHWSPTS | RTALAEAEIE |
| prma      | NPYLTLKKNY  | ESAQIGVFGK  | MFLNGYIYRG | LKPVHWSPTS | RTALAEAEIE |
| mypu      | EIYLTLDKNF  | EAKQLKLFKK  | MFFDGLIYKG | LKPVYWSPTS | MSALAEAEIE |
| myge      | NCYYTIDESF  | QFKELELFLQ  | AIKKGLIFQD | LKPTYWSPIS | RTSLAEAEIE |
| mypn      | KYYKTIDESF  | QQNELDLFLQ  | AVKKDLIFQA | LKPTYWSPVS | RTSLAEAEIE |
| urur      | QRYLTLDHNY  | EIDQLKLFY   | MLKKGFIYQD | FKPVFWSWSS | QTALAESEIE |
| saty      | HPYLTMDFKT  | EANIIRALGR  | I IKNGLHKG | AKPVHWCVDC | RSALAEAEIE |
| esco      | HPYLTMDFKT  | EANIIRALGK  | I IKNGLHKG | AKPVHWCVDC | RSALAEAEIE |
| yepe      | HPYLTMDFKT  | EANIIRALSK  | I IDNGLHKG | AKPVHWCVDC | GSSLAEAEIE |
| vich      | KPYRTMDFVT  | EANIIRALGK  | IADNGLHKG  | FKPVHWCVDC | GSALAEAEIE |
| hain      | NPYLTMNFDT  | EANIIRTLGK  | VIENGLHKG  | SKPVHWCVDC | GSSLAEAEIE |
| acac      | NPYLTMNFNT  | EANIIRTLGK  | VIENGLHKG  | SKPVHWCVDC | GSSLAEAEIE |
| pamu      | NPYLTMNYHT  | EANIIRAFGK  | AVENGLHKG  | SKPVHWCVDC | ASSLAEAEIE |
| psae      | NPYKTMNFAN  | EANEIRALAE  | MVKQDFVFKG | LKPVNWCVDC | GSALAEAEIE |
| psfl_1    | NPYKTMNFKN  | EAGEIRALAE  | IVKGGFVFKG | LKPVNWCVDC | GSALAEAEIE |
| xyfa      | APYKTLDFRF  | EADEIRALAK  | IVDKGHLIRG | TKPVHWCVDC | GSALAEAEIE |
| neme      | RPYLTMDFKT  | EADTVRMLGE  | IYKSGYLYRG | AKPVQFCLDC | GSSLAEAEIE |
| buAPS     | NPHLTMNFKN  | EANI IKTLSK | IVQKKHLYQD | FKPIHWCLKC | ASSLSEAEIE |
| agtu      | NPYTTMNFHA  | EARIAGELLK  | IARSGQLYRG | SKPIMWSVVE | RTALAEAEIE |
| sime      | NPYTTMNFHA  | EARIAGELMK  | IARSGQLYRG | SKPVMWSVVE | RTALAEAEIE |
| melo      | NPYTTMAFHA  | ESRIAGELLK  | FALSGQLYRG | SKPVMWSVVE | RTALAEAEIE |
| cacr      | NRYATMDFTS  | EAKIVEEFHK  | FLATGQLYRG | SKPVMWSPVE | RTALADAEIE |
| hepy26695 | DPYKTMDFKF  | EASIYRALVE  | VAKKGLLKER | HKPIYWSYAC | ESALAEAEIE |
| hepyj99   | DPYKTMDFKF  | EASIYRALVG  | VAKKGLLKER | HKPIYWSYAC | ESALAEAEIE |
| caje      | KPYLTMKFEF  | EAAIYRTLCE  | IAKKGLLCER | SKPVFWSWAA | KSALAEAEIE |
| thma      | NPYITLKP    | EVKILDVFKT  | LVEQGNVYRS | LKPIYWCPRC | RTALAEAEIE |
| fepe      | HPYITLDP    | EYHILDVFKT  | LVENGNVYRG | NKPVYWCPTC | RTALAEAEIE |
| aqae      | HPYLTMDPKY  | EAEIRELGK   | FFERGLAYRS | KKPVYWCYID | KTAEAEAEIE |

301

350

|       |            |            |           |       |           |
|-------|------------|------------|-----------|-------|-----------|
| mask  | .....***** | *****..    | .....     | ..... | .....     |
| stau2 | QG...YKNVK | DLSAVVKFQL | TNSK..... | ..... | ...D..... |
| bace2 | QG...YKTVK | DLSATVKFKV | KDSE..... | ..... | ...N..... |
| baan2 | QG...YKTVK | DLSATVKFKV | KDSE..... | ..... | ...N..... |
| ocih  | QG...YKDVT | DLSVTAKFRI | KNKE..... | ..... | ...N..... |
| clpe  | QG...YKDVK | DLTAVAKFKV | KGED..... | ..... | ...N..... |

|       |         |        |             |            |          |            |
|-------|---------|--------|-------------|------------|----------|------------|
| clac  | QG...   | YKDVK  | EATAFVKFKV  | KGEE.....  | .....    | ...N.....  |
| cldi  | QG...   | YKEVK  | TNTVIAKFKK  | K.DA.....  | .....    | ...D.....  |
| pogi  | QPGC.   | YRDVK  | DTTCVAQFKI  | MDPK.....  | .....    | PEMQLHGD.. |
| bafr  | QPGC.   | YRDVK  | DTTVVAQFKM  | KNPK.....  | .....    | PEMAQWGT.. |
| feac  | QG...   | YKNTD  | DTSVYVKFRI  | KGSM.....  | .....    | ...N.....  |
| thvo  | QG...   | YKDVK  | DPSVYVRFKE  | KGSE.....  | .....    | ...N.....  |
| thnw  | QG...   | YKDVK  | DPSVYVRFKS  | ADEE.....  | .....    | ...N.....  |
| cyhu  | QPGT.   | YKDVR  | DTSAVAQFKL  | KAN.....   | .....    | PKFADN.... |
| chte  | LG...   | YKEVQ  | DPSVYIKFRL  | KDS.....   | .....    | .....G..   |
| dera  | EVDS.   | YRMVD  | DPSVYVRLPI  | VWDTLPERAH | AA.....L | SSLSGEQRQ. |
| stco  | QG...   | YETVV  | DPSVYVRFPL  | TSG.....   | .....    | .PLAGEA... |
| thth  | LG...   | YKEIQ  | DPSVYVRFPL  | KEP.....K  | .....    | .KLGLEK... |
| deet  | QG.Y.   | KDNTE  | DPSVFVKFEI  | AKESLAKAGL | AK.....K | WAYPADKP.. |
| anga  | Q.N..   | YKEVT  | DPAVFSFPI   | VG.....    | .....    | .DKD.G.... |
| drme  | Q.N..   | YKEVV  | DPCVVVALEA  | VS.....    | .....    | .LPN.T.... |
| hosa  | Q.N..   | YKDVO  | DPSVFTFPL   | EE.....    | .....    | .D.E.T.... |
| cael  | Q.N..   | YKDVV  | DPAVFGFKL   | LD.....    | .....    | .CPN.....  |
| asfu  | Q.N..   | YKDVO  | DPAVVVSFPL  | VD.....    | .....    | .DPE.....  |
| scpo  | Q.N..   | YKEVP  | DPAIVVAFQS  | IS.....    | .....    | .DPE.....  |
| sace  | Q.N..   | YKDVN  | DPAVTIGFNV  | IG.....    | .....    | .QEK.....  |
| ledo  | S.N..   | YKEVS  | DLAVTVAFQA  | RA.....    | .....    | .DP..N.... |
| lema  | S.N..   | YKEVS  | DLAVTVAFQA  | RA.....    | .....    | .DP..N.... |
| arth  | Q.N..   | YKEVP  | DPEIMVTFPV  | IG.....    | .....    | .DQD.N.... |
| teth  | Q.N..   | YKEVD  | DPSLFIAFKT  | AE.....    | .....    | .DPK.....  |
| encu  | Q.N..   | YKDVS  | DPSVLI AFPL | LK.....    | .....    | .PLGGY.... |
| nolo  | Q.N..   | YKDVS  | DPSILVAFPL  | RK.....    | .....    | .PFKGY.... |
| plfa  | L.N..   | YKDTP  | DPSIIISFIL  | CS.....    | .....    | .DFPKVKNVY |
| plyo  | L.N..   | YKDVS  | DPSIIVGFIL  | LE.....    | .....    | .NFPTFPECL |
| chtr  | Q.N..   | YKEVD  | DPSVVVKFAL  | QD.....    | .....    | .NOG.....  |
| chmu  | Q.N..   | YKEVD  | DPSVVAKFAL  | QD.....    | .....    | .DQG.....  |
| chpn  | Q.N..   | YKEVD  | DPSLVVRMPL  | QN.....    | .....    | .DSA.....  |
| trde  | LGG..   | YKDVH  | DPAITVRFKT  | LS.....    | .....    | .PVKTSPAGK |
| trpa  | LGG..   | YQDVS  | DPAITVRFEC  | TS.....    | .....    | .VVPGSPAAR |
| bobu  | LGE..   | YKEVN  | DPSLTIKFKI  | K.....     | .....    | .....      |
| myle  | MDDDVY  | QSRQ   | DPAVTLGFKV  | LG.....    | .....    | GD.....    |
| mytu  | MDDDVY  | QSRQ   | DPAVTVGFKV  | VG.....    | .....    | GQP.....   |
| codi  | LDDS.   | YKMRQ  | DPTLTVTFPI  | TG.....    | .....    | VKDDSA.... |
| ripr  | LDNA.   | YRERT  | DKAITVSFVL  | NEVTLINGII | .....S   | QKSDMK.... |
| rico  | LDNS.   | YRERA  | DKAVTVSFVL  | .....      | .....S   | HPVTTT.... |
| psfl  | LDDA.   | FRPRR  | DMSAYVKFRQ  | .....      | .....    | .....      |
| suso  | ....    | EYRDLE | DPSIYVKFKI  | KGEK.....  | .....    | .....      |
| aepe  | ....    | EYRELE | DPSIYVKFPV  | EGRE.....  | .....    | .....      |
| arfu  | ....    | EYWDEE | DPSIYVKFPV  | KGEK.....  | .....    | .....      |
| meba  | ....    | EYAERT | DPSIYVKFKI  | KGEE.....  | .....    | .....      |
| meth  | ....    | DYHEKE | DPSIYVKFPV  | SG.....    | .....    | .....      |
| pyho  | G...    | EYKLRK | DPSIYVKFPI  | EGKE.....  | .....    | .....      |
| pyfu  | G...    | EYKLRK | DPSIYVKFPV  | EGKE.....  | .....    | .....      |
| pyab  | G...    | EYKLRK | DPSIYVKFPV  | EGKE.....  | .....    | .....      |
| meja  | G...    | EYKEVY | DPSVYVKFRL  | ANEE.....  | .....    | .....      |
| haNRC | ....    | EYEDVT | DPSIYVRFDL  | DDR.....   | .....    | .....      |
| pyba  | L...    | GYDERE | DPSIYVKFRV  | EGGV.....  | .....    | .....      |
| bacel | YQD.... | ..KK   | SASIYVAFPV  | KDG.....   | .....K   | NVLEG..... |

|           |            |             |            |            |             |
|-----------|------------|-------------|------------|------------|-------------|
| baan1     | YQD.....KK | SASIYVAFSV  | KDG.....   | .....K     | NVLEG.....  |
| bast      | YKD.....KR | SPSIYVAFPV  | KDG.....   | .....K     | GVLEG.....  |
| basu      | YQD.....KR | SASIYVAFGV  | KDG.....   | .....K     | GVLEN.....  |
| baha      | YHD.....KR | SPSIYVAFPV  | KDG.....   | .....K     | NVLQQ.....  |
| limo      | YQD.....KT | SASIFVAFKV  | TDG.....   | .....K     | GVLDE.....  |
| liin      | YQD.....KT | SASIFVAFKV  | TDG.....   | .....K     | GVLDE.....  |
| stau      | YHD.....KR | SASIYVAFDV  | KDD.....   | .....K     | GVVDA.....  |
| stpy      | YHD.....ID | STSLYYANKV  | KDG.....   | .....K     | GILDT.....  |
| stmu      | YHD.....ID | STSLYYANRV  | KDG.....   | .....K     | DILDT.....  |
| stpn      | YHD.....LV | STSLYYANKV  | KDG.....   | .....K     | GVLDT.....  |
| lala      | YQD.....VR | SASIFVAFKA  | KDT.....   | .....K     | GKLPE.....  |
| enfa      | YKD.....VK | SPSIYVAFNV  | ADG.....   | .....K     | GLLDN.....  |
| syne      | YPEG....HT | SRSIYVSFPI  | TQAGE.KA.. | .....A     | EILAP.....  |
| arthchl   | YPEG....HI | SKSIYAIIFKL | VGG...AK.. | .....T     | SLLDE.....  |
| prma      | YPEE....HF | SKSIYVSLNI  | TKLSD.AV.. | .....L     | LKLEEKDLRN  |
| mypu      | YYD.....HV | SPSIYTCFTI  | TKG.....   | .....N     | EFVEV.....  |
| myge      | YKE.....VN | SIALYLTFKV  | SKSD.....  | .....      | .FLDE.....  |
| mypn      | YKE.....VK | TIGLYLTFTV  | VQSA.....  | .....      | .VLNS.....  |
| urur      | YAD.....RQ | SSAIYVKMKV  | VDHND..... | .....      | LFTDK.....  |
| saty      | YYD.....KT | SPSIDVAFRA  | VDQDAVKAKF | G.....L    | PGVS.....   |
| esco      | YYD.....KT | SPSIDVAFQA  | VDQDALKAKF | A.....V    | SNVN.....   |
| yepe      | YYD.....KT | SQSIDVRFNA  | VDTATVAAKF | G.....V    | SAVN.....   |
| vich      | YKN.....KV | SPSIDVRFKA  | ADEAAVLAKF | G.....L    | AAGHEG..... |
| hain      | YED.....KV | SPSIYVRFPA  | ESADEIEAKF | S.....A    | QGRG.....   |
| acac      | YED.....RV | SPSIYVRFPA  | ESAVEIEGKF | N.....A    | VGKG.....   |
| pamu      | YED.....KV | SPSIYVRFSA  | VDSDAVLAKF | N.....A    | TDKG.....   |
| psae      | YAD.....KK | SPTIDVGFPV  | ADADKLAAAF | G.....L    | AALD.....   |
| psfl_1    | YED.....KK | SSTIDVAFPI  | ADDAKLAEAF | G.....L    | ASLA.....   |
| xyfa      | YTD.....KT | SPMVDVAYPA  | LDPSALAAVF | N.....A    | TLPP.....   |
| neme      | YKD.....KV | SPAIDVAYPF  | KDTAALAAAF | G.....L    | AGIE.....   |
| buAPS     | YSK.....KK | SDSIIVGFKF  | KYKSIIEKLF | D.....F    | QISN.....   |
| agtu      | YHD.....VE | SDMIWVKFPV  | K.....     | .....      | .DAAPA..... |
| sime      | YAD.....VE | SDMIWVKFPV  | T.....     | .....      | .EGPEA..... |
| melo      | YQD.....YE | SDTIWAKFPV  | ANLVVANVVD | GQPAELNPDL | SDRSLD..... |
| cacr      | YHD.....HV | SPTIWVKFPV  | V.....     | .....      | .QGSDA..... |
| hepy26695 | YKM.....KK | SPSIFVAFGL  | KKES.....  | .....L     | EKLK.....   |
| hepyj99   | YKM.....KK | SPSIFVAFDL  | KKEG.....  | .....L     | EKLK.....   |
| caje      | YQD.....KE | DYSIFVAFDL  | DVKA.....  | .....C     | EKLG.....   |
| thma      | YHD.....HK | SPSIYVKFRS  | K.....     | .....      | ..ED.....   |
| fepe      | YHD.....HE | SPSIYVKFQM  | V.....     | .....      | ..DK.....   |
| aqae      | YYE.....KE | DPSIYVKFPL  | KSGEK..... | .....F     | GIKD.....   |

351

400

|       |       |       |       |       |       |
|-------|-------|-------|-------|-------|-------|
| mask  | ..... | ..... | ..... | ..... | ..... |
| stau2 | ..... | ..... | ..... | ..... | ..... |
| bace2 | ..... | ..... | ..... | ..... | ..... |
| baan2 | ..... | ..... | ..... | ..... | ..... |
| ocih  | ..... | ..... | ..... | ..... | ..... |
| clpe  | ..... | ..... | ..... | ..... | ..... |
| clac  | ..... | ..... | ..... | ..... | ..... |
| cldi  | ..... | ..... | ..... | ..... | ..... |
| pogi  | ..... | ..... | ..... | ..... | ..... |



|       |            |            |            |            |            |
|-------|------------|------------|------------|------------|------------|
| bafr  | .....      | .....      | .....      | .....      | .....      |
| feac  | .....      | .....      | .....      | .....      | .....      |
| thvo  | .....      | .....      | .....      | .....      | .....      |
| thnw  | .....      | .....      | .....      | .....      | .....      |
| cyhu  | .....      | .....      | .....      | .....      | .....      |
| chte  | .....      | .....      | .....      | .....      | .....      |
| dera  | .G.....    | .....      | .....      | .....      | .....      |
| stco  | .....      | .....      | .....      | .....      | .....      |
| thth  | .....      | .....      | .....      | .....      | .....      |
| deet  | .....      | .....      | .....      | .....      | .....      |
| anga  | .....      | .....      | .....      | .....      | .....      |
| drme  | .....      | .....      | .....      | .....      | .....      |
| hosa  | .....      | .....      | .....      | .....      | .....      |
| cael  | .....      | .....      | .....      | .....      | .....      |
| asfu  | .....      | .....      | .....      | .....      | .....      |
| scpo  | .....      | .....      | .....      | .....      | .....      |
| sace  | .....      | .....      | .....      | .....      | .....      |
| ledo  | .....      | .....      | .....      | .....      | .....      |
| lema  | .....      | .....      | .....      | .....      | .....      |
| arth  | .....      | .....      | .....      | .....      | .....      |
| teth  | .....      | .....      | .....      | .....      | .....      |
| encu  | .....      | .....      | .....      | .....      | .....      |
| nolo  | .....      | .....      | .....      | .....      | .....      |
| plfa  | NIQDDIQPLV | QKYSVLYDCY | MKSEKCDTSN | EKHADEDIYS | DHINVNKNNN |
| plyo  | EIQKEIDASD | SPTKILNEKP | QDGKKEEIDF | FKKY.EKLYE | PYFSRVKSNE |
| chtr  | .....      | .....      | .....      | .....      | .....      |
| chmu  | .....      | .....      | .....      | .....      | .....      |
| chpn  | .....      | .....      | .....      | .....      | .....      |
| trde  | AFE.....   | .....      | .....      | .....      | .....      |
| trpa  | EFCAAA.... | .....      | .....      | .....      | .....      |
| bobu  | .....      | .....      | .....      | .....      | .....      |
| myle  | .....      | .....      | .....      | .....      | .....      |
| mytu  | .....      | .....      | .....      | .....      | .....      |
| codi  | .....      | .....      | .....      | .....      | .....      |
| ripr  | .....      | .....      | .....      | .....      | .....      |
| rico  | .....      | .....      | .....      | .....      | .....      |
| psfl  | .....      | .....      | .....      | .....      | .....      |
| suso  | .....      | .....      | .....      | .....      | .....      |
| aepe  | .....      | .....      | .....      | .....      | .....      |
| arfu  | .....      | .....      | .....      | .....      | .....      |
| meba  | .....      | .....      | .....      | .....      | .....      |
| meth  | .....      | .....      | .....      | .....      | .....      |
| pyho  | .....      | .....      | .....      | .....      | .....      |
| pyfu  | .....      | .....      | .....      | .....      | .....      |
| pyab  | .....      | .....      | .....      | .....      | .....      |
| meja  | .....      | .....      | .....      | .....      | .....      |
| haNRC | .....      | .....      | .....      | .....      | .....      |
| pyba  | .....      | .....      | .....      | .....      | .....      |
| bacel | .....      | .....      | .....      | .....      | .....      |
| baan1 | .....      | .....      | .....      | .....      | .....      |
| bast  | .....      | .....      | .....      | .....      | .....      |
| basu  | .....      | .....      | .....      | .....      | .....      |

|           |           |       |       |       |       |
|-----------|-----------|-------|-------|-------|-------|
| baha      | .....     | ..... | ..... | ..... | ..... |
| limo      | .....     | ..... | ..... | ..... | ..... |
| liin      | .....     | ..... | ..... | ..... | ..... |
| stau      | .....     | ..... | ..... | ..... | ..... |
| stpy      | .....     | ..... | ..... | ..... | ..... |
| stmu      | .....     | ..... | ..... | ..... | ..... |
| stpn      | .....     | ..... | ..... | ..... | ..... |
| lala      | .....     | ..... | ..... | ..... | ..... |
| enfa      | .....     | ..... | ..... | ..... | ..... |
| syne      | .....     | ..... | ..... | ..... | ..... |
| arthchl   | .....     | ..... | ..... | ..... | ..... |
| prma      | KLLS..... | ..... | ..... | ..... | ..... |
| mypu      | .....     | ..... | ..... | ..... | ..... |
| myge      | .....     | ..... | ..... | ..... | ..... |
| mypn      | .....     | ..... | ..... | ..... | ..... |
| urur      | .....     | ..... | ..... | ..... | ..... |
| saty      | .....     | ..... | ..... | ..... | ..... |
| esco      | .....     | ..... | ..... | ..... | ..... |
| yepe      | .....     | ..... | ..... | ..... | ..... |
| vich      | .....     | ..... | ..... | ..... | ..... |
| hain      | .....     | ..... | ..... | ..... | ..... |
| acac      | .....     | ..... | ..... | ..... | ..... |
| pamu      | .....     | ..... | ..... | ..... | ..... |
| psae      | .....     | ..... | ..... | ..... | ..... |
| psfl_1    | .....     | ..... | ..... | ..... | ..... |
| xyfa      | .....     | ..... | ..... | ..... | ..... |
| neme      | .....     | ..... | ..... | ..... | ..... |
| buAPS     | .....     | ..... | ..... | ..... | ..... |
| agtu      | .....     | ..... | ..... | ..... | ..... |
| sime      | .....     | ..... | ..... | ..... | ..... |
| melo      | .....     | ..... | ..... | ..... | ..... |
| cacr      | .....     | ..... | ..... | ..... | ..... |
| hepy26695 | .....     | ..... | ..... | ..... | ..... |
| hepyj99   | .....     | ..... | ..... | ..... | ..... |
| caje      | .....     | ..... | ..... | ..... | ..... |
| thma      | .....     | ..... | ..... | ..... | ..... |
| fepe      | .....     | ..... | ..... | ..... | ..... |
| aqae      | .....     | ..... | ..... | ..... | ..... |

401

450

|       |       |       |       |       |                       |
|-------|-------|-------|-------|-------|-----------------------|
| mask  | ..... | ..... | ..... | ..... | ***** *****           |
| stau2 | ..... | ..... | ..... | ..... | ...TYFLSWT TTPWTLPANV |
| bace2 | ..... | ..... | ..... | ..... | ...EYFLGWT TTPWTLPANV |
| baan2 | ..... | ..... | ..... | ..... | ...EYFLGWT TTPWTLPANV |
| ocih  | ..... | ..... | ..... | ..... | ...EYILGWT TTPWTLPGNV |
| clpe  | ..... | ..... | ..... | ..... | ...KYFLAWT TTPWTLPSNV |
| clac  | ..... | ..... | ..... | ..... | ...KYILAWT TTPWTLPSNV |
| cldi  | ..... | ..... | ..... | ..... | ...EYFLAWT TTPWTLPSNV |
| pogi  | ..... | ..... | ..... | ..... | ...AFFLAWT TTPWTLPSNT |
| bafr  | ..... | ..... | ..... | ..... | ...PYFLAWT TTPWTLPSNT |
| feac  | ..... | ..... | ..... | ..... | ...RYLIAWT TTPWTLPSNE |
| thvo  | ..... | ..... | ..... | ..... | ...TYFVAWT TTPWTLPSNE |

|       |            |            |            |            |         |      |
|-------|------------|------------|------------|------------|---------|------|
| thnw  | .....      | .....      | .....      | ...TYFVAWT | TTPWTLP | SNE  |
| cyhu  | .....      | .....      | .....      | ...TYFLAWT | TTPWTLP | SNS  |
| chte  | .....      | .....      | .....      | ...ESILVWT | TTPWTLP | ISNV |
| dera  | .....      | .....      | .....      | ...LSLLVWT | TTPWTLP | SNT  |
| stco  | .....      | .....      | .....      | ...ALVVWT  | TTPWTLP | VSNT |
| thth  | .....      | .....      | .....      | ...ASLLIWT | TTPWTLP | PGNV |
| deet  | .....      | .....      | .....      | ...LYLLAWT | TTPWTLP | PANT |
| anga  | .....      | .....      | .....      | ...AALVGWT | TTPWTLP | PSNL |
| drme  | .....      | .....      | .....      | ...FFLV.WT | TTPWTLP | PSNF |
| hosa  | .....      | .....      | .....      | ...VSLVAWT | TTPWTLP | PSNL |
| cael  | .....      | .....      | .....      | ...RQLVAWT | TTPWTLP | PSNL |
| asfu  | .....      | .....      | .....      | ...TCLLAWT | TTPWTLP | PSNV |
| scpo  | .....      | .....      | .....      | ...VSFLAWT | TTPWTLP | PSNL |
| sace  | .....      | .....      | .....      | ...TQLVAWT | TTPWTLP | PSNL |
| ledo  | .....      | .....      | .....      | ...AYFLAWT | TTPWTLP | PSNL |
| lema  | .....      | .....      | .....      | ...AYFLAWT | TTPWTLP | PSNL |
| arth  | .....      | .....      | .....      | ...AAFVAWT | TTPWTLP | PSNL |
| teth  | .....      | .....      | .....      | ...TKFIAWT | TTPWTLP | PSNL |
| encu  | .....      | .....      | .....      | ..MLSLVAWT | TTPWTLP | PSNC |
| nolo  | .....      | .....      | .....      | ..SLSLVAWT | TTPWTLP | PSHM |
| plfa  | KNNNSNNNNN | NNTNCNDNNN | INLNYNNNCY | AQHCEVFAWT | TTPWTLP | PSNL |
| plyo  | LKTSNFDENK | KREDFSES.. | ..TSDTSN.. | .KVTEIIAWT | TTPWTLP | PSNL |
| chtr  | .....      | .....      | .....      | ....FLLAWT | TTPWTLP | VSNM |
| chmu  | .....      | .....      | .....      | ....ILLAWT | TTPWTLP | VSNM |
| chpn  | .....      | .....      | .....      | ....SLLVWT | TTPWTLP | PSNM |
| trde  | .....      | .....      | ....GKNAL  | PSDTYLLAWT | TTPWTLP | PSNL |
| trpa  | .....      | .....      | ...SWGASL  | PAHTCFLAWT | TTPWTLP | PCNA |
| bobu  | .....      | .....      | .....      | DKNEYLLVWT | TTPWTLP | PSNL |
| myle  | .....      | .....      | .....DED   | LVGAYLLVWT | TTPWTLP | PSNL |
| mytu  | .....      | .....      | .....DNG   | LDGAYLLVWT | TTPWTLP | PSNL |
| codi  | .....      | .....      | .....ADAS  | LVGAYALAWT | TTPWTLP | PSNL |
| ripr  | .....      | .....      | .....EGDN  | FKEYRILAWT | TTPWTLP | PANL |
| rico  | .....      | .....      | .....TG.S  | FKEYRILAWT | TTPWTLP | PSNL |
| psfl  | .....      | .....      | .....QD    | RPDTFFLAWT | TTPWTLP | PANV |
| suso  | .....      | .....      | .....      | ..NRYLLIWT | TTPWTIP | PSNV |
| aepe  | .....      | .....      | .....      | ..GEYLLVWT | TTPWTLP | PANA |
| arfu  | .....      | .....      | .....      | ..DTYIVIWT | TTPWTLP | PANM |
| meba  | .....      | .....      | .....      | ..NTFIVIWT | TTPWTIP | PANV |
| meth  | .....      | .....      | .....      | ..DTYILVWT | TTPWTLP | PANM |
| pyho  | .....      | .....      | .....      | ..NEYLLIWT | TTPWTLP | PANL |
| pyfu  | .....      | .....      | .....      | ..NEYLLIWT | TTPWTLP | PANL |
| pyab  | .....      | .....      | .....      | ..NEYLLIWT | TTPWTLP | PANL |
| meja  | .....      | .....      | .....      | ..NTYIVIWT | TTPWTLP | VANL |
| haNRC | .....      | .....      | .....      | ..EGSLVVWT | TTPWTIP | PANQ |
| pyba  | .....      | .....      | .....      | ..DEYLVWT  | TTPWTIP | VDNE |
| bacel | .....      | .....      | .....      | ..DEKYIIWT | TTPWTLP | PANL |
| baan1 | .....      | .....      | .....      | ..DEKYIIWT | TTPWTLP | PANL |
| bast  | .....      | .....      | .....      | ..DERIVIWT | TTPWTIP | PANL |
| basu  | .....      | .....      | .....      | ..GERIIIWT | TTPWTIP | PANL |
| baha  | .....      | .....      | .....      | ..DEKIVIWT | TTPWTIP | PANL |
| limo  | .....      | .....      | .....      | ..GTNIVIWT | TTPWTIP | PANM |
| liin  | .....      | .....      | .....      | ..GTNIVIWT | TTPWTIP | PANM |

|           |       |       |        |            |            |
|-----------|-------|-------|--------|------------|------------|
| stau      | ..... | ..... | .....  | ..DAKFIIWT | TTPWTIPSNV |
| stpy      | ..... | ..... | .....  | ..NTYIVVWT | TTPFTVTASR |
| stmu      | ..... | ..... | .....  | ..DTYIVVWT | TTPFTITASR |
| stpn      | ..... | ..... | .....  | ..DTYIVVWT | TTPFTITASR |
| lala      | ..... | ..... | .....  | ..DVEFVIWT | TTPWTIPSNL |
| enfa      | ..... | ..... | .....  | ..ETAFVIWT | TTPWTLPANL |
| syne      | ..... | ..... | .....Y | IDDLAVAIWT | TTPWTLPGNL |
| arthchl   | ..... | ..... | .....F | IPNIYLAVWT | TTPWTMPANA |
| prma      | ..... | ..... | .....S | LNKLFIAIWT | TTPWTIPGNE |
| mypu      | ..... | ..... | .....  | ..DDELLIWT | TTPWTLIANS |
| myge      | ..... | ..... | .....  | ..NANLLVWT | TTPWTLPNTQ |
| mypn      | ..... | ..... | .....  | ..GTKLLVWT | TTPWTLPNTQ |
| urur      | ..... | ..... | .....  | ..PTSLVIWT | TTPWTLPANL |
| saty      | ..... | ..... | .....  | .GPVSLVIWT | TTPWTLPANR |
| esco      | ..... | ..... | .....  | .GPISLVIWT | TTPWTLPANR |
| yepe      | ..... | ..... | .....  | .GPISLVIWT | TTPWTLPANR |
| vich      | ..... | ..... | .....  | KGDVSIWIWT | TTPWTLPANR |
| hain      | ..... | ..... | .....  | QGKLSAIIWT | TTPWTMPSNR |
| acac      | ..... | ..... | .....  | SGKLSAVIWT | TTPWTMPSNR |
| pamu      | ..... | ..... | .....  | TGNISAVIWT | TTPWTIPSNR |
| psae      | ..... | ..... | .....  | .KPAQIVIWT | TTPWTIPANQ |
| psfl_1    | ..... | ..... | .....  | .KPAAIVIWT | TTPWTIPANQ |
| xyfa      | ..... | ..... | .....  | DVQLAVPIWT | TTPWTLPASL |
| neme      | ..... | ..... | .....  | .GKAFAVIWT | TTPWTLPASQ |
| buAPS     | ..... | ..... | .....  | KKEIHLLIWT | TTPWTLPSSK |
| agtu      | ..... | ..... | .....  | LSGVSIVIWT | TTPWTIPGNR |
| sime      | ..... | ..... | .....  | LAGAFVIWT  | TTPWTIPGNR |
| melo      | ..... | ..... | .....  | LLDAHVIWT  | TTPWTIPGNR |
| cacr      | ..... | ..... | .....  | AVGAKLVIWT | TTPWTIPANR |
| hepy26695 | ..... | ..... | .....  | VKKASLVIWT | TTPWTLYANV |
| hepyj99   | ..... | ..... | .....  | VKKASLVIWT | TTPWTLYANV |
| caje      | ..... | ..... | .....  | VSKASAVIWT | TTPWTLVANQ |
| thma      | ..... | ..... | .....  | .PNFFIVIWT | TTPWTLPANV |
| fepe      | ..... | ..... | .....  | .PDTYIVIWT | TTPWTIPANV |
| aqae      | ..... | ..... | .....  | .KKVFIIWT  | TTPWTLPANL |

451

500

|       |            |          |       |       |            |
|-------|------------|----------|-------|-------|------------|
| mask  | *****      | .....    | ..... | ..... | .....***** |
| stau2 | ALAINKDLNY | SKIRVE   | ..... | ..... | .NEYIILATD |
| bace2 | ALAVHPNMEY | VKAKQE   | ..... | ..... | .GYVYIVAKE |
| baan2 | ALAVHPNMEY | VKAKQE   | ..... | ..... | .GHVYIVAKE |
| ocih  | ALAVNPEMTY | VKAKQG   | ..... | ..... | .EEIYVAKS  |
| clpe  | ALCINKAYDY | VEAKQAEG | ..... | ..... | .DEIFILAKE |
| clac  | ALAINKAYDY | VEVINN   | ..... | ..... | .GEHLILAKA |
| cldi  | SLTVNADVY  | LKVKKG   | ..... | ..... | .DEVYVSKP  |
| pogi  | ALCVGPEIEY | LAVQTF   | ..... | ..... | .NPYNGIPIT |
| bafr  | ALCVGPKIDY | VAVQSY   | ..... | ..... | .NAYTGQPIT |
| feac  | LLVVNKDFDY | SLVSDG   | ..... | ..... | .NNEYVLS   |
| thvo  | FLVVNPDIY  | SLIEYN   | ..... | ..... | .NAKYVASS  |
| thnw  | FLVVNPDIY  | SLVEAQ   | ..... | ..... | .GSRYYVASS |
| cyhu  | ALAVGENIEY | VLVSTF   | ..... | ..... | .NPYTFKPVQ |
| chte  | ALAVGRDIDY | VRVKHR   | ..... | ..... | .ETGEVLILA |

|       |            |            |      |       |       |             |
|-------|------------|------------|------|-------|-------|-------------|
| dera  | LAAVNPDLDY | VVADSP     | .... | ..... | ..... | ..SGRVIVAEG |
| stco  | AVAAHPDVTY | VVATDG     | .... | ..... | ..... | ..EEKLVVAEP |
| thth  | AAAVHPEYTY | AAFQVG     | .... | ..... | ..... | ..DEALILEEG |
| deet  | ALAVSAADQY | AILDMT     | .... | ..... | ..... | ..DYYMILAKP |
| anga  | ACCVHPELVY | AKVRETKTG  | .... | ..... | ..... | ..KVYIMMEC  |
| drme  | ACCVHPTMTY | VKVRDVKSD  | .... | ..... | ..... | ..RLFVLAES  |
| hosa  | AVCVNPEMQY | VKIKDVARG  | .... | ..... | ..... | ..RLLILMEA  |
| cael  | ALVVHPDMLY | VVTKDKTTG  | .... | ..... | ..... | ..IEYVVLEE  |
| asfu  | ALAVNPGFEY | IKILDEASK  | .... | ..... | ..... | ..KHYILLES  |
| scpo  | ALAVHPDLQY | IKILDKDSN  | .... | ..... | ..... | ..KKYILMES  |
| sace  | SLCVNADFAY | VKIYDETRD  | .... | ..... | ..... | ..RYFILLES  |
| ledo  | SLCVHPELDY | VKVLDTKSK  | .... | ..... | ..... | ..RHYWLAEA  |
| lema  | SLCVHPELDY | VKVLDTKSK  | .... | ..... | ..... | ..RHYWLAEA  |
| arth  | ALCVNAKFVY | VKVRNKNTG  | .... | ..... | ..... | ..KVYIVAES  |
| teth  | ALVINKDFDY | VKVLDAKTQ  | .... | ..... | ..... | ..EHYILAEC  |
| encu  | GLAVNPGFLY | GVFEHKE    | ...  | ..... | ..... | ..KFYLMHVD  |
| nolo  | AILVNQSFYI | AIFRLKS    | ...  | ..... | ..... | ..AFFIMQRD  |
| plfa  | ALCVNEHFYI | LRVYHIESQ  | .... | ..... | ..... | ..RMFIFAEC  |
| plyo  | ALCVNENLIY | LRILNKENN  | .... | ..... | ..... | ..RIFIFAEC  |
| chtr  | ALAVHPELTY | VRIKDKESG  | .... | ..... | ..... | ..DEYILGQE  |
| chmu  | ALAVHPGLTY | VRIQDKESG  | .... | ..... | ..... | ..EYILGQE   |
| chpn  | AIAVGETLVY | VRIQDKKSG  | .... | ..... | ..... | ..EQWILSQG  |
| trde  | GLAVGADIDY | ..ALIEYDG  | .... | ..... | ..... | ..AHYIMAVP  |
| trpa  | ALALGPQILY | ..VLIEAND  | .... | ..... | ..... | ..EHYILARS  |
| bobu  | GIAVGQEIEY | SKIFDKTKE  | .... | ..... | ..... | ..EILILGSK  |
| myle  | AVAVHPDVTY | VDVRAGDR   | ...  | ..... | ..... | ..RFVLAQA   |
| mytu  | AVAVSPDITY | VQVQAGDR   | ...  | ..... | ..... | ..RFVLAEA   |
| codi  | ALAVNPQVNY | VEVKVGDQGA | E    | ..... | ..AI  | RGQRVLLAEA  |
| ripr  | ALAVGSDIDY | AFVDKNEV   | ...  | ..... | ..... | ..CYIIAAS   |
| rico  | ALAVGSDIDY | ALVPKNDV   | ...  | ..... | ..... | ..CYIIAAY   |
| psfl  | ALAVAADENY | VCIEHGEE   | .... | ..... | ..... | ..RLWLAEG   |
| suso  | FVMINKDYDY | ADVEVNG    | .... | ..... | ..... | ..EILVIAKD  |
| aepe  | FVMAHPDMEY | VKVRVGR    | .... | ..... | ..... | ..DTLILAKA  |
| arfu  | AVAVHPSLEY | AKFRAVK    | .D   | ..... | ..G   | KVEYLILAKE  |
| meba  | AVAVHPGFEY | SKFRAIRQD  | .... | ..... | ..G   | SDEILIAATD  |
| meth  | AVAVHPDFDY | AHTRLDG    | ...  | ..... | ..... | ..ETYIMAEA  |
| pyho  | AVSAHPEYDY | VKVKVEFN   | ...  | ..... | ..G   | KEEYWILAKA  |
| pyfu  | AVSAHPDYDY | VKVRVDLN   | ...  | ..... | ..G   | REEYWILAKA  |
| pyab  | AVSAHPDYDY | VKVKVEFN   | ...  | ..... | ..G   | REEYWILAKA  |
| meja  | AVTVHPDYDY | AYVEVEFD   | .... | ..... | ..D   | KKEVWIIAEK  |
| haNRC | FVAVDEGDY  | QQVRATTPD  | .... | ..... | ..G   | ETDVLYVASE  |
| pyba  | AVAVHPDYVY | AKVEVEVG   | ...  | ..... | ..G   | RREYWLLAEA  |
| bacel | GISVHPELEY | AIVKVND    | ...  | ..... | ..... | ..EKYIIASE  |
| baan1 | GISVHPELEY | AIVKVND    | ...  | ..... | ..... | ..EKYIIASE  |
| bast  | AIAVHPDLDY | HVVVDVSG   | .... | ..... | ..... | ..KRYVVAAS  |
| basu  | GISVHPDLEY | SVIAVGE    | .... | ..... | ..... | ..DRFVVASA  |
| baha  | GIAVHPELEY | SVVAVKG    | .... | ..... | ..... | ..EKYVVASG  |
| limo  | GITVNPDLDY | VVIESAG    | ...  | ..... | ..... | ..EKYVVAEA  |
| liin  | GITVNPDLDY | VVIESAG    | ...  | ..... | ..... | ..EKYVVAEA  |
| stau  | AITVHPELKY | GQYNVNG    | .... | ..... | ..... | ..EKYIIAEA  |
| stpy  | GLTVGPDMDY | LVVKPAGSD  | .... | ..... | ..... | ..RQYVVAEG  |
| stmu  | GLTVGPDIDY | VVVKPANDE  | .... | ..... | ..... | ..RKFLVAQA  |

|           |             |            |            |            |            |
|-----------|-------------|------------|------------|------------|------------|
| stpn      | GLTVGADIDY  | VLVQPAGEA. | .....      | .....      | ..RKFVVAAE |
| lala      | GIFAHDPDYD  | SVVAVNG... | .....      | .....      | ..RKFVIASE |
| enfa      | GISVNPDFTY  | VEVKADG... | .....      | .....      | ..RKFVIAKD |
| syne      | AVALNPELTY  | AVVETESHIF | HRS.....   | .....      | ...YLIVALD |
| arthchl   | AVAVNAKLQY  | SVVEVQSFSE | DESTVTSNKK | KIPGKVLKNQ | QKLFVIVATD |
| prma      | AVAINPRINY  | VFASDQNGN. | .....      | .....      | ...IYLFARD |
| mypu      | GVAVGLDIEY  | SKVKFNK... | .....      | .....      | ..KNYIVASD |
| myge      | AIAIHPDFDY  | LLFEYNQ... | .....      | .....      | ..QKFVILEK |
| mypn      | AIAVHPQFEY  | LLFTYNN... | .....      | .....      | ..EQYVVLAS |
| urur      | AIAIHPELVY  | SLIEYKN... | .....      | .....      | ..ENYIIAKP |
| saty      | AISLAPDFDY  | ALVQIDG... | .....      | .....      | ..QAVILAKD |
| esco      | AISIAPDFDY  | ALVQIDG... | .....      | .....      | ..QAVILAKD |
| yepe      | AISLNAEYLY  | QLVQVEG... | .....      | .....      | ..ECLILAAD |
| vich      | AVCLRADLEY  | VLIQVEGE.. | .....      | .....      | QPERIIVASE |
| hain      | AIAVNADLEY  | NLVQLGD... | .....      | .....      | ..ERVILAAE |
| acac      | AISVNAELEY  | QLVQLGD... | .....      | .....      | ..ERVILAAD |
| pamu      | AIAIHENLDY  | QLVQFND... | .....      | .....      | ..ERVILAKD |
| psae      | ALNVHPEIDY  | ALVDAGD... | .....      | .....      | ..RYLVLAEA |
| psfl_1    | ALNVHPEFTY  | ALVDVGD... | .....      | .....      | ..RLLVLAAE |
| xyfa      | AISVGPTLDY  | VLVEGPTHSG | .....      | .....      | QRRWLILAEA |
| neme      | AVSVGADVY   | QLIDTPK... | .....      | .....      | ..GKLVLAKD |
| buAPS     | AISIHPDFQY  | QLIETER... | .....      | .....      | ..CYLIIAKE |
| agtu      | AIAFSSRVEY  | GLFEVESAQN | ..DFGP.... | .....Q     | TGEKLIFARK |
| sime      | AIAYSSRYAY  | GLYEVATAEN | ..DYGP.... | .....Q     | PGEKLIFAKR |
| melo      | AVSYSRVAY   | GLYEVATAEN | ..AFGP.... | .....E     | PGEKLIFADA |
| cacr      | AVSYNPDIPIY | SVFEVTALEE | GLEFEPWA.. | .....K     | PGDRLIADK  |
| hepy26695 | AIALKKDAVY  | ALTQKG.... | .....      | .....      | ...YLVAKA  |
| hepyj99   | AIALKKDAVY  | ALTQKG.... | .....      | .....      | ...YLVAKA  |
| caje      | AIALNPENY   | VITKEG.... | .....      | .....      | ...LIFASA  |
| thma      | GIALHPDYEY  | SVVKVGE... | .....      | .....      | ..EKWVIATD |
| fepe      | AIALHPDYTY  | VKIKVDE... | .....      | .....      | ..EYWIVAEG |
| aqae      | GIMVKEDADY  | VLVEVED... | .....      | .....      | ..EYWIVAKE |

501

550

|       |            |            |           |             |             |
|-------|------------|------------|-----------|-------------|-------------|
| mask  | **.....    | .....      | .....     | .....       | .....**     |
| stau2 | LINSIITEKY | EIID.....  | .....     | .....       | ....TFSGS   |
| bace2 | RVQDVLKEDY | EVLS.....  | .....     | .....       | ....VHKGE   |
| baan2 | RVQDVLKENY | EVLS.....  | .....     | .....       | ....VHKGE   |
| ocih  | LANTVLGEAY | EVVE.....  | .....     | .....       | ....EVSGE   |
| clpe  | LAPKVLGEGF | EIVR.....  | .....     | .....       | ....EFKGE   |
| clac  | LLTVLEGE.Y | EVVS.....  | .....     | .....       | ....EFKGE   |
| cldi  | LADKVLGEDY | EVLE.....  | .....     | .....       | ....EMK GK  |
| pogi  | VVLGKPLLHT | LFNPKG.... | ..ECEEIPA | SYDPAQKLLP  | YKVIASWK GK |
| bafr  | VVLAKALLNA | HFNPK....  | ..AAELKLE | DYKAGDKLVP  | FKVIAEYK GP |
| feac  | TVQSLFKDAK | ILKT.....  | .....     | .....       | ....IKGK    |
| thvo  | RAQYIFKDFK | VLKK.....  | .....     | .....       | ....MKGF    |
| thnw  | RAGYIFKEYR | EIRR.....  | .....     | .....       | ....MHGR    |
| cyhu  | VILAKALLGK | YFSEK....  | ..AKDLSLE | AYKDGD KLIP | FKILQSYK GK |
| chte  | ESRLSVLVEK | IGDES..... | .....     | .....A      | WEVIDRCKGS  |
| dera  | AVERLSALHK | DAAPL....  | .....     | .....       | ..EVLARFKGR |
| stco  | LLAKALGEGW | ETTG.....  | .....     | .....       | ....QSFTGA  |
| thth  | LGRKLLGEGT | QVLK.....  | .....     | .....       | ....TFPGK   |

|       |             |            |            |            |            |          |             |
|-------|-------------|------------|------------|------------|------------|----------|-------------|
| deet  | RLSALKLAEN  | PVAG       | .....      | .....      | .....      | .....    | ECLGS       |
| anga  | RIESLLKGP   | .          | .....      | .....      | .....      | EN       | YTILESFPGS  |
| drme  | RLSYVYKSE   | .          | .....      | .....      | .....      | TE       | YEVKEKFBVGK |
| hosa  | RLSALYKLE   | .          | .....      | .....      | .....      | SD       | YEILERFPGA  |
| cael  | RLGELKN     | ...        | .....      | .....      | .....      | DN       | LEVIEKLAGS  |
| asfu  | LLRTLYKDPK  | K          | .....      | .....      | .....      | AK       | FKIVDRFKGV  |
| scpo  | CLGILYKNPK  | K          | .....      | .....      | .....      | AN       | FEILERFQ GK |
| sace  | LIKTLYKKPK  | N          | .....      | .....      | .....      | EK       | YKIVEKIKGS  |
| ledo  | RLAEVYPKKD  | NKKASKAKDG | DN         | .....      | ..         | AAEADAAP | YTVVEKVKGA  |
| lema  | RLAEVYPKKD  | NKKASKAKDG | DN         | .....      | ..         | AAEADAAP | YTVVEKVKGA  |
| arth  | RLSALPTDKP  | KAKLSNGPAG | DTKKANPKAK | GAKPESAADS | YEVLEKFNGA |          |             |
| teth  | RLPELYKKD   | K          | .....      | .....      | .....      | DG       | YKILEKFKGS  |
| encu  | RIGEYFKDA   | .          | .....      | .....      | .....      | .        | RILQRVSGR   |
| nolo  | RVNVYFKDA   | .          | .....      | .....      | .....      | .        | VVISEVKGH   |
| plfa  | RLEWIMKELK  | WN         | .....      | .....      | .....      | VEN      | IKIVNRF LGS |
| plyo  | RMEWVIKELR  | LK         | .....      | .....      | .....      | IEN      | ICLLNRFK GK |
| chtr  | SLPRWFPDR   | .          | .....      | .....      | .....      | ES       | YEWIGQLSGK  |
| chmu  | SLARWFPDR   | .          | .....      | .....      | .....      | ES       | YKWIGQLSGE  |
| chpn  | CVSRWF SNP  | .          | .....      | .....      | .....      | EE       | FVILESFSGK  |
| trde  | RLEAYFAKSG  | KEE        | .....      | .....      | .....      | AKE      | YKLIWTKKGA  |
| trpa  | RLEFYYPDSS  | .          | .....      | .....      | .....      | A        | YRVVWEKRG E |
| bobu  | KLNSYYDDEN  | .          | .....      | .....      | .....      | S        | YTIIEKFKGS  |
| myle  | RLTAYARELG  | D          | .....      | .....      | .....      | E        | PEVLATYRGA  |
| mytu  | RLAAYARELG  | E          | .....      | .....      | .....      | E        | PVVLGTYRGA  |
| codi  | LVGAYAKELG  | E          | .....      | .....      | .....      | D        | HEVLTVRPGS  |
| ripr  | SVAKYAKELG  | L          | .....      | .....      | .....      | SG       | KENFEI IKGL |
| rico  | SVSKYAKELG  | L          | .....      | .....      | .....      | SG       | EENFEI IKGS |
| psfl  | CLGGLFDEP   | .          | .....      | .....      | .....      | .        | VILERTCTGA  |
| suso  | RVEAVMKEAS  | .          | .....      | .....      | .....      | ITN      | YKILRTYKGS  |
| aepe  | RLDHVMREAG  | .          | .....      | .....      | .....      | VSE      | YEVLEV LKGS |
| arfu  | LADSVLGKGD  | .          | .....      | .....      | .....      | YDS      | WEVVETYLGE  |
| meba  | LIENVLRQGR  | .          | .....      | .....      | .....      | YVD      | YEVLETMLGE  |
| meth  | LVEKVLG     | ...        | .....      | .....      | .....      | EE       | AEI IKTVRGS |
| pyho  | LVDKVLGEIG  | .          | .....      | .....      | .....      | VKG      | EVIEEFKGR   |
| pyfu  | LVEKVLGDIG  | .          | .....      | .....      | .....      | VKG      | EVVEEFK GK  |
| pyab  | LVDKVLGEIG  | .          | .....      | .....      | .....      | VKG      | EVVEEFK GR  |
| meja  | LVEEVINKAK  | KFHN       | .....      | .....      | .....      | IKN      | YKIIKKVK GK |
| haNRC | CVEDVLSAGG  | .          | .....      | .....      | .....      | YSD      | HEIVADHSGS  |
| pyba  | LVP SLMAKFG | .          | .....      | .....      | .....      | IKT      | WRVVETK KGV |
| bacel | LFETVAKTLE  | WENA       | .....      | .....      | .....      | .        | EVVKT VKGS  |
| baan1 | LFETVAKTLE  | WENA       | .....      | .....      | .....      | .        | EVVKT VKGS  |
| bast  | LAESVAKEIG  | WDAW       | .....      | .....      | .....      | .        | SVVKT VKGK  |
| basu  | LVENVASACG  | FDQY       | .....      | .....      | .....      | .        | EVTRTVK GK  |
| baha  | LVETLESALE  | WENP       | .....      | .....      | .....      | .        | EILRTIKGV   |
| limo  | LLPSLREKLG  | FEDA       | .....      | .....      | .....      | .        | TVVKT VRGS  |
| liin  | LLPSLREKLG  | FEDA       | .....      | .....      | .....      | .        | TVVKT VRGS  |
| stau  | LSDAVAEALD  | WDKAS      | .....      | .....      | .....      | .        | IKLEKEYT GK |
| stpy  | LLDSLAKFG   | WESF       | .....      | .....      | .....      | .        | ETLASHKGA   |
| stmu  | LLSELAERFA  | WDNP       | .....      | .....      | .....      | .        | QVLATHKGI   |
| stpn  | LLTSLSEKFG  | WADV       | .....      | .....      | .....      | .        | QVLETYR GQ  |
| lala  | MLEAVAEKLE  | WENP       | .....      | .....      | .....      | .        | EVLQTIKGS   |
| enfa  | LLTTVKEAIG  | WEEV       | .....      | .....      | .....      | .        | EVLREFS GE  |

|           |             |      |       |       |       |              |
|-----------|-------------|------|-------|-------|-------|--------------|
| syne      | LVEKLSETFG  | VKLT | ..... | ..... | ..... | ..VKVTLQGE   |
| arthchl   | LVPALEAKWG  | VKLS | ..... | ..... | ..... | ..ISKTFLLGS  |
| prma      | LISEICEKLD  | REFN | ..... | ..... | ..... | ..VLLDVKGS   |
| mypu      | LLEKVMEIFG  | VQKY | ..... | ..... | ..... | ..KVVDTFKGK  |
| myge      | LFEVFTNKLN  | WTNA | ..... | ..... | ..... | ..IKLKKFKGS  |
| mypn      | LFESLKTTFG  | WTDA | ..... | ..... | ..... | ..IQVQTISGS  |
| urur      | LVETFVKKVG  | FEDY | ..... | ..... | ..... | ..KWIKDFKAN  |
| saty      | LVESVIQRIG  | AAE  | ..... | ..... | ..... | YTILGTVKGA   |
| esco      | LVESVMQRIG  | VTD  | ..... | ..... | ..... | YTILGTVKGA   |
| yepe      | LVESVMKRAG  | ITQ  | ..... | ..... | ..... | WAVLGSTGTS   |
| vich      | LAKSVMDRAG  | IEH  | ..... | ..... | ..... | FHNLGFATGA   |
| hain      | LVESVAKAVG  | IEH  | ..... | ..... | ..... | IEILGSVKGD   |
| acac      | LVEDMVKAVG  | VEK  | ..... | ..... | ..... | VEILGSAK GK  |
| pamu      | LVEEVAKAAG  | VEQ  | ..... | ..... | ..... | VVILGESK GK  |
| psae      | LVESCLARYQ  | REG  | ..... | ..... | ..... | ..KVVATAKGE  |
| psfl_1    | MVESCLARYE  | LQG  | ..... | ..... | ..... | ..SVIATATGS  |
| xyfa      | LAAKALARYG  | IAE  | ..... | ..... | ..... | LLIHGSAKGA   |
| neme      | LAEDALKRYG  | FSDG | ..... | ..... | ..... | IAILAETTD    |
| buAPS     | LVEKTLNNTLK | IKK  | ..... | ..... | ..... | SIIRNYVKGR   |
| agtu      | LADEAAAKAK  | LTFK | ..... | ..... | ..... | ..FVRDVKSE   |
| sime      | LADESAAKAK  | VTFN | ..... | ..... | ..... | ..FVRDIEAG   |
| melo      | LAAESQAKAK  | ITLK | ..... | ..... | ..... | ..RLHHVSAE   |
| cacr      | LAEDVFKAAG  | VAS  | ..... | ..... | ..... | ..WKTVEAV    |
| hepy26695 | LHEKLAALGV  | VDN  | ..... | ..... | ..... | ..EITHEFNSN  |
| hepyj99   | LHEKLAALGV  | VDN  | ..... | ..... | ..... | ..AITHEFNSN  |
| caje      | LLKSMVEKGL  | TSG  | ..... | ..... | ..... | ..EIQKELNAK  |
| thma      | LLDAFSKETG  | IDCS | ..... | ..... | ..... | ..NVVEKIKGK  |
| fepe      | LLQKFAADVG  | IDF  | ..... | ..... | ..... | ..EVVEKFV GK |
| aqae      | LMDKFFETVN  | RPEG | ..... | ..... | ..... | ..LVLETVKGK  |

551 600

|       |            |            |       |         |            |                   |
|-------|------------|------------|-------|---------|------------|-------------------|
| mask  | *****      | *          | ..... | .....   | .....      | *****             |
| stau2 | NLNLNKYIPP | FE         | ..... | SDGLVN  | .....      | AYYV VDGEFVTNSE   |
| bace2 | ELVNTSYTAP | FP         | ..... | MKEVTN  | .....      | GYHV IAADFVTADS   |
| baan2 | ELLNISYTAP | FP         | ..... | MKEVTN  | .....      | GYRV IGADFVTADS   |
| ocih  | DLVGINYEAP | FD         | ..... | FISLDN  | .....      | GHYV IGADFVTDTS   |
| clpe  | ELLGMEYEQL | LP         | ..... | FVTPTE  | G.....     | KAFVV VHGDYVTLSD  |
| clac  | KLLGMEYEQL | FK         | ..... | FANPDK  | .....      | KAFYV VHGDYVTLSD  |
| cldi  | DLEGLEYEQL | MP         | ..... | FVEVDK  | .....      | KAFFI TVGDYVTTED  |
| pogi  | ELEGMRYEQL | IP         | ..... | WVNPGE  | G.....     | AFRV ITGDFVTTED   |
| bafr  | DLVGMEYEQL | IP         | ..... | WVNPGE  | G.....     | AFRV ILGDYVTTED   |
| feac  | DLVGTHYEQL | MP         | ..... | FLHVSK  | N.....     | ALQV VPGDFVTAED   |
| thvo  | ELAGKGYEQL | LP         | ..... | FLDPPA  | G.....     | ALRV VTGDFVTDID   |
| thnw  | DLVGKRYLQL | MP         | ..... | FLDPPS  | G.....     | SLKV VAGSFVTTED   |
| cyhu  | DLVGIEYEQL | MP         | ..... | YLPQET  | P.....     | AFRV IAGDFVSTED   |
| chte  | DLEGRDYEPL | FN         | ..... | YFSPER  | R.....     | AWYV VCGDFVSTGE   |
| dera  | DLEWVEYEPP | FPEVASQLGV | VS    | ELHERRD | GK..       | PVLHFV VMADFVSDVD |
| stco  | EMERWTYQRP | F          | ..... | ELVEFPE | P.....     | AHYV VNADYVTTED   |
| thth  | ALEGLPYTPP | YP         | ..... | QALEK   | G.....     | YFV VLADYVSQED    |
| deet  | DLSGLFYKPL | FDPREFGIPV | RN    | MQDNSET | GVSEELLYPV | ITTSYVSMDD        |
| anga  | KLVGVRYEPL | FDYFRK     | ....  | Y...ES  | V.....     | GFRV LTDTYVTEES   |
| drme  | TLKDLHYKPL | FPYFAK     | ....  | RGAEV   | K.....     | AYRV LVDEYVTEES   |



|         |             |            |            |            |             |            |
|---------|-------------|------------|------------|------------|-------------|------------|
| hosa    | YLKGGKYRPL  | FDYFLK.... | ....CK..EN | G.....     | AFTV        | LVDNYVKEEE |
| cael    | QLKDLRYEPL  | FPYFAY.... | ....MRE.ER | N.....     | AFRV        | LNDFVTSDS  |
| asfu    | DMKDWKYQPL  | FDYFYE.... | ....EFK.DH | .....      | GFRV        | INGDYVSAED |
| scpo    | ALDGQKYEPL  | FPYFKS.... | ....TFG.ER | .....      | AFKL        | YSADYVEEGS |
| sace    | DLVGLKYEPL  | FPYFAE.... | ....QFH.ET | .....      | AFRV        | ISDDYVTSDS |
| ledo    | QLVGEKYVPL  | FPYFES.... | ....SMS.AT | .....      | AFRV        | ISGTYVTTDA |
| lema    | QLVGEKYVPL  | FPYFES.... | ....SMS.AT | .....      | AFRV        | ISGTYVTTDA |
| arth    | SLVGKKYEPL  | FDYFS..... | ....DFS.SE | .....      | AFRV        | VADDYVTDDS |
| teth    | ELVGREYEPL  | FPYFLS.... | ....RKQ.DG | .....      | CFRI        | LAGDFVTADA |
| encu    | ELEGLYEYQP  | FDYFEE.... | ....YR..KK | G.....     | FFRV        | LASGFVTDTD |
| nolo    | ELLHLEHDQP  | FMYYNH.... | ....YR..EK | G.....     | FFRV        | YHADVFSEID |
| plfa    | ELKELKYKPL  | FTNFYE.... | ....KHNFKE | R.....     | AYKI        | IADDFVSDDA |
| plyo    | YLNGLKYKPL  | FNHFYE.... | ....KFNFK  | N.....     | AYRI        | LCDEFVTNTV |
| chtr    | SLVQSYEPL   | FPYFQD.... | ....KK..EL | E.....     | AFRI        | LPADFIEESE |
| chmu    | SLVGRRYCPL  | FPYFQD.... | ....QQ..DR | G.....     | AFRV        | IPADFIEESE |
| chpn    | DLVGRTYEPP  | FTFFQS.... | ....KR..EE | G.....     | AFRV        | IAASFVEESE |
| trde    | ELEGLRYEPL  | FPYFKNLAAD | ENGKNAEAGQ | G.....     | AFRV        | LIGDFVTTED |
| trpa    | HLAGIRYRPL  | FSYPVFGQGP | DPSVQGDSEE | G.....     | LFCT        | RVADVFSTED |
| bobu    | KLEGIEYEPI  | FNYFLE.... | .....QKDK  | G.....     | AFKV        | HTADYVTTDD |
| myle    | DLLGRHYLPP  | FQYFYESAR. | .....N.    | .....      | AFQV        | LPGDFVTTDD |
| mytu    | ELLGTRYLPP  | FAYFMDWP.. | .....N.    | .....      | AFQV        | LAGDFVTTDD |
| codi    | ELVGLTYQPI  | FSYFADHE.. | .....N.    | .....      | AFQI        | LAAEYVTTED |
| ripr    | KLQGLSYKPL  | FNYFENHP.. | .....N.    | .....      | SFKI        | FASDFVVEGD |
| rico    | ALQGLNYKSL  | FDYFENHP.. | .....N.    | .....      | SFKI        | FAGDFVVEGD |
| psfl    | ELAGLRYLPV  | VGEVIDAS.. | .....      | .....      | AHRV        | VTADFVQMGD |
| suso    | ELIGIKYEHP  | LREFVS.... | ....AQTKL. | D...DFHQVV | DAGNIVTLTD  |            |
| aepe    | QLEGLRYRHP  | LEDVVD.... | ....AQREL. | S...KWHKV  | MAPEAVTPHE  |            |
| arfu    | DLEGLYEYHP  | LADEVP.... | ....LQK... | ....NWKHQV | FFADVFVAEN  |            |
| meba    | DLTKLEYESP  | VGDLVP.... | ....VQN... | ....EIKHGI | YLADYVTAEN  |            |
| meth    | ELEGLTYRHP  | LDEEVP.... | ....CHR... | ....DMEHRV | ILGDHVTLTE  |            |
| pyho    | ELEGLRYIHV  | LMDEYP.... | ....RQKEF. | REKYEWAHRI | ILADFVTTLEE |            |
| pyfu    | ELEGLRYVHI  | LMDEYP.... | ....RQKEF. | REKYEWVHRV | ILADFVTTLEE |            |
| pyab    | ELEGLRYVHI  | LMDEYP.... | ....RQKEF. | KEYEWAHRV  | ILADFVTTLEE |            |
| meja    | ELEGIKYIHP  | LLEENE.... | ....RQKEF. | AE.LENAHTV | ILGEHVTTLEG |            |
| haNRC   | DLIGWSYTPP  | LADAVP.... | ....ANPTD. | A...DGTHEV | YHGDWVEADR  |            |
| pyba    | ELAGVRYIHP  | LAAEVP.... | ....ERAS.. | ....RPHQV  | VTAEFVTTLEQ |            |
| bacel   | ELEYTVAKHP  | FYDR.....  | .....      | ....DSL    | MLGDHVTTDA  |            |
| baan1   | ELEYTVAKHP  | FYDR.....  | .....      | ....DSL    | MLGDHVTTDA  |            |
| bast    | ELEYVVAKHP  | FYER.....  | .....      | ....DSL    | VCGEHVTTDA  |            |
| basu    | DLENIIEAHP  | LYGR.....  | .....      | ....DSL    | MLGEHVTTDA  |            |
| baha    | DLEYVVAEHP  | IYGR.....  | .....      | ....DSL    | VLGDHVTLDA  |            |
| limo    | ELDRVVTKHP  | FYDR.....  | .....      | ....DSL    | MNGEHATAEA  |            |
| liin    | ELDRVVTKHP  | FYDR.....  | .....      | ....DSL    | MNGEHATAEA  |            |
| stau    | ELEYVVAQHP  | FLDR.....  | .....      | ....ESL    | INGDHVTTDA  |            |
| stpy    | DLEYIVTEHP  | WDTDV..... | .....      | ....EEL    | ILGDHVTTLES |            |
| stmu    | ELDRIVTIHP  | WDDNV..... | .....      | ....EEL    | MNGDHVTTLDS |            |
| stpn    | ELNHIVTEHP  | WDTAV..... | .....      | ....EEL    | ILGDHVTTDS  |            |
| lala    | ELEYMVAKHP  | FYDR.....  | .....      | ....ETL    | MNADYVTTLDS |            |
| enfa    | KLDRMTAQHP  | FYDR.....  | .....      | ....TSL    | MLGDHVTLDA  |            |
| syne    | SLENTCYQHP  | LFDRV..... | .....      | ....SPI    | IGGDYVTTES  |            |
| arthchl | DLENCYRYTHP | IDNRD..... | .....      | ....CPV    | IGGDYITTES  |            |
| prma    | LLEGLYKHP   | TKNKF..... | .....      | ....CNIV   | IGGDYITTES  |            |

|           |             |             |         |            |            |             |
|-----------|-------------|-------------|---------|------------|------------|-------------|
| mypu      | NLLGVEYQRP  | IKTDL.....  | .....   | .....      | FGIV       | VAGYHVSIDA  |
| myge      | NLKNSSYSHC  | FYNK.....   | .....   | .....      | VLPV       | LMGIHVVDNE  |
| mypn      | QLQNTTYKHC  | LYDK.....   | .....   | .....      | VNPV       | LLGNHVLKNE  |
| urur      | TLEKIKYISP  | ISKK.....   | .....   | .....      | HAFV       | IMDEYVSAND  |
| saty      | ELELLRFTHP  | FM.....     | .....   | .....      | GFDVPA     | ILGDHVTLDA  |
| esco      | ELELLRFTHP  | FM.....     | .....   | .....      | GFDVPA     | ILGDHVTLDA  |
| yepe      | DLELLRFTHP  | FM.....     | .....   | .....      | GFDVPA     | ILGDHVTLDA  |
| vich      | DLELVQFQHP  | FY.....     | .....   | .....      | SFTVPA     | ILGDHVTTDS  |
| hain      | DLELSRFHHP  | FY.....     | .....   | .....      | DFTVPV     | ILGDHVTTDG  |
| acac      | DLELFRFHHP  | FY.....     | .....   | .....      | NFTVPI     | ILGDHVTTDG  |
| pamu      | DLEWLRFQHP  | FY.....     | .....   | .....      | DFSVPF     | ILGDHVTTDG  |
| psae      | ALELINFRHP  | FY.....     | .....   | .....      | ERLSPV     | YLADYVALDA  |
| psfl_1    | ALELINFRHP  | FY.....     | .....   | .....      | DRLSPV     | YLADYVELGS  |
| xyfa      | AMEQHILAHF  | FYP.....    | .....   | .....      | DRTIPL     | LLGNHVSAED  |
| neme      | KLENLHMNHP  | FL.....     | .....   | .....      | ERDIPM     | LNGDHVTTDA  |
| buAPS     | FLEKMICLHP  | FLK.....    | .....   | .....      | NIDLPA     | ILGKHVTLES  |
| agtu      | ELAAITCAHP  | LASLG.....  | .....   | .....      | YDFPVPL    | LDGDHVTTDDA |
| sime      | ELAAITCAHP  | LHGLGG..... | .....   | .....      | GYAFSVPL   | LDGEHVTTDDA |
| melo      | QLGNLVLVSHF | FKGLGG..... | .....   | .....      | GYEFPVPM   | VAGDHVTTDDA |
| cacr      | DCEGMVLAHP  | LADLDS..... | .....   | .....      | HYGYAVPM   | LAGDHVTTDDA |
| hepy26695 | DLEYLVATNP  | LN.....     | .....   | .....      | QRDSLVA    | ALGEHVGLED  |
| hepyj99   | DLEYLVATNP  | LN.....     | .....   | .....      | QRDSLVA    | VLGDHVSLED  |
| caje      | EFEKLEAINP  | LN.....     | .....   | .....      | GRKSVL     | IMGEHVLMDG  |
| thma      | DLEGKEFVHP  | IFDD.....   | .....   | .....      | RTSRV      | ILADYVSLET  |
| fepe      | ELEGKLTKHP  | LYD.....    | .....   | .....      | RTSVV      | VLADYVTLED  |
| aqae      | DLVGLEYTHP  | FVEKEKLGKH  | LS..... | EETLKNMWKI | YPSEFVSLDT |             |

601

650

|       |            |            |            |            |             |       |
|-------|------------|------------|------------|------------|-------------|-------|
| mask  | *****      | *****      | .....      | .....      | *****       | ..... |
| stau2 | GTGIVHIAPA | HGEDDYQLV. | LERDLDFLNV | .....      | ITREGVYNDR  |       |
| bace2 | GTGLVHIAPA | YGEDDYRVV. | QSEGLSFLHV | .....      | VDEKGEYTEA  |       |
| baan2 | GTGLVHIAPA | YGEDDYRVV. | QSEGLSFLHV | .....      | VDEKGEYTEA  |       |
| ocih  | GTGIVHLNPA | HGEDDYNAI. | QAKGMDFVNV | .....      | VDSKGRYEDV  |       |
| clpe  | GTGIVHIAPA | YGEDDNLIG. | KQNGLAFLNL | .....      | VDSLGNFVEE  |       |
| clac  | GTGIVHIAPA | YGEDDNMLG. | KKYDLPLINL | .....      | VNGEGKFVDE  |       |
| cldi  | GTGIVHTAPA | FGEDDYNTG. | KRYDLPVIQP | .....      | VDETGKFTS.  |       |
| pogi  | GTGIVHIAPT | FGADDDRVA. | KKSGVPPLML | RDKEGNMRPM | VDLAGRYF.P  |       |
| bafr  | GTGIVHIAPT | FGADDAQVA. | KAAGIPPLQL | VNKKGELRPM | VDLTGKIFY.T |       |
| feac  | GTGIVHAAPA | FGADDFDIA. | KEYNVSLINP | .....      | VDSEGKFDN.  |       |
| thvo  | GSGIVHAAPA | FGSDDYQIG. | KRENVPIINP | .....      | VDKNGRFSDE  |       |
| thnw  | GSGIVHAAPA | FGADDYQIG. | KEEGVEILNP | .....      | VDKNGRFADP  |       |
| cyhu  | GTGIVHIAPT | FGADDARVA. | KLAGIPSIVT | KDDRGNEYPL | VDKRGRFTKE  |       |
| chte  | GTGIVHIAPA | FGADDYELS. | KQYQLPMLQP | .....V     | AR.NGCFAT   |       |
| dera  | GSGVAHEAPA | YGAEDLEVA. | RAYGVPLMFG | .....      | VDDHG..ILQ  |       |
| stco  | GTGLVHQSPA | FGEDDLKVC. | RAYGLPVVNP | .....      | VRPDGTFEED  |       |
| thth  | GTGIVHQAPA | FGAEDLETA. | RVYGLPLLKT | .....      | VDEEG..KLL  |       |
| deet  | GTGIVHTAPA | YGELDYESG. | VKYGLKFVHH | .....      | VDLQGRITGS  |       |
| anga  | GTGVVHQAPY | FGEDDYRVC. | LANGVIK.RD | ...QEIVCP  | VDASGKFVEP  |       |
| drme  | GTGIVHNAPY | FGEDDYRVC. | LAAGLIT.KS | ...SEVLCV  | VDEAGRFTNE  |       |
| hosa  | GTGVVHQAPY | FGAEDYRVC. | MDFNIIR.KD | ...SLPVCP  | VDASGCFTTE  |       |
| cael  | GTGVVHQAPY | FGEIDFQVC. | VANGVIA.KD | ...QKMICV  | VDESGKYTSE  |       |
| asfu  | GTGIVHQSPA | FGEDDYNVA. | MASGVIS.ET | ...RLPPNP  | VDEKGCFTAE  |       |

|         |            |            |            |            |             |
|---------|------------|------------|------------|------------|-------------|
| scpo    | GTGIVHQAPA | FGEADYDAA. | WAAGIID.AD | ....HQPPCP | VDEQGLLTSE  |
| sace    | GTGIVHNAPA | FGEEDNAAC. | LKNGVIS.ED | ....SVLPNA | IDDLGRFTKD  |
| ledo    | GTGIVHQAPA | FGEDDYQAC. | IDAGIFE.KG | ....GKFVCP | VDENGMFTSE  |
| lema    | GTGIVHQAPA | FGEDDYQAC. | IDAGIFE.KG | ....GKFVCP | VDENGMFTSE  |
| arth    | GTGIVHCAPA | FGEDDYRVC. | LLNKIIK.KG | ....ENLVVA | VDDDGLFTE   |
| teth    | GTGIVHCAPG | FGDDDYKVS. | VANNIIK.PD | ....D.PPVP | VDENGHFTNV  |
| encu    | GTGVVHCAPG | FGECDYNAF. | VEKGLIR.EN | ....DLVPCP | VDENGRYTSE  |
| nolo    | GTGVVHCSPG | FGEDDYKAM. | TMPGLIK.EN | ....ELLPSP | LDENGRFNEE  |
| plfa    | GTGIVHCAPS | YGEDDYRVC. | CKYGIIDPES | ....NILIDP | LDWNGYFTNE  |
| plyo    | GTGIVHCAPT | YGEDDFRVC. | EKNKIINPEK | ....SIFIDP | LDSNGYFTNE  |
| chtr    | GTGIVHMAPA | FGEADFFAC. | QEHNVP.... | .....LVCP  | VDNQGCYTAE  |
| chmu    | GTGVVHMAPA | FGEADFFAC. | QEHNVP.... | .....LVCP  | VDNQGCFTSE  |
| chpn    | GTGVVHMAPA | FGEGDFLVC. | KENHVP.... | .....LVCP  | VDAHGSFTEE  |
| trde    | GTGIVHTAPG | FGEDDNRIF. | KDTG.VP... | .....TVCP  | VDAECKFTHE  |
| trpa    | GTGVVHVAPA | FGEDDYEVF. | KDAG.IS... | .....IQCP  | LDAEGRFTAE  |
| bobu    | GTGIVHIAP. | FGEEDYRIL. | KKHTNVD... | .....IIDP  | LDAECKFTNQ  |
| myle    | GTGIVHIAPA | YGEDDMATA. | DKVGIVP... | .....VTP   | VDSNGCFDAT  |
| mytu    | GTGIVHMAPA | YGEDDMVVA. | EAVGIAP... | .....VTP   | VDSKGRFDVT  |
| codi    | GTGIVHQAPA | FGEDDMNTC. | KEYGIEV... | .....VIP   | VDMDGKFTSL  |
| ripr    | GTGIVHMAPG | FGEDDQILC. | ESKGIEL... | .....VCP   | VDNSGKFTKE  |
| rico    | GTGVVHMAPG | FGEDDQILC. | ESKGIEL... | .....VCP   | VDNSGKFTKE  |
| psfl    | GSGIVHIAPA | FGEDDALLG. | QQYELPA... | .....PNP   | VRDDGTFSDA  |
| suso    | GTGLVHSATG | HGEEDFTVG. | QKYGFPVVMF | .....      | VNDRGEFTEE  |
| aepe    | GSGLVHSAPG | HGTIDYEIA. | QRIGAPVVSL | .....      | VDERGFMTEA  |
| arfu    | .TGCVHIAPG | HGVEDYELG. | VEKGLEVFNP | .....      | VDDRGVYTEE  |
| meba    | .TGCVHIAPG | HGMDDFNVG. | VKYNLPIPCP | .....      | VGPNGAYTEE  |
| meth    | GTGCVHTAPG | HGPEDFEIG. | KEYGLPVFCP | .....      | VDEAGVFTED  |
| pyho    | GTGLVHTAPG | HGEEDFEVG. | KKYGLPIYSP | .....      | VDDQGRYVEG  |
| pyfu    | GTGLVHTAPG | HGEEDFEVG. | QKYGLPVYSP | .....      | VDDQGRYVEG  |
| pyab    | GTGLVHTAPG | HGEEDFEVG. | QKYGLPVYSP | .....      | LDDQGRYVEG  |
| meja    | GTGLVHTAPG | HGEEDFEVG. | KKYNLPIYSP | .....      | IDDEGRYVEG  |
| haNRC   | .TGLVHSAPG | HGEEDFERG. | AELDLPVFCP | .....      | VGEDGVYTD   |
| pyba    | GTGLVHIAPG | HGPEDFELA. | KKYGLPVTNS | .....      | VEINGIYNEL  |
| bacel   | GTGCVHTAPG | HGEDDFIVG. | KKYGL..... | .....EVLCP | VDDKGVLTTE  |
| baan1   | GTGCVHTAPG | HGEDDFIVG. | KKYGL..... | .....EVLCP | VDDKGVLTTE  |
| bast    | GTGCVHTAPG | HGEDDFLVG. | QKYGL..... | .....PVLCP | VDERGYMTEE  |
| basu    | GTGCVHTAPG | HGEDDFIIG. | QKYGL..... | .....DVLCP | VDEKGVMTSE  |
| baha    | GTGCVHTAPG | HGEEDYIVG. | QKYGL..... | .....DVLCP | VDDKGYMTAE  |
| limo    | GTGAVHTAPG | HGEDDFLIG. | KKYDL..... | .....EILAP | LDDRGVFTEE  |
| liin    | GTGAVHTAPG | HGEDDFLIG. | KKYDL..... | .....EILAP | LDDRGVFTEE  |
| stau    | GTGCVHTAPG | HGEDDYIVG. | QKYEL..... | .....PVISP | IDDKGVFTEE  |
| stpy    | GTGIVHTAPG | FGEDDYNVG. | TKYKL..... | .....EVAVT | VDERGLMMEN  |
| stmu    | GTGIVHTAPG | FGEDDYNVG. | VKYGL..... | .....DVVVT | VNERGIMMEN  |
| stpn    | GTGIVHTAPG | FGEDDYNVG. | IANNL..... | .....EVAVT | VDERGIMMKN  |
| lala    | GTGLVHVAPG | HGEDDYFAS. | RKYKL..... | .....PVLSP | IDNRGYTDE   |
| enfa    | GTGLVHTAPG | HGEDDYIVS. | RKYDL..... | .....PVISP | VDSRGVFTDE  |
| syne    | GTGLVHTAPG | HGQEDYVVG. | QRYGL..... | .....PILSP | VDAAGNLTEE  |
| arthchl | GTGLVHTAPG | HGQEDYATG. | LKYGL..... | .....PLVSP | VDDEGKFTEE  |
| prma    | GTGIVHTAPG | HGMDDFNVG. | QKYQL..... | .....PITCI | VDEKGNLNKH  |
| mypu    | GTGLVHMAPL | FGEDDFIIG. | QENEL..... | .....DQIMH | INDDGSINSE  |
| myge    | GTGIVHSSPA | FGIDDFYLC. | QKNKIK.... | .....EVLIS | IDDEKGVFNNL |
| mypn    | GTGLVHTSPA | YGLDDFYLC. | KQNKLN.... | .....EALVS | LDEKGVFNDT  |

|           |            |            |            |            |            |            |
|-----------|------------|------------|------------|------------|------------|------------|
| urur      | GTGLVHNAPA | FGLEDYYAC. | KKYGI..... | .....      | ETVVM      | IDQFGKYNAL |
| saty      | GTGAVHTAPG | HGPDDYVIG. | QKYGL..... | .....      | ETANP      | VGPDGAYLPG |
| esco      | GTGAVHTAPG | HGPDDYVIG. | QKYGL..... | .....      | ETANP      | VGPDGTYLPG |
| yepe      | GTGAVHTAPG | HGPDDFVIG. | QKYGL..... | .....      | EVANP      | VGPNGCYLAG |
| vich      | GTGVVHTAPG | HGQEDFAVG. | QQYGL..... | .....      | EVANP      | VGSNGVYLPD |
| hain      | GTGLVHTAPD | HGLDDFIVG. | KQYDL..... | .....      | PMAGL      | VSNDGKFIST |
| acac      | GTGLVHTAPN | HGLDDFIVG. | KQYDL..... | .....      | PMAGL      | VTNDGKFISS |
| pamu      | GTGLVHTAPD | HGHDDYIIA. | QKNGI..... | .....      | EMAGL      | IGNDGLFKAD |
| psae      | GTGIVHSSPA | YGEDDFYTC. | KRYGMS.... | ...NDDILSP | VQSNQVYVDS |            |
| psfl_1    | GTGIVHCSPA | YGVDDFVIC. | KKYGMV.... | ...NDDIINP | VQSNQVYVPS |            |
| xyfa      | GTGAVHTAPG | HGQEDHQVF. | QQYGLLNH.. | ..YSAAELNP | VDARGVYLPD |            |
| neme      | GTGLVHTAPA | HGLEDYAVC. | NKYGI..... | .....      | ELYNP      | VNAEGRYIGE |
| buAPS     | GTGAVHTAPD | HGLEDYIIS. | QKYNL..... | .....      | KTSNI      | VNFKGEYISN |
| agtu      | GTGFVHTAPS | HGREDFDAW. | TNSVRTLEAR | G.IDTKIPFP | VDDAGFYTED |            |
| sime      | GTGFVHTAPS | HGREDFEAW. | MDNVRLLEER | G.ISSTIPFP | VDDAGYFTAD |            |
| melo      | GTGFVHTAPG | HGREDFDAW. | MDAAPQLRAR | G.IDTVIPFT | VDDAGFFTRD |            |
| cacr      | GTGFVHTAPG | HGADDYQVW. | LAHG.....  | ...HREIPDT | VDPDGAYYPH |            |
| hepy26695 | GTGAVHTAPG | HGEEDYYLG. | LRYNL..... | .....      | EVLMS      | VDEKGCYDEG |
| hepyj99   | GTGAVHTAPG | HGEEDYYLG. | LKYHL..... | .....      | EVLMS      | VDEKGCYDEG |
| caje      | GSGLVHTAPG | HGEDDYIAC. | LKYGI..... | .....      | EVLMP      | VDDSGCYDET |
| thma      | GTGCVHIAPG | HGEEDYIYGH | VQYGL..... | .....      | PIVSP      | VDEEGRFTEE |
| fepe      | GTGCVHTAPG | HGEEDYQTG. | LKYNL..... | .....      | PVLSP      | VDDEGRFTKE |
| aqae      | GTGLVHMAPG | HGQEDYVVG. | QRYGL..... | .....      | EPYAP      | VSDEGRFVEP |

651

700

|       |        |            |            |            |            |       |
|-------|--------|------------|------------|------------|------------|-------|
| mask  | .....  | .....**    | *.....     | .....      | .....      | ..... |
| stau2 | F..... | .....PELVG | NKAKNS.... | .....      | .....      | ..... |
| bace2 | V..... | .....PFLKG | KFVKDS.... | .....      | .....      | ..... |
| baan2 | V..... | .....PFLKG | KFVKDC.... | .....      | .....      | ..... |
| ocih  | I..... | .....APLAG | QFVKDS.... | .....      | .....      | ..... |
| clpe  | V..... | .....TPWAG | KFVKKC.... | .....      | .....      | ..... |
| clac  | V..... | .....EPWKG | LFVKKA.... | .....      | .....      | ..... |
| cldi  | .....  | .....TPWEG | RFVMEDG..  | .....      | .....      | ..... |
| pogi  | T..... | .....TDLDP | VFVEKHMDLP | LYDVYAGRYV | KNAYDAGKTE |       |
| bafr  | L..... | .....DELDE | DFIKQRVND  | LYKEYAGRFB | KNAYDPNLS  |       |
| feac  | S..... | .....VPWKD | KFVMD....  | .....      | .....      | ..... |
| thvo  | R..... | .....LPWYG | KKPRE....  | .....      | .....      | ..... |
| thnw  | R..... | .....IPWNG | KFVRD....  | .....      | .....      | ..... |
| cyhu  | V..... | .....TDFAG | EYVKEAYLTD | EEKEAER..V | KQGRDKYLS. |       |
| chte  | V..... | .....PDYEG | MFFKD....  | .....      | .....      | ..... |
| dera  | V..... | .....THEQG | KFFKD....  | .....      | .....      | ..... |
| stco  | V..... | .....PLVGG | VFFKK....  | .....      | .....      | ..... |
| thth  | V..... | .....EPFKG | LYFRE....  | .....      | .....      | ..... |
| deet  | Y..... | .....PF.AG | KFVKE....  | .....      | .....      | ..... |
| anga  | V..... | .....TDFAG | QYVKD....  | .....      | .....      | ..... |
| drme  | A..... | .....SDFEG | QYVKD....  | .....      | .....      | ..... |
| hosa  | V..... | .....TDFAG | QYVKD....  | .....      | .....      | ..... |
| cael  | V..... | .....PDYQG | VYVKD....  | .....      | .....      | ..... |
| asfu  | V..... | .....PDFVG | QHVKA....  | .....      | .....      | ..... |
| scpo  | I..... | .....TDFAG | QYVKD....  | .....      | .....      | ..... |
| sace  | V..... | .....PDFEG | VYVKD....  | .....      | .....      | ..... |
| ledo  | V..... | .....TDFAG | KYVKE....  | .....      | .....      | ..... |

|         |           |       |       |             |       |       |
|---------|-----------|-------|-------|-------------|-------|-------|
| lema    | V.....    | ..... | TDFAG | KYVKE.....  | ..... | ..... |
| arth    | I.....    | ..... | THFSG | RYVKD.....  | ..... | ..... |
| teth    | V.....    | ..... | SDFAG | VYIKE.....  | ..... | ..... |
| encu    | V.....    | ..... | RRYAG | RYVKD.....  | ..... | ..... |
| nolo    | V.....    | ..... | PEYKG | MHVKD.....  | ..... | ..... |
| plfa    | V.....    | ..... | EELKD | MYIKD.....  | ..... | ..... |
| plyo    | I.....    | ..... | KEVEN | MYIKD.....  | ..... | ..... |
| chtr    | V.....    | ..... | KDFVG | EYIKS.....  | ..... | ..... |
| chmu    | V.....    | ..... | TDFVG | EYIKF.....  | ..... | ..... |
| chpn    | I.....    | ..... | PQYQG | QYIKH.....  | ..... | ..... |
| trde    | V.....    | ..... | SDYQG | LFVKD.....  | ..... | ..... |
| trpa    | V.....    | ..... | ADYQG | LFVKA.....  | ..... | ..... |
| bobu    | V.....    | ..... | KDFKG | LFVKD.....  | ..... | ..... |
| myle    | V.....    | ..... | PDYQG | QHVFE.....  | ..... | ..... |
| mytu    | V.....    | ..... | ADYQG | QHVFD.....  | ..... | ..... |
| codi    | V.....    | ..... | PEYQG | QLVFD.....  | ..... | ..... |
| ripr    | I.....    | ..... | PDLEG | VQVFD.....  | ..... | ..... |
| rico    | I.....    | ..... | PDLEG | LQVFD.....  | ..... | ..... |
| psfl    | V.....    | ..... | AQYAG | QNIFE.....  | ..... | ..... |
| suso    | G.....    | ..... | GKYKG | LKVR.....   | ..... | ..... |
| aepe    | A.....    | ..... | GKYSG | LYFRG.....  | ..... | ..... |
| arfu    | A.....    | ..... | GKYAG | KHVK.....   | ..... | ..... |
| meba    | A.....    | ..... | GEYAG | KNVR.....   | ..... | ..... |
| meth    | A.....    | ..... | GKYRG | LFVK.....   | ..... | ..... |
| pyho    | .....     | ..... | KWKG  | IYVK.....   | ..... | ..... |
| pyfu    | .....     | ..... | KWKG  | VYVK.....   | ..... | ..... |
| pyab    | .....     | ..... | KWKG  | IYVK.....   | ..... | ..... |
| meja    | .....     | ..... | KWKG  | VFVK.....   | ..... | ..... |
| haNRC   | G.....    | ..... | GKYAG | AFVR.....   | ..... | ..... |
| pyba    | G.....    | ..... | GRYKG | KHVY.....   | ..... | ..... |
| bacel   | A.....    | ..... | PGFEG | L...F.....  | ..... | ..... |
| baan1   | A.....    | ..... | PGFEG | L...F.....  | ..... | ..... |
| bast    | A.....    | ..... | PGFEG | M...F.....  | ..... | ..... |
| basu    | A.....    | ..... | PGFEG | M...F.....  | ..... | ..... |
| baha    | A.....    | ..... | PGFEG | L...F.....  | ..... | ..... |
| limo    | A.....    | ..... | PGFEG | V...F.....  | ..... | ..... |
| liin    | A.....    | ..... | PGFEG | V...F.....  | ..... | ..... |
| stau    | G.....    | ..... | GQFEG | M...F.....  | ..... | ..... |
| stpy    | AG.....   | ..... | PDFHG | Q...F.....  | ..... | ..... |
| stmu    | AG.....   | ..... | PDFEG | Q...F.....  | ..... | ..... |
| stpn    | AG.....   | ..... | PEFEG | Q...F.....  | ..... | ..... |
| lala    | A.....    | ..... | PGLEG | L...L.....  | ..... | ..... |
| enfa    | A.....    | ..... | PGFEG | I...F.....  | ..... | ..... |
| syne    | A.....    | ..... | GKFAG | LN...V..... | ..... | ..... |
| arthchl | A.....    | ..... | GQFRG | LS...V..... | ..... | ..... |
| prma    | A.....    | ..... | EKFCG | LN...V..... | ..... | ..... |
| mypu    | G.....    | ..... | DEFQG | L...F.....  | ..... | ..... |
| myge    | LND.....  | ..... | KELEN | C...F.....  | ..... | ..... |
| mypn    | LND.....  | ..... | PVLTG | L...F.....  | ..... | ..... |
| urur    | VND.....  | ..... | LELEN | M...F.....  | ..... | ..... |
| saty    | TYPT..... | ..... | LDG   | VN.....     | ..... | ..... |
| esco    | TYPT..... | ..... | LDG   | VN.....     | ..... | ..... |

|           |            |             |            |       |       |
|-----------|------------|-------------|------------|-------|-------|
| yepe      | TYPT.....  | .....LDG    | LF.....    | ..... | ..... |
| vich      | T.EL.....  | .....FAG    | QH.....    | ..... | ..... |
| hain      | T.EF.....  | .....FAG    | KG.....    | ..... | ..... |
| acac      | T.EF.....  | .....FAG    | KG.....    | ..... | ..... |
| pamu      | V.PF.....  | .....FAG    | KG.....    | ..... | ..... |
| psae      | L.PF.....  | .....FGG    | QF.....    | ..... | ..... |
| psfl_1    | L.EF.....  | .....FGG    | QF.....    | ..... | ..... |
| xyfa      | TPPFSE.... | .....LTLAG  | LH.....    | ..... | ..... |
| neme      | TPR.....   | .....VAG    | MR.....    | ..... | ..... |
| buAPS     | THDK.....  | .....LDG    | VN.....    | ..... | ..... |
| agtu      | APGFGPSAEG | GAARVMDDNG  | KK.....    | ..... | ..... |
| sime      | APGFGPDAEG | GAGRVIDDKG  | KK.....    | ..... | ..... |
| melo      | APGFGPDREG | GAARVIDDNG  | KK.....    | ..... | ..... |
| cacr      | VALFAG.... | ..LKVLETEG  | KKVGK..... | ..... | ..... |
| hepy26695 | IIHNQLLD.. | .....ESYLG  | EH.....    | ..... | ..... |
| hepyj99   | IIHNQLLD.. | .....KSYLG  | EH.....    | ..... | ..... |
| caje      | LRAKGLLPS. | ..HLLLEEFIG | LH.....    | ..... | ..... |
| thma      | AGKY.....  | .....KG.    | MF.....    | ..... | ..... |
| fepe      | AGKY.....  | .....EG.    | LK.....    | ..... | ..... |
| aqae      | APEF.....  | .....LIN    | VR.....    | ..... | ..... |

701

750

|       |            |            |            |            |            |
|-------|------------|------------|------------|------------|------------|
| mask  | .....      | .....      | .....      | .....***** | *****      |
| stau2 | .....DIEII | KLLSKKQ... | .....LLYKK | QKYEHNYPHC | WRCGNPLIYY |
| bace2 | .....DVDIV | RYLAKEG... | .....LLYHK | EKYEHSYPHC | WRCDSPLLYY |
| baan2 | .....DVDIV | RYLAKED... | .....LLYHK | EKYEHSYPHC | WRCDSPLLYY |
| ocih  | .....DVDII | KMLAKDG... | .....TLYEK | QKYEHSYPHC | WRCDTPLLYY |
| clpe  | .....DQQIV | DYLKEQN... | .....KLFKA | EKHTHSYPHC | WRCDTPLLYY |
| clac  | .....DPKIL | EYMKENG... | .....TLYKS | EKFTHSYPHC | WRCDTPLLYY |
| cldi  | ....LDVEII | KWLASEN... | .....KLYSK | EKVVHNYPHC | WRCQTPLVYY |
| pogi  | KDETLDELVC | VMLKMQN... | .....RVFRI | EKMTHNYPHC | WRTDKPVLYY |
| bafr  | QDESLDVSIC | MMMKVNN... | .....QAFKI | EKHVHNYPHC | WRTDKPVLYY |
| feac  | ....VNPDI  | GYLKENN... | .....LLFKS | QKIKHTYPFC | YRCGTKLLYY |
| thvo  | ....ANEDII | VYLKNNG... | .....LLIKS | EKYEHSYPFC | YRCDTPLLYY |
| thnw  | ....ANEDII | VYLKKNQ... | .....MLLKS | EKYEHSYPFC | YRCDTPLLYY |
| cyhu  | ....VDERIS | IKLKEAN... | .....RAFKV | EKYEHSYPHC | WRTDKPVLYY |
| chte  | ....ADKPIM | QRLKEEG... | .....KLYRR | ETIQHTYPFS | WRYDVPVIYY |
| dera  | ....ADKGLI | ADMKARG... | .....LMFWA | GTLKHRYPFH | DRTGDPILYF |
| stco  | ....ADEKLT | EDLETRG... | .....LLFKH | IPYEHSYPHC | WRCHTALLYY |
| thth  | ....ANRAIL | RDLRGRG... | .....LLFKE | ESYLHSYPHC | WRCSTPLMY  |
| deet  | ....ADKDIS | RNLKERG... | .....LMFRN | ERMHHTYPFC | WRCDSPLIYY |
| anga  | ....ADKAI  | KLLKERG... | .....RLVLA | SQVKHNYPFC | WRSDTPLIYK |
| drme  | ....SDKQIM | AALKARG... | .....NLVSS | GQVKHSYPFC | WRSDTPLIYK |
| hosa  | ....ADKSII | RTLKEQG... | .....RLLVA | TTFTHSYPFC | WRSDTPLIYK |
| cael  | ....ADKLII | KRLKEMG... | .....NLVRQ | AEVKHSYPFC | WRSDTPLLYK |
| asfu  | ....ADKAI  | KHLKGTG... | .....RLIVD | SQITHSYPFC | WRSDTPLIYR |
| scpo  | ....ADKEII | RSLKASG... | .....HLVKH | SQIFHSYPFC | WRSDTPLIYR |
| sace  | ....ADKLII | KYLTNTG... | .....NLLLA | SQIRHSYPFC | WRSDTPLLYR |
| ledo  | ....ADPEII | KALETKG... | .....HLFHK | ASIVHSYPFC | WRSDTPLIYK |
| lema  | ....ADPEII | KALETKG... | .....HLFHK | ASIVHSYPFC | WRSDTPLIYK |
| arth  | ....ADKDII | EAVKAKG... | .....RLVKT | GSFTHSYPFC | WRSDTPLIYR |
| teth  | ....ADKLIR | KNLKERG... | .....LLLVD | SSFKHNYPC  | WRSDTPLIYK |

|         |             |             |             |             |             |
|---------|-------------|-------------|-------------|-------------|-------------|
| encu    | ....CDKAIL  | SDIR..D...  | .....KVL MN | QRIVHKYPFC  | WRS DTPLLYK |
| nolo    | ....ADQSII  | KDLG..K...  | .....KILYE  | GKVYHRY PFC | WRS DTPLIYK |
| plfa    | ....ADNVIK  | KKLKENN...  | .....RLMSN  | NTIVHSYPFC  | WRS DTPLIYR |
| plyo    | ....ADIVIK  | KILKEQN...  | .....RLLSN  | NMIVHSYPFC  | WRS DTPLIYR |
| chtr    | ....ADKGIA  | RRLKNEN...  | .....KLFYQ  | GTVRHRY PFC | WRTDSPLIYK  |
| chmu    | ....ADKGIA  | RRLKNEN...  | .....KLFYQ  | GTIRHRY PFC | WRTDSPLIYK  |
| chpn    | ....ADKEII  | KFLKKEG...  | .....RIFYH  | GTVKHRY PFC | WRTDTPLIYK  |
| trde    | ....ADKQIM  | ERLKTEG...  | .....KLFKK  | AQILHSYPHC  | WRCSSPLIYR  |
| trpa    | ....ADKAI I | ARVQKQG...  | .....ALFRR  | EQISHAYPHC  | WRCASPLIYR  |
| bobu    | ....ADKKII  | ENLKL RN... | .....FLFKR  | ENYLHRY PFC | YRTNCPIIYR  |
| myle    | ....ANAQII  | RDLKNQSGSA  | AVNGAVLLRH  | ETYEHPYPHC  | WRCRNPLIYR  |
| mytu    | ....ANAQIV  | RDLKTQSGPA  | AVNGPVLIRH  | ETYEHPYPHC  | WRCRNPLIYR  |
| codi    | ....ANKSII  | ADLKAAG...  | .....RVVRH  | QTIEHSYPHS  | WRS GEPLIYM |
| ripr    | ....ANDKII  | IKLKEQG...  | .....NWIKT  | EQYIHNYPHC  | WRTDTPLIYK  |
| rico    | ....ANDKII  | IKLKEQG...  | .....NWLKT  | EQYIHNYPHC  | WRTDTPLIYK  |
| psfl    | ....ATPRIL  | ADLKSSG...  | .....LLFKQ  | EQIEHNYPHC  | WRC DNPLIYR |
| suso    | ...DASKAI I | SDLKSKN...  | .....TLFFE  | GKIVHRY PVC | WRCKTPLL LR |
| aepe    | ...EANKAI V | EDLRARG...  | .....ALFHA  | ATIVHRY PVC | WRCKTPLL LR |
| arfu    | ...EANDDII  | DDL YRKD... | .....LLLAE  | ERIVHRY GHC | WRCKTPIIYR  |
| meba    | ...EANPIVI  | EDLRKRN...  | .....RLLAE  | GTVTHRY GHC | WRCKTPIIYL  |
| meth    | ...DADSDII  | DDLRSKN...  | .....LLLRA  | ETISHRY GFC | WRCKTPIIYL  |
| pyho    | ...EADPQII  | EHLKEKG...  | .....YLVKA  | GEIEHKYPHC  | WRCKTPLIFR  |
| pyfu    | ...EADPQII  | EHLKEKG...  | .....YLVKA  | GEIEHKYPHC  | WRCKTPLIFR  |
| pyab    | ...EADPKII  | EHLREKG...  | .....YLVKA  | GEIEHKYPHC  | WRCKTPLIFR  |
| meja    | ...DADAEII  | ETLKNKG...  | .....LLVYA  | GKIKHSYPHC  | WRCKTPLLFR  |
| haNRC   | ...DANDDII  | ADLEARD...  | .....AMLAS  | QTVEHSYGHC  | WRC DTGIIQI |
| pyba    | ...DVDKEVT  | RDLRSKG...  | .....LLVFE  | EKIRHEYPHC  | WRC GSKLILR |
| bacel   | .YDKANKPIT  | EKLEEVG...  | .....ALLKL  | TFITHSYPHD  | WRTKKPIIFR  |
| baanl   | .YDKANKPIT  | EKLEEVG...  | .....ALLKL  | TFITHSYPHD  | WRTKKPIIFR  |
| bast    | .YEDANKAIT  | QKLEEVG...  | .....ALLKL  | GFITHSYPHD  | WRTKQPTIFR  |
| basu    | .YDDANKAIT  | QQLDEKG...  | .....ALVKL  | EFITHSYPHD  | WRTKKPTIFR  |
| baha    | .YDEANKPIT  | QKLDECG...  | .....ALLKL  | TFITHSYAHD  | WRTKKPVIYR  |
| limo    | .YDTANKMVT  | EKLEEVG...  | .....ALLKM  | EFITHSYPHD  | WRTKKPVIIFR |
| liin    | .YDTANKMVT  | EKLEEVG...  | .....ALLKM  | EFITHSYPHD  | WRTKKPVIIFR |
| stau    | .YDKANKAVT  | DLLTEKG...  | .....ALLKL  | DFITHSYPHD  | WRTKKPVIIFR |
| stpy    | .YNKVTPIVI  | DKLG..D...  | .....LLLAQ  | EVINHSYPFD  | WRTKKPIIWR  |
| stmu    | .YDKVLPTVK  | EKLG..D...  | .....LLLAS  | EVITHSYPFD  | WRTKKPIIWR  |
| stpn    | .YEKVPTVI   | EKLG..N...  | .....LLLAQ  | EEISHSYPFD  | WRTKKPIIWR  |
| lala    | .YDEGNKVVS  | KWLEEKD...  | .....ALLKL  | EFFTHSYPHD  | WRTKKPVIIFR |
| enfa    | .YDKANPMIT  | ELLEEKG...  | .....ALLKL  | DFFTHSYPHD  | WRTKKPVIYR  |
| syne    | .LNDANEAI I | NALQDQK...  | .....VLLKE  | EAYEHKYPYD  | WRTKKPTIFR  |
| arthchl | .LGEGNTAVV  | SYLDENM...  | .....SLVME  | ESYAHKYPYD  | WRTKKPTIFR  |
| prma    | .LKDANDLII  | EDLEKNN...  | .....LLLLK  | ENYKHRY PYD | WRTKKPTIFR  |
| mypu    | .YSSANIKIK  | EFLEKND...  | .....KVMFF  | EYFTHSYPHD  | WRTKKPIIFR  |
| myge    | .YLKANDLII  | NRLKQNN...  | .....SFIFS  | EVISHREPHD  | WRS KTPVIYR |
| mypn    | .YLKANDVII  | ERLKQHH...  | .....NFVFS  | ESFLHREPHD  | WRS KTPVIYR |
| urur    | .YEDANQVIL  | NRLMNEH...  | .....LLIHH  | EVITHSVAHD  | WRTKKPVMYR  |
| saty    | .VFKANDIVI  | ELLKEKG...  | .....ALLHV  | EKMQHSYPCC  | WRHKTPIIFR  |
| esco    | .VFKANDIVV  | ALLQEKG...  | .....ALLHV  | EKMQHSYPCC  | WRHKTPIIFR  |
| yepe    | .VFKANDVVV  | ELLREKG...  | .....ALLHV  | EKLLHSYPCC  | WRHKTPIIFR  |
| vich    | .VFKANDSVL  | EVLKEKG...  | .....ALLHH  | HAYEHSYPHC  | WRHKTPIIFR  |
| hain    | .VFEANPLVI  | EKLQEVG...  | .....NLLKV  | EKIKHSYPHC  | WRHKTPIIFR  |

|           |             |            |            |            |            |
|-----------|-------------|------------|------------|------------|------------|
| acac      | .VFEANPLVI  | EKLQETG... | .....NLLKL | DKIKHSYPHC | WRHKTPIIFR |
| pamu      | .VFESNDLVV  | AKLQEVG... | .....AMLKF | SKIKHSYPHC | WRHKTPIIFR |
| psae      | .IWKANPNVV  | AKLEEVG... | .....SLLAH | ETINHSYMH  | WRHKTPLIYR |
| psfl_1    | .IFKADQPII  | EKLREVG... | .....ALMQT | AAIQHSYMH  | WRHKTPLIYR |
| xyfa      | .IWKANPLIV  | DALRLRG... | .....VLLAA | AEMHHSYPHC | WRHKTPIVFR |
| neme      | .VWEANPVIL  | QWLEETG... | .....NLLAS | SKIEHSYAH  | WRHKTPLIYR |
| buAPS     | .VLEANSIII  | ELLIKNN... | .....TFFHH | ESLIHSYPHC | WRHKSPVIYR |
| agtu      | ..GDANERVI  | KALIAAN... | .....NLFAR | GRLKHSYPHS | WRSKKPVIFR |
| sime      | ..GDANERVI  | KALIGRH... | .....ALFAR | GRLKHSYPHS | WRSKKPVIFR |
| melo      | ..GNANQAVI  | DELIKRN... | .....ALFAR | GRLKHSYPHS | WRSKKPVIFR |
| cacr      | .FGPANGAVM  | EKLIEAG... | .....NLLAR | GRVEHSYPHS | WRSKAPVIFR |
| hepy26695 | .VFKAQKRII  | EQLGDS.... | .....LLEL  | QEIEHSYPHC | WRTHKPVIYR |
| hepyj99   | .IFKAQKRII  | EQLGDS.... | .....LLEL  | REIEHSYPHC | WRTHKPVIYR |
| caje      | .IFKANEEKIL | ELLGEG.... | .....LLHS  | SKFIHSYFPC | WRTHKPVIYR |
| thma      | .IEDANEVII  | EDLKRKG... | .....ILVHA | SSITHSYPH  | WRCKGPVIFR |
| fepe      | .IWDANKVIV  | EDLKNGG... | .....SLIKA | GKISHSYPH  | WRCKGPVMFR |
| aqae      | .VFDANHLIV  | GVLKEKG... | .....FLVHE | EKIRHSYPHC | WRCKNPVIFR |

751

800

|       |            |        |            |            |            |
|-------|------------|--------|------------|------------|------------|
| mask  | *****      | .....  | .....***** | .....***** | *****      |
| stau2 | AMEGWFIKTT | N..... | ..FKNEII.N | NNNNIEWFPS | HIKEGRMGNF |
| bace2 | AGESWLIRTT | A..... | ..IKDTFL.Q | NNDTVTWYPD | HMKHGRFGKF |
| baan2 | AGESWLIRTT | A..... | ..IKDTFL.Q | NNDTVTWYPD | HMKHGRFGKF |
| ocih  | AMEGWFIKTT | A..... | ..VKERMQ.E | NNQSVWFN   | HMRDGRFGNF |
| clpe  | PKESWFVAMT | T..... | ..LRDKLL.A | NNEKINWYPD | NIKNGRFGKF |
| clac  | PRDSWFVRMT | S..... | ..LRDKLV.E | NNNKIHWYPD | NIRTGRFGKF |
| cldi  | AKPSWYIEMT | K..... | ..LKDKLI.E | NNNGVKWFPS | FVGEKRFGNW |
| pogi  | PLDSWFIRTT | A..... | ..CKEEMI.A | NNGKIYWKPE | STGTGRFGKW |
| bafr  | PLDSWFIRST | A..... | ..CKERMI.E | LNKTINWKPE | STGTGRFGKW |
| feac  | PLDAWFIKVS | T..... | ..IRELLK.K | NNDKVNWYPE | YKLDGRFGNF |
| thvo  | PLDAWFIRVS | S..... | ..VRDKLV.E | NNEKIRWKPD | YKLGHRFGNF |
| thnw  | PLDAWFIAMS | R..... | ..IRDKLV.E | YNERINWKPD | YKLGHRFGNF |
| cyhu  | PLDSWFIKTT | A..... | ..KKERLV.E | LNKTINWKPE | STGVGRFGNW |
| chte  | ARESWYIRTT | D..... | ..IAPRMV.A | LNKTINWNPP | EIGTGRFGNW |
| dera  | AKKGWYIRTS | Q..... | ..VAGEML.A | QNEKINWVPG | NIKHGRFGNW |
| stco  | AQPSWYIRTT | A..... | ..IKDRLL.Q | ENEKTNWFPD | AVKHGRYGDW |
| thth  | ATESWFIKNT | L..... | ..FKDELI.R | NNQEIHWVPP | HIKEGRYGEW |
| deet  | AKQSWYIRTT | A..... | ..VRDELI.K | GNQQINWYPE | HIKDGRFGDW |
| anga  | AVPSWFVRVE | H..... | ..MNKQLL.N | CSSQTYWVPE | YVKEKRFGNW |
| drme  | AVPSWFVRVE | H..... | ..MSKNLL.D | CSSQTYWVPD | FVKEKRFGNW |
| hosa  | AVPSWFVRVE | N..... | ..MVDQLL.R | NNDLCYWVPE | LVREKRFGNW |
| cael  | AVPSWFINVE | T..... | ..LIPRLL.A | NNDETYWVPA | FVKEKRFANW |
| asfu  | AVPSWFVKIG | P..... | ..IIPQML.Q | GIEESHWVPS | FVKERRFASW |
| scpo  | AVPSWFVRVK | E..... | ..ITNEMV.E | NVMSTHWVPQ | NIRDKRFANW |
| sace  | SVPAWFVRVK | N..... | ..IVPQML.D | SVMKSHWVPN | TIKEKRFANW |
| ledo  | AVESWFVNVE | A..... | ..FRDRLI.D | CNDKTYWVPD | FVKTRRFSNW |
| lema  | AVESWFVNVE | A..... | ..FRDRLI.D | CNDKTYWVPD | FVKTRRFSNW |
| arth  | AVPSWFVRVE | Q..... | ..LKEKLL.K | SNEQTEWVPG | YVKDKRFHNV |
| teth  | AVHCWFIKVT | A..... | ..LKDDLL.A | NNKKAYWVPK | FAQEGRFNNW |
| encu  | LVPNWFVKVK | D..... | ..HVDSLL.R | NNEKINWVPP | DIKYKRFHNV |
| nolo  | LVPNWFVRVK | R..... | ..EIPRLL.E | SNSTINWIPE | SIGEHKFKNW |
| plfa  | AIPAWFVRVS | N..... | ..STNKLV.E | NNETTYWIPA | HVKEKKFHNW |



|         |            |            |              |            |            |
|---------|------------|------------|--------------|------------|------------|
| plyo    | AIPAWFVRVN | N.....     | ..YTDKLV.K   | NNDTTYWIPA | HVKEKKFHNW |
| chtr    | AVNSWFVAVE | K.....     | ..VKSKML.K   | ANESIHWTPE | HIKQGRFGKW |
| chmu    | AVNSWFVSVE | K.....     | ..VKHKML.K   | ANESIHWTPG | HIKHGRFGKW |
| chpn    | AVNSWFVAVE | K.....     | ..IKDKML.R   | ANSSIHWVPE | HIQEGRFGKW |
| trde    | AVASWFVSVT | K.....     | ..IKDKLL.N   | ANSKINWQPD | HIKTGRFGKW |
| trpa    | AVHSWFVAVE | K.....     | ..IKDKML.A   | ANASICWQPS | HIRDGRFGKW |
| bobu    | PISSWFVNVE | K.....     | ..IKTKLL.E   | VNEKINWMPA | HLKKGRFGKW |
| myle    | AVSSWFVAVT | E.....     | ..FRDRMV.E   | LNQQITWYPE | HVKDGOFGKW |
| mytu    | SVSSWFVRVT | D.....     | ..FRDRMV.E   | LNQQITWYPE | HVKDGOFGKW |
| codi    | ALPSWFVEVT | K.....     | ..IRDRMV.E   | LNKEIDWMP  | HIRDGOFGKW |
| ripr    | AVPSWYVRVT | K.....     | ..FKDRMV.E   | LNQQINWIPH | NVKDNLFQKW |
| rico    | AVPSWYVKVT | Q.....     | ..FKDRMV.E   | LNQQINWIPF | HVKDNLFQKW |
| psfl    | AVESWFIRAS | A.....     | ..LREQLV.E   | NNSQVNWVPE | HVKEGRFGDW |
| suso    | AIDQWFIRVT | K.....     | ..IKDKML.N   | EIEKVNWIPD | WGK.SRISNM |
| aepe    | ATTQWFVAVT | R.....     | ..LKNQLM.R   | EAEKVEWQPG | WAK.TRFMMN |
| arfu    | ATEQWFIKIS | E.....     | ..LKDEML.E   | EIDKVMWIPE | WAGSARFKDW |
| meba    | ATEQWFLKVT | D.....     | ..IKDKML.E   | AIDAVDWYPE | WAGSARFRTW |
| meth    | ATEQWFLKIT | E.....     | ..IKDKML.S   | ELDRVQWIPS | WAGESRFRNW |
| pyho    | ATDQWFLKVS | K.....     | ..VKDRIIKE   | NDEKVTWYPD | WVK.IRFDNG |
| pyfu    | ATDQWFLKVS | K.....     | ..VKEKIIKE   | NDEKVTWYPE | WVK.IRFDNG |
| pyab    | ATDQWFLKIS | K.....     | ..VKDKIIKE   | NDEKVTWYPD | WVK.IRFDNG |
| meja    | ATEQWFLEIS | K.....     | ..IKDNII.E   | HAKTVQWIPH | WVE.TRYING |
| haNRC   | VTDQWFITIT | D.....     | ..VKDELL.A   | NMDTSEWHPE | WARDNRFRDF |
| pyba    | ADRQWFIAIS | R.....     | ..IRDKMY.A   | ELQKVNVPPT | KLR.DRFDIF |
| bacel   | ATAQWFASIE | A.....     | ..FRKELLEA   | VA.ETKWVPA | WGE.TRLHNM |
| baan1   | ATAQWFASIE | A.....     | ..FRKELLEA   | VA.ETKWVPA | WGE.TRLHNM |
| bast    | ATTQWFASID | K.....     | ..IRNELLQA   | IK.ETKWIPE | WGE.IRIHNM |
| basu    | ATAQWFASIK | D.....     | ..FRSDLLDA   | IK.ETKWVPE | WGE.QRLHNM |
| baha    | ATAQWFASIE | N.....     | ..FRDELLEA   | IQ.EVKWVPE | WGE.TRLYNM |
| limo    | ATAQWFASID | A.....     | ..FRDILLAA   | VK.GVNWTPA | WGE.TRLFNM |
| liin    | ATAQWFASID | A.....     | ..FRDILLAA   | VK.GVNWTPA | WGE.TRLFNM |
| stau    | ATPQWFASIS | K.....     | ..VRQDILDA   | IE.NTNFKVN | WGK.TRIYNM |
| stpy    | AVPQWFASVS | D.....     | ..FRQDILDE   | IE.KTTFHPS | WGE.TRLYNM |
| stmu    | AVPQWFASVS | K.....     | ..FRQDILDE   | ID.KVHFYPA | WGK.TRLYNM |
| stpn    | AVPQWFASVS | K.....     | ..FRQEILDE   | IE.KVKFHSE | WGK.VRLYNM |
| lala    | ATPQWFASID | D.....     | ..FRQNILDE   | VE.RVDWVIP | WGK.TRLFNM |
| enfa    | ATPQWFASIS | K.....     | ..FRQDILDE   | VE.KVDWLIP | WGK.TRLYNM |
| syne    | ATEQWFASVE | G.....     | ..FRDQALKA   | IK.EVTWIPT | QGE.NRITPM |
| arthchl | ATEQWFASVE | G.....     | ..FRTATMDA   | IN.NVKWVPH | QAV.NRISAM |
| prma    | ATEQWFASVE | G.....     | ..FRSSALKA   | IE.DVEWMPK | TGK.KRIYSM |
| mypu    | GTPQWFVSID | K.....     | ..IKPAILKE   | IE.KIEGRPS | WAV.KRLATM |
| myge    | ASKQLFIKTK | S.....     | ..IKKQLKKQ   | IN.QVNFLNS | KNQ.LRLKEM |
| mypn    | ASKQLFIKTK | S.....     | ..IQSKLKRQ   | IK.RVKFVNN | KNK.ERLQEM |
| urur    | ATKQWFVSIE | K.....     | ..ILPNILQT   | LNNDVKSTS  | RGI.ERMHEM |
| saty    | ATPQWFVSMD | KE.....    | ..GLRQQLKE   | IK.GVQWIPD | WGQ.ARIESM |
| esco    | ATPQWFVSMD | QK.....    | ..GLRAQSLKE  | IK.GVQWIPD | WGQ.ARIESM |
| yepe    | ATPQWFISMD | QK.....    | ..GLRKQSLQE  | IK.GVQWIPD | WGQ.ARIETM |
| vich    | ATPQWFVSME | QA.....    | ..GLREQALTA  | IK.GVHWMPD | WGQ.SRIEGM |
| hain    | ATPQWFIGME | TQ.....    | ..GLRQQALGE  | IK.QVRWIPD | WGQ.ARIEKM |
| acac    | ATPQWFIGME | VQ.....    | ..GLRPQALGE  | IK.QVRWIPD | WGQ.ARIEKM |
| pamu    | ATPQWFIGME | KQ.....    | ..GLRQQALSE  | IK.KVRWIPD | WGQ.ARIEKM |
| psae    | ATAQWFVGMD | KQPR..QG.. | ..ASLRERALEA | IT.QTEFVPG | WGQ.ARLHGM |

|           |            |             |             |            |            |
|-----------|------------|-------------|-------------|------------|------------|
| psfl_1    | ATAQWFIGMD | KEPT..SG..  | DTLRVRS LKA | IE.DTKFVPS | WGQ.ARLHSM |
| xyfa      | ATPQWFISME | QA.....     | .ALRSAALKA  | IT.HVTWYPQ | WGQ.ARILSM |
| neme      | ATGQWFIGMD | KAGA..DG..  | KTLRDKAIKA  | VD.DTEFFPS | WGR.ARLEAM |
| buAPS     | ATPQWFIDID | QK.....     | .QLRIKLLQE  | IK.KVRWIPE | WGE.SRIGEM |
| agtu      | NTPQWFVYMD | KELG..DG..  | TTLRSRSLDA  | ID.QTRFVPA | SGQ.NRLRAM |
| sime      | NTPQWFVTMD | KDFG..DG..  | TTLRSRALNA  | ID.ETRFVPG | AGQ.NRLRAM |
| melo      | NTPQWFVYMD | KDLG..DG..  | TTLRSRALKA  | ID.DTRFVPA | AGQ.NRIRAM |
| cacr      | NTPQWFIRMD | HAVDSL DG.. | KTLREVAVQA  | IA.DTAFYPD | GGR.NRIGAM |
| hepy26695 | ATTQWFILMD | EPFIQNDGSQ  | KTLREVALDA  | IE.KVEFVPS | SGK.NRLKTM |
| hepyj99   | ATTQWFILMD | EPFIQNDGSQ  | KTLREVALDA  | IE.KVEFVPS | SGK.NRLKTM |
| caje      | ATKQWFILMD | EPKLQG....  | KTLRECAKEQ  | LL.KTTFYPQ | SGV.KRIGSM |
| thma      | ATEQWFISVD | HN.....     | .NLRQKVLEE  | ID.KVKWIPE | WGR.NRIRSM |
| fepe      | ATPQWFISVD | KN.....     | .NLRGKVLEE  | IK.KVKWYPA | WGE.TRITAM |
| aqae      | ATPQWFIGMD | IEFF...G..  | KTLRQRALEE  | IE.KVKWIPE | YGK.NRIKSM |

801

850

|       |            |            |            |            |       |
|-------|------------|------------|------------|------------|-------|
| mask  | *****      | *****      | **** ..... | .....      | ..... |
| stau2 | LENMVDWNIG | RNRYWGTPLN | VWICND..CN | HEYA.....  | ..... |
| bace2 | LENMVDWNIS | RNRYWGTPLN | VWECES..CD | HQFA.....  | ..... |
| baan2 | LENMVDWNIS | RNRYWGTPLN | VWECER..CD | HQFA.....  | ..... |
| ocih  | LDNMVDWNIG | RNRYWGTPLN | VWVCDD..CD | KQKS.....  | ..... |
| clpe  | LENVIDWGIS | RDRYWGTPPL | IWECE...CG | HREC.....  | ..... |
| clac  | VENVIDWGIS | RDRYWGTPPL | IWQCE...CG | HRDC.....  | ..... |
| cldi  | LENLNDWAIS | RTRYWGTPPL | IWRCE...CG | HTDS.....  | ..... |
| pogi  | LENLQDWNLS | RSRYWGTPPL | IWRTEG..GS | EEIC.....  | ..... |
| bafr  | LENLNDWNLS | RSRYWGTPPL | IWRTEG..NS | DEKC.....  | ..... |
| feac  | LNDAKDWALS | RNRYWGTPLP | IWKCSN...G | HYLEA..... | ..... |
| thvo  | LDEAKDWNLS | RDRFWGTPLP | VWRCRN...N | HVRF.....  | ..... |
| thnw  | LGEAKDWNLS | RDRFWGTPLP | AWRCKN...G | HLVF.....  | ..... |
| cyhu  | LENLVDWNLS | RSRYWGTPPL | IWRSED..GS | EEKC.....  | ..... |
| chte  | LEENKDWALS | RERFWGTPLP | VWVAED..FA | IGDG.....  | ..... |
| dera  | LEGNVDWAIS | RERYWGTPPL | FWQSES...G | QLRV.....  | ..... |
| stco  | LNNNIDWALS | RNRYWGTPLP | IWRCAE...D | HDTV.....  | ..... |
| thth  | LKNLVDWALS | RNRYWGTPLP | IWVCQA..CG | KEEA.....  | ..... |
| deet  | LENNIDWAFS | RERYWGTPVP | IWRCEK..CG | RTEC.....  | ..... |
| anga  | LRDARDWAIS | RNRYWGTPIP | LWISPD..GK | EIVC.....  | ..... |
| drme  | LKEARDWAIS | RNRYWGTPIP | IWRSPS..GD | ETVV.....  | ..... |
| hosa  | LKDARDWTIS | RNRYWGTPIP | LWVSDD..FE | EVVC.....  | ..... |
| cael  | LRDARDWAVS | RNRFWGTPIN | LWVSED..GE | EVVC.....  | ..... |
| asfu  | IQNARDWNIS | RNRFWGTPPL | LWVSDD..FK | EVVA.....  | ..... |
| scpo  | LKNARDWNIS | RNRYWGTPIP | LWVSDD..YE | EVVC.....  | ..... |
| sace  | IANARDWNVS | RNRYWGTPIP | LWVSDD..FE | EVVC.....  | ..... |
| ledo  | LAEARDWNVS | RNRYWGTPMP | VWHSED..WE | EVVC.....  | ..... |
| lema  | LAEARDWNVS | RNRYWGTPMP | VWHSED..WE | EVVC.....  | ..... |
| arth  | LENARDWAIS | RSRFGWTPPL | IWISDD..GE | EVVI.....  | ..... |
| teth  | LQNVSDWCFS | RSRFGWNPPI | IWVSED..FE | EVVC.....  | ..... |
| encu  | LENARDWSIS | RNRFWGTPIP | LWVTEG..YS | DMIC.....  | ..... |
| nolo  | LSEARDWSIS | RNRFWGTPIP | LWHCDG...  | KYIC.....  | ..... |
| plfa  | IKDAKDCWIS | RNRYWGTPIP | IWCDEK..ME | TVIC.....  | ..... |
| plyo  | IKDAKDCWIS | RNRYWGTPIP | IWTDEK..ME | QIIC.....  | ..... |
| chtr  | LEGARDWAIS | RNRYWGTPIP | IWRSDG..G  | ELLV.....  | ..... |
| chmu  | LEGARDWAIS | RNRYWGTPIP | IWRSED..G  | ELLV.....  | ..... |

|         |             |             |            |            |            |
|---------|-------------|-------------|------------|------------|------------|
| chpn    | LEGARDWAIS  | RNRYWGTPIP  | IWKSAD..G  | EILV.....  | .....      |
| trde    | LEGARDWAIS  | RNRYWGNPIP  | IWKCPD..CG | ETIC.....  | .....      |
| trpa    | LVCARDWAIS  | RDRYWGNPLP  | IWRCVH..CG | ATDC.....  | .....      |
| bobu    | LENAKDWASIS | RNRFWGNPIP  | IWICSK..TG | KKIC.....  | .....      |
| myle    | LQGARDWSIS  | RNRYWGTPIP  | VWKSDDPDYP | RIDV.....  | .....      |
| mytu    | LQGARDWSIS  | RNRYWGTPIP  | VWKSDDPAYP | RIDV.....  | .....      |
| codi    | LEGARDWNIS  | RNRYWGSPIP  | VWVSDDENYP | RVDV.....  | .....      |
| ripr    | LENARDWSIS  | RNRFWGTPLP  | VWKSDDPKYP | RIDV.....  | .....      |
| rico    | LENARDWSIS  | RNRFWGTPLP  | VWKSDDPKYP | RIDV.....  | .....      |
| psfl    | IRNARDWAVS  | RNRFWGAPIP  | VWRCD..QCG | TVEV.....  | .....      |
| suso    | VKELRDWVIS  | RQRFWGTPPLP | IWICER..CN | NVMV.....  | .....      |
| aepe    | LRELRDWVIS  | RQRYWGIPLP  | VWRCSS..CG | YEHV.....  | .....      |
| arfu    | VSNAKDWCSIS | RQRYWGIPIP  | VWICEK..CG | EMKV.....  | .....      |
| meba    | VEGARDWCIS  | RQRYWGMPIP  | VWKCKK..CG | KLEV.....  | .....      |
| meth    | IENARDWTIS  | RQRYWGIPIP  | IWVCED..CD | SIHV.....  | .....      |
| pyho    | VRDSGDWVIS  | RQRYWGIPLP  | IWQSED..GE | IYVVGSWREL | VELAVAIEVN |
| pyfu    | VRDSGDWVIS  | RQRYWGIPLP  | IWQSED..GE | IYVVGSWKEL | VELAVAIEVN |
| pyab    | VRDSGDWVIS  | RQRYWGIPLP  | IWQSED..GE | IYVVGSWREL | VELAVAIEVN |
| meja    | VKFVGDWNIS  | RQRYWGIPIP  | VWVCEK..CG | KYIV.....  | .....      |
| haNRC   | VENAPDWNVS  | RQRYWGIPVP  | IWTPED..WS | GDAED..... | .....      |
| pyba    | VQNARDWNIS  | RSRVWGTPPLP | VWRCKK..DG | RILV.....  | .....      |
| bacel   | VRDRGDWCIS  | RQRAWGVPIP  | VFYAENG... | DPII.....  | .....      |
| baan1   | VRDRGDWCIS  | RQRAWGVPIP  | VFYAENG... | DPII.....  | .....      |
| bast    | VRDRGDWCIS  | RQRAWGVPIP  | VFYGENG... | EPII.....  | .....      |
| basu    | VRDRGDWCIS  | RQRAWGVPIP  | VFYAENG... | EPVI.....  | .....      |
| baha    | VRDRGDWCIS  | RQRVWGVPIP  | IFYGENG... | EPII.....  | .....      |
| limo    | VRDRGDWVIS  | RQRAWGVPLP  | IFYAENG... | EAII.....  | .....      |
| liin    | VRDRGDWVIS  | RQRAWGVPLP  | IFYAENG... | EAII.....  | .....      |
| stau    | VRDRGEWVIS  | RQRVWGVPLP  | VFYAENG... | EIIM.....  | .....      |
| stpy    | IRDRGDWVIS  | RQRAWGVPLP  | IFYAEDG... | TAIM.....  | .....      |
| stmu    | IRDRGDWVIS  | RQRAWGVPLP  | IFYAEDG... | TAIM.....  | .....      |
| stpn    | IRDRGDWVIS  | RQRAWGVPLP  | IFYAEDG... | TAIM.....  | .....      |
| lala    | VRDRGDWVIS  | RQRAWGVPLP  | IFYGENG... | EPII.....  | .....      |
| enfa    | IRDRGDWVIS  | RQRAWGVPLP  | IFYAENG... | EAII.....  | .....      |
| syne    | VGDRSDWCIS  | RQRAWGVPIP  | VFYDEET..S | EPLL.....  | .....      |
| arthchl | TSSRSWDCIS  | RQRTWGVPIP  | AFYHVKT..K | EPLM.....  | .....      |
| prma    | VVGRGDWCIS  | RQRSWGVPIP  | VFYEKEG..K | GVLI.....  | .....      |
| mypu    | IENRKTWTIS  | RQRSWGVPIP  | IFYNEKN... | EIVN.....  | .....      |
| myge    | LLQRDEWCIS  | RQRVWGLPIP  | IVYANNK... | .PLL.....  | .....      |
| mypn    | LLQRAEWCIS  | RQRVWGLPIP  | LIYADNQ... | .PLL.....  | .....      |
| urur    | IVNRKEWCIS  | RQRVWGVPIP  | MIFDENH..N | .AIM.....  | .....      |
| saty    | VANRPDWCIS  | RQRTWGVPM   | LFVHKET..Q | ELLPI..... | .....      |
| esco    | VANRPDWCIS  | RQRTWGVPM   | LFVHKET..E | ELHP.....  | .....      |
| yepe    | VANRPDWCIS  | RQRTWGVPM   | LFVHKET..E | QLHP.....  | .....      |
| vich    | VAGRPEWCIS  | RQRTWGVPIA  | LFVHKET..A | ELHP.....  | .....      |
| hain    | VENRPDWCIS  | RQRTWGVPM   | LFVHKET..E | ELHP.....  | .....      |
| acac    | VENRPDWCIS  | RQRTWGVPM   | LFVHKET..E | ELHP.....  | .....      |
| pamu    | VENRPDWCIS  | RQRTWGVPIA  | LFVHKET..E | ELHP.....  | .....      |
| psae    | IAGRPDWCIS  | RQRNWGVPIP  | FFLHKAS..G | ELHP.....  | .....      |
| psfl_1  | IANRPDWCIS  | RQRNWGVPIP  | FFLNKES..G | ELHP.....  | .....      |
| xyfa    | IENRPDWTIS  | RQRTWGVPIP  | LFVHRHS..G | APHP.....  | .....      |
| neme    | IEGRPDWVVS  | RQRYWGTPMT  | FFVHKET..G | ELHP.....  | .....      |

|           |            |             |            |           |       |
|-----------|------------|-------------|------------|-----------|-------|
| buAPS     | IKKRPDWCIS | RQRKVGVPMS  | IFIHKNT..R | KIHP..... | ..... |
| agtu      | IEGRPDWVLS | RQRSWGVPIA  | VFADDE...G | EVLV..... | ..... |
| sime      | IEQRPDWVLS | RQRAWGVPIA  | IFADDE...G | EILV..... | ..... |
| melo      | IEERPDWVLS | RQRAWGVPIA  | VFADDE...G | NVLK..... | ..... |
| cacr      | VETRPDWLIS | RQRNWGTPLA  | MFVDKHT..G | HPLN..... | ..... |
| hepy26695 | IENRPDWCLS | RQRKVGVPPLA | FFIDKRT..N | KPCF..... | ..... |
| hepyj99   | IENRPDWCLS | RQRKVGVPPLA | FFIDKRT..N | KPCF..... | ..... |
| caje      | VENRPDWCIS | RQRDWGTPIA  | FFRDKNT..K | EVIF..... | ..... |
| thma      | VEERPDWCIS | RQRVWGTPIP  | AVKCKEC..G | EVVL..... | ..... |
| fepe      | VQERPDWTIS | RQRVWGVPIP  | AVKCKDC..G | EVTL..... | ..... |
| aqae      | VENRPDWCIS | RQRFWGVPIA  | VFYCENC..G | EIIK..... | ..... |

851

900

|       |            |            |            |            |            |
|-------|------------|------------|------------|------------|------------|
| mask  | ....*****  | .....      | .....      | .....      | .....      |
| stau2 | ...PSSIKDL | QNNSIN.... | ...KIDED.  | .....      | ...IELHR   |
| bace2 | ...PKSIADL | RKHSTK.... | ...ETPED.  | .....      | ...LELHK   |
| baan2 | ...PKSIADL | RKHSMK.... | ...ETPED.  | .....      | ...LELHK   |
| ocih  | ...PHSIQEL | RAFADS.... | ...DVPED.  | .....      | ...IELHK   |
| clpe  | ...IGSIEEL | KTKGIN.... | ...VPED.   | .....      | ...IELHK   |
| clac  | ...VGSIEEL | KEKGIN.... | ...VPEN.   | .....      | ...IELHK   |
| cldi  | ...VGSRAEL | AEKAIED... | ...VNPET.  | .....      | ...VELHR   |
| pogi  | ...IGSVEEL | YNEIEKAVKA | GMMERNPWA. | .GFKPGVYTE | ENYAKIDLHR |
| bafr  | ...IESVEEL | YNEIEKSVAA | GYMQSNPYKD | KGFVPGEYNE | ENYNKIDLHR |
| feac  | ...VGSREDI | EKHGGN.... | ...IPD..   | .....      | ...DLHR    |
| thvo  | ...IGSRKEI | EEMGAT.... | ...VPQ..   | .....      | ...DLHR    |
| thnw  | ...VGSRKEI | EDLGGK.... | ...VPE..   | .....      | ...DLHR    |
| cyhu  | ...IGSIEEL | KTEIAKAQKA | GIETATDIK. | .....      | ...DLHR    |
| chte  | ...PDSGKLF | AVGSVAELRE | GFIEIDGEE. | ..MNLGDALD | KGLVELDLHK |
| dera  | ...IGSVAEL | SELAGRD... | ...LSD..   | .....      | ...LDLHR   |
| stco  | ...VGSRAEL | TELSGTD... | ...QSS..   | .....      | ...LDPHR   |
| thth  | ...IGSFQEL | KARATKP... | ...LPEP.   | .....      | ...FDPHR   |
| deet  | ...VGGIDEL | KAKPNFKG.. | ...MQEK.   | .....      | ...LDIHR   |
| anga  | ...VGSIDEL | ERYSGVR... | .....      | .....      | ...VTDLHR  |
| drme  | ...IGSIKQL | AELSGVQ... | .....      | .....      | ...VEDLHR  |
| hosa  | ...IGSVAEL | EELSGAK... | .....      | .....      | ...ISDLHR  |
| cael  | ...VGSIAEL | EELSGQK... | .....      | .....      | ...ITDLHR  |
| asfu  | ...VGSVEEL | KQLSGHEGE. | .....      | .....      | ...ITDLHR  |
| scpo  | ...IGSIKEL | EELSGVS.N. | .....      | .....      | ...ITDIHR  |
| sace  | ...VGSIKEL | EELTGVR.N. | .....      | .....      | ...ITDLHR  |
| ledo  | ...VSSTKQL | EELSGVTG.. | .....      | .....      | ...ITDIHR  |
| lema  | ...VSSTKQL | EELSGVTG.. | .....      | .....      | ...ITDIHR  |
| arth  | ...MDSVEKL | EKLSGVK... | .....      | .....      | ...VFDLHR  |
| teth  | ...IGSVEEL | KKLTGAT.E. | .....      | .....      | ...ITDLHK  |
| encu  | ...IGSVGEL | EELSGRK... | .....      | .....      | ...IDDIHR  |
| nolo  | ...IGSIEEL | SRLSGRK... | .....      | .....      | ...IDDIHR  |
| plfa  | ...VESIKHL | EELSGIKN.. | .....      | .....      | ...INDLHR  |
| plyo  | ...IESIKQL | ETLSGVTN.. | .....      | .....      | ...ISDLHR  |
| chtr  | ...IGSIQEL | EALSGQK... | .....      | .....      | ...IVDLHR  |
| chmu  | ...IRSIQEL | EELSGQK... | .....      | .....      | ...IVDLHR  |
| chpn  | ...VGSIREL | EELTGTQ... | .....      | .....      | ...ITDIHR  |
| trde  | ...VGSREEL | KELSGVF... | .....      | .....      | ...PEDMHK  |
| trpa  | ...IGSRTQL | YERSGML... | .....      | .....      | ...LEDLHK  |

|         |          |          |             |       |        |       |           |
|---------|----------|----------|-------------|-------|--------|-------|-----------|
| bobu    | ...      | IGSKKEL  | ENLSGQK...  | ..... | .....  | ..... | IEDLHK    |
| myle    | ...      | YGSLEDEL | ERDFGVR...  | ..... | .....  | ..... | PTNLHR    |
| mytu    | ...      | YGSLEDEL | ERDFGVR...  | ..... | .....  | ..... | PANLHR    |
| codi    | ...      | YGSLEEL  | ERDFGVR...  | ..... | .....  | ..... | PESLHR    |
| ripr    | ...      | YGSIEEI  | EKDFGVK...  | ..... | .....  | ..... | INDLHR    |
| rico    | ...      | YGSIEEL  | EKDFGVK...  | ..... | .....  | ..... | VTDLHR    |
| psfl    | ...      | MGSIAQI  | EARSGRK...  | ..... | .....  | ..... | VEDLHV    |
| suso    | ...      | VGSKEEL  | ESIAIDP...  | ..... | VPND.  | ..... | LHR       |
| aepe    | ...      | VGSVEEL  | ESMGGR...   | ..... | RPEN.  | ..... | LHR       |
| arfu    | ...      | VGSINEI  | EWEN.....   | ..... | DLD... | ..... | LHR       |
| meba    | ...      | IGTKAEL  | LEKSGAGS..  | ..... | DVE... | ..... | LHR       |
| meth    | ...      | VGSIGEL  | RELAVEG...  | ..... | QLEG.. | ..... | DFIHR     |
| pyho    | GERIDLPE | SY       | EEKLKVIE..  | ..... | EKLG.  | ..... | EDLHR     |
| pyfu    | GERIDLPE | SY       | EEKLKVIE..  | ..... | EKLG.  | ..... | EDLHR     |
| pyab    | GERIELPE | SY       | EEKLKVIE..  | ..... | EKLG.  | ..... | EDLHR     |
| meja    | ...      | VGSVEEL  | EEKMINKD..  | ..... | EVGEI. | ..... | NDLHK     |
| haNRC   | VLVVGTR  | EEL      | AALADQDV..  | ..... | DPAS.. | ..... | VDLHK     |
| pyba    | ...      | IGSLEEL  | KKLAKELP..  | ..... | PVDDF. | ..... | KLVHR     |
| bacel   | .....    | TDETI    | NHVADLFR..  | ..... | .....  | ..... | EHGSNVWFE |
| baan1   | .....    | TDETI    | NHVADLFR..  | ..... | .....  | ..... | EHGSNVWFE |
| bast    | .....    | TDETI    | EHVSNLFR..  | ..... | .....  | ..... | QYGSNVWFE |
| basu    | .....    | TDETI    | EHVSE LFR.. | ..... | .....  | ..... | QHGSNIWFE |
| baha    | .....    | TDETI    | NHVSE LFR.. | ..... | .....  | ..... | KHGSNVWFE |
| limo    | .....    | TDETI    | NHISE LFR.. | ..... | .....  | ..... | EHGSNVWFE |
| liin    | .....    | TDETI    | NHISE LFR.. | ..... | .....  | ..... | EHGSNVWFE |
| stau    | .....    | TKETV    | NHVADLFA..  | ..... | .....  | ..... | EHGSNIWFE |
| stpy    | .....    | TKEVT    | DHVADLFQ..  | ..... | .....  | ..... | ENGSIIWQ  |
| stmu    | .....    | TKEVT    | DHIANLFE..  | ..... | .....  | ..... | EHGSVIWQ  |
| stpn    | .....    | VAETI    | EHVAQLFE..  | ..... | .....  | ..... | EYGSSIWWE |
| lala    | .....    | TPETT    | EHVAKLFA..  | ..... | .....  | ..... | EFGSKVWFE |
| enfa    | .....    | TPETI    | EHVANLFA..  | ..... | .....  | ..... | EHGSNIWFM |
| syne    | .....    | TEETI    | NHVQQIIA..  | ..... | .....  | ..... | EKGSDAWWE |
| arthchl | .....    | NEETI    | NHVKSIIS..  | ..... | .....  | ..... | QKGSDAWY  |
| prma    | .....    | NTETI    | NHIKSLFE..  | ..... | .....  | ..... | EYGADVWWE |
| mypu    | .....    | DEKVF    | DHVIELVE..  | ..... | .....  | ..... | KYGSVDWFE |
| myge    | .....    | DFSTI    | QYTIKQLK..  | ..... | .....  | ..... | KHGIDSWFE |
| mypn    | .....    | DVTTI    | KYTIQQLK..  | ..... | .....  | ..... | KYGIDSWFE |
| urur    | .....    | DHELV    | ENIINVLN..  | ..... | .....  | ..... | EKGVNAWFD |
| saty    | ...      | ERTLAAM  | EEVAKRVE..  | ..... | .....  | ..... | VDGIQAWWD |
| esco    | ...      | RTLELM   | EEVAKRVE..  | ..... | .....  | ..... | VDGIQAWWD |
| yepe    | ...      | RSIELM   | EEVAKRVE..  | ..... | .....  | ..... | QDGIQAWWD |
| vich    | ...      | NSADLI   | EKVAQLVE..  | ..... | .....  | ..... | QKGIQAWWD |
| hain    | ...      | RTLDDL   | EEVAKRVE..  | ..... | .....  | ..... | RAGIQAWWD |
| acac    | ...      | RTLELL   | EEVAKRVE..  | ..... | .....  | ..... | KAGIQAWWD |
| pamu    | ...      | RTVELV   | EEVAKRVE..  | ..... | .....  | ..... | QKGIQAWWD |
| psae    | ...      | RTVELM   | EEVAQRVE..  | ..... | .....  | ..... | KEGIEAWFK |
| psfl_1  | ...      | RTVELM   | EVVAQRVE..  | ..... | .....  | ..... | QQGIEAWFK |
| xyfa    | ...      | RSAALM   | RQVADRVE..  | ..... | .....  | ..... | QQGVDIWYS |
| neme    | ...      | NSAELL   | EKVALKIE..  | ..... | .....  | ..... | EKGIEAWFS |
| buAPS   | ...      | NTFVFM   | KKIACKVE..  | ..... | .....  | ..... | LEGLQVWWN |
| agtu    | ...      | DEAVN    | ARILEAFE..  | ..... | .....  | ..... | AEGADAWFA |
| sime    | ...      | DDEVN    | ARILVAFE..  | ..... | .....  | ..... | KEGADAWFA |



|           |             |            |            |             |            |
|-----------|-------------|------------|------------|-------------|------------|
| codi      | PHIDELTRPN  | PDDPT.GKST | MRRVPEVLDC | WFESGSMPPFA | QKHYPFE... |
| ripr      | PFIDELTRTN  | PDDPT.GKST | MRRIDDVDC  | WFESGSMPPYG | QVHYPFE... |
| rico      | PFIDELTRPN  | PDDPT.GKST | MRRIEDVDC  | WFESGSMPPYG | QAHYPFE... |
| psfl      | PHIDEHR...  | FACQC.CEPT | MSRVTGVDC  | WFESGAMPFA  | SRHYPFE... |
| suso      | PWIDNVRVKC  | NKCGG....V | AKRIPDVADV | WFDSGVAFFA  | SLGKDWQ... |
| aepe      | PWVDRVELKC  | PRCGG....S | MKRVPDVLV  | WFDSGIAFYA  | SLGYPRD... |
| arfu      | PKIDAVTFSC  | .QCGG....V | MRRVPDVFV  | WFDSGVASWG  | SIAYPLR... |
| meba      | PYVDKLTIPC  | .ECGG....E | KKRVEDVFDV | WFDSAVASWA  | TLKFPQT... |
| meth      | PHVDRIILEC  | GRCGG....R | MKRTPDVLV  | WIDSGVAGWA  | ALHYPRE... |
| pyho      | PYVDAFIIKV  | .N.GK....E | MRRVKDVVDV | WFDSGIASWA  | SLGYPRN... |
| pyfu      | PYVDAFIIKV  | .N.GK....E | MRRVKDVVDV | WFDSGIASWA  | SLGYPRN... |
| pyab      | PYVDAFIIKV  | .N.GK....D | MRRVKDVVDV | WFDSGIASWA  | SLGYPRN... |
| meja      | PTVDKIKLRC  | .ECGG....E | MKRVPDVLV  | WFDSGLAPYA  | SIG.....   |
| haNRC     | PTVDDITIT.  | .EDGT....E | YTRVPDVFV  | WLDSSVASWG  | TLNYPEQ... |
| pyba      | PWIDQVKISA  | HDCD....E  | WVREPYVMDV | WLDSGIAWIA  | AVDGENN... |
| bacel     | REAKDLLPEG  | FTHPGSPNGE | FRKETDIMDV | WFDSGSSHQA  | VLEERDD... |
| baan1     | REAKDLLPEG  | FTHPGSPNGE | FRKETDIMDV | WFDSGSSHQA  | VLEERDD... |
| bast      | REAKDLLPEG  | FTHPSSPNGI | FTKETDIMDV | WFDSGSSHQA  | VLVERDD... |
| basu      | KEAKDLLPEG  | FTHPGSPNGT | FTKEQDIMDV | WFDSGSSHQA  | VLEERDD... |
| baha      | WETKDLLPEG  | FTHPSSPNGQ | FTREMDIMDV | WFDSGSSHQA  | VLVEREE... |
| limo      | RDVKDLLPAG  | FTHPGSPNGE | FTKETDIMDV | WFDSGSSHQA  | VLNARPE... |
| liin      | RDVKDLLPAG  | FTHPGSPNGE | FTKETDIMDV | WFDSGSSHQA  | VLNARPE... |
| stau      | REAIKDLLPEG | FTHPGSPNGT | FTKETDIMDV | WFDSGSSHRG  | VLETRPE... |
| stpy      | KEAKDLLPEG  | FTHPGSPNGE | FTKETDIMDV | WFDSGSSWNG  | VMNTKEN... |
| stmu      | REAKDLLPEG  | FTHPGSPNGE | FTKENDIMDV | WFDSGSSWNG  | VLNTRD...  |
| stpn      | REAIKDLLPEG | FTHPGSPNGE | FKKETDIMDV | WFDSGSSWNG  | VVNRPE...  |
| lala      | REAKDLLPEG  | FTHPASPNGE | FTKEKDIMDV | WFDSGSSWNG  | VLNERDY... |
| enfa      | REAIKDLLPEG | FTHPGSPNGE | FTKETDIMDV | WFDSGSSHEG  | VLREREE... |
| syne      | LTVEELLPEA  | YRNNGR...T | YRKGEDTMDV | WFDSGSSWAA  | VANAKNRP.. |
| arthchl   | MSVEDLLPEK  | YRDKAA...D | YEKGTDTMDV | WFDSGSSWAG  | VLGKREG... |
| prma      | WDEKKLLPEK  | YRNESD...R | WEKGLDTMDV | WFDSGSSWAA  | VCEQREE... |
| mypu      | KSVDELLPSE  | YKNK....N  | WTKETNIMDV | WFDSGSTSIG  | VEIEG..... |
| myge      | KDVTFCFLKPD | .KTKKW..VK | YHKEIDTLDV | WFDSGSSYNV  | LEINK..... |
| mypn      | KDINFFLNPK  | .KIQPG..VE | YKKTDTLEV  | WFDSGSTYNV  | LISNK..... |
| urur      | LDVNAFLTPK  | YLSMKN..KT | FYKEKDIMDV | WFDSGSSYNI  | LGHYN..... |
| saty      | LDPKE..ILG. | .....EDADQ | YEKVPDTLDV | WFDSGSTSYS  | VVDARPEFA. |
| esco      | LDAKE..ILG. | .....DEADQ | YVKVPDTLDV | WFDSGSTHSS  | VVDVRPEFA. |
| yepe      | LDPAE..ILG. | .....ADAAD | YVKVPDTLDV | WFDSGSTHSS  | VVDVRPEFG. |
| vich      | LDTAE..LLG. | .....EDAAN | YEKVLDTLDV | WFDSGVTHSA  | VVDARQEFN. |
| hain      | LDEKE..LLG. | .....ADAET | YRKVPDTLDV | WFDSGSTYSS  | VVANRLEFN. |
| acac      | LDEKE..LLG. | .....ADAET | YRKVPDTLDV | WFDSGSTYSS  | VVANRPEFE. |
| pamu      | LDTAE..LLG. | .....ADADN | YIKVPDTLDV | WFDSGSTYYS  | VVKDRPEFN. |
| psae      | LDAAE..LLG. | .....EEAAQ | YEKINDTLDV | WFDSGTTHWH  | VLRGSHRIGH |
| psfl_1    | LDAAE..LLG. | .....DEAPL | YDKISDTLDV | WFDSGTTHWH  | VLRGSHPMGH |
| xyfa      | LDQTE..LLG. | .....TEADQ | YEKITDILDV | WFDSGITHEA  | VLLERG.LP. |
| neme      | LDKSE..LLSA | .....EDCEN | YDKLSDTMDV | WFDSGSTHYS  | VVKQREELE. |
| buAPS     | IDSKE..ILG. | .....EEYQS | YEKILDILDV | WFESGNTHTT  | INYKNKNYT. |
| agtu      | EGAKERFLGN  | ....DHDHAK | WQQVMDILDV | WFDSGCTHTF  | TLEDPRDMK. |
| sime      | EGAKERFLGN  | ....DHDHAR | WHQVTDILDV | WFDSGSTHTF  | TLEDPRDLK. |
| melo      | AGAKERFLGN  | ....HDASK  | WKQVMDILDV | WFDSGSTHVF  | TLEDPRDLK. |
| cacr      | R.PDADFLGA  | ....HDPAQ  | YEKITDILDV | WFDSGCTHAF  | TIEGRADSA. |
| hepy26695 | YSVKDLLPPS  | Y...QEDAKH | YEKIMHILDV | WFDSGSTFKA  | VLEDYHGEK. |

|         |            |            |             |             |             |
|---------|------------|------------|-------------|-------------|-------------|
| hepyj99 | YNIKDLLPPS | Y...QDNAKH | YEKVMHILDV  | WFDSGSTFKA  | VLEDYHGEEK. |
| caje    | FEIKDLIPTN | S...KYKAEN | LEKVYDILDV  | WFDSGSTFNA  | VLNSGLYDA.  |
| thma    | KEVEELIPED | FVCPKCGKRS | FEKMLDTLDDV | WIDSGASFY   | ITTKREDHP.  |
| fepe    | LDVNELIPAD | FKCPACGSKN | FEKTHDTLDDV | WMDSGCSWEA  | VIRSKGER..  |
| aqae    | LTSSQLLPEG | YKCPKCGGDS | FTKEEDILDV  | WFDSGCASHAA | VIRPLGFQ..  |

951

1000

|       |            |            |            |             |            |
|-------|------------|------------|------------|-------------|------------|
| mask  | .....      | .....      | .....      | .....       | *** *****  |
| stau2 | .....      | .....KIF   | NQH.....   | .....FPADF  | IAEGVDQTRG |
| bace2 | .....      | .....ELF   | EDQ.....   | .....FPADV  | IAEGIDQTRG |
| baan2 | .....      | .....ELF   | EEQ.....   | .....FPADV  | IAEGIDQTRG |
| ocih  | .....      | .....ELF   | NKQ.....   | .....FPADV  | VIEGVDQTRG |
| clpe  | .....      | .....ELF   | EAN.....   | .....YPAQF  | ISEAVDQTRG |
| clac  | .....      | .....EVF   | ENT.....   | .....FPAQF  | ISEAVDQTRG |
| cldi  | .....      | .....ENF   | DQL.....   | .....FPADY  | ISEGIDQTRG |
| pogi  | .....      | .....ERV   | EDGS.....  | .....VFPADF | IAEGVDQTRG |
| bafr  | .....      | .....ELL   | DSHQ.....  | .....VYPADF | IAEGVDQTRG |
| feac  | .....      | .....F     | NTEG.....  | .....IPVDF  | ITEAIDQTRG |
| thvo  | .....      | .....F     | DPSS.....  | .....DLPVSF | ITEAIDQTRG |
| thnw  | .....      | .....F     | DPET.....  | .....DVPVSF | ITEAIDQTRG |
| cyhu  | .....      | .....ELF   | NNN.....   | .....YPADF  | IAEGVDQTRG |
| chte  | .....      | .....ELF   | DKT.....   | .....FPADF  | IAEGVDQTRG |
| dera  | EAVRGA.... | .....EQF   | AKH.....   | .....YPADY  | ICEAIDQTRG |
| stco  | .....      | .....ELF   | ESR.....   | .....YPAQF  | ISEAIDQTRG |
| thth  | .....      | .....EVF   | RES.....   | .....FPADF  | IAEGIDQTRG |
| deet  | RS.....    | .....IAK   | DGR.....   | .....FPADY  | ICEAVDQTRG |
| anga  | .....      | .....NPAEF | MN.....    | .....NFPADF | IAEGIDQTRG |
| drme  | .....      | .....NEKDF | MN.....    | .....NFPADF | IAEGIDQTRG |
| hosa  | .....      | .....NKREF | ED.....    | .....AFPADF | IAEGIDQTRG |
| cael  | .....      | .....NRKIF | ED.....    | .....NFPADF | IAEGIDQTRG |
| asfu  | .....      | .....NKEQF | EK.....    | .....SFPGDF | IAEGLDQTRG |
| scpo  | .....      | .....RIEEF | KH.....    | .....GFPADF | ISEGVDQTRG |
| sace  | .....      | .....NTEKF | DE.....    | .....RVPANF | ISEGLDQTRG |
| ledo  | .....      | .....NQDKF | KS.....    | .....LFPADF | VSEGLDQTRG |
| lema  | .....      | .....NQDKF | KS.....    | .....LFPADF | VSEGLDQTRG |
| arth  | .....      | .....NKELF | EK.....    | .....NFPGDF | VAEGLDQTRG |
| teth  | .....      | .....NEEEF | SK.....    | .....RFPADF | IGEGIDQTRG |
| encu  | GVDLGSLSVS | GGEERNKKLV | KE.....    | .....NFPAHF | IGEGLDQTRG |
| nolo  | .....      | .....L     | .....      | .....CLPADF | VAEGVDQTRG |
| plfa  | .....      | .....ETNDF | HK.....    | .....IFPADF | IAEGLDQTRG |
| plyo  | .IANSEIDIS | ...KVSMDQF | NQ.....    | .....IFPADF | IAEGLDQTRG |
| chtr  | .....      | .....RAEET | EA.....    | .....CFPADF | IAEGLDQTRG |
| chmu  | .....      | .....RAEET | EA.....    | .....RFPADF | IAEGLDQTRG |
| chpn  | .....      | .....NQKET | EE.....    | .....AFPADF | IAEGLDQTRG |
| trde  | .....      | .....NKEHF | EK.....    | .....NFPADF | ISEGLDQTRG |
| trpa  | .....      | .....HATDF | ER.....    | .....YFPAHF | ISEGLDQTRG |
| bobu  | .....      | .....NEINF | KN.....    | .....IFPADF | IAEGLDQTRG |
| myle  | .....      | .....NDDWF | DGFDSADSDK | QVDAHYPGDF  | IVEYIGQARG |
| mytu  | .....      | .....NLDWF | QG.....    | .....HYPGDF | IVEYIGQTRG |
| codi  | .....      | .....NKDWF | DT.....    | .....HSPADF | IVEYSGQTRG |
| ripr  | .....      | .....NKKWF | VE.....    | .....HFPADF | IVEYSSQTRG |
| rico  | .....      | .....NKEWF | ED.....    | .....HFPADF | IVEYSAQTRG |



|           |       |            |         |             |            |
|-----------|-------|------------|---------|-------------|------------|
| psfl      | ..... | .....NKQEF | EQ..... | .....TFPADF | IVEYLAQTRG |
| suso      | ..... | .....EKW   | KE..... | .....LGPVDL | VLEGHDQLRG |
| aepe      | ..... | .....R.ETW | ER..... | .....LKPVDF | IVEGHDQIRG |
| arfu      | ..... | .....K.DKF | EE..... | .....LWPADF | ITEGHDQTRG |
| meba      | ..... | .....R.EQF | DE..... | .....WWPADF | ITEGHDQTRG |
| meth      | ..... | .....K.ELF | SE..... | .....WFPYDF | ITEGHDQTRG |
| pyho      | ..... | .....K.ELF | EK..... | .....LWPADF | IVEGEDQVTK |
| pyfu      | ..... | .....K.ELF | EK..... | .....LWPADF | IVEGEDQVTK |
| pyab      | ..... | .....K.ELF | EK..... | .....LWPADF | IVEGEDQVTK |
| meja      | ..... | .....V     | KE..... | .....LKKADF | ITEGHDQVTK |
| haNRC     | ..... | .....E.DDF | DE..... | .....LWPADL | IMEAHDQTRG |
| pyba      | ..... | .....R.DLW | EK..... | .....LFPYDF | VTEGIDQTRG |
| bacel     | ..... | .....      | LQ..... | .....RPADL  | YLEGSDQYRG |
| baanl     | ..... | .....      | LQ..... | .....RPADL  | YLEGSDQYRG |
| bast      | ..... | .....      | LM..... | .....RPADL  | YLEGSDQYRG |
| basu      | ..... | .....      | LV..... | .....RPADL  | YLEGSDQYRG |
| baha      | ..... | .....      | LD..... | .....RPADL  | YLEGSDQYRG |
| limo      | ..... | .....      | LS..... | .....RPADL  | YMEGSDQYRG |
| liin      | ..... | .....      | LS..... | .....RPADL  | YMEGSDQYRG |
| stau      | ..... | .....      | LS..... | .....FPADM  | YLEGSDQYRG |
| stpy      | ..... | .....      | LS..... | .....YPADL  | YLEGSDQYRG |
| stmu      | ..... | .....      | LG..... | .....YPADL  | YLEGSDQYRG |
| stpn      | ..... | .....      | LT..... | .....YPADL  | YLEGSDQYRG |
| lala      | ..... | .....      | LS..... | .....FPADL  | YLEGSDQYRG |
| enfa      | ..... | .....      | LT..... | .....FPADM  | YLEGSDQYRG |
| syne      | ..... | .....      | LK..... | .....YPVDM  | YLEGSDQHRG |
| arthchl   | ..... | .....      | LS..... | .....FPADV  | YLEGTDQHRG |
| prma      | ..... | .....      | LQ..... | .....YPADL  | YLEGSDQHRG |
| mypu      | ..... | .....      | VS..... | .....VPFDL  | YLEGIDQYRG |
| myge      | ..... | .....      | YG..... | .....SIADL  | YIEGSDQYRG |
| mypn      | ..... | .....      | LN..... | .....FPADL  | YLEGSDQYRG |
| urur      | ..... | .....      | LN..... | .....YPADV  | YLEGYDQYRG |
| saty      | ..... | .....      | .G..... | .....HAADM  | YLEGSDQHRG |
| esco      | ..... | .....      | .G..... | .....HAADM  | YLEGSDQHRG |
| yepe      | ..... | .....      | .G..... | .....HSPDM  | YLEGSDQHRG |
| vich      | ..... | .....      | .G..... | .....AEADM  | YLEGSDQHRG |
| hain      | ..... | .....      | .G..... | .....QDIDM  | YLEGSDQHRG |
| acac      | ..... | .....      | .G..... | .....KAADM  | YLEGSDQHRG |
| pamu      | ..... | .....      | .G..... | .....QEADM  | YLEGSDQHRG |
| psae      | ..... | .....A     | SG..... | .....PVADL  | YLEGSDQHRG |
| psfl_1    | ..... | .....E     | TG..... | .....PRADL  | YLEGSDQHRG |
| xyfa      | ..... | .....      | .....   | .....KPADL  | YLEGADQHRG |
| neme      | ..... | .....      | .....   | .....WPADL  | YLEGSDQHRG |
| buAPS     | ..... | .....      | .K..... | .....KNADM  | FLEGSDQHRG |
| agtu      | ..... | .....      | .....   | .....WPADV  | YLEGSDQHRG |
| sime      | ..... | .....      | .....   | .....WPADV  | YLEGSDQHRG |
| melo      | ..... | .....      | .....   | .....WPADV  | YLEGSDQHRG |
| cacr      | ..... | .....      | .....   | .....WPADL  | YLEGSDQHRG |
| hepy26695 | ..... | .....      | GQ..... | .....SPSDV  | ILEGSDQHRG |
| hepyj99   | ..... | .....      | GQ..... | .....SPSDV  | VLEGSDQHRG |
| caje      | ..... | .....      | GE..... | .....KRASM  | YLEGSDQHRG |
| thma      | ..... | .....      | .....   | .....FPLDM  | YLEGSDQHRG |

fepe .....FPVDL YLEGDDQHRG  
 aqae .....KADL YLEGSDQHRG

1001 1050

mask \*\*\*\*\* . \*\*\*\*\* . \*\*\*\*\* . \*\*\*\*\* . \*\*\*\*\* . \*\*\*\*\* .  
 stau2 WFYSLLVIST ILKG.KSSYK RALSLGHILD SNGKKMSKSK GNVINPTELI  
 bace2 WFYSL LAVSA LYTG.KVPYK RVLSLGHVLD EEGQKMSKSK GNALDPVDLV  
 baan2 WFYSL LAVSA LYTG.KVPYK RVLSLGHVLD EEGQKMSKSK GNALDPVDLV  
 ocih WFYSL LAVST LFTG.KTPYK RVLSLGHILD EHGRKMSKSK GNALSPVELI  
 clpe WFYTL LAIST AIFD.RNPF E NCIVLGHVLD KKGLKMSKSK GNVVDPFEVL  
 clac WFYTL LAIST SIFD.KSSFE NCIVLGHVLD KHGLKMSKSK GNVVDPFDVL  
 cldi WFYSL LAVST FVLG.KAPYK SVLVPDLVLD KDGKKMSKSR GNTVNPMELEF  
 pogi WFFTL HAIAT MISG.TSSFK VVVSNGLVLD KKGnkMSKRL GNAVDPFETI  
 bafr WFFTL HAIAT MVFD.SVSYK AVISNGLVLD KNGnkMSKRL GNAVDPFSTI  
 feac WFYTL HVISS LLFG.RNAYK NVMSMSFILD ENGQKMSKSK GNFVTARDFI  
 thvo WFYVL HVIST IMFN.KNAYD SALSISFILD EQGRKMSKSK GNSVFALDYL  
 thnw WFYVL HVIAT IMFN.KNAYE SALSINFILD AQGRKMSKSK GNSVYALDFL  
 cyhu WFFTL HAIISG MLYD.KVAFK NVIANGLVLD KNGnkMSKRV GNVVNPFFETI  
 chte WFYTL HAIAT LIFD.RPAYR NVVVNGHILD KSGQKMSKSK GNVVDPFESM  
 dera WFYSL HAIST MLYD.QPAYK NVICLGHIVD EKGLKMSKSK GNVVAPLPLF  
 stco WFYTL MAVGT LVFD.KSSYE NVVCLGHILA EDGRKMSKHL GNILQPIPLM  
 thth WFNSL HQLGV MLFG.SIAFK NVICHGLILD EKGQKMSKSK GNVVDPWDII  
 deet WFYSL HAIST LIFN.RPCYQ NVICLGHILD ERGEKMSKSR NNVIQPATVL  
 anga WFYTL LVIST ALFN.KAPFK NLNVTGLVLA ADGQKMSKRK KNYDPMEVV  
 drme WFYTL LVIST ALFN.KAPFK NLIASGLVLA ADGQKMSKRK KNYDPMEVV  
 hosa WFYTL LVLAT ALFG.QPPFK NVIVNGLVLA SDGQKMSKRK KNYDPVSI I  
 cael WFYTL LVLST ALFN.KPPFK NLICNGLVLA SDGAKMSKSK KNYDPMLIIV  
 asfu WFYTL TVLGT HLF G.TLPFK NCVVNGIVLA EDGKKMSKRL KNYDPPTLIM  
 scpo WFYTL TVLGT LLFD.KAPYK NVIVSGLVMA EDGKKMSKRL KNYPEPNLII  
 sace WFYTL AVLGT HLF G.SVPYK NVIVSGIVLA ADGRKMSKSL KNYDPDSIVL  
 ledi WFYTL LVLG ALFD.VSPFR NVAVSGLVLA EDGKKMSKRL KNYPEPKVVI  
 lema WFYTL LVLG ALFD.VSPFR NVAVSGLVLA EDGKKMSKRL KNYPEPKVVI  
 arth WFYTL MVLST ALFE.KPAFK NLICNGLVLA EDGKKMAKKL RNYPPP LEVI  
 teth WFYTL NVIST ALRN.SNPYK NLIVNGIVLA ADGKKMSKSK KNYDDPLLIA  
 encu WFYTL HVISS LLFG.QPAFL NVVVNGIVLA EDGRKMSKRL RNYDPDSHIF  
 nolo WFYTM HVIST VLLA.KPRFR NCIVNGIVLA SDKKKMSKRL KNYDPDMDVI  
 plfa WFYTL LVIST LLFN.KAPFK NLICNGLVLA SDGKKMSKRL KNYDPPLYIIL  
 plyo WFYTL LVIST LLFD.KAPYK NLICNGLILA SDGKKMSKRL KNYDPDIYIIL  
 chtr WFYTL TVIAA ALFD.QPAFK NVIVNGIILA EDGNKMSKRL NNYPSPKMIM  
 chmu WFYTL TVIAA ALFD.QPAFK NVIVNGIVLA EDGNKMSKRL NNYPSPKKIM  
 chpn WFYTL TVISA ILFD.RPAFR NAIVNGIILA EDGNKMSKRL NNYPSPKYVL  
 trde WFYTL TILAA ALFD.EPAFK NCIVNGLVLA EDGKKMSKSL RNYTDPNEVI  
 trpa WFYTL TILAV ALFE.RPAFE NCIVTGLVLA SDGKKMSKAL RNYADPNEVM  
 bobu WFYTL TILGT ALFE.NTAFK NVIVNGLVLS SDGRKMSKSF KNYTDPMQVI  
 myle WFYTL HVLAT ALFD.RPAFK TCIAHGVLG SNGQKMSKSL RNYPDVTEIF  
 mytu WFYTL HVLAT ALFD.RPAFK TCVAHGIVLG FDGQKMSKSL RNYPDVTEVF  
 codi WFYTL HVLAT ALFD.RPAFK KVAHGIVLG DDGTKMSKSR RNYPDVNEVF  
 ripr WFYTL MVLST ALFD.RPPFL NCICHGVILD ATGQKLSKRL NNYADPLELEF  
 rico WFYTL MVLST ALFD.RPPFL NCICHGVILD STGQKLSKRL NNYADPLELEF  
 psfl WFYTM MVIST GCFE.QNPFK NAMCHGVILA KDGRKMSKRL KNYPNPMDLM  
 suso WFFSLLRSGL ILLD.RAPYT SVLVHGFMLD EQGREMHKSL GNYVEPSVVV  
 aepe WFFSLLRSKV IGFG.ETPYR RVLVHGFALD EQGREMHKSL GNYVDFEELI

|           |             |            |            |            |             |
|-----------|-------------|------------|------------|------------|-------------|
| arfu      | WFYSQLGTSV  | VCFD.KAPYK | AVLMHGFTLD | EQGRKMSKSL | GNVVEPEEVV  |
| meba      | WFYSQLGASM  | VGFG.RAPYK | SVLMHGFTLD | AGGKKMSKSL | GNVVSPIDVI  |
| meth      | WFYSQLGCGV  | IALD.ETPYR | RVLMHGFTLD | EEGRKMSKSL | GNVVEPEDVI  |
| pyho      | WFYSQLQAASV | IAFD.TVPYR | RVAMHGYVLD | EKGDKMSKSL | GNIIRPEEVV  |
| pyfu      | WFYSQLQAASV | IAFD.TVPYR | AVAMHGYVLD | EKGDKMSKSL | GNIIRPEEVV  |
| pyab      | WFYSQLQAASI | VAFD.TVPYR | RVAMHGYVLD | EKGDKMSKSL | GNIIRPEEVV  |
| meja      | WFYSQLHALSA | IVFN.DIPYK | KCLMHGFTLD | EHGDKMSKSL | GNVVNPDDVV  |
| haNRC     | WFWSQLGMGT  | AALG.DVPYE | EVLMHGYANM | PDGRGMSKSK | GITIEPNEVI  |
| pyba      | WFYSLLATSV  | LYTG.RAPYK | NVLIQGLILD | KHGQKMSKSK | GNVIWAKDLF  |
| bacel     | WFNSSLSTAV  | AVTG.KAPYK | GVLSHGFVLD | GEGRKMSKSI | GNIVVPKKIM  |
| baan1     | WFNSSLSTAV  | AVTG.KAPYK | GVLSHGFVLD | GEGRKMSKSI | GNIVVPKKIM  |
| bast      | WFNSSLSTAV  | AVTG.KAPYK | GVLSHGFVLD | GEGRKMSKSL | GNVVVPAKVM  |
| basu      | WFNSSLSTAV  | AVTG.KAPYK | GVLSHGFALD | GEGRKMSKSI | GNVVVPAKVM  |
| baha      | WFNSSLSTSV  | AITG.KAPYK | GVLSHGFTLD | GEGKKMSKSL | GNVVIPNDVM  |
| limo      | WFNSSLTTAV  | AITG.EAPYR | NVLSHGFALD | GEGRKMSKSL | GNTLLPGKVI  |
| liin      | WFNSSLTTAV  | AITG.EAPYR | NVLSHGFALD | GEGRKMSKSL | GNTLLPGKVI  |
| stau      | WFNSSITTSV  | ATRG.VSPYK | FLLSHGFVMD | GEGKKMSKSL | GNVIVPDQVV  |
| stpy      | WFNSSLITSV  | AVNG.HAPYK | AILSQGFVLD | GKGEKMSKSK | GNIISPNDVA  |
| stmu      | WFNSSLITSV  | AVNG.HAPYK | SVLSQGFVLD | GKGEKMSKSK | GNIISPNDVA  |
| stpn      | WFNSSLITSV  | ANHG.VAPYK | QILSQGFALD | GKGEKMSKSL | GNTIAPSDVE  |
| lala      | WFNSSITTSV  | AVNG.VAPYK | AVLSQGFVLD | GKGRKMSKSI | GNTIVPKDVT  |
| enfa      | WFNSSITTSV  | AING.VAPYK | SIISQGMVLD | GEGRKMSKSL | GNTILPEKVI  |
| syne      | WFQSSLLTSV  | AVNG.IAPYK | TVLTHGFVLD | EKGHKMSKSL | GNVVDPYQII  |
| arthchl   | WFQSSLLTSI  | ATQG.KAPYS | AVITHGFVLD | EKGMKMSKSL | GNVVDPRLVI  |
| prma      | WFQSSLLTSV  | AVNN.KPPYK | TVLTHGFALD | ENGRKMSKSL | GNVVDPNIII  |
| mypu      | WFNSSIINSV  | AYWG.QSPYR | LLLSHGFVLD | GKGGKMSKQL | GNVVDPQEI   |
| myge      | WFNSSSNCGI  | IQND.LIPFK | SLVSHGFTLD | ENGNKMSKSL | GNIVDPLKIC  |
| mypn      | WFNSSASCGI  | IQTD.QLPFK | SLISHGFTLD | EHGNKMSKSL | GNVVDPKLKC  |
| urur      | WFNSSLITGT  | ILNN.RAPYK | YLVAHGMVLD | GEGYKMSKSK | GNVVDPDVC   |
| saty      | WFMSSLMISV  | AMKG.KAPYR | QVLTHGFTVD | GQGRKMSKSI | GNTVSPQDVM  |
| esco      | WFMSSLMIST  | AMKG.KAPYR | QVLTHGFTVD | GQGRKMSKSI | GNTVSPQDVM  |
| yepe      | WFMSSLMIAT  | AMKG.KAPYR | QVLTHGFTVD | GQGRKMSKSI | GNTISPQDVM  |
| vich      | WFQSSLISSV  | AMKG.KAPYK | EVLTHGFVVD | GQGRKMSKSI | GNVVAPQDVT  |
| hain      | WFMSSMLLST  | ATDS.KAPYK | QVLTHGFTVD | GQGRKMSKSI | GNIVTPQEV   |
| acac      | WFMSSMLLST  | ATDN.KAPYK | QVLTHGFTVD | GQGRKMSKSI | GNVVTPQEV   |
| pamu      | WFMSSMLLST  | ATDN.KAPYK | QVLTHGFTVD | GQGRKMSKSI | GNIVTPQEV   |
| psae      | WFHSSLLTGC  | AIDN.HAPYR | QLLTHGFTVD | ESGRKMSKSL | GNTVVPQTVI  |
| psfl_1    | WFHSSLLTGC  | AIDN.HAPYR | ELLTHGFTVD | ETGRKMSKSL | KNVIEPKKIN  |
| xyfa      | WFQSSLLTGV  | AMDN.AAPYK | QCLTHGFTVD | QHGRKMSKSL | GNGIEPQDII  |
| neme      | WFQSSMLTGC  | ASSMGRAPYK | QLLTHGFVVD | GEGKKMSKSI | GNVVAPQEVY  |
| buAPS     | WFMSSLIIST  | LISE.KKPYS | EVLTHGFVVD | GKGQKMSKSI | GNTISPNEIV  |
| agtu      | WFHSSLLESC  | ATRG.RAPYN | AVVTHGFTMD | EQGRKQSKSL | GNVVAPQDVM  |
| sime      | WFHSSLLESC  | ATRG.RAPYN | AVITHGFTMD | EKGEKMSKSK | GNTVTPQEV   |
| melo      | WFHSSLLESC  | GTRG.RAPYD | TVVTHGFTMD | EDGRKMSKSL | GNTVVPQDVI  |
| cacr      | WFQSSLLEGC  | GTRG.RAPYK | AVVTHGFTMD | ENGEKMSKSR | GNTIEPQTIT  |
| hepy26695 | WFQSSLLIGC  | VLNN.QAPFK | KVITHGFIVD | EKGEKMSKSK | GNVVSLLDKLL |
| hepyj99   | WFQSSLLIGC  | VLNN.QAPFK | KVITHGFIVD | EKGEKMSKSK | GNVVSLLDNLL |
| caje      | WFQSSLLVGT  | AINE.SAPYE | SILTHGFTTD | EKGQKMSKSK | GNVIASEYVA  |
| thma      | WFHSSIFLAV  | AKRG.SAPYK | EVLTHGFIKD | EQGRKMSKSL | GNVVDPMEVV  |
| fepe      | WFQSSIFLST  | AKAG.TAPFK | AVVTHGFIKD | EQGRKMSKSL | GNVIDPMEIV  |
| aqae      | WFQASLLESV  | GSYL.EAPYK | AVLTHGFIVD | EKGRKMSKSL | GNVISPQEVV  |

```

mask ..... ***** ** .....
stau2 N..... KYGADSLRWA LISDSAPW.N NKRFSENI.. VAQTKSKFID
bace2 N..... QFGADALRWA LLVDSAPW.N AKRFSERT.. VLEAKSKFVD
baan2 G..... KFGADALRWA LLVDSALW.N AKRFSERT.. VLEAKSKFVD
ocih  E..... EFGADALRWA LLADSSPW.N NKRFSSKT.. VSQAKSKVID
clpe  D..... SQGADATRWH FYTASAPW.L PTRFSIED.. VAETQRKFLS
clac  D..... NQGADACRWH FYTSSAPW.L PTRFSQED.. VAETQRKFLS
cldi  D..... QYGADALRWY LLYVSPPW.T PTKFDMDG.. LKEIQSKFIG
pogi  K..... KYGSDPLRWY MITNSSPW.D NLKFDTDG.. VEEVRRKFFG
bafr  E..... QYGSDPLRWY MITNSSPW.D NLKFDVDG.. IEEVRRKFFG
feac  S..... MYGADPARLF FYTG.APW.N SKSIDKKL.. IGDTARKVFG
thvo  K..... QVAPDSLRLF FLYG.APW.K SKNLDRKI.. IDEVSRRVIS
thnw  N..... EVPPDSLRLF FLYG.APW.K SKNLDKKV.. IDEVSRKTLM
cyhu  D..... KYGPDATRWY MITNAPPW.D NLKFNLDG.. ITEVQRRFFG
chte  E..... QYGADAIRWY LMITSPPW.R PKLFNAAE.. IEEEQRKFFR
dera  D..... QYGADSVRWY MFMASDPG.D QKRFSERL.. VAEAQRSYVN
stco  D..... QHGADAVRWF MAAGGSPW.A ARRVGHGT.. IQEVVRKTL
thth  R..... KFGADALRWY IYVSAPPE.A DRRFGPNL.. VRETVRDYFL
deet  D..... KYGADAVRWY FYTAAPPG.N ARRFSKEL.. VGEVTRQFLL
anga  N..... KYGADALRLY LINSPPVRAE NLRFKKEG.. VRDIKDVFL
drme  H..... KYGADALRLY LINSPPVRAE SLRFKEEG.. VRDIKDVFL
hosa  Q..... KYGADALRLY LINSPPVRAE NLRFKKEG.. VRDVLKDVLL
cael  N..... KYGADALRLY LINSPPVRGE NLRFREEG.. VRDLLKDVFL
asfu  Q..... RYGSDALRLY LINSPPVRAE PLRFKESG.. VKEIVAKVLL
scpo  E..... KYGSDALRLY LINSPPVRAE ILKFKEDG.. VREVTRVLI
sace  N..... KYGADALRLY LINSPLKAE SLKFKEEG.. VKEVSKVLL
ledo  D..... TYGADALRMY MISSPVVRAE PLRFREAG.. VKGVVKDILL
lema  D..... TYGADALRMY MISSPVVRAE PLRFREAG.. VKGVVKDILL
arth  D..... EYGADAVRLY LINSPPVRAE PLRFKKEG.. VLGVVKDVFL
teth  S..... KYSVDAILRY MINSPLVRAE EMSFKSEG.. VFAVKKDIFL
encu  N..... TYGADSLRMY LISSPVVEAE NLKFSEGG.. VKEVLKTLII
nolo  N..... RYSADSLRLY LISSPVVMAE NMCFSSEG.. VGEVLKTLII
plfa  N..... KYGADSLRLY LINSVAVRAE NLKFQEKG.. VNEIVKSFIL
plyo  N..... KYGADSLRLY LINSVAVRAE NLKFQEKG.. VNEIVKSFIL
chtr  D..... AYGADALRLY LLNSVVVKA E DLRFSDKG.. VESVLKQVLL
chmu  D..... TYGADALRLY LLNSVVVKA E DLRFSDKG.. VEAVLKQVLL
chpn  D..... TYGADALRLY LLHSVVVKA E DLRFSDKG.. IEGVLKQILL
trde  K..... QFGADALRLF LMNSNVVKAD DLKYSDEG.. VRDVLKGILI
trpa  D..... RYGADALRLF LVRSAVVRAD DLKYSDEG.. VKDILKTVII
bobu  N..... TFGADALRLY LIMSPVVKAD DLKYSDEG.. VRDVLKNI II
myle  D..... RDGSDAMRWF LMASPILRGG NLIITEPG.. IREGMRQVLL
mytu  D..... RDGSDAMRWF LMASPILRGG NLIVTEQG.. IRDGVVQVLL
codi  N..... RDGSDAMRWF LMSSPILRGG NLIVTEQG.. IREGVRQALL
ripr  D..... KYGSDALRVT MLSSNVVKGQ ELLIDKDGKM VFDTLRLFIK
rico  D..... KYGSDALRVT MLSSNVVKGQ ELLIDKDGKM VFDTLRLFIK
psfl  Q..... THGSDALRVA LLASPVCKGE DIKFSEES.. VRDVVRRYHL
sus0  E..... KYGRDILRLW LLRN.TTW.E DAKFSWKA.. .LELTKRDQL
aepe  A..... KVPRDVVRFW VLQN.TVW.E DLRFSWKG.. .LDLMRRDFN
arfu  G..... QIGVDGFRLY VLYS.APW.E DLRFSWEE.. .ARNINRMLN
meba  D..... KYGADTLRAY VLSSSAPW.D DLKFNQEE.. .VENVHRSIN
meth  E..... KYGADVLRFY LLWANKPW.E DLKFWWDE.. .LKNVNKMFN

```

|           |            |            |            |             |             |
|-----------|------------|------------|------------|-------------|-------------|
| pyho      | E.....     | KAGRDTFRFY | MLWATNPW.E | NLKFSWKG..  | VEQVRRMLN   |
| pyfu      | E.....     | KAGRDTFRFY | MLWATNPW.E | NLKFSWKG..  | VEQVRRMLN   |
| pyab      | E.....     | RAGRDTFRFY | MLWATNPW.E | NLKFSWKG..  | VEQVRRMLN   |
| meja      | E.....     | KYGADLLRFY | LLSANKVW.E | DLRFVWSE..  | MDDVLSLFN   |
| haNRC     | D.....     | EYGADPMRMF | LLSVTPQG.D | DMSFSWDE..  | TENMQRDLN   |
| pyba      | E.....     | KYGADPVRLY | ILSKVAPW.E | DLSFDPDE..  | VKYVIGDLN   |
| bacel     | D.....     | QLGGDILRLW | VSSVDYQS.. | DVRISDDILK  | ..QVAEVYRK  |
| baan1     | D.....     | QLGGDILRLW | VSSVDYQS.. | DVRISDDILK  | ..QVAEVYRK  |
| bast      | E.....     | QFGADILRLW | VASVDYQA.. | DVRISDHILK  | ..QVSEVYRK  |
| basu      | K.....     | QLGADILRLW | VSSVDYQA.. | DVRVSDAILK  | ..QVAEVYRK  |
| baha      | K.....     | QLGADILRLW | VASVDYQA.. | DVRVSDKILK  | ..QVSEVYRK  |
| limo      | K.....     | QLGADIVRLW | VASVDYQA.. | DVRVSDEILK  | ..QVSEVYRK  |
| liin      | K.....     | QLGADIVRLW | VASVDYQA.. | DVRVSDEILK  | ..QVSEVYRK  |
| stau      | K.....     | QKGADIARLW | VSSTDYLA.. | DVRISDEILK  | ..QTSDVYRK  |
| stpy      | K.....     | QYGADILRLW | VASVDTDN.. | DVRVSMEILG  | ..QVSETYRK  |
| stmu      | K.....     | QYGAEILRLW | VASVDTDS.. | DVRVSMEILG  | ..QVSETYRK  |
| stpn      | K.....     | QFGAEILRLW | VTSDVSSN.. | DVRISMDILS  | ..QVSETYRK  |
| lala      | K.....     | KFGADILRLW | VASIDTES.. | DVRVSMIDILS | ..QVSEVYRK  |
| enfa      | N.....     | QMGADILRLW | VSSVDAEA.. | DVRVSMIDILN | ..QVSEVYRK  |
| syne      | NGGKNQKQEP | AYGADVLRLW | VASVDYAN.. | DVPIGQGILK  | ..QLVDIRNK  |
| arthchl   | EGGKNSKDAP | AYGADVRLW  | VSSVDYTG.. | DVLIGPQILR  | ..QMSDIYRK  |
| prma      | NGGPNQKIQP | AYGADVLRLW | VSSVDYSV.. | DVPIGSNILK  | ..QLSDVYRK  |
| mypu      | Q.....     | KYGADILRLW | VANCEYAH.. | DVSVSESIK   | ..QTVENYRK  |
| myge      | D.....     | QYGADILRLW | VANTDWQI.. | DNKIGVNILK  | ..QVAEQYRR  |
| mypn      | D.....     | QYGADILRLW | VTNVDWQV.. | DNRIGDNIK   | ..QIVEQYRR  |
| urur      | K.....     | IYGADVLRLW | IANSDYQN.. | DTRISEEILK  | ..QNAEIYRR  |
| saty      | N.....     | KLGADILRLW | VASTDYTG.. | EMAVSDEILK  | ..RAADS YRR |
| esco      | N.....     | KLGADILRLW | VASTDYTG.. | EMAVSDEILK  | ..RAADS YRR |
| yepo      | N.....     | KLGGDILRLW | VASTDYTG.. | EIAVSDEILK  | ..RSADS YRR |
| vich      | N.....     | KLGADILRLW | VASTDYTG.. | EVAVSDEILK  | ..RSADAYRR  |
| hain      | D.....     | KFGGDILRLW | VASTDYTG.. | EMTVSDEILK  | ..RAADS YRR |
| acac      | D.....     | KFGGDILRLW | VASTDYTG.. | EMTVSDEILK  | ..RAADS YRR |
| pamu      | D.....     | KFGGDILRLW | VASTDYTG.. | EISVSDEILK  | ..RAADAYRR  |
| psae      | D.....     | TLGADILRLW | VASTDYSG.. | EIAVSQQILQ  | ..RSADAYRR  |
| psfl_1    | D.....     | TLGADIMRLW | VASTDYSG.. | EIAVSDQILA  | ..RSADAYRR  |
| xyfa      | K.....     | TLGADILRLW | IASTDYSN.. | EMSLSQEILK  | ..RTTDAYRR  |
| neme      | N.....     | EFGADILRLW | AASTDYSG.. | ELAISKEILK  | ..RVTES YRR |
| buAPS     | D.....     | TLGADILRLW | VASSNYSN.. | DISISNEILK  | ..SSSDIYRR  |
| agtu      | K.....     | ESGADILRLW | VMTTDYWE.. | DQRLGKAI IQ | ..TNIDAYRK  |
| sime      | K.....     | DAGADILRLW | VMTTDYWE.. | DQRLGKTIIQ  | ..TNIDAYRK  |
| melo      | K.....     | QSGADILRLW | VVTTDYWE.. | DQRLGKNVLQ  | ..TNIDAYRK  |
| cacr      | K.....     | ESGAEILRLW | TAMVDYQE.. | DQRIGKTILA  | ..TTTDAYRK  |
| hepy26695 | K.....     | THGSDVVRLW | VAFNDYQN.. | DLRVSQTFFT  | ..QTEQHYKK  |
| hepyj99   | K.....     | KHGSDVVRLW | VAFNDYQN.. | DLRVSQTFFI  | ..QTEQHYKK  |
| caje      | K.....     | TYGVEILRLW | ILLSYSS..  | DLKISDNILK  | ..QVGEQYRK  |
| thma      | E.....     | KYGAEILRLW | LASSDYFN.. | DIKISMRIVE  | ..QQTEVYRK  |
| fepe      | N.....     | KYGADILRLW | VASTDFFD.. | NIRVGKNIIE  | ..QQVEVYRK  |
| aqae      | K.....     | EFGADILRLW | VVSEDYTE.. | DVKLGKNLLK  | ..KIADDYRK  |

1101

1150

|       |            |            |         |          |            |
|-------|------------|------------|---------|----------|------------|
| mask  | ***.....   | .....      | .....   | .....    | .....      |
| stau2 | TLDNIYKFYN | MYNKIDH... | .....YN | PN.....N | ..E...ITKS |

|       |            |            |            |         |         |            |            |
|-------|------------|------------|------------|---------|---------|------------|------------|
| bace2 | TLVNVYSFYV | LYANLDE... | .....      | YN      | PD..... | E          | ..T...YDVK |
| baan2 | TLVNVYSFYV | LYANLDE... | .....      | YN      | PN..... | E          | ..T...YDVK |
| ocih  | TILNVYSFYV | MYADIDK... | .....      | FN      | VA..... | E          | ..H...ATDA |
| clpe  | TLWNVYSFYV | LYAELDN... | .....      | FN      | PL..... | D          | .YK...DFVS |
| clac  | TLWNVYSFYV | LYAEIDK... | .....      | FN      | PN..... | D          | .YK...DFVS |
| cldi  | TMKNVYNFFT | LYANTDD... | .....      | IN      | PT..... | E          | FFV...EYKD |
| pogi  | TLYNTYQFFA | LYANLDG... | .....      | FT      | GE..... | E          | ESI...PFAK |
| bafr  | TLYNTYSFFA | LYANVDG... | .....      | FE      | YK..... | E          | ADL...PMNE |
| feac  | TLSNVYSFFA | SNANLDG... | .....      | FV      | FQ..... | D          | .....LEPS  |
| thvo  | TLLNVYSFFA | YNANIDG... | .....      | FE      | FK..... | G          | .....ILEA  |
| thnw  | TVLNVYSFFA | YNANIDN... | .....      | FQ      | WN..... | G          | .....LQLS  |
| cyhu  | TLQNTYSFFA | LYANLDN... | .....      | FT      | FA..... | E          | AEI...PLAQ |
| chte  | AFINSYNFFV | LYANVDG... | .....      | FR      | YE..... | E          | ADI...PFTQ |
| dera  | TLWNVYSFFV | LYANLD...  | .....      | QP      | DL..... | A          | AAP...AVAE |
| stco  | TYWNTVAFQA | LYARTTG... | .....      | WA      | PS..... | E          | ADP...APAD |
| thth  | TLWNVYSFFV | TYANLD...  | .....      | RP      | DL..... | K          | NPP...PPEK |
| deet  | MLWNVYSFFV | TYANIDS... | .....      | FT      | PS..... | E          | K.Y...LEGE |
| anga  | PWFNAFRFLF | QNVDRFEKEE | GIR...YRYD | AV..... | R       | HAE...KRS  |            |
| drme  | PWYNAYRFLI | QNIVRYEKED | LAGNGQYTYD | RE..... | R       | HLKN...MDK |            |
| hosa  | PWYNAYRFLI | QNVLRLOKEE | EIE...FLYN | EN..... | T       | VRE...S    |            |
| cael  | PWFNAYRFFV | QNVQAYEHET | GN...VFD   | MN..... | V       | HVA...S    |            |
| asfu  | PLWNSYKFFE | GQAALFKKNN | SID...FVFD | PK..... | A       | EATN.....  |            |
| scpo  | PWWNSYKFFE | AQAALYKKVT | GKD...FVFD | DA..... | A       | TLS.....   |            |
| sace  | PWWNSFKFLD | GQIALLLKMS | NID...FOYD | DS..... | V       | KSD.....   |            |
| ledo  | PLFNAAKFFI | SNTNYCIEAG | GQV...SLQ  | A.....  |         | .....RS    |            |
| lema  | PLFNAAKFFI | SNTNYCIEAG | GQV...SLQ  | A.....  |         | .....RS    |            |
| arth  | PWYNAYRFLV | QNAKRLETEG | GVP...FVP  | TD..... | L       | ATI...QS   |            |
| teth  | PWYNAYKFLI | QSITRWELAT | GKD...YMFN | EQ..... | L       | SVDT...TKL |            |
| encu  | PWYNLSGFYL | E.....     | .....      | N       | RD..... | V          | EPD...GR   |
| nolo  | PWYNCIYFYS | E.....     | .....      | C       | PN..... | A          | G.D...QE   |
| plfa  | PYYHSFRFFS | QEVTRYETTN | KMQ...FLFN | TD..... | Y       | IYK...ND   |            |
| plyo  | PFYHSFRFFS | QEVIRYETSY | KTT...FSFS | NK..... | Y       | IYD...NN   |            |
| chtr  | PLSNALAFYK | TYAELYG... | .....      | FD      | PK..... |            | .ETD...NIE |
| chmu  | PLSNALAFYK | TYAELYG... | .....      | FS      | PN..... |            | .ETT...DLE |
| chpn  | PLTNVLSFFN | TYAELYG... | .....      | FD      | PK..... | S          | .QDI...EPA |
| trde  | PFWNSYSFYI | TYANIDGVKP | PHN...AKVD | GK..... | D       | EGVEEFLAKL |            |
| trpa  | PLWNSYSFYV | TYANIDGIDP | PVC...AKVD | GM..... | G       | QAVTRLATHL |            |
| bobu  | PIWNAYSFFT | TYAIIDKFKP | PKN...LSLA | K.....  |         | .....      |            |
| myle  | PLWNAYSFLA | LYA.....   | .....      | P       | KI..... | G          | TWHTD...V  |
| mytu  | PLWNTYSFLA | LYA.....   | .....      | P       | KV..... | G          | TWRVD...S  |
| codi  | PMWNAYSFLQ | LYS.....   | .....      | S       | KP..... | A          | QWSVD...S  |
| ripr  | PIWNAYHFFT | IYANAD...  | .....      | S       | LK..... | G          | TLNFA...S  |
| rico  | PIWNAYHFFT | MYANAD...  | .....      | S       | LK..... | G          | KLNFS...S  |
| psfl  | LFWNCLQFYK | TFTEIDQ... | .....      | FS      | PS..... | G          | DLGQP...L  |
| suso  | IIWNTFVFAS | MYMNLDN... | .....      | FE      | P.....  | D          | KYTLDDIIKY |
| aepe  | VIWNVYAFAS | IYMGLDR... | .....      | FD      | P.....  | R          | RTSLSSVEDS |
| arfu  | VVWNAVRFAH | TYMSLDN... | .....      | YS      | .....   |            | ...FGEKGE  |
| meba  | ILWNVFRFPL | PYMALDN... | .....      | FD      | P.....  | L          | KVSLDSVKDA |
| meth  | ILWNVYVFAT | TYMSLDR... | .....      | FQ      | P.....  |            | .GDHELEDLH |
| pyho  | ILWNVYVLSA | TYMSLDN... | .....      | FD      | P.....  |            | .RNVKVEELA |
| pyfu  | ILWNVYVLSA | TYMSLDN... | .....      | FD      | P.....  |            | .RNVKVEELE |
| pyab  | ILWNVYVLAS | TYMSLDN... | .....      | FD      | P.....  |            | .RKLNPDELP |

|           |            |            |    |            |             |
|-----------|------------|------------|----|------------|-------------|
| meja      | TLWNAVMFAV | NYMVLDN... | FK | P          | DEKYFEYLK   |
| haNRC     | ILWNVFRFPR | PYMALDD... | FD | ANVPAAFGGD | DAGVGIADAD  |
| pyba      | ILWNVVKFAD | TYMSLDG... | FD | A          | KYPLSQWLEK  |
| bacel     | IRN.TFRFLL | GNLDD...   | FK | PS         | NTVAV...AE  |
| baan1     | IRN.TFRFLL | GNLDD...   | FK | PS         | NTVAV...AE  |
| bast      | IRN.TFRFML | GNLFD...   | FD | PN         | NAVPI...GE  |
| basu      | IRN.TFRFLH | GNLFD...   | FD | PK         | NAVAV...ED  |
| baha      | IRN.TYRFLH | GNLHD...   | FH | PA         | HRVAI...DQ  |
| limo      | IRN.TMRFLH | GNIND...   | FN | PT         | NTVSY...EN  |
| liin      | IRN.TMRFLH | GNIND...   | FN | PT         | NGVSY...EN  |
| stau      | IRN.TLRFML | GNIND...   | FN | PD         | DSIPE...SE  |
| stpy      | IRN.TLRFLL | ANTSD...   | FN | PA         | DTVAY...AD  |
| stmu      | IRN.TLRFLL | ANTTD...   | FN | PY         | NKIAF...ED  |
| stpn      | IRN.TLRFLL | ANTSD...   | FN | PA         | DTVAY...DE  |
| lala      | IRN.TLRFLL | ANTSD...   | FN | PK         | DAIDF...AE  |
| enfa      | IRN.TMRFLH | ANTSD...   | FN | PA         | HTVAY...AD  |
| syne      | IRN.TARFLL | GNLHD...   | FN | PE         | DAVAY...ED  |
| arthchl   | LRG.TLRYLL | GNLHD...   | WR | V          | NAVVPY...QD |
| prma      | VRN.TARYLL | GNIHD...   | YD | PA         | EEIDI...DQ  |
| mypu      | IRN.TIKFLL | GNLQD...   | YD |            | HSKFN...LK  |
| myge      | IRNSLLRFIL | GNING...   | FN | FT         | SMDD...YK   |
| mypn      | IRNSLLRFIL | GNLNH...   | FN | FG         | EMKD...YR   |
| urur      | IRNTLFKYSL | SILND...   | FE | PS         | VDFS...FN   |
| saty      | IRN.TARFLL | ANLNG...   | FN | PA         | DMVKP...EE  |
| esco      | IRN.TARFLL | ANLNG...   | FD | PA         | DMVKP...EE  |
| yepe      | IRN.TARFLL | ANLNG...   | FD | PA         | HQVKP...EE  |
| vich      | IRN.TARFLL | ANLNG...   | FN | PT         | DIIPV...ED  |
| hain      | IRN.TARFLL | ANLNG...   | FD | PK         | DLVKP...EK  |
| acac      | IRN.TARFLL | ANLNG...   | FD | PQ         | DAVKP...EE  |
| pamu      | IRN.TARFLL | ANLNG...   | FD | PK         | DLVKP...EE  |
| psae      | IRN.TTRFLL | SNLNG...   | FD | PA         | DLLPP...QE  |
| psfl_1    | IRN.TARFLL | SNLTG...   | FN | PA         | DLLPA...ED  |
| xyfa      | IRN.TARFLL | GNLHG...   | FD | PT         | HLVPL...SD  |
| neme      | IRN.TLSFLF | ANLSD...   | FN | PI         | DAVQQ...AD  |
| buAPS     | IRN.TARFLL | ANISD...   | FD | PK         | NIISK...EN  |
| agtu      | LRN.TVRWML | GTLAH...   | DN | GE         | EIAY...AD   |
| sime      | LRN.TIRWML | GTLAH...   | DK | GE         | VVAL...SD   |
| melo      | LRN.TIRWML | GTLAH...   | DD | GE         | TVPL...EA   |
| cacr      | LRN.TMRYLL | GALAG...   | FD | EE         | RVTDY...DQ  |
| hepy26695 | FRN.TLKFLL | ANFSD...   | MD | LK         | LERP...HN   |
| hepyj99   | FRN.TLKFLL | ANFSD...   | MD | LK         | LERP...HD   |
| caje      | IRN.TIRFLL | ANTN...    | D  | LK         | LEV...KE    |
| thma      | IRN.TFRFLL | GNLED...   | FD | PE         | DRVPH...EK  |
| fepe      | LRN.TLRYLL | SNLYD...   | FT | E          | DLLPY...EK  |
| aqae      | IRN.TLRFII | GNLYD...   | FN | PR         | NALPF...EK  |

1151

1200

|       |            |            |           |            |            |
|-------|------------|------------|-----------|------------|------------|
| mask  | .....****  | ***        | .....     | .....      | .....****  |
| stau2 | RNTLDNWALS | RLNTLIKESN | IYVNNYDFT | SAARLINEYT | NTISNWIYIG |
| bace2 | RTKLDEWVLS | RLHSTTKKVR | TALDDYQFT | NAAREIATLV | DEVSNNWYVR |
| baan2 | RTKLDEWVLS | RLHSTTKKVR | TALDDYQFT | NAAREIAALV | DEVSNNWYVR |
| ocih  | KTTLDSWILS | RLNSVIKEVT | TSLDQYDIT | KGARSIALFV | DELSNNWYVR |

|       |             |            |             |            |              |
|-------|-------------|------------|-------------|------------|--------------|
| clpe  | DNVMDKWIMS  | KLNTLVKDVD | .DHLNNYRIT  | QAALIEEFT  | .DELSNWXVVR  |
| clac  | GNVMDKWIVS  | RLNTLTKDVG | .NYLDSYGIT  | QAALIEQDFV | .DDLSNWXVVR  |
| cldi  | RPELDRWILS  | KFNMLMKDVE | .ENLAIFELN  | KTLRMIQDFI | NDDLSNWXVIR  |
| pogi  | RPEIDRWILS  | ELNTLIREVD | .DQLSDYEPT  | RAGRAISDFV | SENLSNWXVVR  |
| bafr  | RPEIDRWILS  | VLNTLVKEVD | .TCYNEYEPT  | KAGRLISDFV | NDNLSNWXVVR  |
| feac  | SNLLDRWLLS  | RLNSTIENTR | .KNMDEFDMH  | IALRNIMDLI | .NDFSNYYL    |
| thvo  | KDTLDRWLLS  | KINTFIIESR | .RAYDDLDFH  | EVVRLSMDFV | .DNLSNFYLR   |
| thnw  | GNALDRYMVS  | KVNSFVRSSR | .DAYESLDFH  | EVVRASMEFV | .DDLSNFYLR   |
| cyhu  | RTESEDRWILS | KLQSLVKDVA | .DAYSDYEPT  | KAGRAIQDFV | VDDLSNWXVVR  |
| chte  | RSELEDRWVLS | SLNTLIAEVT | .SRMEQYDLT  | GACRLIGDFT | VDDLSNWXVIR  |
| dera  | RPEMDRWLLA  | RLEETVRDVT | .AALESYDAR  | SGGRALEGF. | VDDLSNWXVVR  |
| stco  | RPVLEDRWLLS | ELHALTDQVT | .QALDAYDTQ  | RAGKLLSAF. | VDDLSNWXVVR  |
| thth  | RPEMDRWLLA  | RMQDLIQRVT | .EALDAYDPT  | TSARALRDFV | VEDLSQWYVR   |
| deet  | VPELEDRWILS | ELNQLVLDVD | .KGLDNYDPT  | QAGRRIEDF. | VGYLSNWXVVR  |
| anga  | TNVMDVWIIS  | FKESLLKFVT | .EEMKAYRLY  | TVVPRLTKFI | .DQLTNWXVVR  |
| drme  | ASVIDRWILS  | FKESLLEFFA | .TEMKMYRLY  | TVVPRLTKFI | .DQLTNWXVVR  |
| hosa  | PNITDRWILS  | FMQSLIGFFE | .TEMAAYRLY  | TVVPRLVKFV | .DILTINWXVVR |
| cael  | ENVMDRWIES  | FTNSLVAFVR | .KEMDSYRLY  | AVVGPLTKFF | .DTLTNIYIR   |
| asfu  | TNVMDRWILA  | SCQSLLKFVN | .EEMAGYRLY  | TVVPRLLELI | .DNTTNWXVIR  |
| scpo  | SNVMDRWILA  | RCQSLIGFVD | .EEMKQYRLY  | TVVPQLLGLI | .EEMTNWXVIR  |
| sace  | .NVMDRWILA  | SMQSLVQFIH | .EEMGQYKLY  | TVVPKLLNFI | .DELTNWXVIR  |
| ledo  | TNEMDRWILA  | SCQSLLRYVK | .AEMRLYHLY  | NVVPGLRFRV | .GDLSNWXVVR  |
| lema  | TNEMDRWILA  | SCQSLLRYVK | .AEMRLYHLY  | NVVPGLRFRV | .GDLSNWXVVR  |
| arth  | ANILDQWIHS  | ATQSLVRFVR | .EEMDAYRLY  | TVVPRLKFL  | .DNLTNIXVVR  |
| teth  | TNPTDRWIII  | SCQNLINYVR | .IEMEKYHLY  | NVVPRLIHFL | .ENLTINWXVIR |
| encu  | SLPMDGWITA  | SFDNFAWSLT | .RKMRKYELS  | SVLTLALRFI | .DDLSNWXVIR  |
| nolo  | QTRMDDWILN  | TLNTFGNKVK | .RDMSKYMLQ  | GVMGYATSFV | .NDLSNWXVIR  |
| plfa  | N.IMDQWIFS  | SLQSLINSVH | .TEMKAYKLY  | NVLPKLLNFI | .ENLTINWXVIR |
| plyo  | NNIMDQWIFS  | SIQNLIKSVH | .YEMKQYKLY  | NVLPKLLNFI | .ENLTINWXVIR |
| chtr  | LAEIDRWILS  | SLYSLVGKTR | .ESMSQYDLH  | AAVNPFDVFI | .EDLTINWXVIR |
| chmu  | LAEIDRWILS  | SLYSLVGKTR | .ENMAQYDLH  | AAVSPFIDFI | .EDLTINWXVIR |
| chpn  | YTEIDQWILS  | NLYSVVGKVR | .ESMSQYHLN  | FAVEPFVTFI | .DDLTNWXVIR  |
| trde  | NNPLDLWILS  | VTEKLVADVT | .EALDKYDLS  | QAIPPMVEYI | .DLLNWXVIR   |
| trpa  | NNPLDRWILS  | LTEKLVQDIA | .CALDAYDVS  | KVADPIVSYV | .DQLNWXVIR   |
| bobu  | NNNLDKWIIS  | ELESKKILN  | .TEIDKYNLT  | KSIESLLEFI | .DKLNNWXVIR  |
| myle  | SHVLEDRYILA | KLAVLRDDLS | .QAMEVCDIS  | GACEQLRQFT | .EPLTNWXVLR  |
| mytu  | VHVLEDRYILA | KLAVLRDDLS | .ESMEVYDIP  | GACEHLRQFT | .EALTNWXVVR  |
| codi  | SDVLEDRYILA | KLHDVVAAGV | .DALDNTDIA  | RACDEVRTFC | .DALTNWXVVR  |
| ripr  | QNVLDVYILS  | KLKIAVNKIE | .ESLDNFDTQ  | TAYHAVSEFF | .EVLNNWXVIR  |
| rico  | KNVLDVYILS  | KLKIAVQKIE | .ESLDNFDTQ  | TAYHAVSAFF | .EVLNNWXVIR  |
| psfl  | DNVLDHYLLH  | ELAALESNIK | .MWMSLDFV   | KIYSRIEVFI | .NVLSTWYLR   |
| suso  | AKIEDLWILS  | RFNSMLKKVN | .ESMKDYKVH  | EMTNYLINFL | IEDVSRFYIR   |
| aepe  | LEVEDRWILS  | RLASLKRRYL | .TAMEDLRIH  | DAARALRSFI | IEDVSHWYLR   |
| arfu  | LKIEDRWILS  | RLESFIKEAN | .EAMEGYQVH  | RVVRAFFDFF | VEDFSRWYIQ   |
| meba  | LREEDRWILS  | RIQSVVKAVD | .EAMSGYFLH  | KAVREILEFT | LEDLSRWYIQ   |
| meth  | FRDEDRWIIS  | RVNSVALKVT | .EALDNLHFFH | RATREIHDFI | VEDLSRWYIR   |
| pyho  | FREEDKWILS  | RVNSLIREVE | .NGIETFYLT  | KATRALYNFV | VEDLSRWYVR   |
| pyfu  | FREEDKWILS  | RVNNLIKEVE | .NGIETFYLT  | KATRALYNFV | VEDLSRWYVR   |
| pyab  | FREEDKWILS  | RVNSLISEVE | .NGIESFYLT  | KATRALYNFV | VEDLSRWYVR   |
| meja  | .DEDRWIVS   | RINSVAKIAI | .ENLEVPYFH  | TYTWTLKDFI | LNDLSRWYIR   |
| haNRC | LETVDEWLLS  | RLQHVKADAT | .AHWEDFEQH  | RALDAVLEFV | VEDLSRYVQ    |
| pyba  | GLEEDKWILS  | ELNIMISEFT | .NFVKNFEFH  | KAAALWREFV | VETLSHRYIR   |



|           |            |             |            |            |            |
|-----------|------------|-------------|------------|------------|------------|
| bace1     | LREVDRYMLV | KLNDLITKVK  | .EAYETYDFA | AVYHAIHNFC | TIDLSSFYLD |
| baan1     | LREVDRYMLV | KLNDLITKVK  | .EAYETYDFA | AVYHAIHNFC | TIDLSSFYLD |
| bast      | LGEVDRYMLA | KLNKLIKVK   | .KAYDSYDFA | AVYHEMNHFC | TVELSAFYLD |
| basu      | LREVDQYMLI | KLNKLIDKVK  | .KAYDEYEFA | VVYHSIHNFC | TIELSSFYLD |
| baha      | LNGLDRYMLA | KLNDVINRVK  | .KAYDEYQFS | TVYHELHNFC | TIELSSFYMD |
| limo      | LREVDKYMLI | KLNDLVKVK   | .DSYEAFEF  | TIYHQINNFC | TVELSQFYMD |
| liin      | LREVDKYMLI | KLNDLVKVK   | .DSYEAFEF  | TIYHQINNFC | TVELSQFYMD |
| stau      | LLEVDRYLLN | RLREFTASTI  | .NNYENFDYL | NIYQEVQNF  | NVELSNFYLD |
| stpy      | LGTVDKYMTI | VFNQLVATIT  | .DAYERYDFM | AIYKAVNVFV | TVDLSAFYLD |
| stmu      | LRSVDKYMLI | KFNQLVSVIN  | .RAYSHYDFM | TIYKAVNVFV | TVDLSAFYLD |
| stpn      | LRSVDKYMTI | RFNQLVKTIR  | .DAYADFEFL | TIYKALVNF  | NVDLSAFYLD |
| lala      | LRPVDKYMLV | KFNELVKQIR  | .TAYDNYSFM | TVYKSIINF  | TNDLSSFYLD |
| enfa      | LRSVDKYMTV | RLNQVIQEI   | ENGYEKYNFM | HIYRTVMNFL | TVDLSSFYLD |
| syne      | LPELDRYMLH | RMTEVFTEVT  | .EAYESFQFF | KFFQTVQNF  | VVDLSNFYLD |
| arthchl   | LPIIDQHALF | QLENVVKNIQ  | .ECYENYQFF | KIFQIIQRFT | IVDLSNFYFD |
| prma      | LPLLDQWMLN | RLVEVSDEVT  | .IAYENYEF  | KFFQILQSFC | VVDLSNFYLD |
| mypu      | LEGIHELIN  | RLKKVKFDIL  | .QAYNDYDFN | DVIKTLTNFL | T.DLSSFYLS |
| myge      | FSLEDKIVIH | KTNSLVEQIE  | .KFLEKYNFL | GCLKVINKFV | L.WLSSWYFE |
| mypn      | FALEDKIVIH | KTNALVQELH  | .QWLKQYNFL | NCLKAINKFV | L.WLSGWYFE |
| urur      | VRQEEQFVLN | EFNELHIKVI  | .KAYENFDYQ | TVVKLFNKFI | L.DLSSWYFE |
| saty      | MVVLDRWAVG | CAKTAQQEIL  | .KAYEAYDFH | EVVQRLMRFC | SVEMGSFYLD |
| esco      | MVVLDRWAVG | CAKAAQEDIL  | .KAYEAYDFH | EVVQRLMRFC | SVEMGSFYLD |
| yepe      | MVVVDRWAVG | RAQAAQAEIM  | .EAYENYDFH | LVVQRLMQFC | SVEMGSFYLD |
| vich      | MVALDRWAVG | RALAAQOEII  | .QAYQDYNLH | AVVQRLMNFC | SIEMGSFYLD |
| hain      | MISLDRWAVA | CALDAQNEIK  | .DAYDNYQFH | TVVQRLMRFC | SVEMGSFYLD |
| acac      | MISLDRWAVA | CALEAQNEIK  | .DAYDNYQFH | AVVQRLMRFC | SVEMGSFYLD |
| pamu      | MMVLDRWAVD | CAYQAQNEIK  | .DAYDNYQFH | AVIQRLMKFC | SIEMGSFYLD |
| psae      | MLALDRWAVD | RALLLQREIE  | .EAYREYRFW | NVYSKVNFC  | VQELGGFYLD |
| psfl_1    | MLALDRWAVD | RTLALLQRELQ | .EHYGEYRFW | NVYSKIHNFC | VQELGGFYLD |
| xyfa      | MIALDRWIVH | RAFELQQTIK  | .AAYTRYDFA | EIVQTILNFC | SVDLGSFYLD |
| neme      | MVEIDRYALV | LARRLQERLA  | GDYYPRYAFH | FAVKDIVSFC | SEDLGAFYLD |
| buAPS     | MVLLDKWAIG | QTKIVQEEII  | .QHYNYNFHF | AVIQRLMYFC | SIEMGSFYLD |
| agtu      | LPELEKLVH  | RLSELDKVV   | .DGYDAFDFK | KITRALIDFA | NVELSAFYFD |
| sime      | MPELERLMLH | RLAELDRLVR  | .EGYDAFDFK | RIARALIDFS | NVELSAFYFD |
| melo      | MPELERLMLH | RLAELDEVVR  | .QGYDAFEFK | RITRALVDFM | VVELSAFYFD |
| cacr      | FPALEKYILH | RLWELDGQVR  | .EAYQSYRFS | DVIRPLIEFC | QGDLSALYFD |
| hepy26695 | FSPLDHFMLE | TLETISAGVN  | .SAFEEHDFV | KGLNILMAFV | TNELSGIYLD |
| hepyj99   | FSPLDHFMLE | ALETISAGVN  | .SAFEEHDLV | KGLNILMAFV | TNELSGIYLD |
| caje      | FSFIDKWILS | RATKVKFASK  | .EAFFAYEFA | KGFSLLLNFL | SADLSGIYLD |
| thma      | LLTIDRWALG | RLQEIIKTRAT | .EYDSEYEF  | KVYNLVVKYC | TTELSLYLD  |
| fepe      | LLPLDKWALG | RLQKFIEQIT  | .QYYEGFEYS | KVYNATVKYC | TTELSAVYLD |
| aqae      | LHHFDRWIIS | ELQNLLKKVH  | .ENYEKFLFY | RVHNHIKNFV | ITTLIAIYLD |

1201

1250

|       |            |            |            |            |            |
|-------|------------|------------|------------|------------|------------|
| mask  | *****...   | .....*     | *****      | *****.     | .....      |
| stau2 | DSRGRFWEQG | ISN.DKKDAY | NTLYEILTTL | SRLVAPFVPF | ISEKIHYNLT |
| bace2 | RSRNRFWESG | MNA.EKAAAY | ETLHEVLVTI | SKLIAPF'PF | VAEDIHLNLT |
| baan2 | RSRNRFWESG | MNA.EKAAAY | ETLHDVLVTI | SKLIAPF'PF | VAEDVHLNLT |
| ocih  | RSRQRFWSSG | MNE.DKKAAY | TTLHEVLSKL | TQLMAPYIPF | VADDIYTNLQ |
| clpe  | RNRARYWSEE | LTD.DKIGAY | TTLYRVLVTL | CKVAAPFVPF | ITEEIQNLV  |
| clac  | RNRSRYWTQE | LTD.DKVGAY | VTLYRVLVTL | SKVAAPFIPF | MTEQIQSLV  |
| cldi  | RSRRRFWATE | LTE.DKKAVY | NTTYELLHGL | CRAIAPFAPY | MSEEMYRNLT |

|       |                   |                 |             |             |              |
|-------|-------------------|-----------------|-------------|-------------|--------------|
| pogi  | LSRRRFWAGD        | MTE.DKLSAY      | QTLYTSLLTV  | SKLMAPISPF  | YADRLYRDLT   |
| bافر  | LNRKRFWGGG        | FTQ.DKLSAY      | QTLYTCLETV  | AKLMAPIAPF  | YADRLYSDLI   |
| feac  | LSRKRFWEGK        | LDD.EKKKAY      | ETLYYTLINI  | LKLLAPLAPF  | YTDYMYQKLS   |
| thvo  | LSRRRFWAED        | VTE.DKLAAY      | STLYTAIMTC  | SKVLAPIVPF  | VSDYLYLSLH   |
| thnw  | LSRRRFWAEG        | FDD.DKLSAY      | STLYYALKAF  | SEVMAPITPF  | FSDFIYLNLG   |
| cyhu  | LNRKRFWKGE        | YNA.DKTAAY      | QTLYTCLETV  | AKLGAPIAPF  | YMDKLFSDLN   |
| chte  | RSRKRFWKGE        | MGP.DKLSAY      | QTLSTVLETL  | AKLMAFVVPF  | IAEKIWLDLK   |
| dera  | RSRSRFWGEG        | GTV.D.TAAY      | ATLHEALLVV  | SQLTAPF'PPF | LADALYRNLS   |
| stco  | RSRRRFWQGG        | . . . .D.KAAL   | RTLHEVVETV  | TKLMAPLTPF  | ITERVWQDLV   |
| thth  | RNRKRFWKNE        | DAL.DREAAY      | ATLYEALVLV  | ATLAAPF'PPF | LAEVLWQNLV   |
| deet  | RSRRRFWKSE        | NDA.DKLSAY      | QALYTCLVTL  | SRLAPF'PPF  | VAEELYQNLV   |
| anga  | MNRKRIKGEY        | GVE.DCYHAL      | DTLYDVLLAM  | VKMMAPF'TPY | LTEFMYQRLR   |
| drme  | LNRKRIKGEY        | GAD.QCIQSL      | DTLYDVLYTM  | VKMMAPF'TPY | LTEYIFQRLV   |
| hosa  | MNRRLKGEN         | GME.DCVMAL      | ETLFSVLLSL  | CRLMAPYTPF  | LTELMYQNLK   |
| cael  | LNRKRVKGDN        | GLH.EQHHAL      | AALGRVLILI  | VRLMAPF'PPF | FCEYIWLNLK   |
| asfu  | FNRKRLKGEN        | GID.DTLHAL      | NTLFEVLYTL  | VRGLAPF'PPF | ITDTIYQKLL   |
| scpo  | FNRRLKGED         | GEI.ETINAL      | NVLFVLF'FTL | VRIMGPF'PPF | ITENIYQHLL   |
| sace  | FNRRLKGEN         | GVE.DCLKAL      | NSLFDALFTF  | VRAMAPF'PPF | LSESIYLRK    |
| ledo  | MNRRLMKNAT        | DSE.DRSQAL      | STMLYLLFSV  | SRIVGHIAP.  | . . PPVYERL. |
| lema  | MNRRLMKNAT        | DSE.DRSQAL      | STMLYLLFSV  | SRIVGHIAP.  | . . PPVYERL. |
| arth  | FNRKRLKGRT        | GED.DCHTAL      | STLNFVLLTS  | CKVMAPF'PPF | FTETLYQNLR   |
| teth  | LNRNRLKGDY        | GLE.EQETSL      | NVLFNVILNS  | TILMSPLVPF  | ITESFYQNLR   |
| encu  | MYRKEIR. . . . .  | . . . . .AGHH   | AVLGEILKKF  | SIVMGPF'PPF | FSEYSYQSLN   |
| nolo  | LN. . . . .       | . . . . .       | . . . . .   | . . . . .   | . . . . .    |
| plfa  | LNRDRMRGML        | GKE.NTHQSL      | NVLCRTLYLF  | TIIMAPF'PPF | ISEYIYQFLK   |
| plyo  | LNRDRMRGVI        | DEI.NCLMSL      | NTIYKTYLYF  | TLMMSPF'PPF | ISEYIYKMLQ   |
| chtr  | RSRRRFWDAE        | DSA.DRRAAF      | STLYEVLVVF  | SKVIAPF'PPF | IAEDMYQQLR   |
| chmu  | RSRRRFWESE        | DSP.DRRAAF      | ATLYEVLVVF  | SKIIAPF'PPF | TAEDMYQQLR   |
| chpn  | RCRRRFWEAE        | DTP.DRRAAF      | STLYEVLTVF  | CKVIAPFVVPF | LAEDIYQKLL   |
| trde  | RSRRRFWKSE        | NDG.DKSQAY      | ETLYRALKKF  | SLVAAPVVPF  | ITESIWQNLR   |
| trpa  | RSRRRFWKSI        | NDE.DKRCAY      | NTLYCVLKRC  | VLAIAPVVPF  | ITESIWQNIR   |
| bobu  | RSRRRFWKSE        | NDK.DKNDAY      | ETLYYAIKTL  | MILLAPF'PPF | ITEEYIYQNLK  |
| myle  | RSRARFWD. . . . . | . . . . .EDVDI  | DTLHTVLEVT  | ARLAAPLLPL  | ITEIWRSVT    |
| mytu  | RSRSRFWA. . . . . | . . . . .EDADAI | DTLHTVLEVT  | TRLAAPLLPL  | ITEIWRGLT    |
| codi  | RSRDRFWAG. .DT.   | .EHPEAF         | YTLYTVLETL  | TRVTAPLLPM  | VSEVIWRGLT   |
| ripr  | RSRARFWKNE        | KDT.DKQNAY      | NTLYSCLKIM  | TIAMSALIPM  | ISETIYQGLH   |
| rico  | RSRARFWKSA        | KDT.DKQNAY      | NTLYSCLDTM  | AIAMSALVPM  | ISEAIYKGLR   |
| psfl  | LNKARIWRDG        | LDD.DKRQCY      | EVLHYALS NF | ARLLAPFMPF  | LAEAVYTELG   |
| suso  | LIRKRAWIEA        | NTQ.DKIAMY      | YILYYILKQW  | IILASTIIPF  | ISEKIYKSFV   |
| aepe  | IIRRRVWEEV        | DTP.SKRAAY      | ATLYKVLWEW  | LLMAAPLIPY  | TAEYLYIKVF   |
| arfu  | IIRPRVWEER        | DSP.SKLAAY      | YTMFRVIDRS  | LRAIAPFAPL  | IAEFYQHVV    |
| meba  | LIRPRTWTEA        | DDP.DKLAAY      | RVLYEVYVTL  | TKLISPFMPY  | LAEEMYQNL    |
| meth  | LIRSRTWIER        | DDP.DKLAAY      | HSLY TALKTL | IVTLSPIAPH  | VCEDIYQNLV   |
| pyho  | LIRKRLWVEG        | DDP.DKLAAY      | YTLWKVFDVL  | LRLMAPF'TPY | ITEEYIYQNL   |
| pyfu  | LIRKRLWVEG        | DDP.DKLAAY      | YTLWKVFDVL  | LRLMAPF'TPY | ITEEYIYQNL   |
| pyab  | LIRKRLWVEG        | EDP.DKLAAY      | YTLWKVFDVL  | LRLMAPF'TPY | IAEEYIYQNL   |
| meja  | LIRDRTWKEK        | DDA.DKLAAY      | QTLYYVLLKL  | ATILAPVAPH  | TAEAIYQNLK   |
| haNRC | VVRERMWEDD        | ASA.SKTAAY      | ATMQRVLLV   | VALLAPYAPF  | VTEELYSHLT   |
| pyba  | LLRRRVWSEE        | PSP.DKYAAY      | AVLHDVLKKV  | LILGSILVPF  | ITEYLVQAYV   |
| bacel | FAKDILYIEG        | ANHEDRRAIQ      | TVLYDVLVAL  | TKLVTPILPH  | TADEVWPYIP   |
| baan1 | FAKDILYIEG        | ANHEDRRAIQ      | TVLYDVLVAL  | TKLVTPILPH  | TADEVWPYIP   |
| bast  | MAKDILYIEA        | ADSRARRAVQ      | TVLYETVVAL  | AKLIAPILPH  | TADEVWEHIP   |

|           |            |            |            |            |            |
|-----------|------------|------------|------------|------------|------------|
| basu      | FAKDIVYIEH | ADHPDRRSMQ | TVSYETLLAL | VKLSAPILPH | TADELWSHLT |
| baha      | IAKDTLYVKH | ADHPDRRATQ | TVMYDVLVAL | AKLLSPIIPH | TADEVWKHIP |
| limo      | FAKDVVYIEA | ADSHDRRAMQ | TVFYEAVVTL | TKLLAPILPH | TTEEVWNSLI |
| liin      | FAKDVVYIEA | ADSHDRRAMQ | TVFYEAVVTL | TKLLAPILPH | TTEEVWNSLI |
| stau      | YGKDILYIEQ | RDSHIRRSMQ | TVLYQILVDM | TKLLAPILVH | TAEVWSHTP  |
| stpy      | FAKDVVYIEA | ANSLERRRMQ | TVFYDILVKI | TKLLTPILPH | TTEEIWSYLE |
| stmu      | FAKDVVYIEA | ADDLARRQM  | TVFYEILVNI | TKLLTPILPH | TSEEIWSYLE |
| stpn      | FAKDVVYIEG | AKSLERRQM  | TVFYDILVKI | TKLLTPILPH | TAEIWSYLE  |
| lala      | FAKDVVYIEA | ANSPERRSMQ | TVMYVILKDL | VKILVPILPH | TAEETWTYLE |
| enfa      | FAKDVVYIEA | ENDYQRRCMQ | TVFYQTLVSL | TKLLTPIIPH | TAEIWSFLQ  |
| syne      | IAKDRLYISA | PNAPRRRSCQ | TILQLALENL | TKAIAPVLCH | LAEDIWQFLP |
| arthchl   | IAKDRLYTGG | TSSFTRRSCQ | TVLSTHLLSI | LRVIAPIVPH | LAEDVWQNL  |
| prma      | IAKDRLYVSA | KTQFRRRSCQ | FVMSRIVENL | AVIISPVLCH | MAEDIWQNI  |
| mypu      | ISKDSLYADK | INSKERMMIQ | YNMYNILEAT | LVVIAPIMPT | TAEDAYDNFN |
| myge      | IIKDTLYCDA | KNNPNRLAKQ | AVLNYIFTQL | ISFLNIFIPH | TAEDAWKNYS |
| mypn      | IIKDTLYCDA | KTNPNRVAKQ | AVLNYIFTQL | IGFLNIFIPH | TAEDAWQNYL |
| urur      | NIKDDMYCLA | INDPIRKQIQ | SAVYWILKNS | LIDLTPIIPH | TTEEAYSFLK |
| saty      | IIKDRQYTAK | ADSVARRSCQ | TALYHIAEAL | VRWMAPIMSF | TADEIWGYLP |
| esco      | IIKDRQYTAK | ADSVARRSCQ | TALYHIAEAL | VRWMAPILSF | TADEVWGYLP |
| yepe      | IIKDRQYTAK | GDGIARRSCQ | TALFHIAEAL | VRWMAPIMSF | TADEIWNHLP |
| vich      | VIKDRQYTAK | RGGHAQRSCQ | TALFFIVEAL | VRWMAPIMSF | TADEIWNAMP |
| hain      | IIKDRQYTTK | ADSLARRSCQ | TALWHIAEAL | VRWMAPILSF | TADEIWQHLP |
| acac      | IIKDRQYTTK | ADSLARRSCQ | TALWHIAEAL | VRWMAPILSF | TADEIWGHLP |
| pamu      | IIKDRQYTTK | ADSLARRSCQ | TALWHIAEAL | VRWIAPVLSF | TADEIWQYIP |
| psae      | IIKDRQYTTG | ANSVARRSCQ | TALFHIAEAL | VRWIAPILAF | TAEVWKFLP  |
| psfl_1    | IIKDRQYTTG | ANSKARRSAQ | TALYHISEAL | VRWIAPILAF | TADELWEYLP |
| xyfa      | VTKDRLYTMR | EDAPGRRSAQ | TAMYHLTAAF | VRWIAPILSF | TADELWSYLP |
| neme      | ILKDRLYTTK | ADSRARRSAQ | TALYHITRSL | VLLIAPILCF | TGEEAWDIIG |
| buAPS     | IIKDRQYTLK | KHSQERRSSQ | TAIYYIINSL | VRWIAPILSF | TADEIWSYLP |
| agtu      | IRKDTLYCDA | PSSLKRRASL | SVIAKLFDCL | VTWLAPMLPF | TTEEAWLSRY |
| sime      | IRKDALYCDA | PSSLRRRAAL | QVIRTLFDCL | VTWLAPMLPF | TAEAWLSRN  |
| melo      | IRKDALYCDA | PSSVKRKASV | QVVRHLFDCL | VKWLAPMLPF | TMEEAWLDRH |
| cacr      | VRRDSLYCDR | PDALKRRAYR | TALDYVFDRL | TIWLAPLASF | TMEEAWTTRF |
| hepy26695 | ACKDSLYCDS | KNNEKRQAIQ | MVLLATASKL | CYFLAPILTH | TIEEVLEHSQ |
| hepyj99   | ACKDSLYCDS | KNNEKRQAIQ | MVLLAVASQL | CYFLAPILTH | TIEEVLEHSQ |
| caje      | ISKDRLYCDS | ENAQRKSAQ  | VAMALMAKEL | LNLLAPNLSY | SVDEALEHAN |
| thma      | VVKDRLYVEA | KDSIYRRSAQ | TVMHEILISL | MKILAPIMTF | TMEEVYSHLH |
| fepe      | ILKDRLYVEA | KDSIYRRSAQ | TALHYILEAL | IKILAPIIPF | TAEAYQESH  |
| aqae      | VLKDRLYVYA | PASWERRSAQ | TALWHLLIAL | TTSTAPYLSF | TAEELWEHVG |

1251

1300

|       |          |       |         |             |          |
|-------|----------|-------|---------|-------------|----------|
| mask  | .....    | ..... | .....   | .....       | .....    |
| stau2 | G.....   | ..... | .....   | .....K..    | .....SVH |
| bace2 | G.....   | ..... | .....   | .....S..    | .....SVH |
| baan2 | G.....   | ..... | .....   | .....S..    | .....SVH |
| ocih  | G.....   | ..... | .....   | .....D..    | .....SVH |
| clpe  | VNL..... | ..... | .....DE | .....NALE.. | .....SIH |
| clac  | TSI..... | ..... | .....NE | .....GAEE.. | .....SVH |
| cldi  | G.....   | ..... | .....   | .....EV..   | .....SVH |
| pogi  | GKD..... | ..... | .....E. | .....       | .....SVH |
| bafr  | GVT..... | ..... | .....GR | .....DNVV.. | .....SVH |
| feac  | G.....   | ..... | .....   | .....PEK..  | .....TIH |

|       |            |            |            |            |            |            |           |
|-------|------------|------------|------------|------------|------------|------------|-----------|
| thvo  | G.....     | .....      | .....      | .....      | PYE..      | .....      | SIH       |
| thnw  | G.....     | .....      | .....      | .....      | DKE..      | .....      | SVH       |
| cyhu  | QVS.....   | .....      | .....      | KK         | NAVE..     | .....      | SVH       |
| chte  | SVG.....   | .....      | .....      | GT         | SKAE..     | .....      | SVH       |
| dera  | .....      | .....      | .....      | .....      | GEES..     | .....      | SVH       |
| stco  | VPV.....   | .....      | .....      | TP         | GAPE..     | .....      | SVH       |
| thth  | RSV.....   | .....      | .....      | RL         | EAKE..     | .....      | SVH       |
| deet  | LSA.....   | .....      | .....      | DP         | SALE..     | .....      | SVH       |
| anga  | LLS.....   | .....      | .....      | SE.        | PMDG..     | .....      | SVH       |
| drme  | LFQ.....   | .....      | .....      | PAG        | TLEHAD..   | .....      | SVH       |
| hosa  | VLI.....   | .....      | .....      | DPV        | SVQDKDTL   | .....      | SIH       |
| cael  | KVI.....   | .....      | .....      | GS.        | TEE..      | .....      | SVH       |
| asfu  | PHI.....   | .....      | .....      | PQA        | LRGEDSR    | .....      | SVH       |
| scpo  | NYM.....   | .....      | .....      | PID        | KNEISLR    | .....      | SVH       |
| sace  | EYI.....   | .....      | .....      | PEA        | VLAKYGKDGR | .....      | SVH       |
| ledo  | .....      | .....      | .....      | .....      | D..        | .....      | SVH       |
| lema  | .....      | .....      | .....      | .....      | D..        | .....      | SVH       |
| arth  | KAC.....   | .....      | .....      | KG.        | SEE..      | .....      | SVH       |
| teth  | KVI.....   | .....      | .....      | PKG        | SSYLEE     | .....      | SIH       |
| encu  | PGE.....   | .....      | .....      | .....      | .....      | .....      | SVH       |
| nolo  | .....      | .....      | .....      | .....      | .....      | .....      | .....     |
| plfa  | NIK.....   | .....      | YTNN       | QNMEHNENNE | TTNIKEEDLN | .....      | RNDIHKSVH |
| plyo  | QVQGFNLVMS | SDTHKNVQNG | QNVQNDQNGQ | NVQNGQNDQN | DQNDQNKSVH | .....      | .....     |
| chtr  | GET.....   | .....      | .....      | .....      | DPE..      | .....      | SVH       |
| chmu  | VET.....   | .....      | .....      | .....      | DPE..      | .....      | SVH       |
| chpn  | LEK.....   | .....      | .....      | .....      | EPE..      | .....      | SVH       |
| trde  | TES.....   | .....      | .....      | .....      | DAL..      | .....      | SIH       |
| trpa  | AAD.....   | .....      | .....      | .....      | DVQ..      | .....      | SVH       |
| bobu  | TDE.....   | .....      | .....      | .....      | DKQ..      | .....      | SIH       |
| myle  | G.....     | .....      | .....      | .....      | .....      | .....      | GRSVH     |
| mytu  | R.....     | .....      | .....      | .....      | .....      | .....      | ERSVH     |
| codi  | G.....     | .....      | .....      | .....      | .....      | .....      | ERSVH     |
| ripr  | N.....     | TAI        | T.....     | ..QLNCLLSE | GKHIVQNPMS | DTQDYNTSVH | .....     |
| rico  | HCEERNDTAL | SGKSNIIARK | DTSLDKAISG | VSHKIATALS | VPRNDAISVH | .....      | .....     |
| psfl  | Y.....     | .....      | .....      | .....      | .....      | .....      | ADSVH     |
| suso  | VNAK.....  | .....      | .....      | .....      | .....      | .....      | ESVS      |
| aepe  | REAEE..... | .....      | .....      | .....      | RPE..      | .....      | ESIH      |
| arfu  | KEFR.....  | .....      | .....      | .....      | EGE..      | .....      | ESIF      |
| meba  | RNVDP..... | .....      | .....      | .....      | NAL..      | .....      | ESVH      |
| meth  | RGAEF..... | .....      | .....      | .....      | DSP..      | .....      | ESIH      |
| pyho  | RPF.....   | .....      | .....      | .....      | IGI..      | .....      | ESVH      |
| pyfu  | RPF.....   | .....      | .....      | .....      | TGI..      | .....      | ESVH      |
| pyab  | RPF.....   | .....      | .....      | .....      | TNV..      | .....      | ESVH      |
| meja  | T.....     | .....      | .....      | .....      | EDM..      | .....      | EESI      |
| haNRC | GD.....    | .....      | .....      | .....      | RGY..      | .....      | DTVH      |
| pyba  | RKYEK..... | .....      | .....      | .....      | NAP..      | .....      | ESVH      |
| bacel | GVT.....   | .....      | .....      | .....      | E..        | .....      | ESVQ      |
| baan1 | GVT.....   | .....      | .....      | .....      | E..        | .....      | ESVQ      |
| bast  | NRR.....   | .....      | .....      | .....      | EN..       | .....      | VESVQ     |
| basu  | FVE.....   | .....      | .....      | .....      | E..        | .....      | QSVQ      |
| baha  | GVE.....   | .....      | .....      | .....      | E..        | .....      | ESVQ      |
| limo  | GEG.....   | .....      | .....      | .....      | A..        | .....      | ESIH      |

|           |            |       |       |       |        |       |         |
|-----------|------------|-------|-------|-------|--------|-------|---------|
| liin      | GEG.....   | ..... | ..... | ..... | A..    | ..... | ESIH    |
| stau      | HVK.....   | ..... | ..... | ..... | E..    | ..... | ESVH    |
| stpy      | HES.....   | ..... | ..... | ..... | E..    | ..... | AFVQ    |
| stmu      | HEE.....   | ..... | ..... | ..... | E..    | ..... | AFVQ    |
| stpn      | FET.....   | ..... | ..... | ..... | E..    | ..... | DFVQ    |
| lala      | HEP.....   | ..... | ..... | ..... | E..    | ..... | NFAY    |
| enfa      | EE.....    | ..... | ..... | ..... | E..    | ..... | EYVQ    |
| syne      | YEKP.....  | ..... | ..... | ..... | TES.   | ..... | VF      |
| arthchl   | FEYR.....  | ..... | ..... | ..... | NEDG   | ...   | SAAEFVF |
| prma      | YSTI.....  | ..... | ..... | ..... | EKS.   | ..... | VF      |
| mypu      | KQDK.....  | ..... | ..... | ..... | QE..   | ..... | SVH     |
| myge      | FNKK.....  | ..... | ..... | ..... | PI..   | ..... | SVN     |
| mypn      | LPKK.....  | ..... | ..... | ..... | PV..   | ..... | SVN     |
| urur      | DANK.....  | ..... | ..... | ..... | KE..   | ..... | SIR     |
| saty      | GE.....    | ..... | ..... | ..... | R..    | ..... | EKYVF   |
| esco      | GE.....    | ..... | ..... | ..... | R..    | ..... | EKYVF   |
| yepe      | GE.....    | ..... | ..... | ..... | R..    | ..... | QQYVF   |
| vich      | AQQAD..... | ..... | ..... | ..... | GSAR.. | ..... | DKFVF   |
| hain      | QTE.....   | ..... | ..... | ..... | SAR..  | ..... | AEFVF   |
| acac      | KTT.....   | ..... | ..... | ..... | APR..  | ..... | AEFVF   |
| pamu      | .....      | ..... | ..... | ..... | GER..  | ..... | GEFVF   |
| psae      | GE.....    | ..... | ..... | ..... | R..    | ..... | AESVM   |
| psfl_1    | GE.....    | ..... | ..... | ..... | R..    | ..... | NESVM   |
| xyfa      | GD.....    | ..... | ..... | ..... | H..    | ..... | ADNVL   |
| neme      | GG.....    | ..... | ..... | ..... | E..    | ..... | EDSVL   |
| buAPS     | EN.....    | ..... | ..... | ..... | N..    | ..... | SQYVF   |
| agtu      | PD.....    | ..... | ..... | ..... | .....  | ..... | AESVH   |
| sime      | PQ.....    | ..... | ..... | ..... | .....  | ..... | AVSVH   |
| melo      | PD.....    | ..... | ..... | ..... | .....  | ..... | AVSVH   |
| cacr      | PE.....    | ..... | ..... | ..... | .....  | ..... | AGPVA   |
| hepy26695 | ALR.....   | ..... | ..... | ..... | IFLQ.. | ..... | AKDVF   |
| hepyj99   | VLR.....   | ..... | ..... | ..... | AFLQ.. | ..... | AKDVF   |
| caje      | VL.....    | ..... | ..... | ..... | IKGD.. | ..... | AKDVF   |
| thma      | EKD.....   | ..... | ..... | ..... | RK..   | ..... | YKTVQ   |
| fepe      | LK.....    | ..... | ..... | ..... | R..    | ..... | YESVH   |
| aqae      | KLDP.....  | ..... | ..... | ..... | SL..   | ..... | PESVF   |

1301

1350

|       |            |       |       |            |            |            |   |
|-------|------------|-------|-------|------------|------------|------------|---|
| mask  | .....      | ..... | ..... | .....      | .....      | .....      | ~ |
| stau2 | LQDYPQYKES | ..... | FINQ  | ALEDEMHTVI | KIVELSRQAR | KNADLKIKQP |   |
| bace2 | LEDYPVVNES | ..... | LLQP  | KLEAEMDAVL | QVVELGRSNR | NQHSLKVKQP |   |
| baan2 | LEDYPVVNES | ..... | LLQP  | KLEAEMDAVL | QVVELGRSNR | NQHSLKVKQP |   |
| ocih  | VSDFPKVDEA | ..... | AIDE  | KLEADMQGVL | EVIEGARSLR | NEVNIKTKQP |   |
| clpe  | LGAWPEVDEK | ..... | AIDK  | KLEEKMDLAY | KIVKLGRSAR | NGANIKNRQP |   |
| clac  | LCKWPEYDES | ..... | LIDS  | SLEEMKLAI  | SIVKLGRSAR | NGANIKNRQP |   |
| cldi  | LAEYPKCNEE | ..... | LVDT  | KLEEKMDLAK | NLVTLGRASR | EVERIKVRQP |   |
| pogi  | LALFPRPDQS | ..... | QVDR  | ALEQSMQMAQ | QISSMVLALR | RRVNLKVRQP |   |
| bafr  | LAKFPEYNEK | ..... | MVDK  | ELEAQMQMAQ | DVTSMVLALR | RKVNIKVRQP |   |
| feac  | SEKYPEPDNN | ..... | YIDS  | DLEKEFKYAI | SIMELSRRAR | QESNIKGRQV |   |
| thvo  | LDSFPEPDTS | ..... | KIDH  | DLEKRMDQAY | SVIETVRRIR | QEINIKGRQP |   |
| thnw  | LEAFPEFDST | ..... | LMDE  | KLESEMDRAY | SVIETVRRLR | QENSIGRQP  |   |
| cyhu  | LADFPKVNEA | ..... | FLDV  | ELEERMSLAQ | RISLVLHSIR | KAQTIKVRQP |   |

|       |            |        |       |            |            |              |
|-------|------------|--------|-------|------------|------------|--------------|
| chte  | LADWPVADES | .....  | CIDA  | ALEERMKKAQ | IITSLVRTMR | EKAGIKVRQP   |
| dera  | LTPWPTVRAE | .....  | RLDR  | KLADMAAVM  | KVVELGRAVR | GAHNLKTRQP   |
| stco  | LSSWPEADLT | .....  | AIDP  | ELSKQMLVR  | RLVELGRATR | AESGVKTRQP   |
| thth  | LADWPEADPA | .....  | LADE  | ALVAQMRAVL | KVVDLARAAR | AKSGV.....   |
| deet  | LTDFPVADTA | .....  | LIDE  | QLDNEIRLVM | KVSSMGRSAR | SKAALKVRQP   |
| anga  | YQMMPCSNGR | .....  | YINV  | AIERAVARMQ | AVVELGRVMR | DRRTMPIKYP   |
| drme  | YQMMPVSQKK | .....  | FIRN  | DIERSVALMQ | SVVELGRVMR | DRRTLVPKYKYP |
| hosa  | YLMLPRVREE | .....  | LIDK  | KTESAVSQMQ | SVIELGRVIR | DRKTIPIKYP   |
| cael  | FLMLPKPDES | .....  | LIDE  | TVERRVEVMR | NVIDLVRLVR | DREGLAVKYKYP |
| asfu  | FLSFPEVREE | .....  | LFDE  | VVERRVARMQ | KVIEMARVSR | ERRSIGLKSP   |
| scpo  | FLPFPTYKSE | .....  | LDDE  | TVLRRVKRMQ | TIIELARYVR | EQNNISLKTP   |
| sace  | FLSYPVVKE  | .....  | YFDE  | AIETAVSRMQ | SVIDLGRNIR | EKKTISLKTP   |
| ledo  | YLMIPDEDAS | .....  | LDDP  | ELERAMSRMM | NIVDLVRVLR | DQMVIPIKRP   |
| lema  | YLMIPDEDAS | .....  | LDDP  | ELERAMSRMM | NIVDLVRVLR | DQMVIPIKRP   |
| arth  | YCSIPPREG. | .....  | MEGE  | RIELSVTRMM | KIIDLARNIR | ERNKLPLKTP   |
| teth  | FLRIPTPKQE | .....  | LLDE  | KIERNFERMQ | NIINFARTLR | EKRKVSCLKQP  |
| encu  | FQEYPVCKNG | .....  | ..... | ..THPFEMAK | SIIAAVRRLR | ETNSISLKTP   |
| nolo  | .....      | .....  | ..... | .....      | .....      | .....        |
| plfa  | FIMLPQVDDK | Y..... | IIKY  | EFIELIEHMK | DVILLGRNLR | EKRKTPNKKP   |
| plyo  | FHMLPEVDDN | Y..... | TIRY  | EIIELIEKMK | SVIILGRILR | EKRKCPNKRK   |
| chtr  | LCDFPHVVLE | K..... | ILP.  | DLERKMQDIR | EIVALGHSLR | KEHKLKVRQP   |
| chmu  | LCDFPHVVLE | K..... | ILP.  | DLEKKMQDIR | EIVALGHSLR | KEHKLKVRQP   |
| chpn  | LCDFPQVEMD | K..... | ILP.  | DLEKRMHDIR | EIVGLGHSLR | KEHKLKVRQP   |
| trde  | LADYDPYNEK | .....  | IRNS  | ELEFKMKTVO | KAVSMGRALR | YQFNLKIRQP   |
| trpa  | LADYPVCTPM | .....  | VRDD  | ALEFKMETVQ | RVVSMARAIR | AQCNLKVRQP   |
| bobu  | LNDYPKANEN | .....  | FINK  | TIEEKINLAR | KITSMARSLR | SLHNIKIRMP   |
| myle  | LTDWQANQL  | .....  | PADP  | DLVAVMDQVR | QVCSAASSLR | KAKKLRVRLP   |
| mytu  | LTDWQAPDLL | .....  | PSDA  | DLVAAMDQVR | DVCSAASSLR | KAKKLRVRLP   |
| codi  | LADFPQADQF | .....  | PADD  | DLVRAMDEV  | GVCSATSSVR | KAHKLRNRLP   |
| ripr  | LCNYPTLSDF | .....  | EINY  | ELVSTMDNVL | DICSNSLFIR | STENIRVRQP   |
| rico  | LCNYPTLSDF | .....  | EINH  | ELVATMDNVL | DICSNSLFIR | STENIRVRQP   |
| psfl  | LQDWPSIDRQ | .....  | YLSY  | ELADEMSSLR | NLIASVRNVR | ETNGVSQKFP   |
| suso  | MESSINYDER | .....  | FIDN  | ELERAFFEV  | EINEASLNAR | AKAGIKLRWP   |
| aepe  | MLDMPEPEDH | .....  | LIDS  | TLEEDMEKAR | MVLEAILSAR | NEAGLKLRRP   |
| arfu  | MEEYSTAEVE | .....  | MIDG  | ELEAAMKVA  | EIVEAANAR  | NKAKRKLWRP   |
| meba  | MCDWPKVNEA | .....  | YLDP  | ELEAAMSTAR | SIVEAASNAR | QKAGRKLWRP   |
| meth  | MLDW.MVSED | .....  | AVDG  | KLEAEMDIV  | EIIEACARAR | DTARYKLWRP   |
| pyho  | MLDWPKVDES | .....  | AVDE  | DLEKEMEFIR | RIVEAGSAAR | QKARIKLRYKYP |
| pyfu  | MLDWPKPDES | .....  | AVDE  | ELEREMEFIR | RIVEAGSAAR | QKAKIKLRYKYP |
| pyab  | MLDWPKVDEK | .....  | AIDE  | ELEREMEFIR | RIVEAGSAAR | QRAKIKLRYKYP |
| meja  | FMNKIEVDEE | .....  | FIDE  | ELERDMAIVR | DVVDIYRGR  | DRIKYTLRYKYP |
| haNRC | MADWPTVEES | .....  | LRAP  | ALEADVAVLR | AAEEAGSHAR | QQAGRKLWRP   |
| pyba  | LAQYPAAG.. | .....  | SYDK  | ELIYAYRELF | AVFSALAEAR | NKAGIKLRWP   |
| bacel | LTDMPEAVQL | DGA..  | EALKT | KWDAFMTRLR | DVLKALEVAR | .NEKVIKSL    |
| baan1 | LTDMPEAVQL | DDA..  | EALKT | KWDAFMTRLR | DVLKALEVAR | .NEKVIKSL    |
| bast  | LTDMPEPIAI | DGE..  | EALLA | KWDAFMVDR  | DMLKALENAR | .NEKVIKSL    |
| basu  | LTDMPETITV | PNS..  | EATEE | KFDRFMALRD | DVLKALETAR | .NEKIIGKSL   |
| baha  | LTDMPEPIEL | GDV..  | SELKQ | KWDAFINVRD | DVLKALENAR | .NEKVIKSL    |
| limo  | LQDLDPVKVL | ANS..  | EEITA | KWDAFMQIRD | NVQKALEFAR | .NEKLIKSM    |
| liin  | LQDLDPVKVL | ADS..  | EEITA | KWDAFMQIRD | NVQKALEFAR | .NEKLIKSM    |
| stau  | LADMPKVVEV | D....  | QALLD | KWRTFMNLRD | DVNRALETAR | .NEKVIKSL    |
| stpy  | LAEMPVAETF | SAQ..  | EDILE | AWSAFMTRLT | QAQKALEEAR | .NAKIIGKSL   |

|           |            |             |             |            |             |
|-----------|------------|-------------|-------------|------------|-------------|
| stmu      | LAEMPEAQEF | ANQ..DEILD  | TWSAFMSLRD  | QAQKALEEAR | .NAKIIGKSL  |
| stpn      | LSELPEVQTF | ANQ..EEILD  | TWAAFMDFRG  | QAQKALEEAR | .NAKVIKSL   |
| lala      | LAEMPEAAEI | PGS..EELLG  | NWQEFLLDFRD | KILKALESAR | .EAKLIGKSL  |
| enfa      | LAEFPGYETF | TNE..EELMD  | TWAAFMDFRD  | NVLKALEEAR | .HSKLIGKSL  |
| syne      | QSGWVNLDQA | WQ..QPQLAQ  | KWVSLRQLRD  | GINQLLEQAR | .RDKVIGSSL  |
| arthchl   | ELKWPTLNEQ | WLSFPAEDVL  | FWQRLLELRT  | EVNKVLELAR | .NEKMIGSSL  |
| prma      | ERRWPKFPES | WLN..PELNE  | HISNLRTLRLV | EINKAIEGCR | .TQQMIGAAL  |
| mypu      | LEKMFEATIA | D...DKLEK   | TWKEFFDLKD  | EVYKEIEVEI | .ANKKIKRTN  |
| myge      | LFTKPTVFKV | ANS..KNLGN  | IYKTFTSIKN  | AAFKEIEKLR | .KEGLISKNN  |
| mypn      | LFAGPAMFKV | ANV..KGLDR  | LHESFSAIKD  | RAYAAIEQAR | .QNGVITKNN  |
| urur      | LEDFYDQSQF | QFK..KGIAH  | VKAFFS.IKD  | QIFNELENAR | .KNNILKKN   |
| saty      | TGEWYDGLFG | LEENEEFNDA  | FWDDVRYIKD  | QVNKELENQK | .ANG.IKSNL  |
| esco      | TGEWYEGFLG | LADSEAMNDA  | FWDELLKVRG  | EVNKVIEQAR | .ADKKVGGSL  |
| yepe      | TEEWYDGLFG | LAGNESMNDT  | FWAELLKVRG  | EVNKVLEQAR | .SDKRIGGSL  |
| vich      | TTEWFDGLFG | LAEGEELNNA  | FWNDIQKVRG  | SVNKLLENAR | .NEKLIGGSL  |
| hain      | TEEFYQGLFG | LGEDEKLDDA  | YWQQLIKVRS  | EVNRVLEISR | .NNKEIGGGL  |
| acac      | TEEFYEGFLS | LGENEKLDDA  | YWQTLIKVRS  | EVNRVLEIAR | .NDKVIGAGL  |
| pamu      | TEEFYNGLFA | LDANEQMNDA  | YWQQVITLRN  | EVNRVLEQAR | .NDKIIGAAL  |
| psae      | LATWYDGLNE | LPADVTLNRQ  | YWEQVMAVKA  | AVNKELENQR | .AAKAVGGNL  |
| psfl_1    | LNTWYEGLTE | LPADFELGRE  | YWEGVMAVKV  | AVNKELEVQR | .AAKAVGGNL  |
| xyfa      | FTTWYDGLAP | LPPNAPLTAA  | DFDKLLTLRD  | HVTKVLEPMR | .ANGVIGAAL  |
| neme      | FHTWHEFPTI | NEKTEAELVK  | KWTAIREARE  | AVTAAIEPLR | .ADKTVGSSL  |
| buAPS     | MEEWFDKLFY | LDQDDLFFNYQ | FWNEIITIKH  | EINKFLEEAI | .QNKTINNSL  |
| agtu      | LAQFPEIPAE | WKN..DALEA  | KWEKIRKVRT  | VVTGALEVER | .REKRIGSSL  |
| sime      | LEQFPTVPAE | WRN..DALAE  | KWRKIREVRK  | VVTGALEIER | .KEKRIGSSL  |
| melo      | LDQFPEIPAD | WKN..EALAE  | KWRKVRQVRR  | VVTGALEIAR | .AQKVIGSSL  |
| cacr      | YRVMPERVDA | WRN..DAEAA  | RWAKVEKVTS  | VVTGALEVER | .REKRIGSAL  |
| hepy26695 | DLKDISVSEK | LHLKEFKKPE  | NFEAVLALRS  | AFNEELDRLK | .KEGVIKNSL  |
| hepyj99   | DLKGISVLEK | LHLKEFKKPE  | NFEAVLALRS  | AFNEELDRLK | .KEGVVKNLSL |
| caje      | DLS...LTQ  | DFDYDFGIDD  | TF..LMSARE  | KFFEQIDILK | .KDKIIKSTL  |
| thma      | AEYWPEYREE | FID..RKLME  | DFEKLLSIRE  | DVLKALEEKR | .QQDVIGHSL  |
| fepe      | LEYWPEVRKE | FID..EALLE  | EFDHLLLRD   | DVLKALENAR | .ASDIIGHSL  |
| aqae      | LYEMPKPDEN | LKD..EEVLK  | DYEILLKVRD  | EVMRALEVAR | .KEKGIKHPY  |

1351

1400

|       |             |            |         |            |            |
|-------|-------------|------------|---------|------------|------------|
| mask  | ~~~~~       | ~~~~~      | ~~~~~   | ~~~~~      | ~~~~~      |
| stau2 | LSKMVIKPN.  | .SQLNLSFL. | .P..... | NYYSIIKDEL | NIKNIELTDN |
| bace2 | LAELVLLLEH. | .NE.NDMDW. | .E..... | SYRDIVMDEL | NVKAFHVELD |
| baan2 | LAELVLLLEH. | .NE.NDMDW. | .E..... | SYRDIVMDEL | NVKAFHVELD |
| ocih  | LAELVVVVPN. | .DEQLQSGL. | .Q..... | AYTSIIIEEI | NVKQVSFKKD |
| clpe  | LSKMLLS...  | ....TSELP. | .E..... | YGDIIKDEL  | NIKEVELGAD |
| clac  | LYEMRVS...  | ....TKALP. | .D..... | YGDIIIRDEL | NVKKVEFGAD |
| cldi  | LQKVLVDGK.  | ....FEDTI. | .S..... | DVVDLIKEEL | NVKEVIFAKD |
| pogi  | LATLMIPAI.  | .DDEQRRCI. | .E..... | SVQPLILSEV | NVKELRFVDD |
| bafr  | LQCIMIPVV.  | .DEVQKAHI. | .E..... | AVKALIMSEV | NVKEIKFVDG |
| feac  | VGNIMLYS..  | ....DMELN. | .P..... | AILDIISPEN | NSMDIKFIPF |
| thvo  | VKEILLSG..  | ....NIDP.. | .....   | EIIPVVSQEV | NAKEIRIVSS |
| thnw  | LREILIAG..  | ....DMEE.. | .....   | SIIDVVKSEL | NAKDIKLIER |
| cyhu  | LSRILIPIL.  | .QPHLKAQI. | .Q..... | AVEDLIKNEV | NIKAVEYIED |
| chte  | LRRILLAAA.  | .EPGSRAAY. | .E..... | LVSDIIKEEV | NVQKIEYVED |
| dera  | LAGVQVRAA.  | .SPEALDAL. | .K..... | RSQTQIMEEL | NVKAVT.FLE |
| stco  | LSRALIAVA.  | .GFDTLSPE. | .L..... | HS..QITEEL | NVASLASLSE |

|       |            |            |         |            |            |
|-------|------------|------------|---------|------------|------------|
| thth  | .....      | .....      | .....   | .....      | .....      |
| deet  | LAEVRVLA.  | .SAGERTGL. | .M..... | RLAEQVLEEL | NVKALA.... |
| anga  | LTEIVVHQ.  | .SEQYLADVR | .....   | SLEAFILDEL | NVRRITLSSE |
| drme  | VSEIIAIHK. | .DSQILEAIK | .....   | TLQDFILSEL | NVRKLTSSD  |
| hosa  | LKEIVVIHQ. | .DPEALKDIK | .....   | SLEKYIEEL  | NVRKVTLSTD |
| cael  | LKEMIVINR. | .DSQFLEDVK | .....   | SLESYILLEL | NVRKLTVSQD |
| asfu  | LKTLVVIHQ. | .DQQYLDDVK | .....   | SLEGYILEEL | NILELVLSSD |
| scpo  | LKTLIVILT. | .NEEYLEDAK | .....   | LLERYIAEEL | NVREVVFTSN |
| sace  | LKTLVILHS. | .DESYLKDVE | .....   | ALKNYIEEL  | NVRDVVITSD |
| ledo  | VRQVVIVHP. | .DQQYIDDVR | .....   | KVAGYIKDEV | NAFEIVMS.S |
| lema  | VRQVVIVHP. | .DQQYIDDVR | .....   | KVAGYIKDEV | NAFEIVMS.S |
| arth  | LKEMIVVHP. | .DADFLNDIT | .G..... | VLREYVLEEL | NVRSVPCND  |
| teth  | IMSLTVINQ. | .DQEFHDSLK | .....   | DYIQYIEDEI | NTPSILHEIN |
| encu  | LKSATLMS.. | .SSSLYEGIK | .....   | DYIDAIKTEC | NVLELLYKEE |
| nolo  | .....      | .....      | .....   | .....      | .....      |
| plfa  | LKSLTILHK. | .NESFFKHF  | .....   | RISNYIKEEL | NILNVEYSN. |
| plyo  | LKSIKILHR. | .ENKFFENF  | .....   | KIANYIKDEL | NILNIEYST. |
| chtr  | LQNVYIVG.. | .SKERKEALA | .....   | QVGSLIGEEL | NVKDVHFCSE |
| chmu  | LQHMYIVG.. | .AKERMAALA | .....   | QVDSLIGEEL | NVKEVHFCSE |
| chpn  | LANFYVVG.. | .SKDRLSLLK | .....   | TFEGLIAEEL | NVKNVIFYEE |
| trde  | LKAVEIVTL. | .NPPEKRVLL | .....   | EMEESIEEL  | NVKEVIFHEK |
| trpa  | LKAMQVITR. | .NPMERSALL | .....   | EMEEDVLDEL | NVKELVFHEK |
| bobu  | ISTIYIVTK. | .NQNEQNMLM | .....   | EMQEIILDEI | NAKEMKIKAN |
| myle  | LPKLVVAVY. | .NSQRLKPYI | .....   | ...DLIGDEL | NVKQIELTDA |
| mytu  | LPKLIVAVE. | .NPQLLRPFV | .....   | ...DLIGDEL | NVKQVELTDA |
| codi  | LPKVTVALP. | .ESARLADFA | .....   | ...DIIRDEV | NVKEVALTSD |
| ripr  | LACITIISK. | .HNNNLKDFE | .....   | ...DLIKDEI | NVKTVIYRDD |
| rico  | LASIAIISK. | .HNNNLKDFE | .....   | ...DLIKDEI | NVKAUIYRDD |
| psfl  | LRSIRVAGI. | .EQAVLERYA | .....   | ...QFLEEEL | NVKQVQWAAD |
| suso  | LAKVYIFIE. | .NEDTLAKVG | R.....  | .IKDVLISML | NAKDIEISKI |
| aepe  | VRRVIAAAS. | .NPGVEGSLR | R.....  | .LEGLIRLMA | NAKEIEFAPA |
| arfu  | LRELVIESG. | .SEKVRKAVE | M.....  | .LEETILSQC | NVKQVRVDS  |
| meba  | VSRIVVSPE. | .SEDAAKAVE | R.....  | .LRSVLMQDT | NSKAIVLTPV |
| meth  | VREIVVSE.  | .DDKVLEAAE | S.....  | .LKGVIAEQA | NAKSIRTSTE |
| pyho  | VRKIIIEHQ. | .DETVKKAVE | R.....  | .LNYILRDQL | NAKEVIGKV  |
| pyfu  | VRKIIIEHQ. | .DDTVKKAVE | R.....  | .LNYILRDQL | NAKEVVGNV  |
| pyab  | VRRIIIEHQ. | .DETVKKAVE | R.....  | .LNRILRDQL | NAKEVKVGRV |
| meja  | LKEITIAGG. | .EE.VKKAVE | R.....  | .FEYIIKEQG | NVKNIKFGEV |
| haNRC | VTRVVVDA.  | .EDSVVDALD | A.....  | .HGDLLADRL | NTRAEVVEP  |
| pyba  | IREAYVNG.. | ....AKYAE  | R.....  | .YTELLKYL  | NVKEVKVGR  |
| bacel | NASITLYP.. | ...TA..EM. | .....   | ...KAMLESI | NED.....   |
| baan1 | NASITLYP.. | ...TA..EM. | .....   | ...KAMLESI | NED.....   |
| bast  | TASVIVYP.. | ...KD..EA. | .....   | ...RKLLASL | DAD.....   |
| basu  | EANLKLYP.. | ...NK..EN. | .....   | ...KELLASI | KEN.....   |
| baha  | TAAITLYA.. | ...DG..DV. | .....   | ...RQLLEEL | GP.....    |
| limo  | LAKVTLYV.. | ...DG..EA. | .....   | ...KTLFDSL | EGD.....   |
| liin  | LAKVTLYV.. | ...DG..EA. | .....   | ...KTLFDSL | EGD.....   |
| stau  | EAKVTIAS.. | ...NDKFNA. | .....   | ...SEFLTSF | DA.....    |
| stpy  | EAHLTIYA.. | ...SE..EV. | .....   | ...KTLTAL  | DSD.....   |
| stmu  | EAHLTVYA.. | ...SE..EV. | .....   | ...KTLTAL  | DSN.....   |
| stpn  | EAHLTVYP.. | ...NE..VV. | .....   | ...KTLLEAV | NSN.....   |
| lala  | EATVTIYP.. | ...NE..VV. | .....   | ...RTLLTAI | DEN.....   |



|           |            |            |            |            |            |
|-----------|------------|------------|------------|------------|------------|
| enfa      | EAKVTVYP.. | ...NE..QI. | .....      | ...RQLMTAV | DAD.....   |
| syne      | EAKLIIVDPR | TAESGTDEKQ | GENFVHWFYG | WLENFNEPTF | DPNDRK.... |
| arthchl   | EAKVYLH... | TADAGMAAK. | .....LL.   | ...EMSEAKN | EAD.....   |
| prma      | ETEVNYLP.. | ..ENEFFKN. | .....SLS   | WLDKFGNKEV | DLY.....   |
| mypu      | DAHVTIN... | ....TK..S. | .....      | ...NFLMSL  | D.....     |
| myge      | QIELTVGIN. | .....KK    | .....      | ...IPKKL   | KDN.....   |
| mypn      | QVVLTLGVD. | .....S.    | .....      | .....      | .....      |
| urur      | EAFVTIAKN. | .....LI    | .....      | ...LDDYL   | INNPK..... |
| saty      | EAKVTLKYA. | ....DDANG  | TI.....    | ...KKLKL   | GEE.....   |
| esco      | EAAVTLYAE. | ....PELS.  | .....      | ...AKLTAL  | GDE.....   |
| yepe      | EAAVTLYAE. | ....PELA.  | .....      | ...ARLNSL  | QDE.....   |
| vich      | QAELVLFAD. | ....DSL.   | .....      | ...SKLAKL  | GDE.....   |
| hain      | EAEVTVYAN. | ....DEYR.  | .....      | ...ALLAQL  | GNE.....   |
| acac      | EAEVTVYTN. | ....DEYR.  | .....      | ...ALLEKL  | GDE.....   |
| pamu      | EAELTIYAN. | ....DTYA.  | .....      | ...PLLAKL  | QNE.....   |
| psae      | QAEVTLYAE. | ....DALQ.  | .....      | ...AQLAKL  | GNE.....   |
| psfl_1    | QAEVTLFAE. | ....DGLT.  | .....      | ...ADLAKL  | SNE.....   |
| xyfa      | EAEITIAAD. | ....ADTA.  | .....      | ...ARWQPL  | TEE.....   |
| neme      | QAEAEITAP. | ....EEMA.  | .....      | ...GYLNAL  | GEE.....   |
| buAPS     | ETSIILYVS. | ....HEL.   | .....      | ...NKLKIL  | EQE.....   |
| agtu      | EAAPVVHIA. | ....DSDL.  | .....      | ...LAALS   | GQD.....   |
| sime      | EAAPAVHVA. | ....DPDL.  | .....      | ...LQALN   | GQD.....   |
| melo      | EAVPVVTIN. | ....DAAL.  | .....      | ...EAAIA   | DVD.....   |
| cacr      | EAAPVVHFA. | ....DEDL.  | .....      | ...LAAFE   | GLD.....   |
| hepy26695 | ECAIEVKEK. | ....ALDE.  | .....      | .....      | .NL.....   |
| hepyj99   | ECAIEVKEK. | ....ALCE.  | .....      | .....      | .NL.....   |
| caje      | ELNLNISFN. | ....KFPN.  | .....      | .....      | .EE.....   |
| thma      | DAEVVLVPK. | ....NDTIK  | .....      | ...ALLEKY  | RDI.....   |
| fepe      | DAHVIIEAK. | ....NEELK  | .....      | ...NLLRKY  | ESL.....   |
| aqae      | EAKVYIRG.. | ....DESVE  | .....      | ...SLLKKY  | EDY.....   |

1401

1450

|       |            |            |            |            |            |
|-------|------------|------------|------------|------------|------------|
| mask  | ~~~~~      | ~~~~~      | ~~~~~      | ~~~~~      | ~~~~~      |
| stau2 | IND.Y.ITYE | LKLNFSVGP  | KLGNKTKNIQ | TLIDSLSEYD | KK..SLIESN |
| bace2 | ETK.Y.TSYQ | LKLNFKTAGP | KFGKNVNAV  | DWLKQLSQDE | VQ..NFVTTE |
| baan2 | ETK.Y.TSYQ | LKLNFKKAGP | KFGKNVNAV  | GWLKQLSQDE | VQ..NFVSTE |
| ocih  | TAD.F.LDTE | MKLNFPVAGP | KLKQVQAK   | GKVENFTEQE | KE..AFLVNG |
| clpe  | LSK.Y.VNFE | IKPNLPVLGR | AYGKLIPAIR | KEIASRNQME | LA..QKIQNG |
| clac  | LSK.Y.VNFE | IKPNLPVLGK | SYGKLIPKIR | KEISSMDQMK | LA..ERVRS  |
| cldi  | LDE.Y.MNFS | LKPNFKEAGP | LLGSKMNLV  | GALSKLNAHE | TA..NKLEKG |
| pogi  | SMG.I.LVKR | IKPDFKRLGP | RYGKVMKALA | EAVTAMTQEE | I...RSLEKA |
| baf   | AAG.V.LVKK | VKCDFKLLGP | KFGKQMKAVA | AAVAEMSQEA | I...AELEKN |
| feac  | GER.P.VKTT | VKPVFSKVAP | VLRGETNKFA | EYLNSEN... | IY..SELKKN |
| thvo  | EQR.P.LKYT | VDLKMETAAP | ILRSSVNSVR | EALKSIDGKA | AF..DAVQNG |
| thnw  | DQE.P.IRLS | ADLRMDRAAP | VLRSRVNAV  | HKIRSMGLE  | VQ..RQISEK |
| cyhu  | TSG.V.VIKT | IKPNFKKLGK | EYGAKLKEIG | NAIAELRAED | I...TAIERN |
| chte  | EDGSV.ISKK | AKPNFKTLGP | RFGKDMKLLA | EEIRIMSHKQ | I...SRLEKE |
| dera  | GDTD.VQYS  | LRPNLPVVGK | QYGKQLPVLK | KALTEADARA | VA..TAVQAG |
| stco  | VGGSL.VDTT | AKANFRALGK | RFGKRVQDVA | KAVAAADAAA | LS..LALREG |
| thth  | .....      | .....      | .....      | .....      | .....      |
| deet  | .....VE..  | .....      | .....      | .....      | .....      |
| anga  | RQRYG.VTMR | AEADHKTLGV | RLKNDFKQVL | GAIK.QLSDA | DI..TRQLAQ |

|         |            |            |            |             |            |
|---------|------------|------------|------------|-------------|------------|
| drme    | KEKYG.VTLR | AEPDHKALGQ | RLKGNFKAVM | AAIK.ALRDD  | EI..QKQVSQ |
| hosa    | KNKYG.IRLR | AEPDHMVLGK | RLKGAFKAVM | TSIK.QLSSE  | EL..EQFQKT |
| cael    | KQKYG.ITLK | AEPNFKILGA | RLKGEQKKVA | DYLKNQITES  | EL..EKFLLE |
| asfu    | EAKYN.VQYS | VSADWPTLGG | KLKKDAQVKV | KALP.SLTS   | DV..KKFVAE |
| scpo    | EEKYG.VVYS | VQADWPVLGK | KLRKDMARVK | KALP.NVTSE  | EV..KEFQKN |
| sace    | EAKYG.VEYK | AVADWPVLGK | KLKKDAKKVK | DALP.SVTSE  | QV..REYLES |
| ledo    | GENY..VETK | LDANFEVLGK | KYRKGMPAIR | KGIQ.AMTQK  | EV..TKFLHD |
| lema    | GENY..VETK | LDANFEVLGK | KYRKGMPAIR | KGIQ.AMTQK  | EV..TKFLHD |
| arth    | TLKY..ASLK | AEPDFSVLGG | RLGKSMGLVA | KEVK.EMSQK  | DI..LAFEEA |
| teth    | TANY..VDLK | AIPNHKLLGQ | KLKKEYNKDL | KAAAGNLSAK  | DI..ETLKT  |
| encu    | DRSM..FDIT | VKPNFLSL.K | KDKATMKKKM | KVIQ.GLTGD  | QA..YSLLS  |
| nolo    | .....      | .....      | .....      | .....       | .....      |
| plfa    | DISC..LNFS | AIPNFKKLG  | KLGYNIKNIQ | NKIK.NMNAE  | DI..KLFQQN |
| plyo    | DVSC..LTFS | VIPNYKKG   | KLGANLKNIQ | NKIK.NMNME  | DI..KNYEQN |
| chtr    | TPEY..VTTL | IKPNFRTLGG | KVGNRLPEIQ | RALA.GLPQE  | QI..QAFMHK |
| chmu    | TPEY..VTTL | VKPNFRSLGG | RVGNRLPEIQ | KALA.GLSQE  | QI..QAFMHN |
| chpn    | APSF..IYTT | VKPNFRMLGG | KVGSKMKEVQ | KALS.ELPNN  | AI..DKLIQE |
| trde    | EDEL..VEYS | AKANFKVLGG | ELGPLMKKAA | AIIE.QMNSS  | EI..QNIMEG |
| trpa    | EDEI..VEYR | AKANFRVLGG | ELGSKTKRAA | LSIE.RLSSA  | EI..QEILEG |
| bobu    | EEEL..ITYK | AKANFKELGG | KLKDKMKAVS | TEIS.KLKNE  | DI..IKIING |
| myle    | IDTY..GRFE | FTVNARVAGP | RLGRDVQAAI | KVVKAGEGVA  | NP..DGTLLA |
| mytu    | IDTY..GRFE | LTVNARVAGP | RLGKDVQAAI | KAVKAGDGVI  | NP..DGTLLA |
| codi    | VDSV..GRFD | VVVNAKVAGP | RLCKDVQRAI | KAVKSGNYER  | RG..D.TVVA |
| ripr    | LENY..ARKK | LSLNFAILGG | RLPHKMKAII | DAAKKGEWEA  | TT..LGLAIC |
| rico    | LENY..ASKK | LSINFPMLGG | RLPHKMKEII | AASKKGEWEA  | IT..GGLAIC |
| psfl    | ADEW..AQPV | VVLIFSLGG  | RLGPAMKAVT | TAVKAGEYVI  | DE..QGGLVA |
| suso    | EGFKSFSKYK | VEPNRSIIGK | EYKSMSPKIV | EYIENNRDII  | .AM.DILNKK |
| aepe    | SALEATRIYR | VEPDYGRLLP | KYKRDMPKVL | RLIEEKGGEI  | .GR.VLAEKG |
| arfu    | ...FEKEIE  | IKPNYKYIGP | LLKEKAGEFA | KYVASLKEIP  | .EK.LVFDG. |
| meba    | GESWDELGLE | VIPDPSKIGP | VFKKDAGKVI | PALQKVDGFA  | .LK.KAFAEA |
| meth    | FP...DMRII | AKPNPATLGP | KLRQDMPPVM | RKLEEADGAE  | .VK.AALESE |
| pyho    | ER....ELT  | VKPNFAKVG  | EFKGDS.RLV | AKWINEHGLE  | .LY.E.KGEV |
| pyfu    | ER....EIT  | VKPNFAKVG  | EFKGDA.RLV | AKWISEHGLE  | .LY.E.KGEV |
| pyab    | ER....ELT  | IKPNFAKLG  | EFKGDA.KII | AKWINENGRE  | .LY.E.KGEL |
| meja    | EGS...KYI  | IKPNYRELGG | RYRSEVPKVV | EALNKADAKE  | .LM.ERLKEG |
| haNRC   | GAAWDELAYS | ARADMSELGP | AFGDDAGAVM | NALNDARVTD  | RDI.DALAEQ |
| pyba    | .....      | .....      | .....      | .....       | .....      |
| bacel   | .....LKQL  | FIVSEYKLG  | M.MEEAP... | ADAPK.....  | .....      |
| baanl   | .....LKQL  | FIVSEYKLG  | M.MEEAP... | ADAPK.....  | .....      |
| bast    | .....LRQL  | LIVSAFSIAD | EPYDAAP... | AEAER.....  | .....      |
| basu    | .....LSQL  | FIVSELTISE | E..NEAP... | NDAQS.....  | .....      |
| baha    | .....LDKL  | FIVSAVKVAG | S.VADAP... | KEAES.....  | .....      |
| limo    | .....FAQL  | FIVSDFELVE | G.LENAP... | ESAFK.....  | .....      |
| liin    | .....FAQL  | FIVSDFELVE | G.LENAP... | ESAFK.....  | .....      |
| stau    | .....LHQL  | FIVSQVKVVD | K...LD...  | DQATA.....  | .....      |
| stpy    | .....IALL  | LIVSQLTIAD | LA..DAP... | ADAVA.....  | .....      |
| stmu    | .....IAQL  | LIVSQLTVT. | QE..QAP... | KNALV.....  | .....      |
| stpn    | .....VAQL  | LIVSELTIA. | EG..PAP... | EAALS.....  | .....      |
| lala    | .....VAQL  | LIVSNFVVAN | EPVNNAP... | ESAMK.....  | .....      |
| enfa    | .....IAQL  | LIVSDFEVSK | E...VAP... | SEAVQ.....  | .....      |
| syne    | ....ISLRNI | FLTSQVEFIK | SAEIEPS... | FITYEETV... | ....V..... |
| arthchl | ....TLQRI  | FITSQVEVLS | SMEKEMI... | SSVQHTG...  | ....E..... |

|           |            |            |            |            |       |
|-----------|------------|------------|------------|------------|-------|
| prma      | .....RDW   | LIVSDFNIVN | NLSKDCL... | S.....     | ..... |
| mypu      | .....LKKL  | LMIGKISFGS | S.....     | .....      | ..... |
| myge      | .....LALW  | LNVNSVNLTN | N.....     | .....      | ..... |
| mypn      | .....      | ..TSAIDPTS | .....      | .....      | ..... |
| urur      | .....LLAKW | FGVAKIEFAN | N.....     | .....      | ..... |
| saty      | .....VRFI  | FITSQFVISE | QAGGIDDENI | QYNAG..... | ..... |
| esco      | .....LRFV  | LLTSGATVAD | YNDAPAD..A | QQSEV..... | ..... |
| yepe      | .....LRFV  | LLTSAAKVAA | YADAGND..A | QQSEL..... | ..... |
| vich      | .....LRFV  | LLTSKAVVKP | LAEKS.E..A | AQATD..... | ..... |
| hain      | .....LRFV  | LITSKVDVKS | LSEKPAD... | LADSE..... | ..... |
| acac      | .....LRFV  | LITSKAEVKP | LTDKPAD... | VAEGE..... | ..... |
| pamu      | .....LRFV  | LLTSKAEVKP | LAD..AD... | VAEGE..... | ..... |
| psae      | .....LRFV  | LITSTATLAP | LSAAPAD... | AVDSE..... | ..... |
| psfl_1    | .....LRFV  | LITSTASLAP | FTQAPAD... | AVATE..... | ..... |
| xyfa      | .....LRFL  | FISGDVTVTP | ANT.....   | .....      | ..... |
| neme      | .....LRFA  | LLVSKAEVKV | GSE.....   | .....      | ..... |
| buAPS     | .....TKFI  | FLTSDIQIKL | YDTAPKN..A | KKSKI..... | ..... |
| agtu      | .....FAEI  | CITSAITVVG | DEG.PAD..G | FRLQE..... | ..... |
| sime      | .....FAEI  | CITSAIEVDG | GDG.PED..A | FRLPD..... | ..... |
| melo      | .....MAEM  | AITSDLVIAH | GQA.PEG..A | FTLDD..... | ..... |
| cacr      | .....AGEV  | FRTSSATLVA | GD...AG..A | FRVDE..... | ..... |
| hepy26695 | .....VEEL  | LMVSFVG... | .....I     | AKEKL..... | ..... |
| hepyj99   | .....VEEL  | LMVSFVG... | .....V     | AKEKL..... | ..... |
| caje      | .....LADW  | FMVSQISNEN | EE.....I   | LAEFE..... | ..... |
| thma      | .....LEEL  | FIVSKVSLSD | A.....     | SGELK..... | ..... |
| fepe      | .....LEEF  | FIVSKVTLSE | N.....     | ISGLN..... | ..... |
| aqae      | .....LNFF  | FTVSQVELRE | GG.....    | EVQIE..... | ..... |

1451

1500

|       |            |            |            |               |          |
|-------|------------|------------|------------|---------------|----------|
| mask  | ~~~~~      | ~~~~~      | ~~~~~      | ~~~~~         | ~~~~~    |
| stau2 | NFKSLS.... | SDAELTKDDF | IIKTLP.... | .....         | .....KDS |
| bace2 | RAVYEAAS.G | EEVVVTTEDV | LVEKVA.... | .....         | .....KSG |
| baan2 | RAVYEVAP.G | EEIVVTTEDV | LVEKVA.... | .....         | .....KSG |
| ocih  | TINVELQD.G | SEVTLEKEDI | IVEKKG.... | .....         | .....QEG |
| clpe  | GVEVITVD.G | NEIELNAENL | LVTMQG.... | .....         | .....LEG |
| clac  | EAVKIDVD.G | TEIELNSENL | LVTMQG.... | .....         | .....LEG |
| cldi  | ETLTVDLG.G | EAFEFNKDLV | LIGITA.... | .....         | .....KEG |
| pogi  | GTFRMEVA.G | TPVELELADV | EIVSED.... | .....         | .....IPG |
| bafr  | GKYTFDLG.G | AEAVIESADV | EIFSED.... | .....         | .....IPG |
| feac  | GKITYK.... | .GNEFTPdff | EIHEDP.... | .....         | .....SPE |
| thvo  | GKLRVL.... | .DHELTGEML | NISTIP.... | .....         | .....DPD |
| thnw  | GFVEID.... | .GVRLDPDMV | EISRVP.... | .....         | .....DPN |
| cyhu  | .VFELKLADG | TVIPITSEDV | EIRSQD.... | .....         | .....IPG |
| chte  | GSIEIDLG.G | RICTVLREDV | DIVHED.... | .....         | .....IEG |
| dera  | QGFSVQAD.G | VTFDLTPGSV | LVDACA.... | .....         | .....PEG |
| stco  | T.ASVEVD.G | ETVTLAPDEV | IITETP.... | .....         | .....REG |
| thth  | .....      | .....      | .....      | .....         | .....    |
| deet  | .....      | .....      | .....      | .....         | .....    |
| anga  | GHFDIAG... | ..HRVELEEI | RLIYQ....  | ...FSGGN..    | .....AS  |
| drme  | GYFDILD... | ..QRIELDEV | RIIYC....  | ...TSEQVG.    | .....GN  |
| hosa  | GTIVVEG... | ..HELHDEDI | RLMYT....  | ...FDQATGG T. | .....AQ  |
| cael  | GKLTVLG... | ..HELSSEEV | AVSYA....  | ...AGSDQG.    | .....HG  |

|         |            |            |            |            |            |
|---------|------------|------------|------------|------------|------------|
| asfu    | KKMLVDG... | ..IELVEGDL | VVKRG..... | ...LKEDVAS | .....EG    |
| scpo    | KKMVLGD... | ..IELVEGDL | QIIR.....  | ...SVEVKN  | .....EF    |
| sace    | GKLEVAG... | ..IELVKGDL | NAIRG..... | ...LPESAVQ | .....AG    |
| ledo    | KKGVVVG... | ..KELTIEDV | KV.....    | ...LRQVKEG | .....ITD   |
| lema    | KKGVVVG... | ..KELTIEDV | KV.....    | ...LRQVKEG | .....ITD   |
| arth    | GEVTIAN... | ..HLLKETDI | KVSHAMMFSC | EIALRIVRVF | KRPDDLKENE |
| teth    | GSIDLVG... | ..KKLLEDF  | TITQN..... | ...YKKEYSS | .....GD    |
| encu    | .PLVVDG... | ..LEILRDDV | LIVKK..... | ...IRCEG.. | .....      |
| nolo    | .....      | .....      | .....      | .....      | .....      |
| plfa    | KQIIIDN... | ..ILLEQDDI | IIQMN..... | ...HNIQND. | .....N.    |
| plyo    | KKIIIDN... | ..ILLEDDDI | IINLK..... | ...HNLNLE. | .....H.    |
| chtr    | GQMVVSLG.E | ETISLDKEDI | TVS.....   | ...WASAEG. | .....      |
| chmu    | GFMVLSLG.E | ETISLNEEDI | TVS.....   | ...WEAAPG. | .....      |
| chpn    | ETWVLTID.D | REIALDGDDV | VIC.....   | ...RHTDPG. | .....      |
| trde    | ATLSIDIE.G | KSVEITADKI | VIN.....   | ...RIEKA.  | .....S     |
| trpa    | TTLYLDVD.G | DRLELTEEKI | LVQ.....   | ...RIERE.  | .....S     |
| bobu    | TSYEIKVA.N | AKHYLSLNDI | ILE.....   | ...REEKE.  | .....N     |
| myle    | GPVVLQPD.E | YSSRLVAANP | EF.....    | .....      | .....      |
| mytu    | GPAVLTPD.E | YNSRLVAADP | ES.....    | .....      | .....      |
| codi    | DGIELVAG.E | FTERLVAADP | DS.....    | .....      | .....      |
| ripr    | G.EILNSD.E | YTLILEPYSH | IKG.....   | .....      | .....      |
| rico    | G.ETLNSD.E | YKLVLEPYSH | IKG.....   | .....      | .....      |
| psfl    | AGQTIQPH.E | FERRLTVRDT | LNN.....   | .....      | .....      |
| suso    | Q.HVAKIDN. | FDIILNASYV | IISEET.... | .....      | ...VE      |
| aepe    | V.YEGEYEG. | LPVKLTLEDV | SLKAEY.... | .....      | ...PE      |
| arfu    | ...VELDPK  | QAIVVDY... | ...RL....  | .....      | ...PE      |
| meba    | GEFELSLADR | TTVTVTPGMA | NFKETL.... | .....      | ...PE      |
| meth    | GSFRVDLDGR | .IIVLEPDDI | IFETEL.... | .....      | ...PE      |
| pyho    | D...VEIEGK | .KFHLTREHI | IVEEKL.... | .....      | ...PD      |
| pyfu    | D...VEIEGK | .KFHLTREHI | IVEENI.... | .....      | ...PD      |
| pyab    | T...VEIDGK | .TFHLTREHI | IVEEKL.... | .....      | ...PD      |
| meja    | A...VILDG. | ..YEIKPEYV | EIRLEI.... | .....      | ...PE      |
| haNRC   | VAADLGRDD. | ..IELTTEMV | EFVEET.... | .....      | ...PE      |
| pyba    | .....      | .....      | .....      | .....      | ...PD      |
| bacel   | .....      | .....      | .....      | .....      | .....      |
| baan1   | .....      | .....      | .....      | .....      | .....      |
| bast    | .....      | .....      | .....      | .....      | .....      |
| basu    | .....      | .....      | .....      | .....      | .....      |
| baha    | .....      | .....      | .....      | .....      | .....      |
| limo    | .....      | .....      | .....      | .....      | .....      |
| liin    | .....      | .....      | .....      | .....      | .....      |
| stau    | .....      | .....      | .....      | .....      | .....      |
| stpy    | .....      | .....      | .....      | .....      | .....      |
| stmu    | .....      | .....      | .....      | .....      | .....      |
| stpn    | .....      | .....      | .....      | .....      | .....      |
| lala    | .....      | .....      | .....      | .....      | .....      |
| enfa    | .....      | .....      | .....      | .....      | .....      |
| syne    | .....I...  | .....      | .....      | ...N.      | .....      |
| arthchl | .....Y...  | .....      | .....      | .....      | .....      |
| prma    | .....      | .....      | .....      | .....      | .....      |
| mypu    | .....      | .....      | .....      | .....      | .....      |
| myge    | .....      | .....      | .....      | .....      | .....      |

|           |       |       |       |       |       |
|-----------|-------|-------|-------|-------|-------|
| mypn      | ..... | ..... | ..... | ..... | ..... |
| urur      | ..... | ..... | ..... | ..... | ..... |
| saty      | ..... | ..... | ..... | ..... | ..... |
| esco      | ..... | ..... | ..... | ..... | ..... |
| yepe      | ..... | ..... | ..... | ..... | ..... |
| vich      | ..... | ..... | ..... | ..... | ..... |
| hain      | ..... | ..... | ..... | ..... | ..... |
| acac      | ..... | ..... | ..... | ..... | ..... |
| pamu      | ..... | ..... | ..... | ..... | ..... |
| psae      | ..... | ..... | ..... | ..... | ..... |
| psfl_1    | ..... | ..... | ..... | ..... | ..... |
| xyfa      | ..... | ..... | ..... | ..... | ..... |
| neme      | ..... | ..... | ..... | ..... | ..... |
| buAPS     | ..... | ..... | ..... | ..... | ..... |
| agtu      | ..... | ..... | ..... | ..... | ..... |
| sime      | ..... | ..... | ..... | ..... | ..... |
| melo      | ..... | ..... | ..... | ..... | ..... |
| cacr      | ..... | ..... | ..... | ..... | ..... |
| hepy26695 | ..... | ..... | ..... | ..... | ..... |
| hepyj99   | ..... | ..... | ..... | ..... | ..... |
| caje      | ..... | ..... | ..... | ..... | ..... |
| thma      | ..... | ..... | ..... | ..... | ..... |
| fepe      | ..... | ..... | ..... | ..... | ..... |
| aqae      | ..... | ..... | ..... | ..... | ..... |

1501

1550

|       |            |             |            |             |             |
|-------|------------|-------------|------------|-------------|-------------|
| mask  | ~~~~~      | ~~~~~       | ~~~~~      | ~~~~~       | ~~~~~       |
| stau2 | YQLSEDND.. | .....CVILL  | DKNLSPELIR | EGHARELIRL  | IQQLRKKKNL  |
| bace2 | FSNTTNGQ.. | .....YTVML  | DTNVTEELLQ | EGVAREFIRA  | VQEYRKQLNL  |
| baan2 | FSNTTNGQ.. | .....YTVML  | DTNVTEELLQ | EGVAREFIRA  | VQEYRKQLNL  |
| ocih  | YQLFEGNR.. | .....FVLLL  | DTNLTEKLKE | EGFVREFIRA  | VQTYRKELDL  |
| clpe  | FAFAGEGS.. | .....VGVVL  | DTTITDELRE | EGHVREIISK  | IQNMRESGSGF |
| clac  | FAFAGIGE.. | .....IGIVL  | ETTITDELRE | EGYLREVLRSK | VQNMRESGSGF |
| cldi  | FNVSVENN.. | .....LFVIL  | DTKLTEELIN | EGYAREFISK  | VQQLRKSNNF  |
| pogi  | WLVANEGN.. | .....LTVAL  | DITVTDELRS | EGLARELVNR  | VQNIRKQSGF  |
| bafr  | WLVANEGK.. | .....LTVAL  | EVTVTDELRR | EGIARELVNR  | IQNIRKSSGF  |
| feac  | YAFASDEKT. | .....GISVFI | NKNIDSNNLL | AGYAREIIRR  | IQIMRKDLNL  |
| thvo  | YGYSRDEKN. | .....GIDVFI | NKRIDRNEYL | EGLAREIVRR  | IQLMRKEMNL  |
| thnw  | YAYSQTEKY. | .....GIDVFI | NKNIDRDGYL | EGLARELVRR  | IQVMRKEMNL  |
| cyhu  | WSVASEGG.. | .....ITVAL  | DITLSDDLK  | EGIARDVVNR  | VQNLRKDMGL  |
| chte  | WLVAADDAH. | .....RIMVAL | DTEITEELEM | LGLARELVSR  | IQTLRKESGL  |
| dera  | VAAAEDAG.. | .....YLVAF  | DTALTPELVR | EGLARDLVRA  | IQEARKAAGF  |
| stco  | WSVASDSG.. | .....ATVAL  | DLELTEELRR | AGLARDAIRL  | IQEARKNSGL  |
| thth  | .....      | .....       | .....      | .....       | .....       |
| deet  | .....      | .....       | .....      | .....       | .....       |
| anga  | FEAHSND..  | .....VLVLL  | DMPNEELMR  | EGTAREIINR  | IQKLKKKAKL  |
| drme  | FEAHSND..  | .....VLVLL  | DMPNEELLE  | EGLAREVINR  | VQKLKKKAQL  |
| hosa  | FEAHSDAQ.. | .....ALVLL  | DVTPDQSMVD | EGMAREVINR  | IQKLRRKCNL  |
| cael  | YKTHSDAK.. | .....TIVMI  | DTTEDESLIE | EGLCREVTNR  | VQRLRKQAKL  |
| asfu  | MEPNADAD.. | .....VLTIL  | DANLYPELAQ | QGLGREIINR  | LQRLRRKAGL  |
| scpo  | LKSNTDGI.. | .....CIVLL  | DIEIDAQLQA | EGLAREVINR  | VQRLRRKSNL  |
| sace  | QETRTDQD.. | .....VLIIM  | DTNIYSELKS | EGLARELVNR  | IQKLRRKCCGL |

|         |            |             |             |            |            |
|---------|------------|-------------|-------------|------------|------------|
| ledo    | FQSNTDND.. | .....VVVLV  | DKRQDQELID  | SWRAREFVNR | VQQLRKKAKL |
| lema    | FQSNTDND.. | .....VVVLV  | DKRQDQELID  | SWRAREFVNR | VQQLRKKAKL |
| arth    | IDSAGDGD.. | .....VLVIL  | DLRADDSLVE  | AGFAREIVNR | IQKLRKKSGL |
| teth    | LELGGEGE.. | .....VILLL  | NLAQDEKLKS  | KGLVREFTSN | VQKTKKKTGL |
| encu    | .IAQEFGD.. | .....FSIII  | DNTLDEGMVK  | MKIAREFHSY | IQKLRKSAGL |
| nolo    | .....      | .....       | .....       | .....      | .....      |
| plfa    | TEAISNNY.. | .....ITILM  | DFTADQQLN   | MASAREICNH | IQKIRKNLSL |
| plyo    | IEAISENS.. | .....ITILM  | DFTADEQLNN  | MENAREICNN | IQKMRKKLAL |
| chtr    | FVARSSAS.. | .....FVAVL  | DCQLTEPLIM  | EGIARELVNK | INTMRRNRKL |
| chmu    | FVARSSAS.. | .....FVAIL  | DCQLTSPLIM  | EGIAREIVNK | INTMRRNGKL |
| chpn    | YIARSSAL.. | .....FSVIL  | DCQLREPLIV  | EGIARELVNK | INTMRRNQQL |
| trde    | LKIVNEGT.. | .....LTVGL  | NTELTEELLM  | EGYIRDLVRG | IQTLRKECGL |
| trpa    | LKAINEGT.. | .....LTVAL  | DTTLTEDLLL  | EGAIRDLVRG | VQNLRKERGF |
| bobu    | LKVINEES.. | .....ITIGI  | DSLITKELYL  | EGLTREFVRR | IQNLRKEKNF |
| myle    | TAELPDGS.. | .....GLVVL  | DDTVTPELEA  | EGWAKDRIRE | LQELRKLIGL |
| mytu    | TAALPDGA.. | .....GLVVL  | DGTVTAELEA  | EGWAKDRIRE | LQELRKSTGL |
| codi    | TTQIDGVD.. | .....GLVVL  | DMTLTEELEA  | EGWAADVIRG | LQDARKASGF |
| ripr    | TANFDNNS.. | .....SLLIL  | NLELTSELIE  | EGYARDIVRF | IQYARKEADF |
| rico    | AASFENNS.. | .....SLLIL  | DLELTPELIE  | EGYARDIVRF | IQQARKDADF |
| psfl    | VGIVEN.... | .....MVVWL  | DLIDIDASLKR | EGAVRELNRR | LQDLRKKAKL |
| suso    | GFISSKFS.. | .....KGIVVI | SKEISESEEE  | EGLIRDIIRR | IQFMRKQLKL |
| aepe    | WLKVRDTP.. | .....LGLVAV | DTRLTKEEVL  | EGLARDIVRR | IQAMRKEAGY |
| arfu    | GYEYAEFS.. | .....GGVVYI | YKELDDELVR  | EFAREVIRR  | IQEMRKELDL |
| meba    | GTASAESD.. | .....AGLVYV | DANLTPELEA  | EGYAREVIRR | LQDMRKELDL |
| meth    | NIVNAQFE.. | .....GGSVFV | DTELTPEIMS  | EAMARELVRR | IQDMRKDLDL |
| pyho    | FLVAEDFE.. | .....GGRVYV | DKTLTRELLA  | EGLAREFVRR | IQEMRKRLDL |
| pyfu    | FLVAEDFE.. | .....GGRVYV | DKTLTRELLA  | EGLAREFVRR | IQEMRKRLDL |
| pyab    | FFVSEEFE.. | .....GGRVYV | DKTLTRELLA  | EGLAREFVRR | IQEMRKRLDL |
| meja    | HIAGVEFS.. | .....KGTVFI | NTEITDDLK   | EGLMREVIRR | IQAMRKDMDL |
| haNRC   | HVAGAAFETE | TA..AGTVYV  | DTELNEVES   | EGYAREVRR  | VQEMRKEMDL |
| pyba    | YLCVKEGE.. | .....LEVCV  | PDKIEPELYY  | EALARELIRR | IQVMRKETGL |
| bacel   | .YEH.....  | .....TAVVV  | AQATGE...T  | CERCWVSET  | IGK..DAEHE |
| baan1   | .YEH.....  | .....TAVVV  | AQATGE...T  | CERCWVSET  | IGK..DAEHE |
| bast    | .LDH.....  | .....VAVLV  | RPAEGE...T  | CERCWVTPA  | VGQ..DPSHP |
| basu    | .FAT.....  | .....GKIAV  | EKAEGE...M  | CERSRVISKD | VGA..NPKYP |
| baha    | .YDD.....  | .....LAIIV  | EKAEGE...T  | CERCWVVSPT | VGT..NNEHP |
| limo    | .SNQ.....  | .....VAVQI  | TVAEGE...T  | CERCWVVKD  | VG..NPKHP  |
| liin    | .SNQ.....  | .....VAVQI  | TVAEGE...T  | CERCWVVKD  | VG..NPKHP  |
| stau    | .YEH.....  | .....GDIVI  | EHADGE...K  | CERCWVSED  | LGA..VDEL  |
| stpy    | .FEG.....  | .....VAFIV  | EHAIGE...V  | CERSRVIDPT | TRM..RSYNA |
| stmu    | .FED.....  | .....VAFSV  | EHARGH...V  | CDRCRVIDET | VKE..RPYHV |
| stpn    | .FED.....  | .....VAFTV  | ERATGE...V  | CDRCRVIDPT | TAE..RSYQA |
| lala    | .FDD.....  | .....LAVLV  | EHAAGE...V  | CDRCRVIDET | VGHANEHLK  |
| enfa    | .FED.....  | .....MAILV  | EKAEGE...T  | CDRCRSVRQD | VGS..DEKLP |
| syne    | .LERH..DNN | IRTKPIKIV   | TKADGH...K  | CERCWVYSTQ | VGS..FSDDP |
| arthchl | .VE...GEN  | K...VWIGV   | SRAEGS...K  | CERCWVYSTQ | VGS..FSDDP |
| prma    | .ID...NNE  | LG...KIQI   | LKAKGL...K  | CDRCWHYQNI | TVK..GIENT |
| mypu    | .....      | .....LRV    | ETFDSH...K  | CPRCWNHIEK | TEV..VED.. |
| myge    | ..EN.....  | .....EIKV   | KKTKKT...M  | CERCWNFQTI | IKQ..KLDHN |
| mypn    | .....      | .....       | .....       | CK...TFSSL | AKR..KPGK. |
| urur    | ..TN.....  | .....VANA   | NFKKCL...R  | CWNHFPDEEM | YND..ELSMN |
| saty    | .NT.....   | .....TVQAVV | TRAEGD...K  | CPRCWHYTTD | VGK..VAEHA |

|           |           |             |            |            |            |
|-----------|-----------|-------------|------------|------------|------------|
| esco      | .LK.....  | ....GLKVAL  | SKAEGE...K | CPRCWHYTQD | VGK..VAEHA |
| yepe      | .IA.....  | ....GLKITF  | NKADGE...K | CPRCWHYTQD | VGL..VAEHA |
| vich      | .ID.....  | ....GLFVQV  | NKTEAE...K | CDRCWHHTPD | VGT..IAGHT |
| hain      | .LE.....  | ....GIAVSV  | TRSNAE...K | CPRCWHYSDE | IGV..SPEHP |
| acac      | .LE.....  | ....GIAVSI  | ARSNGG...K | CPRCWHYSDE | IGV..NPQHP |
| pamu      | .VK.....  | ....GFAVKV  | VRSANH...K | CPRCWHYSDE | K.....DAE  |
| psae      | .VA.....  | ....GLKLVK  | VKSTHA...K | CGRCWHHRED | VGQ..HAAHP |
| psfl_1    | .VP.....  | ....GLKLVK  | VKSAFP...K | CARCWHCRED | VG..NPEHP  |
| xyfa      | .D.....   | ....GFFVSA  | QPTTKA...K | CARCWHYRAD | IGA..HPTHP |
| neme      | .....     | ....LAVAA   | KASDGE...K | CERCWHYTRD | VGA..VAGHE |
| buAPS     | .VP.....  | ....YLVKSL  | EKIKGK...K | CPRCWHYFNF | TKK..NIKNS |
| agtu      | .VA.....  | ....KVVVEQ  | KLAEGV...K | CARSWRITTD | VGS..DPQYP |
| sime      | .VA.....  | ....KVSVP   | KLAEGV...K | CARSWRITTD | VGS..DPLYP |
| melo      | .VR.....  | ....GVAVVV  | EKAEDRGLVK | CARSWRYTAD | VGQ..DPAFP |
| cacr      | .VK.....  | ....GVSVDP  | NKAEGK...K | CARSWRILPE | VGT..DPRYP |
| hepy26695 | .SE.....  | ....TPAFTL  | FKAPFY...K | CPRCWRFKSE | L.....EN   |
| hepyj99   | .SE.....  | ....TPAFTL  | FKAPFY...K | CPRCWRFKSE | L.....EN   |
| caje      | .VE.....  | ....NEKFKI  | TKASLC...K | CPRCWKLQSK | N.....EE   |
| thma      | .GE.....  | ....LVEVTV  | KHAEGE...K | CQRCWKYTTE | ISA..SEDFP |
| fepe      | .GQ.....  | ....FANVLV  | QRAEQG...K | CQRCWKYHPD | TGK..DLEHP |
| aqae      | .GEE..... | ....LPVKVGV | NKAEGE...K | CPRCWIYYQK | EEF..VGCVC |

1551

1600

|       |             |            |            |            |              |
|-------|-------------|------------|------------|------------|--------------|
| mask  | ~~~~~       | ~~~~~      | ~~~~~      | ~~~~~      | ~~~~~        |
| stau2 | PINQRIDIYI  | GVTG.....  | .....      | .....      | .....        |
| bace2 | PVNLRV DVIL | DTEE.....  | .....      | .....      | .....        |
| baan2 | PVNLRV DVIL | DTEE.....  | .....      | .....      | .....        |
| ocih  | PVEQRVDIYV  | NSDE.....  | .....      | .....      | .....        |
| clpe  | EVADKITLYV  | AEND.....  | .....      | .....      | .....        |
| clac  | EVADKIEIYV  | SGNE.....  | .....      | .....      | .....        |
| cldi  | EVLDNIVIEY  | CGDD.....  | .....      | .....      | .....        |
| pogi  | EVSDKVDVLL  | LSND.....  | .....      | .....      | .....        |
| bafr  | EITDKIKLTL  | SKNP.....  | .....      | .....      | .....        |
| feac  | EYSSNIKTEI  | NVTG.....  | .....      | .....      | .....        |
| thvo  | DYTDRI NVWI | DPVG.....  | .....      | .....      | .....        |
| thnw  | NYTDRI ITHL | DLSD.....  | .....      | .....      | .....        |
| cyhu  | EVQDKIRITI  | QKVD.....  | .....      | .....      | .....        |
| chte  | EITDRI ALTI | AGSE.....  | .....      | .....      | .....        |
| dera  | EVQDRI ALAL | ELDG.....  | .....      | .....      | .....        |
| stco  | DVADRI ALRW | TATDP..... | .....      | .....      | .....        |
| thth  | .....       | .....      | .....      | .....      | .....        |
| deet  | .....       | .....      | .....      | .....      | .....        |
| anga  | IPTDPVLIYY  | TVSGGDSEVR | SVAESHRSFI | VGTVKSPFVP | YGPEAAAKPV   |
| drme  | IPTDPVLIFH  | ELAADN.... | .....K.    | .....      | .....AKQEV   |
| hosa  | VPTDEITVYY  | KAKSEGTYLN | SVIESHTEFI | FTTIKAPLKP | YP.VSPSDKV   |
| cael  | VSTDTAHVHI  | VVSPADSQLA | KVVAAKLNDI | VSATGTPIKL | GSPPAAKAP    |
| asfu  | VPTDDVRMEY  | AVLSDP.... | .....      | .....      | .....DSV     |
| scpo  | QVTDDVRMTY  | KIKN.....  | .....      | .....      | .....DTI     |
| sace  | EATDDVLVEY  | ELVK.....  | .....      | .....      | .....DTI     |
| ledo  | VVTDEVDVYF  | EAEEDL TAS | .....      | .....      | .....ILHSKDQ |
| lema  | VVTDEVDVYF  | EAEEDL TAS | .....      | .....      | .....ILHSKDQ |
| arth  | EPTDFVEVYF  | QSLDEDESVS | KQ.....    | .....      | .....VLVSQEQ |

teth KVDDNIVIYY DVTKAP . . . . . KLNA  
encu RVGDDVVVDI QCP . . . . .  
nolo . . . . .  
plfa NQNSPVLMIHI YIYDQT . . . . . FKN  
plyo SQNSPVQMHI FIQNET . . . . . FKN  
chtr HVSDRIAIRL HAP . . . . . V  
chmu HVSDRIAIRL HAP . . . . . K  
chpn HVSDRIALRI KTT . . . . . E  
trde DVTDRIKLYL SASQKN . . . . . ADNK  
trpa SLVDRICLRV FSSDQ . . . . . DIV  
bobu DVSDRINLYI ENNET . . . . .  
myle DVSDRIRVLM SVP . . . . . A  
mytu DVSDRIRVVM SVP . . . . . A  
codi EVSDRIEVKL VVP . . . . . E  
ripr SITDRILIEI ISE . . . . . F  
rico SITDRILIEI ISE . . . . . F  
psfl GYTEKVDIAV LGG . . . . . A  
suso NVLDYIEISM KVPEE . . . . .  
aepe SVEDYVEVWI QGGED . . . . .  
arfu DVEEFIEITTV EMDAE . . . . .  
meba VVDENIRVSV RIEDER . . . . .  
meth DVEARIEVSV KCSPEF . . . . .  
pyho DVNDRIVVTI ETDD . . . . .  
pyfu DVNDRIVVTI ETTEE . . . . .  
pyab DVNDRIIVTI ETTDE . . . . .  
meja DIEEKIKIKV EGID . . . . .  
hanRC AMDAEIRLDV LVFDER . . . . .  
pyba EISDEIHVVV ETNSDD . . . . .  
bacel TLCERCATVV KENYVK . . . . .  
baan1 TLCERCATVV KENYVK . . . . .  
bast TFCPRCAHIV NEHY . . . . .  
basu TLSLRNAEIV EKYYQK . . . . .  
baha TLCADCAETV ATYYVTK . . . . .  
limo TLCGRCADIV VKHY . . . . .  
liin TLCGRCADIV VKHY . . . . .  
stau HLCPRCQQVV KSLV . . . . .  
stpy FVCDHSAKII EENFPEAVAE GFEESEK . . . . .  
stmu TICNHCAAIV ENHFPEAVRQ GFESK . . . . .  
stpn VICDHCASIV EENFAEAVAE GFEEK . . . . .  
lala MLCEHCAHIV ETEFPEILEE GFED . . . . .  
enfa TLCGRCAHIV EENYPEAVAE GFE . . . . .  
syne TICERCNEAL QGNF . . . . .  
arthchl TLCGRCFSVI VANPPEPAVA AVNSLA . . . . .  
prma KLCERCANII NL . . . . .  
mypu .LCQRCYQTI NS . . . . .  
myge .LCSRCFKVC . . . . .  
mypn .YNEWQORN . . . . .  
urur .CYKVINKIK . . . . .  
saty DICGRCVSNI AGNGEQRKFA . . . . .  
esco EICGRCVSNV AGDGEKRKFA . . . . .  
yepe ELCGRCVTNV AGDGEERKFA . . . . .  
vich TICGRCVSNV EGEGEVRKFA . . . . .



|           |            |            |       |       |       |
|-----------|------------|------------|-------|-------|-------|
| hain      | TLCARCVENV | VGNGEVRYFA | ..... | ..... | ..... |
| acac      | SLCPRCVENV | AGNGEIRHFA | ..... | ..... | ..... |
| pamu      | SLCSRCDENV | NGQGEVRQFA | ..... | ..... | ..... |
| psae      | DLCGRCIENI | EGSGEVRHYA | ..... | ..... | ..... |
| psfl_1    | EICGRCDVNI | SGEGEVRHYA | ..... | ..... | ..... |
| xyfa      | ELCGRCVTNV | DGPGEQRHWF | ..... | ..... | ..... |
| neme      | TVCKRCAENV | GGEGETRHYA | ..... | ..... | ..... |
| buAPS     | DICNRCILNT | IGNGEKRIFI | ..... | ..... | ..... |
| agtu      | DVSARDAAL  | RELAALK... | ..... | ..... | ..... |
| sime      | DVSARDAAL  | RELGFKP... | ..... | ..... | ..... |
| melo      | DVSARDAAVL | HELKALGRL. | ..... | ..... | ..... |
| cacr      | ELSLRDADAV | AYWDAGRG.. | ..... | ..... | ..... |
| hepy26695 | TPCKRCEQVL | KER.....   | ..... | ..... | ..... |
| hepyj99   | TPCKRCEEVL | KER.....   | ..... | ..... | ..... |
| caje      | TPCLRCEEVL | KGVQC..... | ..... | ..... | ..... |
| thma      | GVCPRCLAVL | KGERK..... | ..... | ..... | ..... |
| fepe      | ETCPRCSAVL | RGERK..... | ..... | ..... | ..... |
| aqae      | KRCAKALSEM | GIELNAVC.. | ..... | ..... | ..... |

1601

1650

|       |            |             |            |            |            |
|-------|------------|-------------|------------|------------|------------|
| mask  | ~~~~~      | ~~~~~       | ~~~~~      | ~~~~~      | ~~~~~      |
| stau2 | ELLESIKTNK | NMFKE.....  | .....NFVI  | KNIHLNV... | .....      |
| bace2 | ELQOTLTNHK | QLLEE.....  | .....NLLV  | KQFTFGH... | .....      |
| baan2 | ELQOTLTNHK | ELLEE.....  | .....NLLV  | KQFTFGH... | .....      |
| ocih  | NAERILSEFD | ALIHD.....  | .....GLII  | NSVQFAE... | .....      |
| clpe  | MLLDVIKKFE | DVIKK.....  | .....ETLT  | EEIVYNG... | .....      |
| clac  | KLENVIRKFE | DTIKK.....  | .....ETLA  | TDIIYSE... | .....      |
| cldi  | EIAKAVDHFN | EYIKS.....  | .....ETLA  | LEINRVD... | .....      |
| pogi  | IMDKVVAEHH | DYIAQ.....  | .....QIQA  | ESLEIS...  | .....      |
| bafr  | QTDDAVNEYN | SYICN.....  | .....QVLG  | TSLTLA...  | .....      |
| feac  | DIRKSIEKFM | DLIKN.....  | .....ETLS  | KSIEFS...  | .....      |
| thvo  | DFSDAIDKFE | SYIKA.....  | .....ETQC  | DSLNVGH... | .....      |
| thnw  | DFLEALNKHA | EYIKN.....  | .....ETQS  | DSIITDK... | .....      |
| cyhu  | EL.....    | .....       | .....      | .....      | .....      |
| chte  | KLLAAARKSE | SYIMD.....  | .....ETLA  | TSIVLLP... | .....      |
| dera  | EALEAAQAWQ | DFIAG.....  | .....EVLA  | EQVAYGS... | .....      |
| stco  | ATIAALTDHS | GLISD.....  | .....EVLA  | TDFAQGE... | .....      |
| thth  | .....      | .....       | .....      | .....      | .....      |
| deet  | .....      | .....       | .....      | .....      | .....      |
| anga  | LIEESQELKG | ITLTITICSP  | HDREVPAAPW | VNLQLDEGLA | PR.....YQ  |
| drme  | LEAQAQLAK. | .VLSN.....  | .....YASI  | IKTAIKSEFA | P.....YS   |
| hosa  | LIQEKTLKKG | SELEITLTRG  | SSLPGPACAY | VNLNICANGS | EQGGVLLLEN |
| cael  | TATSKSAIKD | SEVELWLF AE | .....GDSF  | DGITVVDGSK | K.....VR   |
| asfu  | GIDEAFKTQA | KAIEK.....  | .....AVR   | RPLEQEA... | .....      |
| scpo  | GLESAVDSNE | ALFSK.....  | .....VLR   | RPIEKETGAD | E.....S    |
| sace  | DFEAIVKEHF | DMLSK.....  | .....TCR   | SDIAKYDGS. | K.....T    |
| ledo  | .INQTLRGVW | TTMDQ.....  | .....KPSD  | AELVAEE... | .....D     |
| lema  | .INQTLRGVW | TTMDQ.....  | .....KPSD  | AELVAEE... | .....D     |
| arth  | NIKDSIGSTL | LLSSL.....  | .....MPSH  | AVIIADEF T | PKE...TSD  |
| teth  | AIQSDLEAVQ | KVLKK.....  | .....P.L   | VPLSEKN... | .....AA    |
| encu  | ...DLKGIVS | KYFDI.....  | .....S.F   | GSLGALSGRG | .....E     |
| nolo  | .....      | .....       | .....      | .....      | .....      |

|         |            |            |           |             |           |     |
|---------|------------|------------|-----------|-------------|-----------|-----|
| plfa    | HMLNENEYIK | KCLRR..... | .....N.L  | NIIDLEKDVQ  | N.....    | LT  |
| plyo    | NMIKETEYIH | KCLRR..... | .....N.L  | NIINTVDQME  | K.....    | LQ  |
| chtr    | IVQEAFALHK | EYICE..... | .....ETLT | TSVSVIDYK.  | .....     |     |
| chmu    | IVQEAFSQYE | EYICE..... | .....ETLT | TSVSFIDDK.  | .....     |     |
| chpn    | AVHRAFLDYE | NYICE..... | .....ETLI | IAYDFTQDSD  | .....     |     |
| trde    | ELEKAFELFK | D.....     | .....     | .....       | .....     |     |
| trpa    | CARKAYDLHR | SYIVG..... | .....ETLA | AHVQWARVRD  | G.....    |     |
| bobu    | .LKEMLNKFE | KYIKT..... | .....ETLA | LNIIILNKSK. | .....     |     |
| myle    | ERADWARVHR | DFIAR..... | .....EIL  | .ATSFE....  | .....     | FGE |
| mytu    | EREDWARTH  | DLIAG..... | .....EIL  | .ATDFE....  | .....     | FAD |
| codi    | EKKEWALRHT | DMIAG..... | .....EVL  | .ATSFE....  | .....     | VVT |
| ripr    | DLSKIIDHYG | DFIKE..... | .....QTL  | GEFAKN....  | .....     | FTP |
| rico    | NLSKIIDNYG | DFIKE..... | .....QTL  | GEFAKN....  | .....     | FTP |
| psfl    | YVDEILVHHE | DWLKS..... | .....QLL  | VQSLLRSDL.  | .....     | EAP |
| suso    | .RVKTIQKWE | EFIKS..... | .....ETRA | SNIILG....  | EAKG..... |     |
| aepe    | .VVEAVNALK | EYIKR..... | .....ETRA | LKLEVG....  | EPPSG.... | V   |
| arfu    | ...LVKGWE  | DYIKS..... | .....ETRS | QKLVFG....  | KAEG..... |     |
| meba    | .VLRLVETLK | DLIAE..... | .....EVRA | EILNLGSDID  | VSGA..... |     |
| meth    | .R.ELTEPQR | EFVEN..... | .....EVRA | SHLSFD...Y  | TELE..... |     |
| pyho    | .NRELLQENL | DYIMR..... | .....ETRA | IEVRFE....  | EAKG..... |     |
| pyfu    | .NRELLQENL | EYIMR..... | .....ETRA | IEVRFE....  | EAKG..... |     |
| pyab    | .NVELLKENL | DYIMR..... | .....ETRA | DKIVFG....  | KAKG..... |     |
| meja    | .LDEFKEII  | EREVR..... | .....GQFV | DEIKAD....  | YEKD..... |     |
| haNRC   | .VGELVARHE | PLITA..... | .....ETRA | RELGEV....  | .EDG..... |     |
| pyba    | .IKKAVEQYR | DYIAR..... | .....ETRA | VKLIID...A  | VSQG..... |     |
| bacel   | .....      | .....      | .....     | .....       | .....     |     |
| baan1   | .....      | .....      | .....     | .....       | .....     |     |
| bast    | .....      | .....      | .....     | .....       | .....     |     |
| basu    | .....      | .....      | .....     | .....       | .....     |     |
| baha    | .....      | .....      | .....     | .....       | .....     |     |
| limo    | .....      | .....      | .....     | .....       | .....     |     |
| liin    | .....      | .....      | .....     | .....       | .....     |     |
| stau    | .....      | .....      | .....     | .....       | .....     |     |
| stpy    | .....      | .....      | .....     | .....       | .....     |     |
| stmu    | .....      | .....      | .....     | .....       | .....     |     |
| stpn    | .....      | .....      | .....     | .....       | .....     |     |
| lala    | .....      | .....      | .....     | .....       | .....     |     |
| enfa    | .....      | .....      | .....     | .....       | .....     |     |
| syne    | .....      | .....      | .....     | .....       | .....     |     |
| arthchl | .....      | .....      | .....     | .....       | .....     |     |
| prma    | .....      | .....      | .....     | .....       | .....     |     |
| mypu    | .....      | .....      | .....     | .....       | .....     |     |
| myge    | .....      | .....      | .....     | .....       | .....     |     |
| mypn    | .....      | .....      | .....     | .....       | .....     |     |
| urur    | .....      | .....      | .....     | .....       | .....     |     |
| saty    | .....      | .....      | .....     | .....       | .....     |     |
| esco    | .....      | .....      | .....     | .....       | .....     |     |
| yepe    | .....      | .....      | .....     | .....       | .....     |     |
| vich    | .....      | .....      | .....     | .....       | .....     |     |
| hain    | .....      | .....      | .....     | .....       | .....     |     |
| acac    | .....      | .....      | .....     | .....       | .....     |     |
| pamu    | .....      | .....      | .....     | .....       | .....     |     |

```

psae .....
psfl_1 .....
xyfa .....
neme .....
buAPS .....
agtu .....
sime .....
melo .....
cacr .....
hepy26695 .....
hepyj99 .....
caje .....
thma .....
fepe .....
aqae .....

```

```

1651 1700

```

```

mask ~~~~~
stau2 ... IDEYENT IHFNKEIKI SLLY.....
bace2 ... LTNEDDE LSLGETKVRI KL.....
baan2 ... LTNEDDE LSLGETKVRI KLSTAQ....
ocih ... KE.DMKQ VTVNDTEMGL SIV.....
clpe ... NA.DYSE AKVNGEILKM AVSKR.....
clac ... NK.EAAI YNINGEELNV FVKKNC....
cldi ... D.....
pogi ... DAVSDG VELDFDDFVL SIQVVKHQG.
bafR ... DEVKDG TELNFDDFSL FVNVVKE...
feac .....
thvo ... TDD.LRK WEIGDETIGI RIEKVVPK..
thnw ... VEG.MKL WEINGEPVRI KIDLAR....
cyhu .....
chte ... LDDSQPG DGVEQVNNEL CRLSLEKSGS
dera ... GEG.... .FRAEVEGGA VTLKKL....
stco ... ADDSYGA PFTDEGLSLV FRLRKQ....
thth .....
deet .....
anga PNPPSRKAS. ..LLEGRSL GKP..... .LTFDQLHQ EVVTLFGLKD
drme SEQASKKR.. ..LIATQR..
hosa PKGDNRLDL. ..LKLKSVVT SIFGVKNTL AVFHDETEIQ NQTDLLSLSG
cael VHVKTEKEH. ..LKGADLL YHVR..... SALDLWNGKI
asfu .LIMEEQE. ..VQATFLL RLLKL.....
scpo NIIASEEQD. ..VQGATFLL SLLRL.....
sace DPIGDEEQS. ..INDTIFKL KVFKL.....
ledo NSISGVAER. ..LDLTKPKT
lema NSISGVAER. ..LDLTKPKT
arth ESVKVPKLS YKISLARPAL KFNEEAVLAL Y.SGESPSHH NRFSL SILSR
teth LKIVENSLLT FQVDEESVTI EIAYA.....
encu YEFDGTLYP. ..VS LYKKL.
nolo .....
plfa DKFFEEKIT. ..VNEKEVLV IFTNQ.....
plyo NKFHQETFT. ..VSGQEVIA IFTQN.....
chtr ... EGEEWD. ..INGHAVSF VLERVER....

```

|         |            |            |            |       |       |
|---------|------------|------------|------------|-------|-------|
| chmu    | ...EGEWD.  | ..VNGHAVSL | SLEVIGH... | ..... | ..... |
| chpn    | ..FQGENWD. | ..INGHATQI | EITVSSIDS. | ..... | ..... |
| trde    | .....      | .....      | .....      | ..... | ..... |
| trpa    | ..ASAVYVK. | ..SDAVLWEV | SIDKA..... | ..... | ..... |
| bobu    | ..LEKKINL. | ..ADDIFTLI | GIEKC..... | ..... | ..... |
| myle    | .PADSVAIG. | ...DG..VRV | SLLKV..... | ..... | ..... |
| mytu    | .LADGVAIG. | ...DG..VRV | SIEKT..... | ..... | ..... |
| codi    | GEPAEHDIV. | ...AG..VTA | TVQKV..... | ..... | ..... |
| ripr    | DYVSKVALE. | ...NNQ.IQL | KVKRL..... | ..... | ..... |
| rico    | DYVSKVALE. | ...NHQ.IQL | KVKKS..... | ..... | ..... |
| psfl    | LAVDEVELP. | ...EGDPVRI | QLRRSVLA.. | ..... | ..... |
| suso    | DITMDWDIE. | ...GESYII  | GIKKST.... | ..... | ..... |
| aepe    | EVLREWELD. | ...GEKVVI  | ALKRAAASG. | ..... | ..... |
| arfu    | .YVREWNIE. | ...GKKVKI  | GIKRLRG... | ..... | ..... |
| meba    | .LVKDWDVE. | ...GIAMKM  | GISKK..... | ..... | ..... |
| meth    | .YTKEWKIS. | ...DENLII  | SIKPSDKV.. | ..... | ..... |
| pyho    | .YVVEWP... | ...EVQAKI  | GIEKVE.... | ..... | ..... |
| pyfu    | .YVVEWP... | ...EVQAKI  | GIEKIE.... | ..... | ..... |
| pyab    | .YVVEWP... | ...EVQAKI  | GIEKVEE... | ..... | ..... |
| meja    | .WEIKTPNGE | ...KYNVKI  | AIERINK... | ..... | ..... |
| haNRC   | .HREEWDVE. | ...GTTMIL  | EVEAV..... | ..... | ..... |
| pyba    | ...KEWDIS. | ...GEKVVI  | EIRKAQA... | ..... | ..... |
| bacel   | .....      | .....      | .....      | ..... | ..... |
| baanl   | .....      | .....      | .....      | ..... | ..... |
| bast    | .....      | .....      | .....      | ..... | ..... |
| basu    | .....      | .....      | .....      | ..... | ..... |
| baha    | .....      | .....      | .....      | ..... | ..... |
| limo    | .....      | .....      | .....      | ..... | ..... |
| liin    | .....      | .....      | .....      | ..... | ..... |
| stau    | .....      | .....      | .....      | ..... | ..... |
| stpy    | .....      | .....      | .....      | ..... | ..... |
| stmu    | .....      | .....      | .....      | ..... | ..... |
| stpn    | .....      | .....      | .....      | ..... | ..... |
| lala    | .....      | .....      | .....      | ..... | ..... |
| enfa    | .....      | .....      | .....      | ..... | ..... |
| syne    | .....      | .....      | .....      | ..... | ..... |
| arthchl | .....      | .....      | .....      | ..... | ..... |
| prma    | .....      | .....      | .....      | ..... | ..... |
| mypu    | .....      | .....      | .....      | ..... | ..... |
| myge    | .....      | .....      | .....      | ..... | ..... |
| mypn    | .....      | .....      | .....      | ..... | ..... |
| urur    | .....      | .....      | .....      | ..... | ..... |
| saty    | .....      | .....      | .....      | ..... | ..... |
| esco    | .....      | .....      | .....      | ..... | ..... |
| yepe    | .....      | .....      | .....      | ..... | ..... |
| vich    | .....      | .....      | .....      | ..... | ..... |
| hain    | .....      | .....      | .....      | ..... | ..... |
| acac    | .....      | .....      | .....      | ..... | ..... |
| pamu    | .....      | .....      | .....      | ..... | ..... |
| psae    | .....      | .....      | .....      | ..... | ..... |
| psfl_1  | .....      | .....      | .....      | ..... | ..... |
| xyfa    | .....      | .....      | .....      | ..... | ..... |

|           |       |       |       |       |       |
|-----------|-------|-------|-------|-------|-------|
| neme      | ..... | ..... | ..... | ..... | ..... |
| buAPS     | ..... | ..... | ..... | ..... | ..... |
| agtu      | ..... | ..... | ..... | ..... | ..... |
| sime      | ..... | ..... | ..... | ..... | ..... |
| melo      | ..... | ..... | ..... | ..... | ..... |
| cacr      | ..... | ..... | ..... | ..... | ..... |
| hepy26695 | ..... | ..... | ..... | ..... | ..... |
| hepyj99   | ..... | ..... | ..... | ..... | ..... |
| caje      | ..... | ..... | ..... | ..... | ..... |
| thma      | ..... | ..... | ..... | ..... | ..... |
| fepe      | ..... | ..... | ..... | ..... | ..... |
| aqae      | ..... | ..... | ..... | ..... | ..... |

1701

1750

|       |            |            |            |            |            |
|-------|------------|------------|------------|------------|------------|
| mask  | ~~~~~      | ~~~~~      | ~~~~~      | ~~~~~      | ~~~~~      |
| stau2 | .....      | .....      | .....      | .....      | .....      |
| bace2 | .....      | .....      | .....      | .....      | .....      |
| baan2 | .....      | .....      | .....      | .....      | .....      |
| ocih  | .....      | .....      | .....      | .....      | .....      |
| clpe  | .....      | .....      | .....      | .....      | .....      |
| clac  | .....      | .....      | .....      | .....      | .....      |
| cldi  | .....      | .....      | .....      | .....      | .....      |
| pogi  | .....      | .....      | .....      | .....      | .....      |
| bafr  | .....      | .....      | .....      | .....      | .....      |
| feac  | .....      | .....      | .....      | .....      | .....      |
| thvo  | .....      | .....      | .....      | .....      | .....      |
| thnw  | .....      | .....      | .....      | .....      | .....      |
| cyhu  | .....      | .....      | .....      | .....      | .....      |
| chte  | .....      | .....      | .....      | .....      | .....      |
| dera  | .....      | .....      | .....      | .....      | .....      |
| stco  | .....      | .....      | .....      | .....      | .....      |
| thth  | .....      | .....      | .....      | .....      | .....      |
| deet  | .....      | .....      | .....      | .....      | .....      |
| anga  | VQFNVLAGPD | GRRLDAS... | .....      | .SYDPKALHQ | QTLYVTLGES |
| drme  | .....      | .....      | .....      | .....      | .....      |
| hosa  | KTLCVTAGSA | PSLINSSSTL | LCQYINLQLL | NAKPQECLMG | TVGTLLLENP |
| cael  | ALKNVDGSAV | HPTVDVT... | .....      | ...S...LVG | QTLQLVR... |
| asfu  | .....      | .....      | .....      | .....      | .....      |
| scpo  | .....      | .....      | .....      | .....      | .....      |
| sace  | .....      | .....      | .....      | .....      | .....      |
| ledo  | .....      | .....      | .....      | .....      | .....      |
| lema  | .....      | .....      | .....      | .....      | .....      |
| arth  | FLFNVYIYGS | RRCEICN... | .....      | RASNILVIKG | SFEFEVRVPS |
| teth  | .....      | .....      | .....      | .....      | .....      |
| encu  | .....      | .....      | .....      | .....      | .....      |
| nolo  | .....      | .....      | .....      | .....      | .....      |
| plfa  | .....      | .....      | .....      | .....      | .....      |
| plyo  | .....      | .....      | .....      | .....      | .....      |
| chtr  | .....      | .....      | .....      | .....      | .....      |
| chmu  | .....      | .....      | .....      | .....      | .....      |
| chpn  | .....      | .....      | .....      | .....      | .....      |
| trde  | .....      | .....      | .....      | .....      | .....      |

|         |       |       |       |       |       |
|---------|-------|-------|-------|-------|-------|
| trpa    | ..... | ..... | ..... | ..... | ..... |
| bobu    | ..... | ..... | ..... | ..... | ..... |
| myle    | ..... | ..... | ..... | ..... | ..... |
| mytu    | ..... | ..... | ..... | ..... | ..... |
| codi    | ..... | ..... | ..... | ..... | ..... |
| ripr    | ..... | ..... | ..... | ..... | ..... |
| rico    | ..... | ..... | ..... | ..... | ..... |
| psfl    | ..... | ..... | ..... | ..... | ..... |
| suso    | ..... | ..... | ..... | ..... | ..... |
| aepe    | ..... | ..... | ..... | ..... | ..... |
| arfu    | ..... | ..... | ..... | ..... | ..... |
| meba    | ..... | ..... | ..... | ..... | ..... |
| meth    | ..... | ..... | ..... | ..... | ..... |
| pyho    | ..... | ..... | ..... | ..... | ..... |
| pyfu    | ..... | ..... | ..... | ..... | ..... |
| pyab    | ..... | ..... | ..... | ..... | ..... |
| meja    | ..... | ..... | ..... | ..... | ..... |
| haNRC   | ..... | ..... | ..... | ..... | ..... |
| pyba    | ..... | ..... | ..... | ..... | ..... |
| bacel   | ..... | ..... | ..... | ..... | ..... |
| baan1   | ..... | ..... | ..... | ..... | ..... |
| bast    | ..... | ..... | ..... | ..... | ..... |
| basu    | ..... | ..... | ..... | ..... | ..... |
| baha    | ..... | ..... | ..... | ..... | ..... |
| limo    | ..... | ..... | ..... | ..... | ..... |
| liin    | ..... | ..... | ..... | ..... | ..... |
| stau    | ..... | ..... | ..... | ..... | ..... |
| stpy    | ..... | ..... | ..... | ..... | ..... |
| stmu    | ..... | ..... | ..... | ..... | ..... |
| stpn    | ..... | ..... | ..... | ..... | ..... |
| lala    | ..... | ..... | ..... | ..... | ..... |
| enfa    | ..... | ..... | ..... | ..... | ..... |
| syne    | ..... | ..... | ..... | ..... | ..... |
| arthchl | ..... | ..... | ..... | ..... | ..... |
| prma    | ..... | ..... | ..... | ..... | ..... |
| mypu    | ..... | ..... | ..... | ..... | ..... |
| myge    | ..... | ..... | ..... | ..... | ..... |
| mypn    | ..... | ..... | ..... | ..... | ..... |
| urur    | ..... | ..... | ..... | ..... | ..... |
| saty    | ..... | ..... | ..... | ..... | ..... |
| esco    | ..... | ..... | ..... | ..... | ..... |
| yepe    | ..... | ..... | ..... | ..... | ..... |
| vich    | ..... | ..... | ..... | ..... | ..... |
| hain    | ..... | ..... | ..... | ..... | ..... |
| acac    | ..... | ..... | ..... | ..... | ..... |
| pamu    | ..... | ..... | ..... | ..... | ..... |
| psae    | ..... | ..... | ..... | ..... | ..... |
| psfl_1  | ..... | ..... | ..... | ..... | ..... |
| xyfa    | ..... | ..... | ..... | ..... | ..... |
| neme    | ..... | ..... | ..... | ..... | ..... |
| buAPS   | ..... | ..... | ..... | ..... | ..... |
| agtu    | ..... | ..... | ..... | ..... | ..... |

```

sime .....
melo .....
cacr .....
hepy26695 .....
hepyj99 .....
caje .....
thma .....
fepe .....
aqae .....

```

1751

1800

```

mask ~~~~~
stau2 .....
bace2 .....
baan2 .....
ocih .....
clpe .....
clac .....
cldi .....
pogi .....
bafr .....
feac .....
thvo .....
thnw .....
cyhu .....
chte .....
dera .....
stco .....
thth .....
deet .....
anga LPAAGWTPSR MPYAAFRNVQ SANGRSTTVF ...EENPVGV KLPVPAL...
drme .....
hosa LGQNGLTHQG LLYEAAKVFG LRSRKLKFL NETQTQEITE DIPVKTLNMK
cael .....
asfu .....
scpo .....
sace .....
ledo .....
lema .....
arth RRWEGSLVKL LLTQIVYFII LMYLVWQITV SCIENVPVAT VVLGEHLHLS
teth .....
encu .....
nolo .....
plfa .....
plyo .....
chtr .....
chmu .....
chpn .....
trde .....
trpa .....
bobu .....
myle .....

```

|         |       |       |       |       |       |
|---------|-------|-------|-------|-------|-------|
| mytu    | ..... | ..... | ..... | ..... | ..... |
| codi    | ..... | ..... | ..... | ..... | ..... |
| ripr    | ..... | ..... | ..... | ..... | ..... |
| rico    | ..... | ..... | ..... | ..... | ..... |
| psfl    | ..... | ..... | ..... | ..... | ..... |
| suso    | ..... | ..... | ..... | ..... | ..... |
| aepe    | ..... | ..... | ..... | ..... | ..... |
| arfu    | ..... | ..... | ..... | ..... | ..... |
| meba    | ..... | ..... | ..... | ..... | ..... |
| meth    | ..... | ..... | ..... | ..... | ..... |
| pyho    | ..... | ..... | ..... | ..... | ..... |
| pyfu    | ..... | ..... | ..... | ..... | ..... |
| pyab    | ..... | ..... | ..... | ..... | ..... |
| meja    | ..... | ..... | ..... | ..... | ..... |
| haNRC   | ..... | ..... | ..... | ..... | ..... |
| pyba    | ..... | ..... | ..... | ..... | ..... |
| bacel   | ..... | ..... | ..... | ..... | ..... |
| baan1   | ..... | ..... | ..... | ..... | ..... |
| bast    | ..... | ..... | ..... | ..... | ..... |
| basu    | ..... | ..... | ..... | ..... | ..... |
| baha    | ..... | ..... | ..... | ..... | ..... |
| limo    | ..... | ..... | ..... | ..... | ..... |
| liin    | ..... | ..... | ..... | ..... | ..... |
| stau    | ..... | ..... | ..... | ..... | ..... |
| stpy    | ..... | ..... | ..... | ..... | ..... |
| stmu    | ..... | ..... | ..... | ..... | ..... |
| stpn    | ..... | ..... | ..... | ..... | ..... |
| lala    | ..... | ..... | ..... | ..... | ..... |
| enfa    | ..... | ..... | ..... | ..... | ..... |
| syne    | ..... | ..... | ..... | ..... | ..... |
| arthchl | ..... | ..... | ..... | ..... | ..... |
| prma    | ..... | ..... | ..... | ..... | ..... |
| mypu    | ..... | ..... | ..... | ..... | ..... |
| myge    | ..... | ..... | ..... | ..... | ..... |
| mypn    | ..... | ..... | ..... | ..... | ..... |
| urur    | ..... | ..... | ..... | ..... | ..... |
| saty    | ..... | ..... | ..... | ..... | ..... |
| esco    | ..... | ..... | ..... | ..... | ..... |
| yepe    | ..... | ..... | ..... | ..... | ..... |
| vich    | ..... | ..... | ..... | ..... | ..... |
| hain    | ..... | ..... | ..... | ..... | ..... |
| acac    | ..... | ..... | ..... | ..... | ..... |
| pamu    | ..... | ..... | ..... | ..... | ..... |
| psae    | ..... | ..... | ..... | ..... | ..... |
| psfl_1  | ..... | ..... | ..... | ..... | ..... |
| xyfa    | ..... | ..... | ..... | ..... | ..... |
| neme    | ..... | ..... | ..... | ..... | ..... |
| buAPS   | ..... | ..... | ..... | ..... | ..... |
| agtu    | ..... | ..... | ..... | ..... | ..... |
| sime    | ..... | ..... | ..... | ..... | ..... |
| melo    | ..... | ..... | ..... | ..... | ..... |
| cacr    | ..... | ..... | ..... | ..... | ..... |



```

hepy26695 .....
hepyj99 .....
caje .....
thma .....
fepe .....
aqae .....

```

```

1801      1813

```

```

mask ~~~~~ ~~~
stau2 .....
bace2 .....
baan2 .....
ocih .....
clpe .....
clac .....
cldi .....
pogi .....
bafr .....
feac .....
thvo .....
thnw .....
cyhu .....
chte .....
dera .....
stco .....
thth .....
deet .....
anga .....
drme .....
hosa TVYVSVLPTT ADF
cael .....
asfu .....
scpo .....
sace .....
ledo .....
lema .....
arth VGDDLLSKRN A..
teth .....
encu .....
nolo .....
plfa .....
plyo .....
chtr .....
chmu .....
chpn .....
trde .....
trpa .....
bobu .....
myle .....
mytu .....
codi .....
ripr .....

```

rico .....  
psfl .....  
susos .....  
aepe .....  
arfu .....  
meba .....  
meth .....  
pyho .....  
pyfu .....  
pyab .....  
meja .....  
haNRC .....  
pyba .....  
bacel .....  
baan1 .....  
bast .....  
basu .....  
baha .....  
limo .....  
liin .....  
stau .....  
stpy .....  
stmu .....  
stpn .....  
lala .....  
enfa .....  
syne .....  
arthchl .....  
prma .....  
mypu .....  
myge .....  
mypn .....  
urur .....  
saty .....  
esco .....  
yepe .....  
vich .....  
hain .....  
acac .....  
pamu .....  
psae .....  
psfl\_1 .....  
xyfa .....  
neme .....  
buAPS .....  
agtu .....  
sime .....  
melo .....  
cacr .....  
hepy26695 .....  
hepyj99 .....  
caje .....

thma .....  
fepe .....  
aqae .....
