# Supplementary material
Source: PubMed Central journal article supplement (PMC1326320)
Supplement: 4-embor881-s2.pdf [file 4-embor881-s2.pdf]

## Methionyl-tRNA synthetase multiple sequence alignment

Note: Sequence abbreviations correspond to the first two letters of the genus and species name in the phylogeny shown in Figure 3 in Brown et al. Stpn2 and Baan2 are the putative drug resistant methionyl-tRNA synthetases. The mask (\*) denotes those positions included in edited alignment used for phylogenetic analysis.

mrs\_suppl\_ER.msf MSF: 1362 Type: P February 27, 2003 16:55 Check: 3269

```
..
Name: mask           Len: 1362 Check: 7778 Weight: 0.70
Name: stpn2          Len: 1362 Check: 2584 Weight: 1.10
Name: bace2           Len: 1362 Check: 1170 Weight: 0.60
Name: baan2           Len: 1362 Check: 8941 Weight: 0.60
Name: clpe2           Len: 1362 Check: 1991 Weight: 1.30
Name: deet            Len: 1362 Check: 6707 Weight: 1.20
Name: codi            Len: 1362 Check: 1617 Weight: 1.30
Name: thnw            Len: 1362 Check: 5144 Weight: 0.90
Name: thvo            Len: 1362 Check: 8406 Weight: 0.90
Name: pogi            Len: 1362 Check: 7789 Weight: 0.70
Name: bafr            Len: 1362 Check: 4727 Weight: 0.70
Name: cyhu            Len: 1362 Check: 7398 Weight: 0.90
Name: chte            Len: 1362 Check: 1411 Weight: 1.20
Name: chmu            Len: 1362 Check: 1611 Weight: 0.60
Name: chtr            Len: 1362 Check: 925 Weight: 0.60
Name: chpn            Len: 1362 Check: 815 Weight: 0.90
Name: fugu            Len: 1362 Check: 1692 Weight: 0.80
Name: hosa            Len: 1362 Check: 778 Weight: 0.80
Name: anga            Len: 1362 Check: 5345 Weight: 0.80
Name: drme            Len: 1362 Check: 143 Weight: 0.80
Name: sace            Len: 1362 Check: 8511 Weight: 1.10
Name: scpo            Len: 1362 Check: 62 Weight: 1.10
Name: didi            Len: 1362 Check: 2599 Weight: 1.00
Name: arth            Len: 1362 Check: 3689 Weight: 0.80
Name: orsa            Len: 1362 Check: 3609 Weight: 0.80
Name: cael            Len: 1362 Check: 1674 Weight: 1.10
Name: encu            Len: 1362 Check: 6348 Weight: 1.30
Name: trde            Len: 1362 Check: 1545 Weight: 0.90
Name: trpa            Len: 1362 Check: 5107 Weight: 1.00
Name: bobu            Len: 1362 Check: 2856 Weight: 1.10
Name: cacr            Len: 1362 Check: 4064 Weight: 1.30
Name: suto            Len: 1362 Check: 5381 Weight: 0.80
Name: suso            Len: 1362 Check: 4068 Weight: 0.80
Name: aepe            Len: 1362 Check: 6460 Weight: 1.00
Name: pyba            Len: 1362 Check: 3582 Weight: 1.10
Name: pyho            Len: 1362 Check: 7912 Weight: 0.50
Name: pyab            Len: 1362 Check: 1168 Weight: 0.50
Name: pyfu            Len: 1362 Check: 982 Weight: 0.60
Name: meja            Len: 1362 Check: 39 Weight: 1.20
Name: meth            Len: 1362 Check: 9734 Weight: 1.10
```

|                 |           |             |              |
|-----------------|-----------|-------------|--------------|
| Name: arfu      | Len: 1362 | Check: 2953 | Weight: 1.20 |
| Name: hanrc     | Len: 1362 | Check: 5969 | Weight: 1.30 |
| Name: psfl      | Len: 1362 | Check: 411  | Weight: 0.60 |
| Name: psae      | Len: 1362 | Check: 9238 | Weight: 0.60 |
| Name: esco      | Len: 1362 | Check: 1559 | Weight: 0.30 |
| Name: saty      | Len: 1362 | Check: 2470 | Weight: 0.30 |
| Name: yepe      | Len: 1362 | Check: 9445 | Weight: 0.50 |
| Name: vich      | Len: 1362 | Check: 3428 | Weight: 0.60 |
| Name: haein     | Len: 1362 | Check: 7216 | Weight: 0.60 |
| Name: acac      | Len: 1362 | Check: 1188 | Weight: 0.60 |
| Name: pamu      | Len: 1362 | Check: 1108 | Weight: 0.60 |
| Name: neme      | Len: 1362 | Check: 3299 | Weight: 0.50 |
| Name: nogo      | Len: 1362 | Check: 9324 | Weight: 0.50 |
| Name: xyfa      | Len: 1362 | Check: 745  | Weight: 1.00 |
| Name: buAPS     | Len: 1362 | Check: 9642 | Weight: 1.10 |
| Name: sime      | Len: 1362 | Check: 2002 | Weight: 0.50 |
| Name: agtu      | Len: 1362 | Check: 9908 | Weight: 0.50 |
| Name: brsu      | Len: 1362 | Check: 2745 | Weight: 0.60 |
| Name: melo      | Len: 1362 | Check: 1945 | Weight: 0.60 |
| Name: rhpa      | Len: 1362 | Check: 2243 | Weight: 0.70 |
| Name: mytu      | Len: 1362 | Check: 7503 | Weight: 0.90 |
| Name: rhru      | Len: 1362 | Check: 5773 | Weight: 0.90 |
| Name: noar      | Len: 1362 | Check: 5341 | Weight: 1.00 |
| Name: rico      | Len: 1362 | Check: 1920 | Weight: 0.60 |
| Name: ripr      | Len: 1362 | Check: 2105 | Weight: 0.60 |
| Name: plyo      | Len: 1362 | Check: 3699 | Weight: 1.00 |
| Name: plfa      | Len: 1362 | Check: 2144 | Weight: 1.00 |
| Name: clpel     | Len: 1362 | Check: 1676 | Weight: 0.70 |
| Name: clac      | Len: 1362 | Check: 275  | Weight: 0.70 |
| Name: liin      | Len: 1362 | Check: 6845 | Weight: 0.30 |
| Name: limo      | Len: 1362 | Check: 5227 | Weight: 0.30 |
| Name: baan1     | Len: 1362 | Check: 6790 | Weight: 0.30 |
| Name: bacel     | Len: 1362 | Check: 2384 | Weight: 0.30 |
| Name: basu      | Len: 1362 | Check: 7169 | Weight: 0.60 |
| Name: bast      | Len: 1362 | Check: 7444 | Weight: 0.60 |
| Name: baha      | Len: 1362 | Check: 6042 | Weight: 0.60 |
| Name: enfa      | Len: 1362 | Check: 6492 | Weight: 0.70 |
| Name: ocih      | Len: 1362 | Check: 5799 | Weight: 1.00 |
| Name: stpy      | Len: 1362 | Check: 2911 | Weight: 0.50 |
| Name: stpn      | Len: 1362 | Check: 1693 | Weight: 0.50 |
| Name: stmu      | Len: 1362 | Check: 7429 | Weight: 0.50 |
| Name: lala      | Len: 1362 | Check: 6131 | Weight: 0.70 |
| Name: stau      | Len: 1362 | Check: 957  | Weight: 0.90 |
| Name: oeoe      | Len: 1362 | Check: 8982 | Weight: 1.00 |
| Name: thma      | Len: 1362 | Check: 7588 | Weight: 1.10 |
| Name: thth      | Len: 1362 | Check: 8967 | Weight: 1.10 |
| Name: dera      | Len: 1362 | Check: 674  | Weight: 1.20 |
| Name: stco      | Len: 1362 | Check: 8545 | Weight: 1.20 |
| Name: hepyj99   | Len: 1362 | Check: 5454 | Weight: 0.60 |
| Name: hepy26695 | Len: 1362 | Check: 7355 | Weight: 0.60 |
| Name: caje      | Len: 1362 | Check: 7971 | Weight: 1.10 |
| Name: aqae      | Len: 1362 | Check: 9699 | Weight: 1.00 |

|              |           |             |              |
|--------------|-----------|-------------|--------------|
| Name: funu   | Len: 1362 | Check: 2499 | Weight: 1.20 |
| Name: trer   | Len: 1362 | Check: 6627 | Weight: 0.90 |
| Name: sy6803 | Len: 1362 | Check: 3226 | Weight: 0.90 |
| Name: arth_1 | Len: 1362 | Check: 4040 | Weight: 1.10 |
| Name: prma   | Len: 1362 | Check: 4848 | Weight: 1.20 |
| Name: caelmt | Len: 1362 | Check: 6957 | Weight: 0.80 |
| Name: hosamt | Len: 1362 | Check: 8478 | Weight: 0.70 |
| Name: tarumt | Len: 1362 | Check: 7974 | Weight: 1.00 |
| Name: drmemt | Len: 1362 | Check: 5162 | Weight: 1.10 |
| Name: anga2  | Len: 1362 | Check: 4315 | Weight: 1.00 |
| Name: didimt | Len: 1362 | Check: 4450 | Weight: 1.10 |
| Name: caabmt | Len: 1362 | Check: 5358 | Weight: 1.30 |
| Name: sacemt | Len: 1362 | Check: 8537 | Weight: 1.30 |
| Name: scpomt | Len: 1362 | Check: 6804 | Weight: 1.30 |
| Name: lema   | Len: 1362 | Check: 2900 | Weight: 1.30 |
| Name: myge   | Len: 1362 | Check: 4843 | Weight: 1.00 |
| Name: mypn   | Len: 1362 | Check: 832  | Weight: 1.00 |
| Name: urur   | Len: 1362 | Check: 6275 | Weight: 1.20 |
| Name: mypu   | Len: 1362 | Check: 6960 | Weight: 1.30 |

//

|       |            |            |            |            |            |
|-------|------------|------------|------------|------------|------------|
|       | 1          |            |            |            | 50         |
| mask  | .....      | .....      | .....      | .....      | .....      |
| stpn2 | .....      | .....      | .....      | .....      | .....      |
| bace2 | .....      | .....      | .....      | .....      | .....      |
| baan2 | .....      | .....      | .....      | .....      | .....      |
| clpe2 | .....      | .....      | .....      | .....      | .....      |
| deet  | .....      | .....      | .....      | .....      | .....      |
| codi  | .....      | .....      | .....      | .....      | .....      |
| thnw  | .....      | .....      | .....      | .....      | .....      |
| thvo  | .....      | .....      | .....      | .....      | .....      |
| pogi  | .....      | .....      | .....      | .....      | .....      |
| bafr  | .....      | .....      | .....      | .....      | .....      |
| cyhu  | .....      | .....      | .....      | .....      | .....      |
| chte  | .....      | .....      | .....      | .....      | .....      |
| chmu  | .....      | .....      | .....      | .....      | .....      |
| chtr  | .....      | .....      | .....      | .....      | .....      |
| chpn  | .....      | .....      | .....      | .....      | .....      |
| fugu  | .....      | .....      | .....      | .....      | .....      |
| hosa  | ...MRLFVS  | DGVPGLPVL  | AAAGRARGRA | EVLISTVGPE | DCVVPFLTRP |
| anga  | CICDMIIYTN | TGNPFGLKLL | ICANLAKTNV | EVKHVTLNDP | ...ALGDMK  |
| drme  | .....      | .....      | .....      | .....      | .....      |
| sace  | .....      | .....      | .....      | .....      | .....MSF   |
| scpo  | .....      | .....      | .....      | .....      | .....MATY  |
| didi  | .....      | .....      | .....      | .....      | .....      |
| arth  | .....      | .....      | .....      | .....      | .....      |
| orsa  | .....      | .....      | .....      | .....      | .....      |
| cael  | .....      | .....      | .....      | .....      | .....      |
| encu  | .....      | .....      | .....      | .....      | .....      |
| trde  | .....      | .....      | .....      | .....      | .....      |
| trpa  | .....      | .....      | .....      | .....      | .....      |

|       |       |       |       |            |            |
|-------|-------|-------|-------|------------|------------|
| bobu  | ..... | ..... | ..... | .....      | .....      |
| cacr  | ..... | ..... | ..... | .....      | .....      |
| suto  | ..... | ..... | ..... | .....      | .....      |
| suso  | ..... | ..... | ..... | .....      | .....      |
| aepe  | ..... | ..... | ..... | .....      | .....      |
| pyba  | ..... | ..... | ..... | .....      | .....      |
| pyho  | ..... | ..... | ..... | .....      | .....      |
| pyab  | ..... | ..... | ..... | .....      | .....      |
| pyfu  | ..... | ..... | ..... | .....      | .....      |
| meja  | ..... | ..... | ..... | .....      | .....      |
| meth  | ..... | ..... | ..... | .....      | .....      |
| arfu  | ..... | ..... | ..... | .....      | .....      |
| hanrc | ..... | ..... | ..... | .....      | .....      |
| psfl  | ..... | ..... | ..... | .....      | .....      |
| psae  | ..... | ..... | ..... | .....      | .....      |
| esco  | ..... | ..... | ..... | .....      | .....      |
| saty  | ..... | ..... | ..... | .....      | .....      |
| yepe  | ..... | ..... | ..... | .....      | .....      |
| vich  | ..... | ..... | ..... | .....      | .....      |
| haein | ..... | ..... | ..... | .....      | .....      |
| acac  | ..... | ..... | ..... | .....      | .....      |
| pamu  | ..... | ..... | ..... | .....      | .....      |
| neme  | ..... | ..... | ..... | .....      | .....      |
| nogo  | ..... | ..... | ..... | .....      | .....      |
| xyfa  | ..... | ..... | ..... | .....      | .....      |
| buAPS | ..... | ..... | ..... | .....      | .....      |
| sime  | ..... | ..... | ..... | .....      | .....      |
| agtu  | ..... | ..... | ..... | .....      | .....      |
| brsu  | ..... | ..... | ..... | .....      | .....      |
| melo  | ..... | ..... | ..... | .....      | .....      |
| rhpa  | ..... | ..... | ..... | .....      | .....      |
| mytu  | ..... | ..... | ..... | .....      | .....      |
| rhru  | ..... | ..... | ..... | .....      | .....      |
| noar  | ..... | ..... | ..... | .....      | .....      |
| rico  | ..... | ..... | ..... | .....      | .....      |
| ripr  | ..... | ..... | ..... | .....      | .....      |
| plyo  | ..... | ..... | ..... | .....      | .....      |
| plfa  | ..... | ..... | ..... | MMKPLNMILY | PHKFFLNTVK |
| clpel | ..... | ..... | ..... | .....      | .....      |
| clac  | ..... | ..... | ..... | .....      | .....      |
| liin  | ..... | ..... | ..... | .....      | .....      |
| limo  | ..... | ..... | ..... | .....      | .....      |
| baan1 | ..... | ..... | ..... | .....      | .....      |
| bacel | ..... | ..... | ..... | .....      | .....      |
| basu  | ..... | ..... | ..... | .....      | .....      |
| bast  | ..... | ..... | ..... | .....      | .....      |
| baha  | ..... | ..... | ..... | .....      | .....      |
| enfa  | ..... | ..... | ..... | .....      | .....      |
| ocih  | ..... | ..... | ..... | .....      | .....      |
| stpy  | ..... | ..... | ..... | .....      | .....      |
| stpn  | ..... | ..... | ..... | .....      | .....      |
| stmu  | ..... | ..... | ..... | .....      | .....      |

|           |       |       |       |       |       |
|-----------|-------|-------|-------|-------|-------|
| lala      | ..... | ..... | ..... | ..... | ..... |
| stau      | ..... | ..... | ..... | ..... | ..... |
| oeoe      | ..... | ..... | ..... | ..... | ..... |
| thma      | ..... | ..... | ..... | ..... | ..... |
| thth      | ..... | ..... | ..... | ..... | ..... |
| dera      | ..... | ..... | ..... | ..... | ..... |
| stco      | ..... | ..... | ..... | ..... | ..... |
| hepyj99   | ..... | ..... | ..... | ..... | ..... |
| hepy26695 | ..... | ..... | ..... | ..... | ..... |
| caje      | ..... | ..... | ..... | ..... | ..... |
| aqae      | ..... | ..... | ..... | ..... | ..... |
| funu      | ..... | ..... | ..... | ..... | ..... |
| trer      | ..... | ..... | ..... | ..... | ..... |
| sy6803    | ..... | ..... | ..... | ..... | ..... |
| arth_1    | ..... | ..... | ..... | ..... | ..... |
| prma      | ..... | ..... | ..... | ..... | ..... |
| caelmt    | ..... | ..... | ..... | ..... | ..... |
| hosamt    | ..... | ..... | ..... | ..... | ..... |
| tarumt    | ..... | ..... | ..... | ..... | ..... |
| drmemt    | ..... | ..... | ..... | ..... | ..... |
| anga2     | ..... | ..... | ..... | ..... | ..... |
| didimt    | ..... | ..... | ..... | ..... | ..... |
| caabmt    | ..... | ..... | ..... | ..... | ..... |
| sacemt    | ..... | ..... | ..... | ..... | ..... |
| scpomt    | ..... | ..... | ..... | ..... | ..... |
| lema      | ..... | ..... | ..... | ..... | ..... |
| myge      | ..... | ..... | ..... | ..... | ..... |
| mypn      | ..... | ..... | ..... | ..... | ..... |
| urur      | ..... | ..... | ..... | ..... | ..... |
| mypu      | ..... | ..... | ..... | ..... | ..... |

51

100

|       |            |            |            |             |            |
|-------|------------|------------|------------|-------------|------------|
| mask  | .....      | .....      | .....      | .....       | .....      |
| stpn2 | .....      | .....      | .....      | .....       | .....      |
| bace2 | .....      | .....      | .....      | .....       | .....      |
| baan2 | .....      | .....      | .....      | .....       | .....      |
| clpe2 | .....      | .....      | .....      | .....       | .....      |
| deet  | .....      | .....      | .....      | .....       | .....      |
| codi  | .....      | .....      | .....      | .....       | .....      |
| thnw  | .....      | .....      | .....      | .....       | .....      |
| thvo  | .....      | .....      | .....      | .....       | .....      |
| pogi  | .....      | .....      | .....      | .....       | .....      |
| bafr  | .....      | .....      | .....      | .....       | .....      |
| cyhu  | .....      | .....      | .....      | .....       | .....      |
| chte  | .....      | .....      | .....      | .....       | .....      |
| chmu  | .....      | .....      | .....      | .....       | .....      |
| chtr  | .....      | .....      | .....      | .....       | .....      |
| chpn  | .....      | .....      | .....      | .....       | .....      |
| fugu  | .....      | .....      | .....      | .....       | .....      |
| hosa  | KVPVLQVDSG | NYLFSTSAIC | RYFFLLSGWE | QDDL TNQWLE | WEATELQPAL |
| anga  | HLPILQLNSG | VQLFSTDVAA | KYLLPGDDAS | KVVQRDEWLE  | WSSKRLAPAL |
| drme  | .....      | .....      | .....      | .....       | .....      |

|       |            |            |            |            |            |
|-------|------------|------------|------------|------------|------------|
| sace  | LISFDKSKKH | PAHLQLANNL | KIALALEYAS | KNLKPEVDND | NAAMELRNTK |
| scpo  | KVQIPASFKT | ..SYSFAESL | KVSIAISAFS | VKVPCEGAAN | CNSVRLVNSK |
| didi  | .....      | .....      | .....      | .....      | .....      |
| arth  | .....      | .....      | .....      | .....      | .....      |
| orsa  | .....      | .....      | .....      | .....      | .....      |
| cael  | .....      | .....      | .....      | .....      | .....      |
| encu  | .....      | .....      | .....      | .....      | .....      |
| trde  | .....      | .....      | .....      | .....      | .....      |
| trpa  | .....      | .....      | .....      | .....      | .....      |
| bobu  | .....      | .....      | .....      | .....      | .....      |
| cacr  | .....      | .....      | .....      | .....      | .....      |
| suto  | .....      | .....      | .....      | .....      | .....      |
| suso  | .....      | .....      | .....      | .....      | .....      |
| aepe  | .....      | .....      | .....      | .....      | .....      |
| pyba  | .....      | .....      | .....      | .....      | .....      |
| pyho  | .....      | .....      | .....      | .....      | .....      |
| pyab  | .....      | .....      | .....      | .....      | .....      |
| pyfu  | .....      | .....      | .....      | .....      | .....      |
| meja  | .....      | .....      | .....      | .....      | .....      |
| meth  | .....      | .....      | .....      | .....      | .....      |
| arfu  | .....      | .....      | .....      | .....      | .....      |
| hanrc | .....      | .....      | .....      | .....      | .....      |
| psfl  | .....      | .....      | .....      | .....      | .....      |
| psae  | .....      | .....      | .....      | .....      | .....      |
| esco  | .....      | .....      | .....      | .....      | .....      |
| saty  | .....      | .....      | .....      | .....      | .....      |
| yepe  | .....      | .....      | .....      | .....      | .....      |
| vich  | .....      | .....      | .....      | .....      | .....      |
| haein | .....      | .....      | .....      | .....      | .....      |
| acac  | .....      | .....      | .....      | .....      | .....      |
| pamu  | .....      | .....      | .....      | .....      | .....      |
| neme  | .....      | .....      | .....      | .....      | .....      |
| nogo  | .....      | .....      | .....      | .....      | .....      |
| xyfa  | .....      | .....      | .....      | .....      | .....      |
| buAPS | .....      | .....      | .....      | .....      | .....      |
| sime  | .....      | .....      | .....      | .....      | .....      |
| agtu  | .....      | .....      | .....      | .....      | .....      |
| brsu  | .....      | .....      | .....      | .....      | .....      |
| melo  | .....      | .....      | .....      | .....      | .....      |
| rhpa  | .....      | .....      | .....      | .....      | .....      |
| mytu  | .....      | .....      | .....      | .....      | .....      |
| rhru  | .....      | .....      | .....      | .....      | .....      |
| noar  | .....      | .....      | .....      | .....      | .....      |
| rico  | .....      | .....      | .....      | .....      | .....      |
| ripr  | .....      | .....      | .....      | .....      | .....      |
| plyo  | .MLAAHIYKL | PVELSDDFFF | TRTFEVDKSL | IVNKKPLLIY | ENKFISSTNA |
| plfa  | CMLAAHIYNF | NVELSEDFLY | TRTFDIEKSL | IINKKPLLIY | ENNYVSSTKA |
| clpe1 | .....      | .....      | .....      | .....      | .....      |
| clac  | .....      | .....      | .....      | .....      | .....      |
| liin  | .....      | .....      | .....      | .....      | .....      |
| limo  | .....      | .....      | .....      | .....      | .....      |
| baan1 | .....      | .....      | .....      | .....      | .....      |

|           |       |            |            |            |            |
|-----------|-------|------------|------------|------------|------------|
| bacel     | ..... | .....      | .....      | .....      | .....      |
| basu      | ..... | .....      | .....      | .....      | .....      |
| bast      | ..... | .....      | .....      | .....      | .....      |
| baha      | ..... | .....      | .....      | .....      | .....      |
| enfa      | ..... | .....      | .....      | .....      | .....      |
| ocih      | ..... | .....      | .....      | .....      | .....      |
| stpy      | ..... | .....      | .....      | .....      | .....      |
| stpn      | ..... | .....      | .....      | .....      | .....      |
| stmu      | ..... | .....      | .....      | .....      | .....      |
| lala      | ..... | .....      | .....      | .....      | .....      |
| stau      | ..... | .....      | .....      | .....      | .....      |
| oeoe      | ..... | .....      | .....      | .....      | .....      |
| thma      | ..... | .....      | .....      | .....      | .....      |
| thth      | ..... | .....      | .....      | .....      | .....      |
| dera      | ..... | .....      | .....      | .....      | .....      |
| stco      | ..... | .....      | .....      | .....      | .....      |
| hepyj99   | ..... | .....      | .....      | .....      | .....      |
| hepy26695 | ..... | .....      | .....      | .....      | .....      |
| caje      | ..... | .....      | .....      | .....      | .....      |
| aqae      | ..... | .....      | .....      | .....      | .....      |
| funu      | ..... | .....      | .....      | .....      | .....      |
| trer      | ..... | .....      | .....      | .....      | .....      |
| sy6803    | ..... | .....      | .....      | .....      | .....      |
| arth_1    | ..... | .....      | .....      | .....      | .....      |
| prma      | ..... | .....      | .....      | .....      | .....      |
| caelmt    | ..... | .....      | .....      | .....      | .....      |
| hosamt    | ..... | .....      | .....      | .....      | .....      |
| tarumt    | ..... | .....      | .....      | .....      | .....      |
| drmemt    | ..... | .....      | .....      | .....      | .....      |
| anga2     | ..... | .....      | .....      | .....      | .....      |
| didimt    | ..... | .....      | .....      | .....      | .....      |
| caabmt    | ..... | .....      | .....      | .....      | .....      |
| sacemt    | ..... | .....      | .....      | .....      | .....      |
| scpomt    | ..... | .....      | .....      | .....      | .....      |
| lema      | ..... | MLKFFTEKAN | HQALKAVLCA | VFVQKPLEVT | LGSTYSTPYL |
| myge      | ..... | .....      | .....      | .....      | .....      |
| mypn      | ..... | .....      | .....      | .....      | .....      |
| urur      | ..... | .....      | .....      | .....      | .....      |
| mypu      | ..... | .....      | .....      | .....      | .....      |
|           | 101   |            |            |            | 150        |
| mask      | ..... | .....      | .....      | .....      | .....      |
| stpn2     | ..... | .....      | .....      | .....      | .....      |
| bace2     | ..... | .....      | .....      | .....      | .....      |
| baan2     | ..... | .....      | .....      | .....      | .....      |
| clpe2     | ..... | .....      | .....      | .....      | .....      |
| deet      | ..... | .....      | .....      | .....      | .....      |
| codi      | ..... | .....      | .....      | .....      | .....      |
| thnw      | ..... | .....      | .....      | .....      | .....      |
| thvo      | ..... | .....      | .....      | .....      | .....      |
| pogi      | ..... | .....      | .....      | .....      | .....      |
| bafr      | ..... | .....      | .....      | .....      | .....      |

|       |            |             |            |            |            |
|-------|------------|-------------|------------|------------|------------|
| cyhu  | .....      | .....       | .....      | .....      | .....      |
| chte  | .....      | .....       | .....      | .....      | .....      |
| chmu  | .....      | .....       | .....      | .....      | .....      |
| chtr  | .....      | .....       | .....      | .....      | .....      |
| chpn  | .....      | .....       | .....      | .....      | .....      |
| fugu  | .....      | .....       | .....      | .....      | .....      |
| hosa  | SAPLYYLVVQ | GKKGEDVLGS  | VRRALTHIDH | SLSRQNCNFL | AGETESLADI |
| anga  | THNMAVGSRA | DPNTKPILNT  | LVKMLDDCLS | .....NSTFL | TGDKISSADV |
| drme  | .....      | .....       | .....      | .....      | .....      |
| sace  | EP.....    | .....FLLFDA | N.....     | .....      | ...AILRYVM |
| scpo  | EPEKYVSDAN | AIVSFLYWKQ  | EEDLFNSFIS | .....SKLSI | LDWEALQFTP |
| didi  | .....      | .....       | .....      | .....      | .....      |
| arth  | .....      | .....       | .....      | .....      | .....      |
| orsa  | .....      | .....       | .....      | .....      | .....      |
| cael  | .....      | .....       | .....      | .....      | .....      |
| encu  | .....      | .....       | .....      | .....      | .....      |
| trde  | .....      | .....       | .....      | .....      | .....      |
| trpa  | .....      | .....       | .....      | .....      | .....      |
| bobu  | .....      | .....       | .....      | .....      | .....      |
| cacr  | .....      | .....       | .....      | .....      | .....      |
| suto  | .....      | .....       | .....      | .....      | .....      |
| suso  | .....      | .....       | .....      | .....      | .....      |
| aepe  | .....      | .....       | .....      | .....      | .....      |
| pyba  | .....      | .....       | .....      | .....      | .....      |
| pyho  | .....      | .....       | .....      | .....      | .....      |
| pyab  | .....      | .....       | .....      | .....      | .....      |
| pyfu  | .....      | .....       | .....      | .....      | .....      |
| meja  | .....      | .....       | .....      | .....      | .....      |
| meth  | .....      | .....       | .....      | .....      | .....      |
| arfu  | .....      | .....       | .....      | .....      | .....      |
| hanrc | .....      | .....       | .....      | .....      | .....      |
| psfl  | .....      | .....       | .....      | .....      | .....      |
| psae  | .....      | .....       | .....      | .....      | .....      |
| esco  | .....      | .....       | .....      | .....      | .....      |
| saty  | .....      | .....       | .....      | .....      | .....      |
| yepe  | .....      | .....       | .....      | .....      | .....      |
| vich  | .....      | .....       | .....      | .....      | .....      |
| haein | .....      | .....       | .....      | .....      | .....      |
| acac  | .....      | .....       | .....      | .....      | .....      |
| pamu  | .....      | .....       | .....      | .....      | .....      |
| neme  | .....      | .....       | .....      | .....      | .....      |
| nogo  | .....      | .....       | .....      | .....      | .....      |
| xyfa  | .....      | .....       | .....      | .....      | .....      |
| buAPS | .....      | .....       | .....      | .....      | .....      |
| sime  | .....      | .....       | .....      | .....      | .....      |
| agtu  | .....      | .....       | .....      | .....      | .....      |
| brsu  | .....      | .....       | .....      | .....      | .....      |
| melo  | .....      | .....       | .....      | .....      | .....      |
| rhpa  | .....      | .....       | .....      | .....      | .....      |
| mytu  | .....      | .....       | .....      | .....      | .....      |
| rhru  | .....      | .....       | .....      | .....      | .....      |
| noar  | .....      | .....       | .....      | .....      | .....      |



|           |            |            |            |            |            |
|-----------|------------|------------|------------|------------|------------|
| rico      | .....      | .....      | .....      | .....      | .....      |
| ripr      | .....      | .....      | .....      | .....      | .....      |
| plyo      | ICFLFHRLKN | KGINTKGLDD | KLRLYLTWIE | WSDILEKNIE | RLNKKKIIES |
| plfa      | ICFLFHRLRN | K..SKKPFDE | NLSYYLGWLE | WSDLLEKHIE | VLNKKNIIES |
| clpel     | .....      | .....      | .....      | .....      | .....      |
| clac      | .....      | .....      | .....      | .....      | .....      |
| liin      | .....      | .....      | .....      | .....      | .....      |
| limo      | .....      | .....      | .....      | .....      | .....      |
| baan1     | .....      | .....      | .....      | .....      | .....      |
| bacel     | .....      | .....      | .....      | .....      | .....      |
| basu      | .....      | .....      | .....      | .....      | .....      |
| bast      | .....      | .....      | .....      | .....      | .....      |
| baha      | .....      | .....      | .....      | .....      | .....      |
| enfa      | .....      | .....      | .....      | .....      | .....      |
| ocih      | .....      | .....      | .....      | .....      | .....      |
| stpy      | .....      | .....      | .....      | .....      | .....      |
| stpn      | .....      | .....      | .....      | .....      | .....      |
| stmu      | .....      | .....      | .....      | .....      | .....      |
| lala      | .....      | .....      | .....      | .....      | .....      |
| stau      | .....      | .....      | .....      | .....      | .....      |
| oeoe      | .....      | .....      | .....      | .....      | .....      |
| thma      | .....      | .....      | .....      | .....      | .....      |
| thth      | .....      | .....      | .....      | .....      | .....      |
| dera      | .....      | .....      | .....      | .....      | .....      |
| stco      | .....      | .....      | .....      | .....      | .....      |
| hepyj99   | .....      | .....      | .....      | .....      | .....      |
| hepy26695 | .....      | .....      | .....      | .....      | .....      |
| caje      | .....      | .....      | .....      | .....      | .....      |
| aqae      | .....      | .....      | .....      | .....      | .....      |
| funu      | .....      | .....      | .....      | .....      | .....      |
| trer      | .....      | .....      | .....      | .....      | .....      |
| sy6803    | .....      | .....      | .....      | .....      | .....      |
| arth_1    | .....      | .....      | .....      | .....      | .....      |
| prma      | .....      | .....      | .....      | .....      | .....      |
| caelmt    | .....      | .....      | .....      | .....MESLL | VTGTNYGIGE |
| hosamt    | .....      | .....      | .....      | .....      | .....      |
| tarunt    | .....      | .....      | .....      | .....      | .....      |
| drmemt    | .....      | .....      | .....      | .....      | .....      |
| anga2     | .....      | .....      | .....      | .....      | .....      |
| didimt    | .....      | .....      | .....      | .....      | .....      |
| caabmt    | .....      | .....      | .....      | .....      | .....      |
| sacemt    | .....      | .....      | .....      | .....      | .....      |
| scpomt    | .....      | .....      | .....      | .....      | .....      |
| lema      | QLPKSRALLY | SCNEAARLIW | STHAAPLPAD | NSLEGEAEWL | EWESTVLTPA |
| myge      | .....      | .....      | .....      | .....      | .....      |
| mypn      | .....      | .....      | .....      | .....      | .....      |
| urur      | .....      | .....      | .....      | .....      | .....      |
| mypu      | .....      | .....      | .....      | .....      | .....      |
|           | 151        |            |            |            | 200        |
| mask      | .....      | .....      | .....      | .....      | .....      |
| stpn2     | .....      | .....      | .....      | .....      | .....      |

|       |             |            |            |            |             |
|-------|-------------|------------|------------|------------|-------------|
| bace2 | .....       | .....      | .....      | .....      | .....       |
| baan2 | .....       | .....      | .....      | .....      | .....       |
| clpe2 | .....       | .....      | .....      | .....      | .....       |
| deet  | .....       | .....      | .....      | .....      | .....       |
| codi  | .....       | .....      | .....      | .....      | .....       |
| thnw  | .....       | .....      | .....      | .....      | .....       |
| thvo  | .....       | .....      | .....      | .....      | .....       |
| pogi  | .....       | .....      | .....      | .....      | .....       |
| bafr  | .....       | .....      | .....      | .....      | .....       |
| cyhu  | .....       | .....      | .....      | .....      | .....       |
| chte  | .....       | .....      | .....      | .....      | .....       |
| chmu  | .....       | .....      | .....      | .....      | .....       |
| chtr  | .....       | .....      | .....      | .....      | .....       |
| chpn  | .....       | .....      | .....      | .....      | .....       |
| fugu  | .....       | .....      | .....      | .....      | .....       |
| hosa  | VLWGAQYP..  | .....LLQDP | AYLPEELSAL | HSWFQTLSTQ | EPCQRAAETV  |
| anga  | AVWSLLAPDG  | TLKGAVNIDN | VLRWYRQITA | LPEVQSALAA | LPLKELSFAS  |
| drme  | .....       | .....      | .....      | .....      | .....       |
| sace  | DDFEGQTS DK | YQFALASLQN | LLYHKELPQQ | HVEVLTNKAI | ENYLVVELKEP |
| scpo  | KAYTAKTKED  | FAYLLSQLET | IFKENEILNE | FTPVEVALAS | DIYFCVLNGA  |
| didi  | .....       | .....      | .....      | .....      | .....       |
| arth  | .....       | .....      | .....      | .....      | .....       |
| orsa  | .....       | .....      | .....      | .....      | .....       |
| cael  | .....       | .....      | .....      | .....      | .....       |
| encu  | .....       | .....      | .....      | .....      | .....       |
| trde  | .....       | .....      | .....      | .....      | .....       |
| trpa  | .....       | .....      | .....      | .....      | .....       |
| bobu  | .....       | .....      | .....      | .....      | .....       |
| cacr  | .....       | .....      | .....      | .....      | .....       |
| suto  | .....       | .....      | .....      | .....      | .....       |
| suso  | .....       | .....      | .....      | .....      | .....       |
| aepe  | .....       | .....      | .....      | .....      | .....       |
| pyba  | .....       | .....      | .....      | .....      | .....       |
| pyho  | .....       | .....      | .....      | .....      | .....       |
| pyab  | .....       | .....      | .....      | .....      | .....       |
| pyfu  | .....       | .....      | .....      | .....      | .....       |
| meja  | .....       | .....      | .....      | .....      | .....       |
| meth  | .....       | .....      | .....      | .....      | .....       |
| arfu  | .....       | .....      | .....      | .....      | .....       |
| hanrc | .....       | .....      | .....      | .....      | .....       |
| psfl  | .....       | .....      | .....      | .....      | .....       |
| psae  | .....       | .....      | .....      | .....      | .....       |
| esco  | .....       | .....      | .....      | .....      | .....       |
| saty  | .....       | .....      | .....      | .....      | .....       |
| yepe  | .....       | .....      | .....      | .....      | .....       |
| vich  | .....       | .....      | .....      | .....      | .....       |
| haein | .....       | .....      | .....      | .....      | .....       |
| acac  | .....       | .....      | .....      | .....      | .....       |
| pamu  | .....       | .....      | .....      | .....      | .....       |
| neme  | .....       | .....      | .....      | .....      | .....       |
| nogo  | .....       | .....      | .....      | .....      | .....       |
| xyfa  | .....       | .....      | .....      | .....      | .....       |

|           |            |            |            |            |            |
|-----------|------------|------------|------------|------------|------------|
| buAPS     | .....      | .....      | .....      | .....      | .....      |
| sime      | .....      | .....      | .....      | .....      | .....      |
| agtu      | .....      | .....      | .....      | .....      | .....      |
| brsu      | .....      | .....      | .....      | .....      | .....      |
| melo      | .....      | .....      | .....      | .....      | .....      |
| rhpa      | .....      | .....      | .....      | .....      | .....      |
| mytu      | .....      | .....      | .....      | .....      | .....      |
| rhru      | .....      | .....      | .....      | .....      | .....      |
| noar      | .....      | .....      | .....      | .....      | .....      |
| rico      | .....      | .....      | .....      | .....      | .....      |
| ripr      | .....      | .....      | .....      | .....      | .....      |
| plyo      | LDLLESYLSE | NKNKKFICDE | VDQIKREDEC | SETDQNQKND | ICGITLADIY |
| plfa      | LDELELYLKE | NKNK...NK  | .NFINN.DD. | .EKDENK... | ...LSLADIF |
| clpel     | .....      | .....      | .....      | .....      | .....      |
| clac      | .....      | .....      | .....      | .....      | .....      |
| liin      | .....      | .....      | .....      | .....      | .....      |
| limo      | .....      | .....      | .....      | .....      | .....      |
| baan1     | .....      | .....      | .....      | .....      | .....      |
| bacel     | .....      | .....      | .....      | .....      | .....      |
| basu      | .....      | .....      | .....      | .....      | .....      |
| bast      | .....      | .....      | .....      | .....      | .....      |
| baha      | .....      | .....      | .....      | .....      | .....      |
| enfa      | .....      | .....      | .....      | .....      | .....      |
| ocih      | .....      | .....      | .....      | .....      | .....      |
| stpy      | .....      | .....      | .....      | .....      | .....      |
| stpn      | .....      | .....      | .....      | .....      | .....      |
| stmu      | .....      | .....      | .....      | .....      | .....      |
| lala      | .....      | .....      | .....      | .....      | .....      |
| stau      | .....      | .....      | .....      | .....      | .....      |
| oeoe      | .....      | .....      | .....      | .....      | .....      |
| thma      | .....      | .....      | .....      | .....      | .....      |
| thth      | .....      | .....      | .....      | .....      | .....      |
| dera      | .....      | .....      | .....      | .....      | .....      |
| stco      | .....      | .....      | .....      | .....      | .....      |
| hepyj99   | .....      | .....      | .....      | .....      | .....      |
| hepy26695 | .....      | .....      | .....      | .....      | .....      |
| caje      | .....      | .....      | .....      | .....      | .....      |
| aqae      | .....      | .....      | .....      | .....      | .....      |
| funu      | .....      | .....      | .....      | .....      | .....      |
| trer      | .....      | .....      | .....      | .....      | .....      |
| sy6803    | .....      | .....      | .....      | .....      | .....      |
| arth_1    | .....      | .....      | .....      | .....      | .....      |
| prma      | .....      | .....      | .....      | .....      | .....      |
| caelmt    | LFIKYPLPLS | SACHFQVLKK | HWIQMTQQE  | HMGYPGWFR  | GSQRLPFIGF |
| hosamt    | .....      | .....      | ..MLRTSVLR | LLGR...T.  | GASRLSLL.. |
| tarumt    | .....      | .....      | ..MRTRFLF  | LTSG...CK  | AVPELHKIVL |
| drmemt    | .....      | .....      | ..MLIRRIK  | CL.....    | .....R...  |
| anga2     | .....      | .....      | ..MVTRWIF  | SR.....    | .....R...  |
| didimt    | .....      | .....      | .....      | .....      | .....      |
| caabmt    | .....      | .....      | ..MRFKIRG  | .....      | .....      |
| sacemt    | .....      | .....      | ...MQCR.   | .....      | .....      |
| scpomt    | .....      | .....      | ..MLRKGIC  | .....      | .....      |

|       |            |            |            |            |            |
|-------|------------|------------|------------|------------|------------|
| lema  | LTPLYTHRRI | TGEAEAALKK | LDSTIEEHQG | TVAVKGAPSS | TSFLVDSVLF |
| myge  | .....      | .....      | .....      | .....      | .....      |
| mypn  | .....      | .....      | .....      | .....      | .....      |
| urur  | .....      | .....      | .....      | .....      | .....      |
| mypu  | .....      | .....      | .....      | .....      | .....      |
|       | 201        |            |            |            | 250        |
| mask  | .....      | .....      | .....      | .....      | .....      |
| stpn2 | .....      | .....      | .....      | .....      | .....      |
| bace2 | .....      | .....      | .....      | .....      | .....      |
| baan2 | .....      | .....      | .....      | .....      | .....      |
| clpe2 | .....      | .....      | .....      | .....      | .....      |
| deet  | .....      | .....      | .....      | .....      | .....      |
| codi  | .....      | .....      | .....      | .....      | .....      |
| thnw  | .....      | .....      | .....      | .....      | .....      |
| thvo  | .....      | .....      | .....      | .....      | .....      |
| pogi  | .....      | .....      | .....      | .....      | .....      |
| bafr  | .....      | .....      | .....      | .....      | .....      |
| cyhu  | .....      | .....      | .....      | .....      | .....      |
| chte  | .....      | .....      | .....      | .....      | .....      |
| chmu  | .....      | .....      | .....      | .....      | .....      |
| chtr  | .....      | .....      | .....      | .....      | .....      |
| chpn  | .....      | .....      | .....      | .....      | .....      |
| fugu  | .....      | .....      | .....      | .....      | .....      |
| hosa  | LKQQGVLALR | PYLQKQPQPS | PAEGRAVTNE | PEEEELATLS | EEEIAMAVTA |
| anga  | LQHSNRFGGL | HHIVLNPEIA | DFEG.ELLAD | TSANIAETVQ | REEIEAARAA |
| drme  | .....      | .....      | .....      | .....      | ..EISAAKAA |
| sace  | LTATDLILFA | NVYALN..SS | LVHSKFPELP | SKVHNAVALA | KKHVPRDSSS |
| scpo  | PVREYPLLSA | WYLKIEKQKP | FVQALKLTFE | KTLGQPAVTS | TEKIP.VSET |
| didi  | .....      | .....      | .....      | .....      | .....      |
| arth  | .....      | .....      | .....      | .....      | .....      |
| orsa  | .....      | .....      | .....      | .....      | .....      |
| cael  | .....      | .....      | .....      | .....M     | GHDLADIKKS |
| encu  | .....      | .....      | .....      | .....      | .....      |
| trde  | .....      | .....      | .....      | .....      | .....      |
| trpa  | .....      | .....      | .....      | .....      | .....      |
| bobu  | .....      | .....      | .....      | .....      | .....      |
| cacr  | .....      | .....      | .....      | .....      | .....      |
| suto  | .....      | .....      | .....      | .....      | .....      |
| suso  | .....      | .....      | .....      | .....      | .....      |
| aepe  | .....      | .....      | .....      | .....      | .....      |
| pyba  | .....      | .....      | .....      | .....      | .....      |
| pyho  | .....      | .....      | .....      | .....      | .....      |
| pyab  | .....      | .....      | .....      | .....      | .....      |
| pyfu  | .....      | .....      | .....      | .....      | .....      |
| meja  | .....      | .....      | .....      | .....      | .....      |
| meth  | .....      | .....      | .....      | .....      | .....      |
| arfu  | .....      | .....      | .....      | .....      | .....      |
| hanrc | .....      | .....      | .....      | .....      | .....      |
| psfl  | .....      | .....      | .....      | .....      | .....      |
| psae  | .....      | .....      | .....      | .....      | .....      |
| esco  | .....      | .....      | .....      | .....      | .....      |

|           |            |            |            |            |             |
|-----------|------------|------------|------------|------------|-------------|
| saty      | .....      | .....      | .....      | .....      | .....       |
| yepe      | .....      | .....      | .....      | .....      | .....       |
| vich      | .....      | .....      | .....MLP   | PLKEQLNPEK | DRGINCCAPW  |
| haein     | .....      | .....      | .....      | .....      | .....       |
| acac      | .....      | .....      | .....      | .....      | .....       |
| pamu      | .....      | .....      | .....      | .....      | .....       |
| neme      | .....      | .....      | .....      | .....      | .....       |
| nogo      | .....      | .....      | .....      | .....      | .....       |
| xyfa      | .....      | .....      | .....      | .....      | .....       |
| buAPS     | .....      | .....      | .....      | .....      | .....       |
| sime      | .....      | .....      | .....      | .....      | .....       |
| agtu      | .....      | .....      | .....      | .....      | .....       |
| brsu      | .....      | .....      | .....      | .....      | .....       |
| melo      | .....      | .....      | .....      | .....      | .....       |
| rhpa      | .....      | .....      | .....      | .....      | .....       |
| mytu      | .....      | .....      | .....      | .....      | .....       |
| rhru      | .....      | .....      | .....      | .....      | .....       |
| noar      | .....      | .....      | .....      | .....      | .....       |
| rico      | .....      | .....      | .....      | .....      | .....       |
| ripr      | .....      | .....      | .....      | .....      | .....       |
| plyo      | VYTSLKYSNI | VICNESWSHI | NNYIERIHNL | EDVQKVVETV | EKVHKLKNIY  |
| plfa      | VYTSLKHSCI | EICKESWVHI | NEYIEKINNL | QEIQNVIKNV | EELIYKYKNIY |
| clpel     | .....      | .....      | .....      | .....      | .....       |
| clac      | .....      | .....      | .....      | .....      | .....       |
| liin      | .....      | .....      | .....      | .....      | .....       |
| limo      | .....      | .....      | .....      | .....      | .....       |
| baan1     | .....      | .....      | .....      | .....      | .....       |
| bacel     | .....      | .....      | .....      | .....      | .....       |
| basu      | .....      | .....      | .....      | .....      | .....       |
| bast      | .....      | .....      | .....      | .....      | .....       |
| baha      | .....      | .....      | .....      | .....      | .....       |
| enfa      | .....      | .....      | .....      | .....      | .....       |
| ocih      | .....      | .....      | .....      | .....      | .....       |
| stpy      | .....      | .....      | .....      | .....      | .....       |
| stpn      | .....      | .....      | .....      | .....      | .....       |
| stmu      | .....      | .....      | .....      | .....      | .....       |
| lala      | .....      | .....      | .....      | .....      | .....       |
| stau      | .....      | .....      | .....      | .....      | .....       |
| oeoe      | .....      | .....      | .....      | .....      | .....       |
| thma      | .....      | .....      | .....      | .....      | .....       |
| thth      | .....      | .....      | .....      | .....      | .....       |
| dera      | .....      | .....      | .....      | .....      | .....       |
| stco      | .....      | .....      | .....      | .....      | .....       |
| hepyj99   | .....      | .....      | .....      | .....      | .....       |
| hepy26695 | .....      | .....      | .....      | .....      | .....       |
| caje      | .....      | .....      | .....      | .....      | .....       |
| aqae      | .....      | .....      | .....      | .....      | .....       |
| funu      | .....      | .....      | .....      | .....      | .....       |
| trer      | .....      | .....      | .....      | .....      | .....       |
| sy6803    | .....      | .....      | .....      | .....      | .....       |
| arth_1    | .....      | MAARINTSLH | NALSFLKPFN | TPLNTPKPSF | RRNSFRFSKK  |
| prma      | .....      | .....      | .....      | .....      | .....       |

|        |            |            |            |            |            |
|--------|------------|------------|------------|------------|------------|
| caelmt | RAGSGGTVQL | RTRPFPCSGT | PPPVLGPAVT | MLRQCARWVL | TRTRFGRGCR |
| hosamt | .....      | .....      | .....      | .....      | ..EDFGP..R |
| tarumt | .....      | .....      | .....      | .....      | ..ANAAP... |
| drmemt | .....      | .....      | .....      | .....      | .....      |
| anga2  | .....      | .....      | .....      | .....      | .....      |
| didimt | .....      | .....      | .....      | .....      | .....      |
| caabmt | .....      | .....      | .....      | .....      | .....      |
| sacemt | .....      | .....      | .....      | .....      | .....      |
| scpomt | .....      | .....      | .....      | .....      | .....      |
| lema   | ASLLPALCEG | GLLPAAQAAR | VPHLVKWFQA | FQAEHAELIA | SAFDVLSVQE |
| myge   | .....      | .....      | .....      | .....      | .....      |
| mypn   | .....      | .....      | .....      | .....      | .....      |
| urur   | .....      | .....      | .....      | .....      | .....      |
| mypu   | .....      | .....      | .....      | .....      | .....      |

251

300

|       |            |             |             |            |            |
|-------|------------|-------------|-------------|------------|------------|
| mask  | .....      | .....       | .....       | ..*****    | *****      |
| stpn2 | .....      | .....       | .....MS     | IFIGGAWPYA | NGSLHIGHAA |
| bace2 | .....      | .....       | .....MS     | IFIGGAWPYA | NGSLHLGHIA |
| baan2 | .....      | .....       | .....MS     | IFIGGAWPYA | NGSLHLGHIA |
| clpe2 | .....      | .....       | .....MK     | VIIGNAWPYA | NGSLHIGRVS |
| deet  | .....      | .....       | .....       | IFIGVAWPYA | NSQLHLGHVA |
| codi  | .....      | .....       | .....MNNR   | VLVSVAWPYA | NGPRHIGHVA |
| thnw  | .....      | .....       | .....MVQIK  | ILVNCALPYA | NGPLHIGHIA |
| thvo  | .....      | .....       | .....MIGIK  | ILVNCALPYA | NGPLHVGHIA |
| pogi  | .....      | .....       | ...MDRQFKR  | TLITTALPYA | NGPVHIGHLA |
| bafr  | .....      | .....       | ...MEKNFKR  | TTVTSALPYA | NGPVHIGHLA |
| cyhu  | .....      | .....       | ...MTNKPSR  | YTITSALPYA | NGPVHIGHLA |
| chte  | .....      | .....       | VLPMTHIPKR  | TLVTTALPYA | NGPVHLGHIA |
| chmu  | .....      | .....       | .....MASSR  | ILITSALPYA | NGPLHFGHIT |
| chtr  | .....      | .....       | .....MESSR  | ILITSALPYA | NGPLHFGHIT |
| chpn  | .....      | .....       | .....MPQK   | VLITSALPYA | NGPLHFGHIA |
| fugu  | .....      | .....       | ...LPQEDKKN | FLVTSALPYV | NNVPHLGNII |
| hosa  | WEKGLS...  | ..LPPLRPQON | PVLPVAGERN  | VLITSALPYV | NNVPHLGNII |
| anga  | FGETDD...  | ..RAVRDEPR  | IVLPKPGQKN  | NLITSALPYV | NNVPHLGNIV |
| drme  | FTYTAP...  | ..KEIKEE.R  | TVLPKPGERN  | VLITSALPYV | NNVPHLGNII |
| sace  | FKNIGAVKIQ | ADLTVKPKDS  | EILPKPNERN  | ILITSALPYV | NNVPHLGNII |
| scpo  | TRNVNSQHLM | RERVPGEK..  | ..ILPKSNERN | ILITSALPYV | NNVPHLGNIV |
| didi  | .....      | .....       | .....N      | ILITSAFPYV | NNVPHLGNII |
| arth  | .MEDDG...  | .....KSSP.  | .KLPIPGKRN  | ILITSALPYV | NNVPHLGNII |
| orsa  | .MASPP...  | .....PPPPP  | PKLPVPGRRN  | ILVTSALPYV | NNVPHLGNII |
| cael  | FEASLPG... | ..YVEKKDPK  | SILPQPGKRN  | ILITAALPYV | NNVPHLGNII |
| encu  | .....      | .....       | .....MK     | KFITSALPYV | NNQPHLGNII |
| trde  | .....      | .....       | .....       | ..VTSALPYV | NNFPHLGNLI |
| trpa  | .....      | .....       | .....MTR    | KLITAALPYV | NNVPHLGNLI |
| bobu  | .....      | .....       | .....MKKM   | NLVTAALPYV | NNIPLHGNLV |
| cacr  | .....      | .....       | .....MAR    | ILITSALPYI | NGIKHLGNLA |
| suto  | .....      | .....       | .....MK     | IFVASAWPYV | NAVPHLGNLI |
| suso  | .....      | .....       | .....MK     | VLVTAAPYV  | NSVPHLGNLI |
| aepe  | .....      | .....       | .....MAK    | YVVTSAWPYV | NHVPHLGTLI |
| pyba  | .....      | .....       | .....MAK    | YVIGSAWPYV | QTVPHLGNMI |
| pyho  | .....      | .....       | .....MVR    | YMVTSALPYA | NGPIHAGHLA |

|       |            |            |            |            |             |            |            |
|-------|------------|------------|------------|------------|-------------|------------|------------|
| pyab  | .....      | .....      | .....      | MVR        | YMVTSALPYA  | NGPIHAGHLA |            |
| pyfu  | .....      | .....      | .....      | MVR        | YMVTAALPYA  | NGPIHAGHLA |            |
| meja  | .....      | .....      | .....      | MR         | YLITTALAYT  | NGPLHLGHAR |            |
| meth  | .....      | .....      | .....      | MSK        | VFITCALPYA  | NGPThLGHlR |            |
| arfu  | .....      | .....      | .....      | M          | KLVTCGLPYA  | NGKAHVGHlR |            |
| hanrc | .....      | .....      | M          | TDEDYPTDDP | AVVTCGLPYP  | TGDLHIGHlR |            |
| psfl  | .....      | .....      | .....      | VKPHMSEPRK | ILVTSALPYA  | NGSIHLGHML |            |
| psae  | .....      | .....      | .....      | .....      | ILVTSALPYA  | NGSIHLGHML |            |
| esco  | .....      | .....      | .....      | MPTMTQVAKK | ILVTCALPYA  | NGSIHLGHML |            |
| saty  | .....      | .....      | .....      | .....      | ILVTCALPYA  | NGSIHLGHML |            |
| yepe  | .....      | .....      | .....      | MAQVAKK    | ILVTCALPYA  | NGSIHLGHML |            |
| vich  | RDCVLRVVLs | LQFGLYQEKR | ILSMANDPRK | LLVTCALPYA | NGSIHLGHML  |            |            |
| haein | .....      | .....      | .....      | MTTQPRK    | ILVTCALPYA  | NGAIHLGHML |            |
| acac  | .....      | .....      | .....      | MSNNKRK    | ILVTCALPYA  | NGPIHLGHML |            |
| pamu  | .....      | .....      | .....      | MANSARD    | ILVTCALPYA  | NGAIHLGHLL |            |
| neme  | .....      | .....      | .....      | MTRK       | ILVTSALPYA  | NGSIHLGHMV |            |
| nogo  | .....      | .....      | .....      | .....      | ILVTSALPYA  | NGSIHLGHMV |            |
| xyfa  | .....      | MPYSH      | PLVPLSFMTT | ALVTTALPYA | NGPLHLGHlV  |            |            |
| buAPS | .....      | .....      | .....      | MSSVFRK    | ILVTCALPYA  | NGSIHIGHML |            |
| sime  | .....      | MRDTS      | .....      | P          | FYITTAISYP  | NGKPHIGHAY |            |
| agtu  | .....      | MTDKT      | .....      | P          | FYITTAISYP  | NGKPHIGHAY |            |
| brsu  | .....      | MSRE       | .....      | K          | YYITTAIAYP  | NGKPHIGHAY |            |
| melo  | .....      | MSRE       | .....      | K          | YYLTTPIFYYP | NGKPHIGHAY |            |
| rhpa  | .....      | MAQRN      | .....      | S          | FYITTAIAYP  | NGAPHIGHAY |            |
| mytu  | .....      | MK         | .....      | P          | YYVTTAIAYP  | NAAPHVGHAY |            |
| rhru  | .....      | MAGPKP     | .....      | P          | FYLTTPIYYV  | NDKPHIGHAY |            |
| noar  | .....      | MGE        | .....      | P          | FYITTAISYP  | NGKPHIGHAY |            |
| rico  | .....      | MNN        | .....      | T          | YYITTPiYYV  | NDIPHIGHAY |            |
| ripr  | .....      | MKN        | .....      | T          | YYITTPiYYV  | NDVAHIGHAY |            |
| plyo  | SLFISKVCEK | NINDHVKNd  | .....      | N          | FYITTAISYV  | NGEPHIGHAY |            |
| plfa  | SVFISKIHDK | NVNEYLKNE  | .....      | T          | FYITTAiNYV  | NGDPHIGHAY |            |
| clpel | .....      | MCKK       | .....      | P          | YYITTPiYYP  | STNLHIGNTY |            |
| clac  | .....      | MSEKK      | .....      | K          | FYITTPiYYP  | SAKLHIGNTY |            |
| liin  | .....      | MPEEKN     | .....      | T          | FYITTPiYYP  | SGKAHIGHAY |            |
| limo  | .....      | MPEEKN     | .....      | T          | FYITTPiYYP  | SGKAHIGHAY |            |
| baanl | .....      | MRLFGR     | FKTMTEENK  | .....      | S           | FYITTPiYYP | SGKLHIGHAY |
| bacel | .....      | R          | SKTMTKENK  | .....      | S           | FYITTPiYYP | SGKLHIGHAY |
| basu  | .....      | .....      | MPQENN     | .....      | T           | FYITTPiYYP | SGKLHIGHAY |
| bast  | .....      | .....      | MEKK       | .....      | T           | FYLTTPIYYP | SDKLHIGHAY |
| baha  | .....      | .....      | MSKEQK     | .....      | T           | FYLTTPIYYP | SDKLHIGHAY |
| enfa  | .....      | MTKG       | GFFCMSQKE  | .....      | T           | FYITTPiYYP | SGKLHIGNSY |
| ocih  | .....      | .....      | MARE       | .....      | NA          | FYITTPiYYP | SGKLHIGNAY |
| stpy  | .....      | .....      | MMKK       | .....      | P           | FYITTPiYYP | SGKLHIGSAY |
| stpn  | .....      | VLEKQVSFA  | WKGKIMSEK  | .....      | N           | FYITTPiYYP | SGKLHIGSAY |
| stmu  | .....      | .....      | MTEKQ      | .....      | P           | FYITTPiYYP | SGKLHIGSAY |
| lala  | .....      | .....      | MTENK      | .....      | T           | FYITTPiYYP | SGKLHLGSSY |
| stau  | .....      | .....      | MAKE       | .....      | T           | FYITTPiYYP | SGNLHIGHAY |
| oeoe  | .....      | .....      | MTKKN      | .....      | R           | FYITTPiYYP | SGKLQLGNTY |
| thma  | .....      | .....      | M          | .....      | K           | FYITTPiYYV | NSEPHIGSAY |
| thth  | .....      | .....      | MEK        | .....      | V           | FYVTTPIYYV | NAEPHLGHAY |
| dera  | .....      | MQNPPQHPE  | AQSPETRDR  | .....      | E           | FFITAAIDYA | NGTPHIGHVY |
| stco  | .....      | MAA        | TGTEKQGAK  | .....      | A           | YYVSTPIYYV | NDAPHLGHAY |

|           |            |             |            |         |             |            |
|-----------|------------|-------------|------------|---------|-------------|------------|
| hepyj99   | .....      | .....MQ.    | .....      | .....K  | SLITTTPIYYV | NDIPHIGHAY |
| hepy26695 | .....      | .....MQ.    | .....      | .....K  | SLITTTPIYYV | NDIPHIGHAY |
| caje      | .....      | .....       | .....      | .....M  | RYITTTPIYYV | NDVPHLGHAY |
| aqae      | .....      | .....MTLMK. | .....      | .....K  | FYVTTPIYYV  | NDVPHLGHAY |
| funu      | .....      | .....MKK.   | .....      | .....N  | FFVSTPIYYV  | NGDPHVGSAY |
| trrer     | .....      | MKNMYTDKN.  | .....      | .....T  | FAITTTPLYV  | NDLPHIGSAY |
| sy6803    | .....      | ..MLDSSVP.  | .....      | .....T  | FSVTTPLYV   | NDVPHLGSAY |
| arth_1    | LPYYSQFSSG | KRALYCTSSS  | QESTVDEGET |         | FVLTTPLYV   | NAPPHMGSA  |
| prma      | .....      | .....       | .....      | .....MS | FVITTTPLYV  | NDKPHLGSY  |
| caelmt    | RYGSCSPSAS | GDAG..EAR.  | .....      | .....   | AYFTTPIFYV  | NAAPHIGHLY |
| hosamt    | YYSSGSLSAG | DDAC..DVR.  | .....      | .....   | AYFTTPIFYV  | NAAPHIGHLY |
| tarumt    | ...VKNPEIR | YAST..ENR.  | .....      | .....N  | YYITTTPIFYV | NASPHLGHLY |
| drmemt    | ....YLGTR  | YNSS.....   | .....      | .....   | HYVTTPIFYV  | NAAPHIGHLY |
| anga2     | ....FSSQI  | QHS.....    | .....      | .....   | .FVTTPIFYV  | NAAPHIGHLY |
| didimt    | .....      | .....       | .....      | .....   | ..ITTTPIFYV | NGPPHIGHLY |
| caabmt    | ....PLIQLR | YKST....K.  | .....      | .....A  | FYITTTPIFYV | NAAPHIGHLY |
| sacemt    | ....SIVHRL | YS.....K.   | .....      | .....V  | SHVTTPIFYV  | NAKPHLGHLY |
| scpomt    | ....RLIHQV | SESS..K.K.  | .....      | .....P  | YFLTTPIFYV  | NAAPHLGHLY |
| lema      | CGDFLRVPQT | YEVSPKKQK.  | .....      | .....V  | FFATTPIYYV  | NASPHIGHVY |
| myge      | .....      | .....MK.    | .....      | .....R  | CYITTTPIYYA | SGKPHIGHAF |
| mypn      | .....      | .....MK.    | .....      | .....R  | CYITTTPIYYA | SGKPHIGHAF |
| urur      | .....      | ....MLKQK.  | .....      | .....K  | FFISTPIYYV  | SGNPHIGHAY |
| mypu      | .....      | .....MKK.   | .....      | .....T  | IYITTTPIYYP | SGDLHLGHIY |

301

350

|       |            |             |            |            |       |             |
|-------|------------|-------------|------------|------------|-------|-------------|
| mask  | .*****     | *.*****.    | .....      | *****      | ***** | *****.      |
| stpn2 | .ALLPGDILA | R.YYRQKGEE  | ....VLYVSG | SDCNGTPI   | SI    | RAKKENK.SV  |
| bace2 | .SLLPGDILA | R.YYRAKGEN  | ....VLYVSG | SDCNGTPI   | IAI   | RAKQEGV.TA  |
| baan2 | .SLLPGDILA | R.YYRAKGEN  | ....VLYVSG | SDCNGTPI   | IAI   | RAKQEGV.TA  |
| clpe2 | .SWMAGDILA | R.YHRAKGDE  | ....VIFVSG | SDCHGSPILN |       | KAKEINK.SP  |
| deet  | GAYLPADIFA | R.YHRTRGDE  | ....VLMVSG | SDMHGTPITI |       | RAEQEGI.TA  |
| codi  | GFGVPSDVFA | R.YQRMGAE   | ....VLMVSG | TDEHGTPLL  | LV    | QADKEGV.SV  |
| thnw  | GAYLGADV   | R.YNRLMGNQ  | ....VLYVSG | SDEYGTPI   | TV    | RAEKEGR.SP  |
| thvo  | GAYLGADV   | R.FNRLIGNE  | ....VLYVSG | SDEYGTPI   | TV    | RAEKEGK.SP  |
| pogi  | GVYVPADIYA | R.YLRLRGRD  | ....CLLIGG | SDEHGVP    | IAL   | KAKAEGC.TP  |
| bafr  | GVYVPADIYV | R.YLRLKKED  | ....VLFIGG | SDEHGVP    | PITI  | RAKKEGI.TP  |
| cyhu  | GVYVPADIYA | R.FLRSKGEN  | ....VLFIGG | SDEHGVP    | PITI  | RAKKEGV.TP  |
| chte  | GVYLPADIYV | R.YKRLCGHD  | ....VIHIGG | SDEHGVP    | PITI  | TADKEGI.SP  |
| chmu  | GAYLPADVYA | R.FQRLGKE   | ....VLYICG | SDEYGIAITL |       | NAELAGM.GY  |
| chtr  | GAYLPADVYA | R.FQRLQGKE  | ....VLYICG | SDEYGIAITL |       | NAELAGM.GY  |
| chpn  | GVYLPADVYA | R.FRLLGDD   | ....VLYICG | SDEFGIAITL |       | NADREGL.GY  |
| fugu  | GCVLSADVFS | R.YSRLRGWN  | ....VLFVCG | TDEYGTATEN |       | KAIEEGL.TP  |
| hosa  | GCVLSADVFA | R.YSRLRQWN  | ....TLYLCG | TDEYGTATET |       | KALEEGL.TP  |
| anga  | GCVLSADIFA | R.YSRLCGYN  | ....TLYIGG | TDEYGTATET |       | KALAENM.TP  |
| drme  | GCVLSADIYA | R.YSRSAGYN  | ....TLLICG | TDEYGTATEN |       | KALAENL.TP  |
| sace  | GCVLSADIFA | R.YCKGRNYN  | ....ALFICG | TDEYGTATET |       | KALEEGV.TP  |
| scpo  | GSTLSADVFA | R.YHRARNHN  | ....TLYICG | TDEYGTATET |       | KALEEGV.SP  |
| didi  | GCVLSADVYA | R.RYCRLKNYN | ....CIYICG | TDEYGTATET |       | KALSEGC.TP  |
| arth  | GCVLSADVYA | R.YCRLRGYN  | ....AIYICG | TDEYGTATET |       | KALEENC.TP  |
| orsa  | GCVLSADVFA | R.YCRLRGYN  | ....VIYICG | TDEYGTATET |       | KAMEEK.C.SP |
| cael  | GCVLSADVFA | R.YCNLRGHQ  | ....TFYVGG | TDEYGTATET |       | KALQEGC.TP  |
| encu  | GCVLSADVYS | R.YCKKKGEV  | ....SVYICG | TDEYGTAIEM |       | EAISQGV.TP  |



|       |             |             |              |            |            |
|-------|-------------|-------------|--------------|------------|------------|
| trde  | .QVLSADVFA  | R.FCRLKEYE  | ...TLYICG    | TDEYGTATET | KALEEKK.SP |
| trpa  | .QGLSADVFA  | R.FCRMGRYH  | ...TCFVCG    | TDEYGTASET | RAAEQGL.SP |
| bobu  | .QVLSADAFV  | R.YSKMSGIE  | ...TLYVCG    | TDEYGTATET | KALIENT.TP |
| cacr  | GSMLPADVYA  | R.FKRAQGHE  | ...TLYICA    | TDEHGTPAEL | AAAAAGQ.DV |
| suto  | GSVLSADVFA  | R.YARLKYGQ  | E..NVVSVSG   | SDEHGTPIEV | EAKKRN.NP  |
| suso  | GSILSADVFA  | R.YARLRYGK  | E..NVLFVSG   | SDEHGTPIEI | EAIKRKV.NP |
| aepe  | GSVLSADIYA  | R.YLRLRGRQ  | ...VVFVSG    | SDEHGTPIEL | EARKKGV.HP |
| pyba  | GSVLSADVYA  | R.YLRLKGHE  | ...VVFVSG    | SDVHGTPVEV | EAIQLGV.DP |
| pyho  | GAYLPADIFV  | R.YLRLKGED  | ...VVFICG    | TDEHGTPISF | RALKEGR.SP |
| pyab  | GAYLPADIFV  | R.YLRLKGED  | ...VVFICG    | TDEHGTPISF | RALKEGR.SP |
| pyfu  | GAYLPADIFV  | R.YLRLKGED  | ...VVFICG    | TDEHGTPISF | RALNEKR.SP |
| meja  | STYIPADIIY  | K.YLKLKRGD  | ...VIHVGG    | TDNHGVPITL | TAEKEGK.SP |
| meth  | STYIPADIYA  | R.YRRLRGDD  | ...VLFVCA    | TDEHGTPIAV | KAEAEGR.TP |
| arfu  | .TYVPADVYV  | R.YLRMSGEE  | ...VVFVCG    | SDCHGTPIVV | NAEQQGL.SP |
| hanrc | .TYVSGDAFS  | R.ALKRLGQE  | ...TVFVSG    | TDMHGTPIAV | QAIEAGV.GP |
| psfl  | .EYIQDMWV   | R.FQKHRGNQ  | ...CIYVCA    | DDAHGSAIML | RAEKEGI.TP |
| psae  | .EYIQDMWV   | R.FQKMRGNQ  | ...AVYVCA    | DDAHGSAIML | RAEREGI.TS |
| esco  | .EHIQADVWV  | R.YQRMRGHE  | ...VNFICA    | DDAHGTPIML | KAQQLGI.TP |
| saty  | .EHIQADVWV  | R.YQRMRGHE  | ...VNFICA    | DDAHGTPIML | KAQQLGI.TP |
| yepe  | .EHIQADIWV  | R.FQRMGNQ   | ...VHFICX    | DDAHGTPIML | KAQQXGI.EP |
| vich  | .EHIQADIWV  | R.YQRLRGNT  | ...VNFICA    | DDAHGTPIML | KAQQMGM.TP |
| haein | .EHIQADIWV  | R.FQRMGNK   | ...IHFVCA    | DDAHGTPIML | NADKLG.TP  |
| acac  | .EHIQADIWV  | R.FQRMRGNE  | ...IHFVCA    | DDAHGTPIML | KADQMGI.TP |
| pamu  | .EHIQADIWV  | R.FQRMGRHK  | ...VHFICA    | DDAHGTPIML | NADKLG.TP  |
| neme  | .EHIQTDVWV  | R.FQKLRGNE  | ...CHYCCA    | DDTHGTPVML | AAQKQGI.AP |
| nogo  | .EHIQTDVWV  | R.FQKLRGHE  | ...CYCCA     | DDTHGTPVML | AAQKQGI.AP |
| xyfa  | .GYIQADIWV  | R.ARRLGGHN  | ...TWFVCA    | DDTHGTPIML | AAEKAGM.PP |
| buAPS | .EHIQADIWV  | R.YHRMRGHE  | ...VVFVSA    | DDAHGTAIML | KAQDLEI.SP |
| sime  | .ELIATDAMA  | R.FQRLDG..  | ..REVFFLTG   | TDEHGQKMQQ | TAKKEGI.SP |
| agtu  | .ELIATDAMA  | R.FQRLDG..  | ..MDVFFLTG   | TDEHGQKMQQ | TARAEGI.SP |
| brsu  | .ELIATDAMA  | R.FQRLNG..  | ..MDVYFLTG   | TDEHGKMLQ  | SARKEGI.TP |
| melo  | .TVIATDALA  | R.FQRLDG..  | ..KDVFFLTG   | TDEHGLKMQQ | TAEKEGI.TP |
| rhpa  | .EAIATDALA  | R.FQRLDG..  | ..KDVFFLTG   | TDEHGLKMIQ | TAQKEGL.TP |
| mytu  | .EYIATDAIA  | R.FKRLDR..  | ..YDVRFLTG   | TDEHGLKVAQ | AAAAAGV.PT |
| rhru  | .TTLACDVLA  | R.FKRLDG..  | ..FDVKFLTG   | TDEHGQKVQK | SATAAGI.DP |
| noar  | .EAIAADVIA  | R.FQRAMG..  | ..RDVRFQTG   | TDEHGLKMAQ | KARELGI.TP |
| rico  | .TSVASDVIA  | R.FMRLRG..  | ..FDVMFLTG   | TDEHGQKVEK | AAINKNI.DP |
| ripr  | .TSVASDVIA  | R.FMRF CG.. | ..KDV MFLT G | TDEHGQKVEK | AAINQNI.DP |
| plyo  | .EII LADAIA | R.YHRNLG..  | ..RDIFFTTG   | ADEHGLKIAN | QALRNNM.TP |
| plfa  | .EIVLADAIA  | R.YHKIIG..  | ..RDTFFTTG   | ADEHGLKIAN | QAAKNNM.TP |
| clpel | .TTVAADAIA  | R.FKRLTG..  | ..HEVMFLTG   | TDEHGQKIER | IANEKGI.TP |
| clac  | .TTVASDALV  | R.FKRLQG..  | ..YDAFMLTG   | TDEHGQKIQR | IAEDKGI.TP |
| liin  | .TTVAGDAMA  | R.YKRLKG..  | ..YDV FYLTG  | TDEHGQKIQA | KAKERGI.SE |
| limo  | .TTVAGDAMA  | R.YKRLKG..  | ..YDV FYLTG  | TDEHGQKIQA | KAKERGI.SE |
| baan1 | .TTVAGDAMA  | R.YKCMQG..  | ..YNVHYLTG   | TDEHGQKIQK | KAEELNV.TP |
| bacel | .TTVAGDAMA  | R.YKRMQG..  | ..YNVHYLTG   | TDEHGQKIQK | KAEELNV.TP |
| basu  | .TTVAGDAMA  | R.YKRLKG..  | ..FDVRYLTG   | TDEHGQKIQQ | KAEQENI.TP |
| bast  | .TTVAGDAMA  | R.YKRLRG..  | ..YDVMYLTG   | TDEHGQKIQR | KAQEKGV.TP |
| baha  | .TTVAGDAMA  | R.YKRLRG..  | ..YNVMYLTG   | TDEHGQKIEQ | KAEAKGL.TP |
| enfa  | .TTIACDAMA  | R.YKRLMG..  | ..FDV FYLTG  | VDEHGQKIEK | KAAELNV.TP |
| ocih  | .TTIACDVMA  | R.YKRMRG..  | ..FDV FYLTG  | SDEHGQKIEQ | KAKEMNI.SP |
| stpy  | .TTIACDVLA  | R.YKRLMG..  | ..HEV FYLTG  | LDEHGQKIQT | KAKEAGI.TP |

```

stpn .TTIACDVLA R.YKRLMG.. .YDVFFYLTG LDEHGQKIQQ KAE EAGI.TP
stmu .TTIACDVLA R.YKRMMN.. .HDVFFYLTG LDEHGQKIQQ KSEEAGI.TP
lala .TTIACDVLA R.YKRLMG.. .FDTFFYLTG LDEHGMKIQR KAEELGM.TP
stau .STVAGDVIA R.YKRMQG.. .YDVRVYLTG TDEHGQKIQE KAQKAGK.TE
oeoe .TTVLADSV A R.FHRALG.. .EDVFFFLT G TDEHGLKIQE KAE AAGK.SE
thma .TTIVADI I A R.YKRFGM G.. .YDVFFFLT G TDEHGQKVLQ AAQQAGK.DP
thth .TTVVADFL A R.WHRLDG.. .YRTFFFLT G TDEHGETVYR AAQAAGE.DP
dera .EKILADA I A R.YQRLAG.. .RDVTFVMG TDEHGEKISK AAKGGV.TP
stco .TTVAGDVLT R.WHRQRG.. .EKVWYLTG TDEHGQKIMR TAEANGV.TP
hepyj99 .TTLIADTLK K.YYTLOG.. .EEVFFFLT G TDEHGQKIEQ SARLRNQ.SP
hepy26695 .TTLIADTLK K.YYTLOG.. .EEVFFFLT G TDEHGQKIEQ SARLRNQ.SP
caje .TTIIADTL A R.FYRLQG.. .HETRFLT G TDEHGQKIEE AAKLRNS.TP
aqae .TTIAADT I A R.YYRLRD.. .YDVFFFLT G TDEHGLKIQK KAEELGI.SP
funu .TTIAADV I N R.YNKAMG.. .MDTHFVTG LDEHGQKVEQ AAKQNGF.TP
trer .TTIAADTL A R.FQRLQG.. .RSVLMITG TDEHGQKIQR TAENKGR.NP
sy6803 .TTVVADTL A R.FKRLQG.. .YDVLMITG TDEHGQKIQR TAEAQEL.DP
arth_1 .TTIAADS I A R.FQRLLG.. .KKVIFITG TDEHGEKIAT SAAANGR.NP
prma .TTLICDS I A R.YKRLTG.. .ADVIFITG VDEHGLKIQR TAKNKGV.EP
caelmt .SALLADAL C R.HRRLRVPG S.ASTRFSTG TDEHGLKIQQ AAATAGL.AP
hosamt .SALLADAL C R.HRRLRGPS T.AATRFSTG TDEHGLKIQQ AAATAGL.AP
tarumt .SAVIADCFH R.HKQLQG.. .FNSRFATG TDEHGLKIQQ AA E AAGK.EP
drmemt .SAVIADAHC R.YQRLRYPE Q.DVRLCTG TDEHGTKIQQ AASLHGV.PV
anga2 .SSVIADA I H R.FNQITRPA ESGDCFLSTG TDEHGLKIQQ AA I KHST.ST
didimt .SALLGDAL G R.WN..R... .RFMTG TDEHGSKVDE AAKKNGL.KT
caabmt .SMLIADTR N K.WEKLNPSK ...ESFMLTG TDEHGLKIQS TAEKLG L.EP
sacemt .SSLLSDVYH R.WQLFKGN. ...LSFFTTG TDEHGLKIQC ASESNQFDQP
scpomt .SLVLTDA I A R.FQNLKPDV ...SVISSTG TDEHGLKVQT VAQTEGV.SP
lema .STLIVDVLG R.YHRVKGE.. .EVFVMTG TDEHGQKVAE AAKQGV.SP
myge .TTILADVI K R.FKIQNG.. .YEAFLLVG SDEHGKIES KAKSLNL.DP
mypn .TTILADVI K R.YKQONG.. .YEAYFLT G TDEHGKIES KAKSLGL.DP
urur .TTIIADVLA R.YKRLFG.. .YDVFFFLT G MDEHGQKIQQ KAFEENI.SP
mypu .STNIAWVLR N.YKKIQG.. .YETFFSTG SDEHGQKIFN KAQELKL.ET

```

351

400

```

mask ***** . . . . . ***** * . . . . ***** ** . . . . . *
stpn2 KEIADFYHKE FKETFE.KLG FTYDLYSRTD SPLHHEIVQE LFLQLYEKKF
bace2 KEIANKYHEE FQRCFR.NLG FTYDCYTRTD SEHHHKT VQK VFLRLLLEEGH
baan2 KEIANKYHEE FERCFR.NLG FTYDCYTRTD SEHHHETVQN VFLRLLLEEGH
clpe2 EELINKYHRE FVRCFN.KLG FSNIFTRTD SEYHEKQVKN I IKS LYNKGF
deet AEVAERYHRL FMASWP.KLG ISWDCYTSTA TANHARTAQQ MFLSLEYEGY
codi KELADRYNRQ IVEDLA.GLG LSYDLFTRTT TRNHYAVVQD LFKGLYENGY
thnw KEIADIYEE HLRTFE.NLG ISFDIFMRTT WPEHSENAQD FFIKLLNEGY
thvo QEIADRYYAE HIETFK.KLG INF DIFMRTT YPEHSSVAQE FFLKLLNEGV
pogi QEVVD RYHEL IKRSFE.GLG ISFDIYSRTT SDIHRRTASE FFKTLYEKGE
bafr QDVVD RYHFL IKKSFE.EFG ISFDVYSRTS SKTHHELASD FFKKLYEKGE
cyhu QQVVDKYHVQ IKQSFE.ELG ISFDIYSRTS SKIHAETSSE YFKKLYEDGK
chte QEVVD RYHTM NAE AFA.KCG ISFDYYGR TS GPVHHQTARE FFLEIEK KGI
chmu QEYVDMYHKL HKDTLK.KLG ISVDFFSRTT NPHHPAIVQD FYRNLQDKGL
chtr QEYVDMYHKL HKDTFK.KLG ISVDFFSRTT NTYHPAIVQD FYRNLQERGL
chpn QEYVDMYHKL HKDTFE.KLG FALDFFSRTT NPFHAELVQD FYSQLKASGL
fugu QEICDKYHAI HSAIYK.WFQ IDFDFFGRTT TEKQTVIAQD IFWRLLHKNNF
hosa QEICDKYHII HADIYR.WFN ISFDIFGR TT TPQQT KITQD IFQQLLKRGF

```

|       |             |             |            |             |             |
|-------|-------------|-------------|------------|-------------|-------------|
| anga  | RQICDKYFDI  | HNSIYR.WFG  | IGFDYFGRTT | TAEQTRIVQD  | IFKELYASGY  |
| drme  | REICDKYFEL  | HNAIYR.WFG  | IGFDYFGRTT | TQEQTCEPQS  | WLYHHRERGA  |
| sace  | RQLCDKYHKI  | HSDVYK.WFQ  | IGFDYFGRTT | TDKQTEIAQH  | IFTKLNNSNGY |
| scpo  | KELCDKYHAL  | HKEVYD.WFE  | IDFDHFGRRT | TPKQTGIAQH  | IFTKLYNNDY  |
| didi  | KEICDKYHEI  | HKEIYE.WFN  | ISFDKFGRTS | TNSQTEIAQD  | IFNKIKDNGY  |
| arth  | KEICDKYHAI  | HKEVYD.WFG  | ISFDKFGRTS | TPEQTEVCQA  | IFNKLWDNKW  |
| orsa  | KEICDKYHAV  | HSEVYK.WFD  | IKFDKFGRTS | SPQQTEVCQA  | IFQKLMENNW  |
| cael  | RELCDKYHAI  | HKGIYE.WFG  | IDFSHFGRRT | TDHQTEICQD  | MFLKLHKNGY  |
| encu  | LEICEKNRKL  | HKQVYD.WFN  | IDFDYFGFTS | SATHTGLVQD  | LFMKMYDNHG  |
| trde  | EELCSFYHAI  | HAEIYN.WFN  | IAFDYFGRTS | TPQQTEITQG  | IFNDLDKNGY  |
| trpa  | AQLCAHYHAL  | HRDIYQ.WFD  | LSFDYFGRTT | SDAHTELTQA  | LFRHLDARGF  |
| bobu  | LELCNKYYEI  | HKSIYK.WFN  | IEFDIFGRRT | NKNHQDIVQN  | FFLQLEKNGY  |
| cacr  | ATYCAEQHVL  | QHEVGR.AFG  | LSWDHFGRSS | SPQNHRLTQH  | FCQALEDHGL  |
| suto  | KELTDQAHEY  | DKKLFLDVWE  | ISYNNYTRTE | SEIHKTFVRD  | FMLKLEK..Y  |
| suso  | KELTDQAHEY  | DRHLFLNVWK  | ISFDNYTRTE | SEIHKKFVRE  | FLLKLTK..Y  |
| aepe  | KELTDQVHEY  | DVKMWR.EYR  | ISFDNYSRTE | SPVHKEFVME  | FMKKLEENGY  |
| pyba  | AEYSMKMHAI  | VAELFK.KWN  | ISFDLYTHTH | SETHIKFVQD  | FYLKIYENGY  |
| pyho  | REIVDEFHEH  | IKITFQ.RAK  | ISFDFFGRTE | LPIHYKLSQQ  | FFLKAYENGH  |
| pyab  | REIVDEFHEQ  | IKITFQ.RAK  | ISFDFFGRTE | LPIHYKLSQE  | FFLKAYENGH  |
| pyfu  | REIVDEFHEH  | IKTAFQ.RVK  | ISFDYFGRTE | LPVHYRLSQE  | FFLKALENGY  |
| meja  | EEIVEKYHNE  | IKEDLD.LLG  | VEFDAFGKTH | SQIHIEATAQE | FYLKLEKNGY  |
| meth  | LEVATRYHEM  | IRGDLE.RCD  | ISFDSFTRTT | DELHHEIAQK  | FFLKLYEKGF  |
| arfu  | KELVDIYHEH  | FIKIFD.ALN  | IKFDYFGRTD | SDYHHHRTTE  | IVKRLIEKGY  |
| hanrc | LDLGLERHEQ  | YADTFE.EFS  | VAFDTYGHTD | EETNVELTRE  | FVGAWEDNDH  |
| psfl  | EQLIANVQAE  | HSADFA.EFL  | VDFDNFHSTH | AEENRELSSQ  | IYLKLRDAGH  |
| psae  | EQLIDAVRAE  | HMGDFA.DFL  | VDFDNHSTH  | SEENRELSSA  | IYLKLRDAGH  |
| esco  | EQMIGEMSQE  | HQTDFA.GFN  | ISYDNYHSTH | SEENRQLSEL  | IYSRLKENGF  |
| saty  | EQMIGEMSQE  | HQTDFA.GFN  | ISYDNYHSTH | SDENRELSEL  | IYTRLKENGF  |
| yepe  | EQMIAEMSQE  | HQODFA.GFA  | ISYDNYHSTH | SDENRELSSL  | IYGRLEKANGY |
| vich  | EAMIEMVSEE  | HQRDFA.GFD  | ISFDNYHSTH | SDENRELASH  | IYLQLEKNGF  |
| haein | EELIAKAKAD  | HIRDFA.GFN  | ISFDNYHSTH | SEENKQLTAE  | IYNKLEKANGF |
| acac  | EQLIDDRVQK  | HMAFDA.GFN  | ISFDNYHSTH | SEENRELSEL  | IYNRLKENGF  |
| pamu  | EALIARSKAD  | HVADFE.GFN  | ISYDNYHSTH | SPENEALTAE  | MYKKLRANGF  |
| neme  | EDMIAKVREE  | HLADFT.GFF  | IGYDNYYSTH | SPENKQFSQD  | IYRALKANGK  |
| nogo  | EDMIAKVRKE  | HLADFT.GFF  | IGYDNYYSTH | STENKQFSQD  | IYRALKANGK  |
| xyfa  | EAFIATTQAS  | HERDFA.AFN  | VAFDHYDSTH | SPVNRHLTEQ  | SYLTLKQAGH  |
| buAPS | NKLIKNIKRIE | HQIDFS.NFK  | ISHDNYYSTH | SLENLYLSRK  | IFTCLNEKGL  |
| sime  | QELAARNSAE  | .FQNMARLLN  | ASNDDFIRTT | EQRHHEASQA  | IWMRMGEAGD  |
| agtu  | EELAQRNSDQ  | .FREMGLLN   | ASNDDFIRTT | EERHHESTRN  | IWNLMADSGD  |
| brsu  | RELADRNTSA  | .FRRMAEVLN  | SSNDYIRTS  | EERHYKASQA  | IWQAMVANGD  |
| melo  | QALADRNSAI  | .FRSMTEAVG  | GSNDEYIRTT | EPRHYASCQA  | IWKAMAANGD  |
| rhpa  | HALATRAGR   | .FREMDDLRLG | VSYDRFIRTS | EEQHHRVQVE  | VWKRMDKGD   |
| mytu  | AALARRNSDV  | .FQRMQEALN  | ISFDRFIRTT | DADHHEASKE  | LWRRMSAAGD  |
| rhru  | QTFTDRVSAN  | .FRDLAAMN   | FSNDAFIRTT | EPRHKEACKA  | LWTLLEVERGE |
| noar  | RELSDEMSSY  | .FIKMCDELN  | VSYDVFIRTT | EERHHASTQE  | LWRRMEANGD  |
| rico  | QKFTDQTSSES | .FRHLMTAMH  | ISNDDFIRTT | EHRHKKAVAV  | FWQKLLDNGT  |
| ripr  | QTFTDKTSQN  | .FRDLMVAMN  | ISNDDFIRTT | ENRHKKAVAV  | FWKKLLDNGA  |
| plyo  | QELCDLNVIK  | .FKKLNKDLH  | TTEDYVVRTT | ADIHKKIAQS  | IWMKCVENGD  |
| plfa  | KELCDKNVLK  | .FQNLNKLLY  | VEDDYVVRTT | RDSHKKIAQE  | VWDKCEKNGD  |
| clpel | KEHVDEIVAG  | .IKDLWKMMN  | ISYDKFIRTT | DDYHVKAVQE  | IFKKLYDQGD  |
| clac  | KAYVDEIVAG  | .IKDLWKMMN  | ISYDKFIRTT | DEEHVKAVQK  | IVKKFYDNGD  |
| liin  | QEYVDEIAEG  | .FQELWKKLE  | ISNTDFIRTT | QDRHKTSVEK  | IFEQLLEQGD  |

|           |             |               |            |             |             |
|-----------|-------------|---------------|------------|-------------|-------------|
| limo      | QEYVDEIAEG  | .FQELWKKLE    | ISNTDFIRTT | QDRHKTSVEK  | IFEQLLEQGD  |
| baan1     | QAYVDNIVAG  | .IKELWEKMD    | ISYDDFIRTT | EDRHKDVVEK  | IFKQLVDQGD  |
| bace1     | QAYVDNIVAG  | .IKELWEKMD    | ISYDDFIRTT | EDRHKDVVEK  | IFKQLVDQGD  |
| basu      | QEYVDRAAAD  | .IQKLWKQLE    | ISNDDFIRTT | EKRHKVVEK   | VFQKLLDNGD  |
| bast      | QQYVDDIVAG  | .IQELWRKLD    | ISYDDFIRTT | QERHKKIVEK  | IFARLVEQGD  |
| baha      | KQFVDEIVSG  | .IQDLWKKLD    | ISYDDFIRTT | EERHIKVVQQ  | IFEQLLDQGD  |
| enfa      | KEYVDKMAAD  | .VQKLWKTLD    | ISYDKFIRTT | DDYHMAAVQQ  | IFDRLVEQGD  |
| ocih      | KAYVDDMAEG  | .MKKLWNTLE    | ISNDKFIRTT | EEQHKKVVAD  | IFERFLEQGD  |
| stpy      | QTYVDNMAKD  | .VKALWQLLD    | ISYDTFIRTT | DDYHEEVVAA  | VFEKLLAQDD  |
| stpn      | QAYVDGMAVG  | .VKELWQLLD    | ISYDKFIRTT | DDYHEKVVAQ  | VFERLLAQDD  |
| stmu      | QAYVDGMAVG  | .VKELWQLLD    | ISYDKFIRTT | DDYHEKVVAQ  | VFEKLLAQDD  |
| lala      | KEYLDPMAAD  | .VQELWKKLD    | ISYDKFIRTT | DTYHEEAVAK  | AFEQLLEQDD  |
| stau      | IEYLDEMIAG  | .IKQLWAKLE    | ISNDDFIRTT | EERHKHVVEQ  | VFERLLKQGD  |
| oeoe      | MEYLDEMAVS  | .IKKLWKLMLN   | ISYDKFIRTT | DEYHERVVQH  | IFKKFMDEGD  |
| thma      | QEFCDLAEK   | .FKRLWKELK    | ITNDYFIRTT | DEMHHMKTVE  | FVAKMKENGD  |
| thth      | KAFVDRVSGR  | .FKRAWDLG     | IAYDDFIRTT | EERHKKVVQL  | VLKKVYEAGD  |
| dera      | QELVDDLSE   | AFQGLWKKLG    | ISYDFFIRTT | SAKHKKYVQD  | VLQRVYDAGD  |
| stco      | QAWADKLVTE  | SWKPLWEHL     | IANDDFIRTT | QKRHTDRVQE  | FVQDLYDKGE  |
| hepyj99   | KAYADSI     | SAI.FKNQWDFFN | LDYDGFIRTT | DSEHQKCVQN  | AFEIMFEKGD  |
| hepy26695 | KAYADSI     | STI.FKDQWDFFN | LDYDGFIRTT | DSEHQKCVQN  | AFEIMFEKGD  |
| caje      | QEYADKISFE  | .FKKLWDEFE    | ITYDIYARTT | DTRHIEFIKA  | MFLKMWQKGD  |
| aqae      | KELVDRNAER  | .FKKLWEFLK    | IEYTKFIRTT | DPYHVKFVQK  | VFEECYKRGD  |
| funu      | QAWTDKMTPN  | .FKNMWAALD    | IKYDDFIRTT | EDRHKKAVKR  | ILDIVNAKGD  |
| trer      | KEHCDSVVRG  | .FESLWEQLN    | IQYDRFIRTT | APNHEKIVKE  | FFQRVWEKED  |
| sy6803    | QTHCDRTVVK  | .FKELWRSLN    | ILYDRFSRTT | DPRHLAIVKD  | FFQRVWDKGD  |
| arth_1    | PEHCDLISQS  | .YRTLWKDLD    | IAYDKFIRTT | DPKHEAIVKE  | FYARVFANGD  |
| prma      | QFHCDEISDI  | .FKQNWKNWD    | ITHNKFVRTS | SQKHEYIVKE  | FYNRVKKSDD  |
| caelmt    | IELCDRVSAQ  | .FLQLFREAD    | ISSTDFIRTT | EARHRVAVQH  | FWGVLEARGL  |
| hosamt    | TELCDRVSEQ  | .FQQLFQEQAG   | ISCTDFIRTT | EARHRVAVQH  | FWGVLKSRLG  |
| tarumt    | LEFCTTVSER  | .FRHLFSSCN    | ISNTDYIRTT | EQRHHRVAVQH | FWSVLCSSKGL |
| drmemt    | AKYCDDISQR  | .YREVFERSAS   | IQQDDFIRTT | EDRHKRAVAN  | FWRTLHTRGH  |
| anga2     | EDYCDIAISTK | .YRELFDRFQ    | IDYSRFIRTT | DTDHRQAVQA  | FWRSLAASDS  |
| didimt    | IDYCDKISNR  | .FRELFDKAD    | IKYDDFIRTT | EPRHKEAVTA  | IWNRLLEGRY  |
| caabmt    | KVLVDKVSQN  | .FSKLAEQFD    | VNYDRFIRTT | DNDHIELVRY  | FWNLMMKGF   |
| sacemt    | KKFVDKLYPE  | .FVQLDKIYG    | INYTRFIRTT | DPDHIENVMK  | LWELCLKNGY  |
| scpomt    | LQLCDRNSKR  | .FADLAVAA     | TKFTHFIRTT | NPKHQASVQE  | FWKTIQKAGM  |
| lema      | MDFTTSVSSE  | .FKQCFQEMN    | YDMNYFIRTT | NPTHEKLVQD  | IWKKLAAGD   |
| myge      | KTFVDINAQA  | .FKLMWKTLD    | ISFDHFIRTT | DEIHKQQVQK  | TFQDLYDKKL  |
| mypn      | QTFVDQNVAY  | .FQQMWKQLD    | INFDFHIRTT | DLSHKAQVQH  | AFQLLYDKGL  |
| urur      | KALVDRNSII  | .FLNLWKRLN    | ISFSKFIRTT | QMDHEESVQK  | VFSYLYKQGK  |
| mypu      | QDYVDRQANK  | .FIDFWKKAN    | IDYDFFARTT | NKEHKEVVRE  | IFHKLKEKNI  |

401

450

|       |            |             |            |            |            |
|-------|------------|-------------|------------|------------|------------|
| mask  | *****      | *****       | .....      | .....      | .....      |
| stpn2 | LYTKKIKQLY | CTFDNQFLPD  | RFVEGKCPN. | .CG.THSRGD | QCDN.CSAIL |
| bace2 | IYKKTVEQAY | CETCTQFLPD  | RYVEGICPH. | .CH.EAARGD | QCDN.CSAIL |
| baan2 | IYKKTVEQAY | CETCTQFLPD  | CYVEGVCPH. | .CH.EEARGD | QCDN.CSAIL |
| clpe2 | IYEKETEIFY | CP.....     | ...K.....  | .....      | .....CCDTL |
| deet  | IYKDTVCQPF | CPHCNRFLPD  | RYVEGTCPH. | .CKYEGARGD | QCDN.CGKPL |
| codi  | MIKETTMAV  | SPSTGRTLPLD | RYIEGTCPY. | .CGASGARGD | QCDN.CGNQL |
| thnw  | IEKGTMIAPF | CRKIGRFMPD  | RYIEGTCPY. | .CHYPKARGD | QCDN.CGRTL |
| thvo  | IEKGTMIAPY | CRKIGRFMPD  | RYIEGECY.  | .CGYKKARGD | QCDN.CGRTL |

|       |            |            |            |            |            |
|-------|------------|------------|------------|------------|------------|
| pogi  | FVEQTSEQYY | DEEAKQFLAD | RYIIGTCPH. | .CSNDRAYGD | QCEA.CGTSL |
| baf   | FIEKTSEQYY | DEEAHQFLAD | RYITGECPH. | .CHSEGAYGD | QCEK.CGTSL |
| cyhu  | FIEQTSEQYY | DPKAEQFLAD | RYIIGTCPK. | .CGNENAYGD | QCEK.CGSTL |
| chte  | FVKKTEKQFF | DPKAGRFLSD | RYITGTCPV. | .CKTPGANGD | QCEQ.CGTHL |
| chmu  | MENLVTDQLY | SEEEKFLAD  | RYVVGTCPK. | .CGFDRARGD | ECQQ.CGADY |
| chtr  | VENQVTEQLY | SEEEKFLAD  | RYVVGTCPK. | .CGFDRARGD | ECQQ.CGADY |
| chpn  | IENRISEQLY | SEQEQRFLAD | RYVEGTCPR. | .CGFDHARGD | ECQS.CGADY |
| fugu  | LLEDTVEQLR | CENCQRFLAD | RFVEGICPH. | .CAYPEARGD | QCDK.CGRLI |
| hosa  | VLQDTVEQLR | CEHCARFLAD | RFVEGVCPF. | .CGYEEARGD | QCDK.CGKLI |
| anga  | IETRSVEQLL | CQKCDRYLAD | RFVEGTCPHP | GCGYEDARGD | QCDG.CGKLV |
| drme  | VALP.KGTLF | QAPTYPLFCY | SFVEGTCPHP | GCGYEDARGD | QCDK.CGKLV |
| sace  | LEEQSMKQLY | CPVHNSYLAD | RYVEGECPK. | .CHYDDARGD | QCDK.CGALL |
| scpo  | MAIDTMTQLY | CEVHQGYLAD | RYVEGTCPK. | .CGYDDARGD | QCDG.CGGLL |
| didi  | TLTQEIEQLY | S.....     | .....      | .....      | .....KLL   |
| arth  | LSENTMQQLY | CDTCKKFLAD | RLVEGSCPFE | GCNYDSARGD | QCEK.CGKLL |
| orsa  | LTENTMQQLY | CDTCQRFLAD | RLVEGKCPTE | GCNYEAARGD | QCEN.CSKLL |
| cael  | TSSQSVDQLY | CNQCEKFLAD | RFVTGTCP.. | MCAYDDARGD | QCDG.CGKLI |
| encu  | FSEVEIEQFY | CEHCGLFLAD | RFIVGECKF. | .CGDGRARGD | QCDS.CGHTY |
| trde  | ITEHTIEQLY | CPSCKRFLAD | RYVLGTCP.  | .CSYDGARGD | QCEH.CGKLL |
| trpa  | ISEHESAQAY | CLHCARFLAD | RYLRGTCPH. | .CRNAEARAD | QCEH.CGVLL |
| bobu  | IKERETEQFY | CNKDSMFLAD | RYVIGECPE. | .CQ.SMAKGD | QCDN.CSKLL |
| cacr  | IEERVDQMVY | SVDDKRFLPD | RYVEGTCPH. | .CKFEKARGD | QCDN.CGNLL |
| suto  | IKIEEDEIPY | CEYDKIYLPD | RFVKGTCPY. | .CGFEDARGD | QCDN.CGRLI |
| suso  | IKVSEDEIPY | CENDKLYLPD | RFVKGTCPY. | .CGFEDARGD | QCDN.CGKLL |
| aepe  | IFSQEEVLPY | CERDKIFLPD | RFVEGTCPY. | .CGYEKARGD | QCDE.CGRLI |
| pyba  | IFTKEDEVY  | CPRDKIYLPD | RFIIGKCPY. | .CGYERARGD | QCEN.CGRLI |
| pyho  | LVKKVTKQAY | CEHDKMFLPD | RFVIGTCPF. | .CGAENQRGD | QCEV.CGRPL |
| pyab  | LVKKVTKQAY | CEHDKMFLPD | RFVIGTCPY. | .CGAEDQKGD | QCEV.CGRPL |
| pyfu  | LVKKVTKQAY | CEHDKRFLPD | RFVIGTCPY. | .CGAENQRGD | QCEV.CGRPL |
| meja  | IYEKEIEQFY | CPNCKKFLPD | RYVEGICPY. | .CGG.EARGD | HCEV.CGRHL |
| meth  | IYEKDIKQLY | CGDCQRFLPD | RYVEGTCPY. | .CGSEGARGD | HCEG.CGRHL |
| arfu  | VYPKEIQLAY | CPKCQRFLPD | RYVEGICPY. | .CG.ALARGD | ECDQGCGRHL |
| hanrc | VYETEIQVAY | DPDADQWLPD | RYVEGTCPY. | .CG.EHARGD | ECDEGCQRHL |
| psfl  | IAQRSITQYF | DPEKKMFLAD | RFIKGTCPK. | .CGTEDQYGD | NCEK.CGATY |
| psae  | IDTRPVTQYF | DPEKQMFLAD | RFIKGTCPK. | .CGTADQYGD | NCEA.CGATY |
| esco  | IKNRTISQLY | DPEKGMFLPD | RFVKGTCPK. | .CKSPDQYGD | NCEV.CGATY |
| saty  | IKNRTISQLY | DPEKGMFLPD | RFVKGTCPK. | .CKSADQYGD | NCEV.CGATY |
| yepe  | IKNRTISQLY | DPEKGXXLPD | RFVKGTCPK. | .CXAPEQYGD | NCEV.CGATY |
| vich  | ISSRTISQLF | DPEKEMFLPD | RFVKGTCPK. | .CKSEDQYGD | NCDA.CGETY |
| haein | IKSKVISQLF | DPEKNMFLPD | RFVKGTCPK. | .CKAEDQYGD | NCEV.CASTY |
| acac  | IKSRTISQLY | DPEKGMFLPD | RFVKGTCPK. | .CKSPDQYGD | NCEV.CAATY |
| pamu  | IKSRTISQLF | DPEKGMFLPD | RFVKGTCPK. | .CKAEDQYGD | NCEV.CSSTY |
| neme  | IESRVIEQLF | DPEKQMFLPD | RFVKGECPK. | .CHAQDQYGD | NCEV.CGTTY |
| nogo  | IESRVIEQLF | DPEKQMFLPD | RFVKGECPK. | .CHAQDQYGD | NCEV.CGTTY |
| xyfa  | ITCRSVAQFY | DPAKGMFLPD | RYVKGTCPN. | .CGATDQYGD | NCEA.CGATY |
| buAPS | IKEKKIFQLY | DTVKKIFLPD | RFIKGTCP.  | .CKSKNQYGD | NCEI.CSATY |
| sime  | LYKDSYAGWY | SVRDEAYYQE | NETELRGDG. | .....      | .....      |
| agtu  | IYKDSYAGWY | SVRDEAYYAE | DETEVRADG. | .....      | .....      |
| brsu  | IYKGGYAGWY | SVRDEAYYGE | EETEVADG.  | .....      | .....      |
| melo  | IYLDYSGWY  | SVRQEAYFDE | SETTLGEDG. | .....      | .....      |
| rhpa  | IYLDYSGWY  | SVRDEAYYAE | DETVVGDG.  | .....      | .....      |
| mytu  | IYLDNYSGWY | SVRDERFFVE | SETQLVDGT. | .....      | .....      |

|           |            |             |             |        |          |
|-----------|------------|-------------|-------------|--------|----------|
| rhru      | IYLDAYRGWY | AVRDEAFYGE  | DELTTAADG.  | .....  | .....    |
| noar      | LYLDRYEGWY | SVRDEAFYDE  | SELVAGEGG.  | .....  | .....    |
| rico      | IYEGFYEGWY | AVRDEAFFDE  | SELTR.....  | .....  | .....    |
| ripr      | IYEGFYEGWY | SVRDEAFYDE  | SEINE.....  | .....  | .....    |
| plyo      | IYLGEYEGWY | NVREETYIPE  | NEAKLMN...  | .....  | .....    |
| plfa      | IYLGEYEGWY | NVREETYVPE  | NEAKLMN...  | .....  | .....    |
| clpel     | IYKDSYEGLY | CTPCESFWTE  | TQLVN.....  | .....  | .....    |
| clac      | IYKSAYEGWY | CTPCESFWTE  | TQLVD.....  | .....  | .....    |
| liin      | IYLGEYEGWY | SVSDEEYFTE  | TQLEEVYKDE  | .....  | .....    |
| limo      | IYLGEYEGWY | SVSDEEYFTE  | TQLEEVYKDE  | .....  | .....    |
| baan1     | IYLDEYEGWY | SVQDETFYTE  | HQLVDP.IME  | .....  | .....    |
| bacel     | IYLDEYEGWY | SVQDETFYTE  | HQLVDP.IME  | .....  | .....    |
| basu      | IYLDEYEGWY | SIPDETFYTE  | TQLVDIERNE  | .....  | .....    |
| bast      | IYLGEYEGWY | CTPCESFYTE  | RQLVD.....  | .....  | .....    |
| baha      | IYLGDYEGWY | SIPDETFYTE  | TQLVDKEYDA  | .....  | .....    |
| enfa      | IYLGEYEGWY | SVSDEEFFTE  | TQLAEVYRDD  | .....  | .....    |
| ocih      | IYLDEYEGWY | SVPDETFYTE  | TQLEDVERDD  | .....  | .....    |
| stpy      | IYLGEYSGWY | SVSDEEFFTE  | SQLKEVFRDE  | .....  | .....    |
| stpn      | IYLGEYSGWY | SVSDEEFFTE  | SQLAEVFRDE  | .....  | .....    |
| stmu      | IYLGEYSGWY | SVSDEEFFTE  | SQLEEIFRDE  | .....  | .....    |
| lala      | IYLKGYAGWY | SVSDEEFFTE  | TQLEEIFRDE  | .....  | .....    |
| stau      | IYLGEYEGWY | SVPDETYYTE  | SQLVDP.QYE  | .....  | .....    |
| oeoe      | IYKGNVTGWY | SVSDEEYFTE  | SQLAEVYRDK  | .....  | .....    |
| thma      | VYKGIYKGWY | CVPCETFWNE  | DEVIK.....  | .....  | .....    |
| thth      | IYYGEYEGLY | CVSCERFYTE  | KELVEG....  | .....  | .....    |
| dera      | IYFAEYEGLY | SVGAERYVTE  | KELVEGP...  | .....  | .....    |
| stco      | IYKGGYEGPY | CVGCEEYKLP  | GELLDGEGEY  | .....  | .....    |
| hepyj99   | IYKGTYSGY  | CVSCEYSYCAV | SKVDNTDSK.  | .....  | .....    |
| hepy26695 | IYKGAYSGY  | CVSCEYSYCAI | SKADNTNDK.  | .....  | .....    |
| caje      | IYKDEYEGHY | CISCESFFTQ  | SQLINDCS..  | .....  | .....    |
| aqae      | IYLGEYEGWY | CVGCEEFKSE  | AELAEDHT..  | .....  | .....    |
| funu      | IYKGEYEGKY | CVSCETFFPE  | NQLNGSNK..  | .....  | .....    |
| trer      | IYLSQQKGWY | CVSCEEFKEE  | RELTED....  | .....  | .....    |
| sy6803    | IYLAQQQGWY | CVACEEFKEK  | RDILLED.... | .....  | .....    |
| arth_1    | IYRADYEGLY | CVNCEEYKDE  | KELLEN....  | .....  | .....    |
| prma      | IYMGVQKGWY | CVGCEEFKDN  | PDNSPT....  | .....  | .....    |
| caelmt    | LYKGIYEGWY | CASDECFLPE  | AKVTRQV...  | .....  | .....G   |
| hosamt    | LYKGVYEGWY | CASDECFLPE  | AKVTQQP...  | .....  | .....G   |
| tarumt    | IYKGSYEGWY | STQDESFLTP  | SQVTTAL...  | .....  | .....D   |
| drmemt    | IYSAAYSGWY | CVSDETFLTD  | SQLRLD....  | .....  | .....E   |
| anga2     | IYSASYSGWY | CVPDETFLTD  | SQLKEN....  | .....  | .....E   |
| didimt    | IYKGVYKGWY | CTSDESFLTD  | DQVTEGMSPI  | T..... | .....PQN |
| caabmt    | IYTDTHSGWY | SISDETFEPE  | TQIEEVV...  | .....  | .....K   |
| sacemt    | IYMGEHKGWY | SISDETFYPE  | SKVIKDP...  | .....  | .....K   |
| scpomt    | ISFERHEGWY | CVSDETFYPE  | SAIQKVV...  | .....  | .....D   |
| lema      | IYLKGYEGWY | SVSDESFLTA  | QNVADG....  | .....  | .....V   |
| myge      | IYQSEWKGAY | CVECEQNY..  | ...FTF....  | .....  | .....    |
| mypn      | IYQSNWEGAY | CVECEQNY..  | ...FTY....  | .....  | .....    |
| urur      | IYLGQWTGY  | CVSCEENYNP  | AEIIKS....  | .....  | .....    |
| mypu      | IYLDKYVGLY | SVSDEEFLTE  | TQALKK....  | .....  | .....    |



|           |             |             |             |              |            |
|-----------|-------------|-------------|-------------|--------------|------------|
| nogo      | SPTLINPYS   | AVSGA.KPEL  | RESEHFFFKL  | GECADFLKAW   | TSGNNPHDG. |
| xyfa      | DPTLNPNYS   | VISGT.TPEL  | RDSEHFFFEV  | AHFDTFLRHW   | LSG.DV.... |
| buAPS     | EPTDLINPIS  | VISGK.KPIL  | KNTKHLDFDL  | PSFTNMLKKW   | IHS.GV.... |
| sime      | .....VRYG   | PQ.GTP.VEW  | VEEESYFFRL  | SAYQDKLLKH   | YEE.NPD... |
| agtu      | .....VRYG   | PQ.GTP.VEW  | VEEESYFFFKL | SEYQEKLLKL   | YEE.NPD... |
| brsu      | .....VRYG   | PQ.GTP.VEW  | VEEESYFFRL  | SAYQDKLLDL   | YEN.NPG... |
| melo      | .....VRRE   | PL.GSP.VEW  | NEEESYFFRL  | SAYQDKLLAL   | YES.QPD... |
| rhpa      | .....VRRG   | PQ.GTP.VEW  | VEEKSYFFKL  | SAYQDKLLKL   | YED.QPD... |
| mytu      | .....RLTV   | ET.GTP.VTW  | TEEQTYFFRL  | SAYTDKLLAH   | YHA.NPD... |
| rhru      | .....SRLA   | PT.GAP.VEW  | VEEPSYFFRL  | SKWQQPLLDL   | YAA.RPD... |
| noar      | .....EKLS   | PQ.GTP.VDW  | TVEESWFFRL  | SKYAEPLLKL   | YEE.NPG... |
| rico      | .....DGLA   | PT.GAP.VEW  | VKEPSYFFNL  | SKWQDKLLEF   | YEA.NPD... |
| ripr      | .....DKLA   | PT.GAP.VEW  | VKEPSYFFNL  | AKWQDKLLEF   | YEL.NPD... |
| plyo      | .....YID    | PLNNVK.LEK  | MKEPSYFFRM  | SKYQDRLLQY   | IHD.NPD... |
| plfa      | .....YID    | PLNNIK.LEK  | MKEPSYFFKM  | SKYQDKLIEY   | IQS.NPD... |
| clpel     | .....GNC    | PDCGRP.VEK  | AKEEAYFFKM  | SKYADRLIQY   | IEE.HPD... |
| clac      | .....GKC    | PDCGRP.VEK  | TKEEAYFFKM  | SKYADRLIKY   | IED.HPD... |
| liin      | .NGKVI GGKA | P.SGNE.VEL  | VKEESYFFRM  | SKYADRLVEY   | YNS.HPE... |
| limo      | .NGKVI GGKA | P.SGNE.VEL  | VKEESYFFRM  | SKYADRLVEY   | YNS.HPE... |
| baan1     | .GDKVVG GKS | PDSGHD.VEL  | VREESYFFRM  | GKYVDRL LKF  | YED.NPH... |
| bacel     | .GDKVVG GKS | PDSGHD.VEL  | VREESYFFRM  | GKYVDRL LKF  | YEE.NPH... |
| basu      | .KGEVIG GKS | PDSGHP.VEL  | IKEESYFFRM  | GKYADRL LKY  | YEE.NPT... |
| bast      | .....GNC    | PDCGRP.VEK  | VKEESYFFRM  | SKYVDRL LQY  | YEE.NPD... |
| baha      | .DGNLIG GKS | PDSGHP.VEK  | VREQSYFFRM  | SKYADRL LQF  | YEE.NPQ... |
| enfa      | .EGNVIG GKA | P.SGHE.VEL  | VKEESYFFRM  | SKYADRL VQY  | YEE.HPE... |
| ocih      | .DGNVIG GKS | PDSGHP.VEL  | IKEESYFFRM  | SKYADRL LKF  | YED.NPE... |
| stpy      | .DGQVIG GIA | P.SGHE.VEW  | VSEESYFLRL  | SKYDDRL VAF  | FKE.RPD... |
| stpn      | .AGNVTG GIA | P.SGHE.VEW  | VSEESYFLRL  | SKYQDR LVEF  | FKA.HPE... |
| stmu      | .DGKVI GGIA | P.SGHE.VEW  | VSEESYFLRL  | SNYADRL VDF  | FHA.HPD... |
| lala      | .SGNITG GIA | P.SGHE.VEW  | VEEETYFFRM  | GKYADW L LQY | YDE.HPD... |
| stau      | .NGKIIG GKS | PDSGHE.VEL  | VKEESYFFNI  | SKYTDRL LEF  | YDQ.NPD... |
| oeoe      | .DGKVI GGKA | P.SGHE.VQL  | VKEETYFFKM  | SKYSDW L LQY | YHD.HPE... |
| thma      | .EGE..ERFC  | PECKRP.VKW  | VEEENYFFRL  | SKYRDSL LKY  | YEE.HPD... |
| thth      | .....LC     | PIHGRP.VER  | RKEGNYFFRM  | EKYRPWL QEY  | IQE.NPD... |
| dera      | .DGV...RRF  | PGDKDP.PEL  | RREANYFFNM  | QKYQPWL LET  | LQQ.NPD... |
| stco      | .AG...QKLC  | PIHKKP.VEI  | LSEENYFFKL  | SEYSEKLLAH   | YEA.NPG... |
| hepyj99   | .....VLC    | PDCLRE.TTL  | LEEESYFFKL  | SAYEKPLLEF   | YAK.NPE... |
| hepy26695 | .....VLC    | PDCLRE.TTL  | LEEESYFFRL  | SAYEKPL LDF  | YAK.NPE... |
| caje      | .....C      | PDCGKQ.TRI  | LKEESYFFKL  | SKYQDK I LQW | YEE.K.D... |
| aqae      | .....C      | PIHQKK.CEY  | IKEPSYFFRL  | SKYQDK LLEL  | YEK.NPE... |
| funu      | .....C      | PDCGKD.LTV  | LKEESYFFKM  | SKYADAL LKH  | IDE.HPD... |
| trer      | .....KHC    | VIHTNQKVEW  | RDEQNYFFRL  | SRYQERL QAF  | YQD.RQE... |
| sy6803    | .....NHC    | PLHPNRKAEW  | RDEENYFFRL  | SRYQHPL EEL  | YAQ.RPE... |
| arth_1    | .....NCC    | PVHQMP CVAR | K.EDNYFFAL  | SKYQKPL EDI  | LAQ.NPR... |
| prma      | .....HKC    | PIHQKT.LEW  | KNEENLFFKL  | SKYQSQ I EEL | IK..EPA... |
| caelmt    | PSG.DPCPVS  | LESGHP.VSW  | TKEENYIFKL  | SQFREPL QRW  | LGN.NPQ... |
| hosamt    | PSG.DSFPVS  | LESGHP.VSW  | TKEENYIFRL  | SQFRKPL QRW  | LRG.NPQ... |
| tarumt    | STG.KEIKVS  | LESGHK.VEW  | MKEENYMFRL  | SGFRSQL LDW  | LRE.NPR... |
| drmemt    | AT...GTRYS  | LESGHP.VEW  | TEETNYMFRL  | SQFQDDVRHW   | VK..TEA... |
| anga2     | R...GEKYS   | LESGHP.VEW  | TEENYMFRL   | SRYQDDVRHW   | VKGLEGR... |
| didimt    | PIS.KKCMIS  | LESGHE.VNW  | IEEENYMFKL  | SEFSKTIENW   | FE..EVK... |
| caabmt    | NG..KAVKIS  | SETKNE.VVY  | QEETNYFFKL  | SMFQEQL IQF  | LKQ.NPE... |



|        |            |            |            |            |            |
|--------|------------|------------|------------|------------|------------|
| sacemt | N...DGKYLN | TESKNE.VVY | QSETNYFFRL | SLFNKKIVDH | IRK.NPD... |
| scpomt | PATKQEKRV  | METGKE.VQW | SSEMNYHFLL | SKFQSRLEH  | YNK.NPN... |
| lema   | DRDGKPCV   | LESGHV.VTW | VEEENYMFRL | SAFRERLLKY | FHD.HPN... |
| myge   | ...NKQTML  | CEIGHN.LSL | VQEPWFISF  | SSTKNWIETT | IGK.NQL... |
| mynp   | ...DKQTML  | CEIGHQ.LTL | VQEPSLFIAF | KDSKDWIGEM | IAT.NKL... |
| urur   | ...QDNIML  | CRMGHK.LET | KSEESYFYKM | SDQAPFLKTY | YQN.HPN... |
| mypu   | ...DNKFFH  | PVSNHE.LIK | IEEESYFFNL | NLFIDWIKEF | LDQ.D..... |

501

550

|       |             |             |            |            |             |
|-------|-------------|-------------|------------|------------|-------------|
| mask  | .....       | .....       | ...*****   | *.....**   | ****.....   |
| stpn2 | ..RWRKNAIN  | LTKRYLREG.  | ...LPDRAVT | R..DLP..NG | IPVPIDG...  |
| bace2 | ..TWRDNAIQ  | LTERYVKEG.  | ...LLDRAVS | R..DLP..IG | VPIPVEG...  |
| baan2 | ..TWRDNAIQ  | LTERYVKEG.  | ...LLDRAVS | R..DLP..IG | VPIPVEG...  |
| clpe2 | ...WRENAIK  | ITKRYLEGG.  | ...LRDKILT | R..EIN..WG | IEVPIEG...  |
| deet  | ..YWRTNVLN  | FTRLRYLKEG. | ...LKDRAIT | R..DLD..WG | VPLPLPGYE.  |
| codi  | ..DWRPNVLK  | FSLNLLED..  | ...LRPRAMS | R..DID..WG | IPIPVEGWQD  |
| thnw  | ..FWKPNVLA  | YTQNFISGG.  | ...LKKRPIT | R..DID..WG | VKIPLDGYD.  |
| thvo  | ..FWKPNVLA  | YTRNFIQGG.  | ...LKKRAIT | R..DID..WG | VKVPLEGYE.  |
| pogi  | ..EWKSNVYG  | QCKSWLDMG.  | ...LQPRAVS | R..DLD..WG | IPVPVEG...  |
| bafr  | ..EWRPNVYG  | QCKSWLDMG.  | ...LQPRAVS | R..DLD..WG | IPVPVEG...  |
| cyhu  | ..NWKTNVYG  | QCKSWLDQG.  | ...LQPRAVT | R..DLD..WG | VPVPVAG...  |
| chte  | ..DWRSNVVN  | YSRTWLNQG.  | ...LADRAIT | R..DLA..WG | ISLPLDSEE.  |
| chmu  | ...LRPHMRN  | FVIDYIKN..  | ...LRPRAVT | R..DLS..WG | VPVPG.....  |
| chtr  | ...LRPHMRN  | FVTDYIEH..  | ...LRPRAVT | R..DLS..WG | IPVPD.....  |
| chpn  | ...LPDHVRK  | FVVDYIEH..  | ...VRSRAIT | R..DLS..WG | IPVPD.....  |
| fugu  | ..DWTANAKQ  | ITRSWLRDG.  | ...LKPRCIT | R..DLK..WG | TPVPH.....  |
| hosa  | ..DWTNAQF   | ITRSWLRDG.  | ...LKPRCIT | R..DLK..WG | TPVPLE....  |
| anga  | ..GWTHNARV  | ITRAWLKEG.  | ...LKSRCIT | R..DLK..WG | IPVPLE....  |
| drme  | ..GWTHNAKV  | ITRAWLKEG.  | ...LKPRCIT | R..DLK..WG | IPVPHE....  |
| sace  | ..NWSKNSKT  | ITQSWLKDG.  | ...LKPRCIT | R..DLV..WG | TPVPLE....  |
| scpo  | ..KWSNNGRS  | ITESWLKEG.  | ...LRPCIT  | R..DLK..WG | TPVPLE....  |
| didi  | ..NWSSENSIA | ITNTWVKGE.  | ...LKPRCIT | R..DLK..WG | TPVPM.....  |
| arth  | ..SWSQNAIQ  | TTNAWLRDG.  | ...LRQRCIT | R..DLK..WG | VPVPHE....  |
| orsa  | ..MWSQNAIQ  | ATNAWLKEG.  | ...LKPRCIT | R..DLK..WG | VPVPHE....  |
| cael  | ..NRWSSNAV  | ITKAWMKLG.  | ...LDPRCIT | R..DLK..WG | TAVPLD....  |
| encu  | ..HLWSQNAQN | IFRQWISME.  | ...FYPRCMT | R..DLKFNWG | VPVPLE....  |
| trde  | ..RWSNNALQ  | MSKSWLRDG.  | ...LQERAIT | R..DLK..WG | IPVPK.....  |
| trpa  | ..LWTKNAVR  | MTEGWLRTG.  | ...LQERAIT | R..DLR..WG | VPVPA.....  |
| bobu  | ..NWNNTNALK | MTKAFLRDG.  | ...LKERAIT | R..DLK..WG | IPVPK.....  |
| cacr  | ..DWPPPLARS | IAYKHLDEG.  | ...LIDRGIT | R..DLA..WG | IPVAQDGVPR  |
| suto  | ..TLPENVKS  | VALSWVKEG.  | ...LKPRSIT | R..DNA..WG | IPAPFE....  |
| suso  | ..EMPDNVKS  | VALSWVGEG.  | ...LKPRSIT | R..DNK..WG | IPAPFE....  |
| aepe  | ..ELQDSVKK  | YSINWVAQG.  | ...LKPRSVT | R..DLS..WG | VPAPFK..... |
| pyba  | ..HLPPNAKE  | MSLAMLKEG.  | ...LRPRAVT | R..DNK..WG | IPAPFP..... |
| pyho  | ..PWKPNVKN  | MVLKWIEEG.  | ...LEERAIT | R..DLN..WG | IPVPLDEED.  |
| pyab  | ..PWKPNVKN  | MVLSWIEEG.  | ...LEERAIT | R..DLN..WG | IPVPLDEED.  |
| pyfu  | ..DWKPNVKN  | MVLGWIEEG.  | ...LEERAIT | R..DLD..WG | IPVPLDEED.  |
| meja  | ..EMPEHVKN  | MALNWIKE..  | ...LHDWDIS | R..DIS..WG | VPIPG.....  |
| meth  | ..EMPSNVRN  | YAIQWLREG.  | ...LKDWILT | R..DME..WG | VQVPLEGN..  |
| arfu  | ..KGTENALN  | YARNWVKN..  | ...LRDWCIT | R..NLE..WG | VRFPGE....  |
| hanrc | ..EGTNNAKN  | QPREWIEGG.  | ...LEDFCIT | R..DLD..WG | IDYPGEGG..  |
| psfl  | ...LQDAVAN  | KIAEWLDAG.  | ...LQQWDIS | R..DAP.YFG | FEIPGE....  |

|           |            |            |             |            |            |
|-----------|------------|------------|-------------|------------|------------|
| psae      | ...LQESVAN | KLAEWLDSG. | ...LQQWDIS  | R..DAP.YFG | FEIPDA.... |
| esco      | ...LQEQVAN | KMQEWFESG. | ...LQQWDIS  | R..DAP.YFG | FEIPNA.... |
| saty      | ...LQEQVAN | KMQEWFESG. | ...LQQWDIS  | R..DAP.YFG | FEIPNA.... |
| yepe      | ...LQEQVAN | KMQEWFDSG. | ...LQQWDIT  | R..DAP.YFG | FEVPDA.... |
| vich      | ...LQSETAN | KMQEWFEGG. | ...LQQWDIS  | R..DAP.YFG | FEIPGE.... |
| haein     | ...LQSEIAN | KMQEWFESD. | ...LQQWDIS  | R..DAP.YFG | FEIPGA.... |
| acac      | ...LQSEVVN | KMQEWFEGG. | ...LQQWDIS  | R..DAP.YFG | FQIPNE.... |
| pamu      | ...LQPEIAN | KMQEWFESG. | ...LQQWDIS  | R..DAP.YFG | FKIPDT.... |
| neme      | KPHLQAEALN | KMKEWLGEGE | ETTLSDDWDIS | R..DAP.YFG | FEIPDA.... |
| nogo      | KPHLQPEALN | KMKEWLGEGE | ETTLSDDWDIS | R..DAP.YFG | FEIPDA.... |
| xyfa      | ...ALPSVKN | KLKEWLDAKG | G..LRPWDIS  | R..DAP.YFG | FEIPNQ.... |
| buAPS     | ...LEESVIK | KTEEWFKVG. | ...LKSVAIS  | R..DAP.YFG | FKIPNY.... |
| sime      | FIGPAERRNE | VIS.FVKSG. | ...LKDLSVS  | R...TTFDWG | IKVP.....  |
| agtu      | FIGPAERRNE | IIS.FVKSG. | ...LKDLSIS  | R...TTFDWG | IKVP.....  |
| brsu      | FIMPAERRNE | IVS.FVKSG. | ...LKDLSIS  | R...TTFDWG | IPVP.....  |
| melo      | FVGPAERRNE | VMS.FVKSG. | ...LKDLSIS  | R...TTFKWG | VPVP.....  |
| rhpa      | FIGPDSRRNE | VIS.FVKSG. | ...LKDLSVS  | R...TTFDWG | VKVP.....  |
| mytu      | FIAPETRRNE | VIS.FVSGG. | ...LDDLSIS  | R...TSFDWG | VQVP.....  |
| rhru      | FIAPDSRRNE | VIS.FVKGK. | ...LTDLSIS  | R...TTFSWG | VPVP.....  |
| noar      | FIQPDSRRNE | VMR.FVEGG. | ...LRDLSVS  | R...TSFDWG | VKVP.....  |
| rico      | FIRPISRRNE | VIS.FVKSG. | ...LKDLSVS  | R...TTFNWG | IKVP.....  |
| ripr      | FVRPISRRNE | VIS.FIKSG. | ...LKDLSIS  | R...TTFHWG | IKVP.....  |
| plyo      | FIQPEKRNNE | ILQ.RLKEP. | ...LEDLSCS  | R...TKFTWG | IPVP.....  |
| plfa      | YIQPEQKRNE | ILQ.RLKEP. | ...LADLSCS  | R...TKFTWG | IQVP.....  |
| clpel     | FIQPESRKNE | MLNNFLRPG. | ...LQDLCVS  | R...TSFTWG | IPVS.....  |
| clac      | FIQPESRKNE | MLNNFLKPG. | ...LQDLCIS  | R...SSFDWG | IPIT.....  |
| liin      | FILPESRKNE | MINNFIKPG. | ...LEDLAVS  | R...TTFDWG | IKVP.....  |
| limo      | FILPESRKNE | MINNFIKPG. | ...LEDLAVS  | R...TTFDWG | IKVP.....  |
| baan1     | FIQPESRKNE | MINNFIKPG. | ...LEDLAVS  | R...TSFDWG | VRVP.....  |
| bacel     | FIQPESRKNE | MINNFIKPG. | ...LEDLAVS  | R...TSFDWG | VRVP.....  |
| basu      | FIQPESRKNE | MINNFIKPG. | ...LEDLAVS  | R...TTFDWG | VKVP.....  |
| bast      | FIQPESRKNE | MINNFIKPG. | ...LEDLAVS  | R...TTFDWG | IKVP.....  |
| baha      | FIQPESRKNE | MINNFIKPG. | ...LEDLAVS  | R...TSFTWG | VPVP.....  |
| enfa      | FIQPESRKNE | MLNNFIKPG. | ...LEDLAVS  | R...TTFSWG | IPLK.....  |
| ocih      | FIQPESRKNE | MINNFIKPG. | ...LEDLAVS  | R...TTFSWG | VQVP.....  |
| stpy      | FIQPDGRMNE | MVKNFIEPG. | ...LEDLAVS  | R...TTFTWG | VPVP.....  |
| stpn      | FITPDGRLNE | MLRNFIKPG. | ...LEDLAVS  | R...TTFTWG | VPVP.....  |
| stmu      | FIQPDGRMNE | IKNFIEPG.  | ...LEDLAVS  | R...TSFTWG | VKVP.....  |
| lala      | FIQPEVRKNE | MVNNFIKPG. | ...LEDLALT  | R...TSFTWG | IPVP.....  |
| stau      | FIQPPSRKNE | MINNFIKPG. | ...LADLAVS  | R...TSFNWG | VHVP.....  |
| oeoe      | FLQPESRMNE | MISNFIKPG. | ...LEDLALT  | R...TSFNWG | IPVP.....  |
| thma      | FVEPDFRRNE | MLK.ILEGG. | ...LKDLSIT  | R...TTFKWG | VPMK.....  |
| thth      | LIRPEGYRNE | VLA.MLAEP. | ...IGDLSIS  | RP.KSRVPWG | IPLP.....  |
| dera      | LIQPAGYRNE | VLE.MLKED. | ...IGPLSIS  | RP.KARVPWG | IPLP.....  |
| stco      | FVQPESARNE | VVN.FVRQG. | ...LQDLSIS  | R...STFDWG | VPVP.....  |
| hepyj99   | AILPIYRKNE | VTS.FIEQG. | ...LLDLSIT  | R...TSFEWG | IPLPKKM... |
| hepy26695 | AILPVYRKNE | VTS.FIEQG. | ...LLDLSIT  | R...TSFEWG | IPLPKKM... |
| caje      | PILPKNKNE  | LIN.FVQNG. | ...LKDLSIT  | R...TSFDWG | IKLPQEI... |
| aqae      | FIQPDYRRNE | IIS.FVKQG. | ...LKDLSVT  | RP.RSRVKWG | IPVP..F... |
| funu      | FILPHSRNE  | VIS.FIKQG. | ...LQDLSIS  | R...NTFSWG | IPID.....  |
| trer      | FIQPQSRNE  | VLS.FVNQG. | ...LQDFSIS  | R...VNVDWA | FKLP.....  |
| sy6803    | FIQPSSRRNE | VLN.FVAQG. | ...LQDFSIS  | R...VNLDWG | FPLP.....  |

|        |            |            |            |            |           |
|--------|------------|------------|------------|------------|-----------|
| arth_1 | FVQPSYRLNE | VQS.WIKSG. | ...LRDFSIS | R...ALVDWG | IPVP..... |
| prma   | FIQPKERRNE | IIN.FVSKG. | ...LKDFSIS | R...TNVSWG | ISVP..... |
| caelmt | AITPEPFHQA | VLQWLEEE.. | ...LPDLSVS | R.RSSHLHWG | IPVP..... |
| hosamt | AITPEPFHHV | VLQWLDEE.. | ...LPDLSVS | R.RSSHLHWG | IPVP..... |
| tarumt | AIQPERFHHS | VLQWLQEE.. | ...LPDLSVS | R.QKSRLQWG | IPVP..... |
| drmemt | RVRPAKFEKI | LLDTLSEP.. | ...LPDVSVS | R.PSNRVHWA | IPVP..... |
| anga2  | RIQPDKFGRI | LLDWLEEP.. | ...LPDISIS | R.PMNRVSWG | VPVP..... |
| didimt | PIFPAIHVNL | LRYMLSQG.. | ...IKDLSIS | R.PSSRIPWG | IEVP..... |
| caabmt | FIKPKHRYQF | ILKELEDT.K | ...LPDLSIS | R.PSSRLKWS | IEVP..... |
| sacemt | FIFPASKRDQ | ILKELETGGT | ...LPDLSIS | R.PSARLKWG | IPTP..... |
| scpomt | FVQPSIFHTQ | VLEELKTG.. | ...ISDLSIS | R.PKQRLSWG | IPVP..... |
| lema   | CIVPEFRRE  | VIKTVEKG.. | ...LFDLSIS | RKRESVMNWS | IPVP..... |
| myge   | NIIPKSRASE | LKNNFINNG. | ...LNDLALT | R..KN.VTWG | IKVP..... |
| mypn   | NITPESRAAE | LKNNFLDGG. | ...LNDLALT | R..QN.VTWG | IPVP..... |
| urur   | FIIPNERANE | MVNNFLNN.. | ...LEDLSIS | R..TT.FDWG | IPIA..... |
| mypu   | IISSKAIVNE | LKSNFINKG. | ...LENLSVT | R..IK.LDWG | IKID..... |

551

600

|       |             |            |           |            |              |
|-------|-------------|------------|-----------|------------|--------------|
| mask  | .....****   | *****      | ***       | .....      | .....        |
| stpn2 | ..FRDKKIYV  | WFEAVAGYYT | ASV...DWA | QKLQ.....  | .....NNIT    |
| bace2 | ..YEDKKIYV  | WIEAVTGYYT | ASK...HWA | EKTG.....  | .....KDDQ    |
| baan2 | ..YEDKKIYV  | WIEAVTGYYT | ASK...HWA | EETG.....  | .....KDDR    |
| clpe2 | ..FEDKRVYV  | WIDALLAYVT | ASK...KVI | EEKG.....  | .....QSLE    |
| deet  | ...GKRLYV   | WFEAVIGYLS | ASI...EWA | ASKG.....  | ...QPDEWQ    |
| codi  | ..NGAKKLYV  | WFDVAVGYLS | ASI...EWA | YRTG.....  | ...DPEAWK    |
| thnw  | ...SKRIYV   | WFEALIGYIT | GAK...EYS | KRTG.....  | ...NPDLWK    |
| thvo  | ...HKRIYV   | WFEALIGYIT | GAK...MFS | EVIG.....  | ...KPNYWK    |
| pogi  | ..AEGKVLVY  | WFDAPIGYIS | NTK...ELC | PDS.....   | .....WE      |
| bafr  | ..AEGKVLVY  | WFDAPIGYIS | NTK...ELL | PDS.....   | .....WE      |
| cyhu  | ..AEGKVLVY  | WFDAPIGYIS | AAK...DYF | KNSEIKA... | ..VHKNNTWE   |
| chte  | ..AKGKVLVY  | WFDVAVGYIS | FTK...EWA | EKQG.....  | ...DAELWR    |
| chmu  | ..LENKVIFYV | WFDAPIGYIS | GTM...DWA | ASIG.....  | ...DPDAWK    |
| chtr  | ..LENKVIFYV | WFDAPIGYIS | GTM...DWA | ASIG.....  | ...DPEAWK    |
| chpn  | ..FPGKVFYV  | WFDAPIGYIS | GTM...EWA | ASQG.....  | ...NPDEWK    |
| fugu  | .DFKEKVFYV  | WFDAPIGYLS | ITA...NYT | DK.....    | .....WE      |
| hosa  | .GFEDKVFYV  | WFDATIGYLS | ITA...NYT | DQ.....    | .....WE      |
| anga  | .GYEKKVFYV  | WFDAPIGYIS | ITS...RYC | KE.....    | .....WK      |
| drme  | .GFEKKVFYV  | WFDAPFGYVS | MTK...RYT | KE.....    | .....YQ      |
| sace  | .KYKDKVLVY  | WFDATIGYVS | ITS...NYT | KE.....    | .....WK      |
| scpo  | .EFKGVLYV   | WFDATIGYIS | ITA...NYT | DE.....    | .....WE      |
| didi  | .EFKDKVFYV  | WFDAPIGYIS | ITA...EYT | NE.....    | .....WE      |
| arth  | .KYKDKVFYV  | WFDAPIGYVS | ITS...CYT | SE.....    | .....WE      |
| orsa  | .KYKDKVFYV  | WFDAPIGYVS | ITA...SYT | PD.....    | .....WE      |
| cael  | .GFEKKVFYV  | WFDAPIGYLS | ITK...CVL | GDN.....   | .....WT      |
| encu  | .KFKEKVFYV  | WFDAPIGYLT | FLK...ELV | GED.....   | .....FG      |
| trde  | .GFEDKVFYV  | WFDAPIGYIS | ITK...CWA | DLAG.....  | .....KDWK    |
| trpa  | .GFEQKVFYV  | WFDAPVGYIS | ITK...CGT | EAASSQEGGG | TDDGVKEKWQ   |
| bobu  | .GFENKVIFYV | WFDAPIGYIS | ITK...N.. | .....      | ...IKNWE     |
| cacr  | PGFEEKVFYV  | WFDAPIEYIA | ATQ...EWA | EGSP.....  | ...DRDWK     |
| suto  | .GAEGKTIYV  | WFEALLGYIS | ATI...EYF | K.....     | ..KIGKEEWWK  |
| suso  | .GAQDKSIYV  | WFEALLGYIS | AVI...EYF | E.....     | ..RKGDEKWK   |
| aepe  | .GAEGKTIYV  | WFDALLGYVS | ATK...ELF | IM.....    | ..RRGDPEEWWK |

|       |            |            |            |            |             |
|-------|------------|------------|------------|------------|-------------|
| pyba  | .GAEGKTIYV | WFEAVLGYIS | AVV....EYF | K.....     | .KIGREEEWK  |
| pyho  | ..MKNKVLVY | WFEAPIGYIS | ITM....EYF | KRLGKP.... | .....NEWK   |
| pyab  | ..MKGKVLVY | WFEAPIGYIS | ITI....EHF | KRIGKP.... | .....NEWK   |
| pyfu  | ..MKNKVLVY | WFEAPIGYIS | LTI....EYF | KRIGKP.... | .....NEWK   |
| meja  | ...TNQVMYV | WLEAPIGYIS | FT.....    | KMLG.....  | .....EIWK   |
| meth  | ...EGKIIYV | WGEAFLGYIS | SAA....AWS | KKTG.....  | .....RDWR   |
| arfu  | ...PNLVVYV | WVDAPIGYIS | FTE....KAC | EEKG.....  | .....CDWR   |
| hanrc | ...DDLVLVY | WVDAPIEYVA | ATK....QYS | ERVGTEE... | .....FDWA   |
| psfl  | ...PGKYFYV | WLDAPIGYMA | SFK....NLC | NRTPE..... | .....LDFD   |
| psae  | ...PGKYFYV | WLDAPIGYMA | SFK....NLC | ARRPE..... | .....LDFD   |
| esco  | ...PGKYFYV | WLDAPIGYMG | SFK....NLC | DKRGDS.... | .....VSFD   |
| saty  | ...PGKYFYV | WLDAPIGYMG | SFK....NLC | DKRGDT.... | .....TSFD   |
| yepe  | ...PGKYFYV | WLDAPIGYMG | AFK....NLC | DKRGD..... | .....LDFD   |
| vich  | ...KDKFFYV | WLDAPIGYMG | SFK....NLC | DKRGD..... | .....LDFN   |
| haein | ...KDKFFYV | WLDAPIGYMA | SFK....NLC | NRE.G..... | .....IDFN   |
| acac  | ...EGKYFYV | WLDAPIGYMA | SFK....NLC | KRESH..... | .....IDFD   |
| pamu  | ...EDKYFYV | WLDAPIGYMA | SFK....NLC | DKT.G..... | .....LNFN   |
| neme  | ...PGKYFYV | WLDAPVGYMA | SFK....NLC | DRIG.....  | .....VDFD   |
| nogo  | ...PGKYFYV | WLDAPVGYMA | SFK....NLC | DRIG.....  | .....IDFD   |
| xyfa  | ...PGKYFYV | WLDAPIGYLC | SFK....TLC | TRIG.....  | .....EDFD   |
| buAPS | ...PNKYFYV | WLDAPIGYIS | AFK....NLC | FKSKK..... | .....LNFN   |
| sime  | .NDPSHVMYV | WVDALTNVVT | ATG....CL  | TDP.....   | .....TGPR   |
| agtu  | .DDPKHVMYV | WVDALTNVIT | ATG....YI  | EDR.....   | .....NGPR   |
| brsu  | .GDEKHVMYV | WVDALTNVIT | ALG....YP  | .DT.....   | .....TDERW  |
| melo  | .GDDKHVMYV | WVDALTNVIT | AAG....YP  | .DT.....   | .....KSDQW  |
| rhpa  | .GDPEHVMYV | WVDALTNVIS | GVG....FP  | .DE.....   | .....NDKNW  |
| mytu  | .EHPDHVMYV | WVDALTNVLT | GAG....FP  | DTD.....   | .....SEFR   |
| rhru  | .GDEDHVMYV | WLDALTNVIT | AVG....FP  | .DQ.....   | .....TGDYA  |
| noar  | .GCDGHVMYV | WVDALTNVIT | GLG....FP  | .DE.....   | .....NGDFA  |
| rico  | .NNEKHVIYV | WLDALANYIS | ALG....YL  | .DE.....   | .....QSNNY  |
| ripr  | .NNRKHVIYV | WLDALVNYIS | ALG....YP  | .DK.....   | .....QSNNYA |
| plyo  | .NDPKHVMYV | WMDALINYYS | SCF....IN  | .....      | .....NQEKV  |
| plfa  | .NDPKHVMYV | WMDALINYYS | SCF....ID  | .....      | .....EGKK   |
| clpel | .FDEKHVIYV | WIDALSNYIT | ALG....YG  | QEN.....   | .....QELYK  |
| clac  | .FDEKHVIYV | WIDALSNYIT | ALG....YG  | SDN.....   | .....DELYN  |
| liin  | .GNPKHVYV  | WIDALSNYIT | ALG....YN  | TDN.....   | .....DTKFQ  |
| limo  | .GNPKHVYV  | WIDALSNYIT | ALG....YN  | TDN.....   | .....DTKFQ  |
| baan1 | .GNPKHVIYV | WVDALSNYIT | ALG....YG  | TEN.....   | .....EEMYK  |
| bacel | .GNPKHVIYV | WVDALSNYIT | ALG....YG  | TEN.....   | .....EEMYK  |
| basu  | .ENPKHVYV  | WIDALFNLYT | ALG....YD  | TEN.....   | .....DELYQ  |
| bast  | .GDPKHVIYV | WIDALANYIT | ALG....YG  | TDN.....   | .....DEKFR  |
| baha  | .RDPKHVYV  | WIDALSNYIT | ALG....YG  | SDQ.....   | .....QEKYE  |
| enfa  | .NDPKHVYV  | WIDALSNYIT | ALG....YG  | SED.....   | .....DSLQ   |
| ocih  | .SNPKHVYV  | WIDALTNVIT | ALG....YG  | SED.....   | .....TSLYD  |
| stpy  | .SDPKHVYV  | WIDALLNYAT | ALG....YR  | QAN.....   | .....HANFD  |
| stpn  | .SNPKHVYV  | WIDALLNYAT | ALG....YA  | QDE.....   | .....HGNFD  |
| stmu  | .SNPKHVYV  | WIDALLNYAT | ALG....YG  | QDA.....   | .....HANFD  |
| lala  | .SNPKHVYV  | WFDALLNYIT | ALG....YN  | SDN.....   | .....DSNFK  |
| stau  | .SNPKHVYV  | WIDALVNYIS | ALG....YL  | SDD.....   | .....ESLFN  |
| oeoe  | .GDEKHVIYV | WIDALSNYIT | ALG....YD  | PELGDFD... | ...HQPELFK  |
| thma  | .DDPEHVIYV | WVDALINYIS | AIG....YG  | WND.....   | .....EMFN   |
| thth  | .WDENHVYV  | WFDALLNYVS | ALD....YP  | EGE.....   | .....AYR    |

|           |             |            |            |            |             |
|-----------|-------------|------------|------------|------------|-------------|
| dera      | .WDTDHVITYV | WFDALLSYLT | PLV.....SQ | GQD.....   | .....AS.    |
| stco      | .WDDKHVIYV  | WVDALLNYAT | AVG.....YN | ENP.....   | .....EKFE   |
| hepyj99   | .NDPKHVYV   | WLDALLNYAS | ALG.....YL | NGL.....   | .....DNKM   |
| hepy26695 | .NDPKHVYV   | WLDALLNYAS | ALG.....YL | NDL.....   | .....DNKM   |
| caje      | .NDDKHIIYV  | WLDALFIYVS | SLD.....FQ | NKG.....   | .....EN.A   |
| aqae      | .DPEHTIYV   | WFDALFNYIS | AL.....    | .E.....    | .....DKVE   |
| funu      | .FAPGHITYV  | WFDALTNYIT | SAG.....FE | NDE.....   | .....NKFD   |
| trrer     | .VDSSTIYV   | WFDALLGYVT | ALL.....DP | DSEPT..... | .....LENALS |
| sy6803    | .NDPNHTIYV  | WFDALLGYVT | ALL.....DE | DEEPN..... | .....LTNALV |
| arth_1    | .DDDKQTIYV  | WFDALLGYIS | ALT.....ED | NKQON..... | .....LETAVS |
| prma      | .DIDNHTFYV  | WFDALLGYVS | AIS.....LD | MKEPS..... | .....LDESID |
| caelmt    | .GDDSQTIYV  | WLDALVNYLT | VVG.....YP | DA.....    | .....DFK    |
| hosamt    | .GDDSQTIYV  | WLDALVNYLT | VIG.....YP | NA.....    | .....EFK    |
| tarumt    | .EDDGQTIYV  | WLDALVNYLT | VVG.....YP | N.....     | .....NHE    |
| drmemt    | .DDDSQTVYV  | WLDALVNYLS | SVG.....YP | DE.....    | .....KFS    |
| anga2     | .SDPSQSVYV  | WLDALVNYLT | VAG.....YP | KE.....    | .....SFR    |
| didimt    | .NDPSQTIYV  | WLDALTNYLT | VTG.....YP | NVS.P..... | ...N...SSQ  |
| caabmt    | .NDSTQKIYV  | WFDALLNYLT | AT.....KFP | HGF.E..... | ...VQDSKFFV |
| sacemt    | .NDPSQKVYV  | WFDALCNYLS | SIGGIPSILS | NAT.E..... | ...VVS RHYS |
| scpomt    | .GNSQQTIYV  | WLDALINYIS | VIG.....YP | WLN.E..... | ...K.SSLSA  |
| lema      | .GDERHCIYV  | WLDALFNYYT | GALTR..VAT | DGT.E..... | ...TLDEDHH  |
| myge      | .FDPNQTIYV  | WFDALFSYIT | NLG.....FR | .....      | ...NGDPNFI  |
| mypn      | .FDNKQTIYV  | WFDALFNYYT | NLG.....FA | .....      | ...HNDPKFN  |
| urur      | .ENPKHVIYV  | WLDALMNYLT | ATG.....YL | S.....     | ...NNEELFQ  |
| mypu      | .QSSKHVIYV  | WLDALFQYLT | NLG.....YG | S.....     | ...KNQSLYE  |

601

650

|       |        |             |            |             |             |
|-------|--------|-------------|------------|-------------|-------------|
| mask  | .....  | .....       | .....**    | *****       | *****.      |
| stpn2 | D..... | .FWNN.....  | .R..TKSYY  | VHGKDNIPFH  | TIIWPAILSG  |
| bace2 | E..... | .FWDR.....  | .E..AKTY   | VHGKDNIPFH  | SIIWPAVLLG  |
| baan2 | E..... | .FWDG.....  | .E..AKTY   | VHGKDNIPFH  | SVIWPAVLLG  |
| clpe2 | E..... | .YWNNE..... | .D..SRIYL  | VHGKENIPFH  | TTMFPAILSG  |
| deet  | K..... | .YWGG.....  | .D..TKSYY  | FIGKDNIPFH  | TIIWPAMLMG  |
| codi  | K..... | .WWNDP..... | .E..SSGY   | FMGKDNITFH  | SQIWP AELLG |
| thnw  | E..... | .YYMDP..... | .E..VRNYY  | FIGKDNIPFH  | AIWPAAMLMG  |
| thvo  | E..... | .FYFDK..... | .D..VKNY   | FIGKDNIPFH  | SIIWPAAMLLG |
| pogi  | T..... | .WWKSE..... | .D..TRLVH  | FIGKDNIVFH  | CIVFPAML..  |
| bafr  | T..... | .WWKDP..... | .E..TRLVH  | FIGKDNIVFH  | CIVFPAML..  |
| cyhu  | D..... | .FWKKD..... | .D..TKLVH  | FIGKDNIVFH  | CIIFPAML..  |
| chte  | R..... | .YWQDP..... | .E..TRIIN  | FIGKDNVVFH  | TLMFPAILMA  |
| chmu  | K..... | .FWLDD..... | .K..VTYTQ  | FVGKDNVTSFH | SVIFPAMEMG  |
| chtr  | K..... | .FWLDD..... | .T..VTYAQ  | FIGKDNVTSFH | AAIFPAMEIG  |
| chpn  | R..... | .FWLED..... | .G..VEYVQ  | FIGKDNLPFH  | SVVFPAMELG  |
| fugu  | K..... | .WWKN.....  | PPQ..VELYN | FMAKDNVPFH  | SVVFP CSLLG |
| hosa  | R..... | .WWKN.....  | PEQ..VDLYQ | FMAKDNVPFH  | SLVFP CSALG |
| anga  | Q..... | .WWQPDTANT  | GVK..VDLYQ | FMAKDNVPFH  | SVMFPASLLA  |
| drme  | Q..... | .WWQP...AK  | GTD..VELFQ | FMAKDNVPFH  | SVVWPSVLLA  |
| sace  | Q..... | .WWNN.....  | PEH..VSLYQ | FMGKDNVPFH  | TVVFP GSQLG |
| scpo  | K..... | .WWRN.....  | PEQ..VKLYQ | FMGKDNVPFH  | TVIFP SLLG  |
| didi  | K..... | .WWKN.....  | PEN..VKLVK | LMGKDNVHFN  | KVIFPASLIG  |
| arth  | K..... | .WWKN.....  | PEN..VELYQ | FMGKDNVPFH  | TVMFPSTQLG  |
| orsa  | K..... | .WWKD.....  | PDN..VELFQ | FMGKDNVPFH  | TVMFPSTLLG  |

|       |        |             |            |            |            |
|-------|--------|-------------|------------|------------|------------|
| cael  | K..... | .WWKN.....  | PEN..VELFN | FVGKDNVAFH | AVMFPCSQLG |
| encu  | E..... | .WCKD.....  | .....AELVQ | FMGKDNVAFH | TVIFPAMLYA |
| trde  | A..... | .WWLD.....  | QND..VELFQ | FIGKDNIPFH | TVIFPCSLIG |
| trpa  | S..... | .WWLD.....  | QQD..VELVQ | FVGKDNIPFH | TLFFPCMLIG |
| bobu  | S..... | .WWKN.....  | NDQ..VNLVQ | FIGKDNILFH | TIIFPCIEIG |
| cacr  | R..... | .WWRTDAG..  | ADD..VRYVQ | FMGKDNVAFH | TVSFPATILG |
| suto  | K..... | .FWFG.....  | .ND..VKSYY | FIGKDNIPFH | AVILPAMLMA |
| suso  | E..... | .YWFG.....  | .PN..IKSYY | FIGKDNIPFH | AVILPAMLMA |
| aepe  | S..... | .WWWD.....  | .SG..TRTVY | FIGKDNIPFH | AIILPALFLA |
| pyba  | R..... | .FWLD.....  | .PE..TKVVF | FVGKDNVPFH | VIILPALLLA |
| pyho  | K..... | .YWLNI..... | ..DSETRVIH | FIGKDNIPFH | AIFWPAFLMA |
| pyab  | K..... | .YWLNI..... | ..DGQTRVIH | FIGKDNIPFH | AIFWPAFLMA |
| pyfu  | K..... | .YWLNL..... | ..DGQTRVIH | FIGKDNIPFH | AIFWPAFLMA |
| meja  | K..... | .YWLEK..... | ..D..TKIYH | FIGKDITVHH | AVFWPGMLIA |
| meth  | E..... | .YW.....    | ..D..SGAIH | FIGKDIIYHH | AIFWPALLMA |
| arfu  | K..... | .IWIDG..... | ..D..AEIIH | FIGLDIVYHH | CIFWPAMLKG |
| hanrc | S..... | .VWKDG..... | ..D..GEIIH | VIGRDIIQHH | TVFWPSMLAG |
| psfl  | A..... | .FWGK.....  | .DST.AELYH | FIGKDIVNFH | ALFWPAMLEG |
| psae  | A..... | .FWGK.....  | .DSG.AELYH | FIGKDIVNFH | ALFCPAMLEG |
| esco  | E..... | .YWKK.....  | .DST.AELYH | FIGKDIVYFH | SLFWPAMLEG |
| saty  | E..... | .YWKK.....  | .DSD.AELYH | FIGKDIVYFH | SLFWPAMLEG |
| yepe  | E..... | .FWGK.....  | .DXK.TDXYX | FIGKDIVYFH | SLFWPAMLEG |
| vich  | E..... | .YWNK.....  | .DSK.TELYH | FIGKDIVYFH | SLFWPAMLDG |
| haein | E..... | .FWAE.....  | .GSD.AELYH | FIGKDIVYFH | SLFWPAMLEG |
| acac  | G..... | .FWRK.....  | .DSD.AELYH | FIGKDIMYFH | SLFWPAMLEG |
| pamu  | D..... | .FWKK.....  | .DSS.AELYH | FIGKDIVYFH | SLFWPAMLDG |
| neme  | E..... | .YFKA.....  | .DSQ.TEMYH | FIGKDILYFH | ALFWPAMLHF |
| nogo  | E..... | .YFKA.....  | .DSQ.TEMYH | FIGKDILYFH | ALFWPAMLHF |
| xyfa  | T..... | .HLRS.....  | .GTT.TELHH | FIGKDIVNFH | ALFWPAVLHG |
| buAPS | E..... | .LWNQ.....  | .NSN.YELYH | FIGKDIIYFH | TLFWPAILEA |
| sime  | K..... | .FWPAN..... | .....IH    | VIGKDIIRFH | AVYWPAFLMS |
| agtu  | K..... | .YWPAD..... | .....VH    | IIGKDIIRFH | AVYWPAFLMS |
| brsu  | A..... | .YWPAN..... | .....AH    | IIGKDISRFH | AVYWPAFLMS |
| melo  | R..... | .YWPA.....  | .....TH    | IIGKDIVRFH | AVYWPAFLMS |
| rhpa  | H..... | .YWPAD..... | .....VH    | VIGKDIIRFH | AVYWPAFLMS |
| mytu  | R..... | .YWPAD..... | .....LH    | MIGKDIIRFH | AVYWPAFLMS |
| rhru  | R..... | .YWPAN..... | .....LH    | MVGKDILRFH | TVYWPAFLMA |
| noar  | K..... | .YWPAN..... | .....LH    | LIGKDIVRFH | TVYWPAFLMS |
| rico  | K..... | .FWPAD..... | .....LH    | VVGKDILRFH | AVYWPAFLMA |
| ripr  | K..... | .FWPAN..... | .....LQ    | IVGKDILRFH | AVYWPAFLMA |
| plyo  | K..... | .YWPAD..... | .....IH    | IIGKDIVWFH | AVIFPTILMS |
| plfa  | K..... | .YWPAN..... | .....VH    | IIGKDITWFH | TVIFPTILLS |
| clpel | K..... | .FWPAD..... | .....VH    | LIGKDILRFH | TIYWPIMLMA |
| clac  | K..... | .FWPAD..... | .....LH    | LVGKDIIRFH | TIYWPIMLMA |
| liin  | K..... | .YWPAD..... | .....VQ    | IVGKEIVRFH | TIYWPIMLMA |
| limo  | K..... | .YWPAD..... | .....VQ    | IVGKEIVRFH | TIYWPIMLMA |
| baan1 | K..... | .FWPAD..... | .....VH    | LVGKEIVRFH | TIYWPIILMA |
| bacel | K..... | .FWPAD..... | .....VH    | LVGKEIVRFH | TIYWPIILMA |
| basu  | K..... | .YWPAD..... | .....VH    | LVGKEIVRFH | TIYWPIMLMA |
| bast  | K..... | .YWPAD..... | .....VH    | LVGKEIVRFH | TIYWPIMLMA |
| baha  | N..... | .YWPAD..... | .....VH    | LVGKEIVRFH | TIYWPIMLMA |
| enfa  | K..... | .YWPAN..... | .....VQ    | MVGKEIVRFH | TIYWPIMLMA |

|           |            |            |            |            |            |
|-----------|------------|------------|------------|------------|------------|
| ocih      | K.....     | .FWPAD.... | .....VH    | MVGKEIVRFH | TIYWPIMLMA |
| stpy      | K.....     | .FWNGTV... | .....FH    | MVGKDILRFH | SIYWPILLMM |
| stpn      | K.....     | .FWNGTV... | .....FH    | MVGKDILRFH | SIYWPILLMM |
| stmu      | K.....     | .FWNGTV... | .....FH    | MVGKDILRFH | SIYWPILLMM |
| lala      | K.....     | .YWPG..... | .....IN    | MVGKEIVRFH | TIYWPIMLHA |
| stau      | K.....     | .YWPAD.... | .....IH    | LMAKEIVRFH | SIIWPILLMA |
| oeoe      | K.....     | .FWPAN.... | .....LQ    | LVGKEIVRFH | TIYWPIMLHA |
| thma      | K.....     | .WWPAD.... | .....LH    | LIGKEINRFH | SIIWPAMLS  |
| thth      | T.....     | .FWPHA.... | .....WH    | LIGKDILKPH | AVFWPTMLKA |
| dera      | .....      | .MSGKA.... | .....WH    | VIGKDILKPH | AVFWPTMLRA |
| stco      | S.....     | .TFPAD.... | .....VH    | LVGKDILRFH | AIIWPAFLMS |
| hepyj99   | A.....     | .HFERA.... | .....RH    | IVGKDILRFH | AIYWPFLMS  |
| hepy26695 | A.....     | .HFECA.... | .....RH    | IVGKDILRFH | AIYWPFLMS  |
| caje      | K.....     | .FWPAH.... | .....VH    | LVGKDILRFH | AIYWPFLMS  |
| aqae      | I.....     | .YWPAD.... | .....LH    | LVGKDILRFH | TVYWPFLMS  |
| funu      | K.....     | .FWNNSR... | .....VVH   | LIGKDIIRFH | AIIWPCMLLS |
| trrer     | K.....     | .WWPIN.... | .....LH    | LIGKDILRFH | AVYWPAMLS  |
| sy6803    | K.....     | .WWPIN.... | .....LH    | LIGKDILRFH | AVYWPAMLS  |
| arth_1    | F.....     | .GWPAS.... | .....LH    | LIGKDILRFH | AVYWPAMLS  |
| prma      | N.....     | .GWPAD.... | .....IH    | LIGKDILRFH | AVYWPAMLS  |
| caelmt    | S.....     | .WWPAT.... | .....SH    | IIGKDILKFH | AIYWPALLLG |
| hosamt    | S.....     | .WWPAT.... | .....SH    | IIGKDILKFH | AIYWPALLLG |
| tarumt    | R.....     | .WWNVA.... | .....HH    | IIGKDILKFH | AIYWPSFLLG |
| drmemt    | A.....     | .HWPPA.... | .....QQ    | VIGKDILKFH | GIYWTAFLLA |
| anga2     | T.....     | .RWPPT.... | .....VQ    | VLGKDILKFH | GIYWPALLA  |
| didimt    | S.....     | .HWSNA.... | .....TH    | IIGKDIKFH  | SVYWPSFLIA |
| caabmt    | T.....PEN  | SIWPA....  | .....TH    | VIGKDIIRFH | CIYWPIFLMA |
| sacemt    | DKSNVKGQLL | IPYPKEV... | ....QRNTIH | VIGKDIKFH  | TVYWPSFLLA |
| scpomt    | G.....     | ..WPAN.... | .....MH    | VIGKDIIRFH | CIYWPFLMA  |
| lema      | ALN.....   | .RWPAD.... | .....VH    | VVGKDILKFH | AIYWPFLMS  |
| myge      | K.....     | .WWNNDNK.. | ....EREVIH | LISREITRFH | CIYWPIFLHL |
| mypn      | K.....     | .WWNNNDE.. | ....EHEVIH | LISREITRFH | CIYWPIFLHQ |
| urur      | K.....     | .YWCDN.... | ....ETEIVH | LLSKEIARFH | CIYWPIFLND |
| mypu      | K.....     | .FWKNG.... | .....DERVH | VVGKEITRFH | CIYWPIFLKS |

651

700

|       |            |            |            |            |            |
|-------|------------|------------|------------|------------|------------|
| mask  | .....      | .....*     | *****      | *.....     | *****      |
| stpn2 | .....      | ...LEIEPLP | EYIISSEYLT | L.ENKKISTS | NNWAIWLNDI |
| bace2 | .....      | ...IGEGTIP | RHIVSNEYLT | V.EKRKLSTS | KNWAVVVPDI |
| baan2 | .....      | ...IGEGTIP | RHIVSNEYLT | V.EKRKLSTS | KNWAVVVPDI |
| clpe2 | .....      | ...IGLEKSE | IRIFSSQYLT | L.EGKTFSTN | RNWAIWVPYI |
| deet  | RGG.....   | .....LDLP  | YDVPSNEYLT | I.EAQKFSKS | RNKAIWVDDV |
| codi  | YQGKGAKAGS | VHSLGELNLP | TEVVSSEFLT | M.SGSKFSSS | KGIVYVKDF  |
| thnw  | YGG.....   | .....FNLP  | YDIPANEYLT | F.KGQQFSKS | RGIGYSVDDL |
| thvo  | YGE.....   | .....LNLP  | YDIPANEYLT | F.KGEQFSKS | RGIGYTVDEL |
| pogi  | .....      | .RAEGSFILP | DNVPANEFLN | L.EGDKISTS | RNWAVWLHEY |
| bafr  | .....      | .KAEGSYILP | DNVPSNEFLN | L.EGDKISTS | RNWAVWLHEY |
| cyhu  | .....      | .KAEGSYILP | DNVPANEFMN | L.EGDKISTS | RNWAVWLHEY |
| chte  | WNEG.....  | .RSEGRYELA | DNVPASEFMN | F.EGRKFSKS | RNYAVYLGEF |
| chmu  | .....      | ..QSLPYKKV | DALVTSEFLL | L.EGFQFSKS | EGNIIDMDAF |
| chtr  | .....      | ..QSLPYKKV | DALVTSEFLL | L.EGFQFSKS | DGNFIDMDAF |
| chpn  | .....      | ..QKLDYKKV | DALVVSEFYL | L.EGRQFSKS | EGNYVDMDF  |

|       |           |             |            |            |            |
|-------|-----------|-------------|------------|------------|------------|
| fugu  | .....     | ..AQDNYTLV  | NHLVATEYLN | Y.EDTKFSKS | RGVGVFGDMA |
| hosa  | .....     | ..AEDNYTLV  | SHLIATEYLN | Y.EDGKFSKS | RGVGVFGDMA |
| anga  | .....     | ..VDKGYTLV  | SHVMATEYLN | Y.EDGKFSKS | RGIGVFGNDA |
| drme  | .....     | ..INKGHTLV  | SHIMATEYLN | Y.EDGKFSKS | RGIGVFGNDA |
| sace  | .....     | ..TEENWTML  | HHLNTTEYLQ | Y.ENGKFSKS | RGVGVFGNNA |
| scpo  | .....     | ..TGEKWTML  | HHINTTDYLN | Y.ETGKFSKS | RGVGVFGNTA |
| didi  | .....     | ..SKDNYTLL  | NNLSATEFLN | Y.ETGKFSKS | RNTGVFGDGA |
| arth  | .....     | ..TEENWTLM  | KTISVTEYLN | Y.EDGKFSKS | KGVGVFGNDV |
| orsa  | .....     | ..TGEKWTMM  | KTISVTEYLN | Y.EAGKFSKS | HGIGVFGNDA |
| cael  | .....     | ..ANDNYTVV  | NNLCATEYLN | Y.EDTKFSKS | RGTGIFGDAA |
| encu  | .....     | ..TGEKYPVV  | RRLSATEYLQ | F.ENEKFSKS | RRHGIFGLDL |
| trde  | .....     | ..SGKNWTKL  | FHMSGTEYLN | Y.ENGKFSKS | KGVGVFGNDA |
| trpa  | .....     | ..SGQRWTML  | TRLSATEYLN | Y.EGGKFSKS | LGVGVFGSDA |
| bobu  | .....     | ..SEENWTIL  | NQLSSSEYLN | Y.ENLKFSKS | EGTGIFGNDA |
| cacr  | .....     | ..SEEPWKS   | DMLKAFNWLN | W.YGGKFSTS | NKRGVFMDDA |
| suto  | .....     | ..SGENYVLP  | TVIAATEYLL | Y.EGQKFSKS | RKIGVWIDEA |
| suso  | .....     | ..SEEEYHLP  | DVIAATEYLL | Y.EGQKFSKS | RKIGVWIDEA |
| aepe  | .....     | ..SHDPYVLP  | WRISATEYLM | Y.EGQQFSKS | RRIGVWIDEA |
| pyba  | .....     | ..NGGGYVMP  | TTTASTEYLL | Y.EGDKFSKS | RRWGVWIDEA |
| pyho  | YGKY...KD | EEVEAEWNLP  | YDIPANEYLT | L.EGKKFSTS | RNWAIVVHE. |
| pyab  | YGKY...KD | EEVEAEWNLP  | YDIPANEYLT | L.EGKKFSTS | RNWAIVVHE. |
| pyfu  | YGKY...KD | EEVEAEWNLP  | YDIPANEYLT | L.EGKKFSTS | RNWAIVIHE. |
| meja  | HG.....   | .....SFNLP  | TAVVSGGYLT | L.EGRKMSTS | KRWVWVKD.  |
| meth  | YG.....   | .....CRTP   | ANIIAGEYLS | L.EGQKMSTS | KNWVWVWTS. |
| arfu  | AD.....   | .....YALP   | SAVVASGMVK | V.EGKTFSTS | RGYVWVVEED |
| hanrc | AD.....   | .....YAEP   | RAVCATGFVN | I.DGRGLSTS | KNRAIWAAE. |
| psfl  | .....     | .....AGFRKP | TGINVHGYLE | V.NGQKMSKS | RGTFIKARTY |
| psae  | .....     | .....AGYRKP | TALNVHGYLE | V.NGQKMSKS | RGTFVKARTY |
| esco  | .....     | .....SNFRKP | SNLNVHGYLE | V.NGAKMSKS | RGTFIKASTW |
| saty  | .....     | .....SHFRKP | TNLNVHGYLE | V.NGAKMSKS | RGTFIKASTW |
| yepe  | .....     | .....SNFRKP | TNLNVHGYLE | V.NGAKMSKS | RGTFIKAGTY |
| vich  | .....     | .....SGFRKP | TNVFVHGYLE | V.NGAKMSKS | KGTFVKASTY |
| haein | .....     | .....SGYRKP | TNVFAHGYLE | V.DGAKMSKS | RGTFIQASTY |
| acac  | .....     | .....ADFRKP | SNLNVHGYLE | V.NGKMSKS  | RGTFIQAATY |
| pamu  | .....     | .....CDLRKP | TNVFAHGYLE | V.NGVKMSKS | RGTFIQASTY |
| neme  | .....     | .....SGHRAP | TGVYAHGFLT | V.DGQKMSKS | RGTFITAKSY |
| nogo  | .....     | .....SGHRAP | TGVYAHGFLT | V.DGQKMSKS | RGTFITAKSY |
| xyfa  | .....     | .....TGHRAP | TRLNVHGYLE | V.DGAKMSKS | RGTFIMARTY |
| buAPS | .....     | .....VSFRQP | SGIFVHGHLT | M.NGLKLSKS | RGALIKASDW |
| sime  | .....     | .....AGLPLP | KRVFAHGFL  | N.KGEKMSKS | LGNVVDPFNL |
| agtu  | .....     | .....AKLPLP | KRVYAHGFL  | N.KGEKMSKS | LGNVVDPANL |
| brsu  | .....     | .....AQLPLP | KRVFAHGFL  | N.RGEKMSKS | VGNVIDPFEL |
| melo  | .....     | .....AGIELP | KRVFAHGFL  | N.RGEKMSKS | VGNVDPFAL  |
| rhpa  | .....     | .....AGIPVQ | KRVYAHGFL  | N.KGEKMSKS | VGNIVDPFNL |
| mytu  | .....     | .....AGIELP | RRIFAHGFL  | N.RGEKMSKS | VGNIVDPVAL |
| rhru  | .....     | .....AGLEVP | GRVFAHGWT  | N.EGQKISKS | VGNVIDPRAL |
| noar  | .....     | .....ADIALP | RQVFGHGFL  | N.RGQKESKS | LGNTIDPLDL |
| rico  | .....     | .....AEVPLP | KTIMAHGWT  | N.EGQKISKS | LGNTIDPIKL |
| ripr  | .....     | .....AEIPLP | KAIMVHGWT  | N.EGQKISKS | LGNTIDPITL |
| plyo  | .....     | .....ANIPLP | KCVFVSHGFL | AGDGKMSKS  | LKNVIDPKEI |
| plfa  | .....     | .....ANIPLS | KSVFVSHGFL | AADGKMSKS  | LGNVINPLEI |
| clpel | .....     | .....LGLELP | KQVFGHGWLL | VDGG.KMSKS | KGNVVDPVVL |



|           |       |            |            |             |            |
|-----------|-------|------------|------------|-------------|------------|
| clac      | ..... | ....LDLPLP | KQVFGHGWLL | VDGG.KMSKS  | KGNVDPVVL  |
| liin      | ..... | ....LDLPLP | KMVFGHWIL  | MKDG.KMSKS  | KGNVDPYML  |
| limo      | ..... | ....LDLPLP | KMVFGHWIL  | MKDG.KMSKS  | KGNVDPYML  |
| baan1     | ..... | ....LDLPLP | KKVFAHWIL  | MKDG.KMSKS  | KGNVDPVIL  |
| bacel     | ..... | ....LDLPLP | KKVFAHWIL  | MKDG.KMSKS  | KGNVDPVTL  |
| basu      | ..... | ....LDLPLP | KQVFAHWLL  | MKDG.KMSKS  | KGNVDPVTL  |
| bast      | ..... | ....LGLPLP | KKVFGHGWLL | MKDG.KMSKS  | KGNVDPVMI  |
| baha      | ..... | ....LDLPLP | KKVFGHGWLL | MKDG.KMSKS  | KGNVDPVPL  |
| enfa      | ..... | ....LDLPLP | KKVFGHGWLL | MKDG.KMSKS  | KGNVYPEML  |
| ocih      | ..... | ....LDLPLP | KKVFAHWLL  | MKDG.KMSKS  | KGNVYPEML  |
| stpy      | ..... | ....LDLPMP | DRLIAHGFV  | MKDG.KMSKS  | KGNVYPEML  |
| stpn      | ..... | ....LDVKLP | DRLIAHGFV  | MKDG.KMSKS  | KGNVYPEML  |
| stmu      | ..... | ....LDLKMP | ERLIAHGFV  | MKDG.KMSKS  | KGNVYPEML  |
| lala      | ..... | ....LGLPAP | KKIFAHWLL  | MKDG.KMSKS  | KGNVYPEML  |
| stau      | ..... | ....LDLPLP | KKVFAHWIL  | MKDG.KMSKS  | KGNVDPNIL  |
| oeoe      | ..... | ....LGLPLP | GEVLGHGWL  | MKNG.KMSKS  | KGNVYPETL  |
| thma      | ..... | ....VGLPLP | KKVFAHWLT  | VNGQ.KISKS  | LGNAIDPRFF |
| thth      | ..... | ....AGIPMY | RHLNVGGFLL | GPDGRKMSKT  | LGNVDPFAL  |
| dera      | ..... | ....AGLPLY | RRLVVHSHIL | AEDGRKMGKS  | LGNAIDPEEL |
| stco      | ..... | ....QGLPLP | GKIAANGWLM | V.GGEKMSKS  | NLTGIKPQDL |
| hepyj99   | ..... | ....LNLPLF | KQLCVHGWWT | I.EGVKMSKS  | LGNVLDAQKL |
| hepy26695 | ..... | ....LNLPLF | KQLCVHGWWT | I.EGVKMSKS  | LGNVLDAQKI |
| caje      | ..... | ....VDLPLP | KFIGAHGWWT | K.EGEKMSKS  | KGNVVKPKEV |
| aqae      | ..... | ....LGYELP | KKVFAHWWT  | V.EGKKMSKT  | LGNVDPYEV  |
| funu      | ..... | ....AGIKLP | DSIVAHWWT  | S.EGEKMSKS  | RGNVNPYDE  |
| trrer     | ..... | ....ADLPLP | ERVFGHGFLT | K.DGKKMGKS  | LNNTLDPFEL |
| sy6803    | ..... | ....AELAIP | AQVFGHGFLT | K.DGQKMGKS  | LGNTVDPLDL |
| arth_1    | ..... | ....AGLELP | KMVFGHGFLT | K.DGMKMGKS  | LGNTLEPFEL |
| prma      | ..... | ....AGMKVP | KKVYGHGFLT | R.EGQKMGKS  | LGNVLDPDIL |
| caelmt    | ..... | ....AGLRPP | HRIYVHSHWT | V.SGQKMSKS  | LGNVDPRTC  |
| hosamt    | ..... | ....AGMSPP | QRICVHSHWT | V.CGQKMSKS  | LGNVDPRTC  |
| tarumt    | ..... | ....AGLPLP | QTIHVHSHWT | V.AGKKMSKS  | LGNVDPQER  |
| drmemt    | ..... | ....AGLEPP | GQLYVHSHWT | V.DGQKMSKS  | KHNVDPLOA  |
| anga2     | ..... | ....AQIEPP | RQLLVHSHWT | V.DNQKMSKS  | KQNVDPNER  |
| didimt    | ..... | ....ADYPLP | KSIICAHWT  | V.NREKMSKS  | RGNVDPFLA  |
| caabmt    | ..... | ....AGIELP | KQVIVHSHWL | C.DGFKMSKS  | LGNLVDPMEI |
| sacemt    | ..... | ....AGLPLP | RQIVVGHHL  | C.NGMKMSKS  | LGNVDPIDM  |
| scpomt    | ..... | ....AGLPLP | EKILVHSHWT | M.NKVKMSKS  | LGNVDPFWL  |
| lema      | ..... | ....AELPLP | ERLVSHGWWT | K.DHKKISKS  | LGNAFDPVEK |
| myge      | ..... | ....LDIKLP | TQFLSHGWIV | DGEGRKMSKS  | LNNVISPEQL |
| mypn      | ..... | ....LGFKLP | TQFLSHGWIV | DGNHGMKMSKS | LGNVISPEEL |
| urur      | ..... | ....LQIRFP | STILSHGWII | TKEG.KMSKS  | LGNVDPNVL  |
| mypu      | ..... | ....LNVKMP | TKIISHGWIV | TPEG.KMSKS  | KGNVDPVVL  |

701

750

|       |            |            |            |            |            |
|-------|------------|------------|------------|------------|------------|
| mask  | .....**    | *****      | *****      | *****      | *****      |
| stpn2 | IKKYDA..DS | IRYFLTINAP | EMK.DANFSW | REFIYSHNSE | LLGSYGNFIN |
| bace2 | LERYDP..DS | IRYFLTVNAP | ENR.DTDFSW | REFIYSHNSE | LLGAYGNFVN |
| baan2 | LERYDP..DS | IRYFLIVNAP | ENR.DTDFSW | REFIYSHNSE | LLGAYGNFVN |
| clpe2 | MERYNI..DS | IRYYLISRGA | EEK.NSDFTW | RDFINANNNE | LVGEIGNFTN |
| deet  | LSRYS..VDT | LRYLLSANMP | ESS.DMDFSW | REFVRRNDE  | LVATYGNLAQ |
| codi  | LKEFG..ADP | LRYFIAVAGP | ENN.DTDFTW | DEFVRRVNNE | LANGWGNLVN |

|       |             |             |            |            |            |
|-------|-------------|-------------|------------|------------|------------|
| thnw  | LKAVP..ADY  | LRYVVASILP  | ETG.DSDFSL | EELVNTVNSD | LIDKYGNLVY |
| thvo  | LRVIP..PDY  | LRYVVASILP  | ETG.DSDFSL | EELVKTVNSD | LIDKYGNFVH |
| pogi  | LEEFPGKQDV  | LRYVLTANAP  | ETK.DNDFTW | RDFQARNNNE | LVAIFGNFVN |
| bafr  | LEDFPGKQDV  | LRYVLTANAP  | ETK.DNDFTW | KDFQARNNNE | LVAVYGNFVN |
| cyhu  | LEEFKGGKQDV | LRYALCANAP  | ETK.DNDFTW | RDFQARNNNE | LVAIYGNFVN |
| chte  | LERFP..ADT  | LRYSIAMNYP  | ENK.DTDFSW | SDFQNRNNGE | LADTLGNFIK |
| chmu  | LETYS..LDK  | LRYVLAAIAP  | ETS.DSEFAF | QEFKTRCNSE | LVGKFGNFVN |
| chtr  | LETYS..LDK  | LRYVLAAIAP  | ETS.DSEFSF | QEFKTRCNSE | LVGKYGNFVN |
| chpn  | LSSYS..LDK  | LRYVLAATAP  | ETS.DSEFTF | LDFKTRCNSE | LVGKFGNFVN |
| fugu  | KETDIP.CDV  | WRFYLLYVRP  | EGQ.DSSFSW | ADLATKNNSE | LLNNLGNFIN |
| hosa  | QDTGIP.ADI  | WRFYLLYIRP  | EGQ.DSAFSW | TDLLLKNNSE | LLNNLGNFIN |
| anga  | QDTGIP.ADV  | WRFYLGAAAP  | EGQ.DSSFSW | SDLQARNNNE | LLKNLGNFFN |
| drme  | QETGIP.ADV  | WRFYLASARP  | EGQ.DSSFSW | NDLAARNNNE | LLNNLGNFVN |
| sace  | QDSGIS.PSV  | WRYYLASVRP  | ESS.DSHFSW | DDFVARNNSE | LLANLGNFVN |
| scpo  | QDIGLS.PSV  | WRYYLLSSRP  | ETS.DTMFTW | KEFITRHNSE | LLANLGNFVN |
| didi  | KATGIP.SEV  | WRFYLLNNRP  | ESS.DSIFSW | DDFNFKNN.E | LLNNFGNLVN |
| arth  | KDTNIP.VEV  | WRYYLLTNRP  | EVS.DTSFSW | TDLQAKLNSE | LLSNLGNFVN |
| orsa  | KDTNIP.PEV  | WRYYLLTNRP  | EVS.DTLFTW | ADLQAKLNSE | LLNNLGNFIN |
| cael  | QGTEIP.ADI  | WRFYLLYMRP  | ESQ.DTAFSW | DDFVLKVNSE | LLNNLGNFIN |
| encu  | VGGGLGKSCM  | WRYYLLKIRP  | ESTKDSNFTF | SDFRQSVTAD | LINNLGNFVN |
| trde  | KESGIP.ADM  | WRFYIFYNRP  | EKN.DTQFTW | KDFQERVNSE | LIGNLGNLVN |
| trpa  | KESGIP.SDL  | WRFYLLYHRP  | EKS.DAHFTW | HEFQERVNSE | LIGNLGNLVN |
| bobu  | ITTGIP.SDI  | WRFYIYNNRP  | EKS.DFQFMW | QDLMERVNTE | LIDNFSNLVN |
| cacr  | LEILPP..DL  | WRWYLTANSP  | EGS.DTAFWT | EQFASAVNRD | LADVLGNFVN |
| suto  | PQLLDI..EY  | WRFILIRLRP  | EER.DTNFTW | REALRIVNTE | LNDDIGNYAN |
| suso  | PELMDV..EY  | WRFVLIRLRP  | EEK.DTNFTW | RETVRIVNTE | LNDDIGNYVN |
| aepe  | LEIAPA..DY  | WRWALARMRP  | EAR.DTNFTW | KEYRIVNTE  | LNDDIGNFVN |
| pyba  | LQLLPA..DY  | WRFVLIYIRP  | ENR.DTNFSW | STALEIINKV | LNDDVGNYAN |
| pyho  | FLDV.FPADY  | LRYYLTTIMP  | ETR.DSDFSF | AEFKTRINEE | LVNNLGNFVH |
| pyab  | FLDV.FPADY  | LRYYLTTIMP  | ETR.DSDFSF | SDFKVRINEE | LVNNLGNFVH |
| pyfu  | FLDV.FPADY  | LRYYLTSIMP  | ETR.DSDFSF | AEFKTKINEE | LVNVLGNFVY |
| meja  | FVKN.FDADY  | LRYYLIMSAP  | LFK.DCDFSF | DDFKNKINNE | LINIIGNFTH |
| meth  | FLER.FDRDL  | LRYYLTVNAP  | LTR.DTDFSW | DDFQRRVNDE | LADVLGNFLH |
| arfu  | YLKSGLSPDY  | LRYYIVNYTS  | HQK.DLNFSW | EVFREKVNNE | VIATLGNFLY |
| hanrc | YLDAGFHPDL  | LRYYLATASG  | FER.DVNFSW | AEFAQRVNTE | LADAVGNFAY |
| psfl  | LDH..LSPEY  | LRYYYAAKLG  | RGVDDLNL   | EDFVQKVNSD | LVGKVVNIAS |
| psae  | LDH..LDPEY  | LRYYYASKLG  | RGVEDLNL   | EDFVQKVNSD | LVGKVVNIAS |
| esco  | LNH..FDADS  | LRYYYTAKLS  | SRIDDIDLNL | EDFVQRVNAD | IVNKVVNLAS |
| saty  | LKH..FDADS  | LRYYYTAKLS  | SRIDDIDLNL | EDFVQRVNAD | IVNKVVNLAS |
| yepe  | LKY..LDADC  | LRYYYAAKLS  | SRIDDIDLNL | EDXVQRVNAD | IVNKVVNLAS |
| vich  | LNH..LDPEC  | LRYYYAAKLN  | NRIDDIDLNL | EDFTQRVNAD | VVNKIVNLAS |
| haein | LNH..IDPEC  | LRYYYAAKLN  | DRIEDLDFNL | EDFVQRVNTD | IVNKLVNLAS |
| acac  | LKY..LDPEC  | LRYYYAAKLS  | NRIDDIDLNL | EDFVQRVNTD | LVNKLVNLAS |
| pamu  | LRH..LAPEY  | LRYYYAAKLN  | NRIEDLDFNL | EDFVQRLNAD | VVNKFVNLAS |
| neme  | LEQG.LNPEW  | MRYYYIAAKLN | SKIEDIDLNL | QDFISRVNSD | LVGKYVNIAA |
| nogo  | LEQG.LNPEW  | MRYYYIAAKLN | GKIEDIDLNL | QDFISRVNSD | LVGKYVNIAA |
| xyfa  | LDAG.LEPDA  | LRYYYFAAKSS | GDVDDLNL   | SDFVARVNAD | LVGKLVNLAS |
| buAPS | IQY..FSDSD  | LRYYYASKLS  | NKTHDIEINL | EDFIQKINS  | IVNKLVNLAA |
| sime  | VEHFG..DQ   | IRYFFLREVS  | FGQ.DGSYSE | EGIATRINS  | LANGIGNLAS |
| agtu  | VAHFG..DP   | VRYFFMREVS  | FGQ.DGSYSE | EGIATRINAD | LANGIGNLAS |
| brsu  | VERYGL..DQ  | LRYFLMREVP  | FGQ.DGSYSH | EAIVNRTNAD | LANDLGNLAQ |
| melo  | IEHYGL..DQ  | VRYFFLREVP  | FGQ.DGSYSH | DAIVNRTNAD | LANGLGNLAQ |

|           |             |            |            |             |            |
|-----------|-------------|------------|------------|-------------|------------|
| rhpa      | ADQYGV..DQ  | VRYFFLREVP | FGS.DGSYNH | EAIVNRINAD  | LANDLGNLAQ |
| mytu      | AEALGV..DQ  | VRYFLLREVP | FGQ.DGSYSD | EAIVTRINTD  | LANELGNLAQ |
| rhru      | IETYGL..DP  | VRYFLLREVP | FGN.DGDFSH | RAMINRMNGE  | LANDLGNLAQ |
| noar      | ADRFV..DP   | LRYFLMREVA | FGQ.DGSYSA | EAIVTRCNAE  | LANSYGNLVQ |
| rico      | IDIEFGV..DQ | VRYFLMREVT | FGA.DGNFAR | SNLITRINSE  | LSNKIGNLLQ |
| ripr      | IDIEFGV..DQ | VRYFLMREVI | FGA.DANFAR | NNLITRINSE  | LSNKIGNLLH |
| plyo      | IESYGS..DA  | FRFHVVKESK | RGY.DMRFDV | DNLVDMCNSD  | LADTIGNLVQ |
| plfa      | IDKYGA..DA  | FRYHVIKETK | RGC.DTRFDV | DNLVDMCNSD  | LADTIGNLVQ |
| clpel     | VNMFGA..DA  | VRYLLREIP  | FGS.DGLFNN | EIIFIKKINTD | LANDLGNLLS |
| clac      | INEFGT..DP  | VRYLLHEIP  | FGS.DGLFNN | EIIFIKKINS  | LANDLGNLVS |
| liin      | IDRYGL..DA  | LRYLLREVP  | FGS.DGLFTP | EDFVDRVNYD  | LANDLGNLLN |
| limo      | IDRYGL..DA  | LRYLLREVP  | FGS.DGLFTP | EDFVDRVNFD  | LANDLGNLLN |
| baan1     | IDRYGL..DA  | LRYLLREVP  | FGS.DGVFTP | EGFVERINF   | LANDLGNLLN |
| bacel     | IDRYGL..DA  | LRYLLREVP  | FGS.DGVFTP | EGFVERINF   | LANDLGNLLN |
| basu      | IERYGL..DE  | LRYLLREVP  | FGS.DGVFTP | EGFVERINYD  | LANDLGNLLN |
| bast      | IDRYGL..DA  | LRYLLREVP  | FGS.DGVFTP | EGFIERINYD  | LANDLGNLLH |
| baha      | IDRYGL..DA  | LRYLLREVP  | FGS.DGVFTP | EAFVERVNYD  | LANDLGNLLN |
| enfa      | VERYGL..DA  | LRYLLRAIP  | FGS.DGVFTP | EDFVSRLNYD  | LANDLGNLLN |
| ocih      | VERYGL..DA  | LRYLLMREVA | FGS.DGVFTP | EDFISRVNYD  | LANDLGNLLN |
| stpy      | VERFGL..DP  | LRYLLMRSLP | VGS.DGTFTP | EDYVGRINYE  | LANDLGNLLN |
| stpn      | VERYGL..DP  | LRYLLMRNLP | VGS.DGTFTP | EDYVGRINYE  | LANDLGNLLN |
| stmu      | VERYGL..DP  | LRYLLMRSLP | VGS.DGTFTP | EDYVGRINYE  | LANDLGNLLN |
| lala      | IERYGL..DA  | VRYLLMRAIS | FGQ.DGIFTP | EDFVGRINF   | LANDLGNLLN |
| stau      | IDRYGL..DA  | TRYLLMRELP | FGS.DGVFTP | EAFVERTNFD  | LANDLGNLVN |
| oeoe      | ESRYGL..DA  | VRYLLRSMP  | FGN.DGVFSP | EDFVNRVNFD  | LANDLGNLLN |
| thma      | VKRYGN..DV  | VRYLLIRDIM | FGK.DGDFSE | ERLVHRLNSD  | LANDYGNLLH |
| thth      | LEKYGR..DA  | LRYLLREIP  | YGQ.DTPVSE | EALRTRYEAD  | LADDLGNLVQ |
| dera      | VAAWPV..DA  | IRYALLREAS | LGA.DSPFGE | GVLVSRLNSD  | LANDLGNLLS |
| stco      | TTHFGV..DA  | YRWYFLRAIA | FGQ.DGSFSW | EDFSARYTSE  | LANDYGNLAS |
| hepyj99   | AMEYGI..EE  | LRYFLLREVP | FGQ.DGDFSK | KALVERINAN  | LNNDLGNLLN |
| hepy26695 | AMEYGI..EE  | LRYFLLREVP | FGQ.DGDFSK | KALIERINAN  | LNNDLGNLLN |
| caje      | VDAYGS..EA  | FRYFLLREVP | FGN.DGDFSE | NMLINRINAE  | LSNEFGNLLN |
| aqae      | VQEYGL..DE  | VRYFLLREVP | FGQ.DGDFSK | KAILNRINGE  | LANEIGNLYS |
| funu      | IKKYGV..DA  | FRYLLREAN  | FGT.DGDYST | KGIIGRLNSD  | LANDLGNLLN |
| trer      | IQKYGS..DA  | VRYYFLKEIE | FGV.DGDFNE | NRFINVLNAD  | LANDLGNLLN |
| sy6803    | INRYGE..DA  | FRYFLKEIE  | FGK.DGDFNE | QRFVNVLNAD  | LANDLGNLLN |
| arth_1    | VQKFGP..DA  | VRYFFLREVE | FGN.DGDYSE | DRFIKIVNAH  | LANTIGNLLN |
| prma      | LSKYGK..EA  | VRWYLLKDIT | LGQ.DGDFQN | KRFVDIINND  | LANTIGNLLN |
| caelmt    | LDRYTV..DG  | FRYFLLRQGV | PNW.DCDYYD | EKVVKLLDSE  | LADALGGLLN |
| hosamt    | LNRYTV..DG  | FRYFLLRQGV | PNW.DCDYYD | EKVVKLLNSE  | LADALGGLLN |
| tarumt    | SQLFTT..DG  | LRYFLLRQGV | PDT.DCDYRD | DKVVKLLNAE  | LADALGGLLN |
| drmemt    | AQQYTM..EG  | LRYFLLREGV | AHS.DGNYSH | VKAQRILNSE  | LADTLGNLLS |
| anga2     | AELYTY..EG  | LRYFLLREGV | AHS.DGNYSD | TKVLRILNSE  | LADTLGNLLS |
| didimt    | IDNHGL..EL  | IRYFLLKGGG | LEN.DGDWSE | HELAVRFKSD  | LADTYGNLIS |
| caabmt    | SEYYGV..DP  | VRFFLVENS  | IDD.DCKFSE | ELLQRSR.DA  | VLGKYCNLIS |
| sacemt    | ARYYGA..DI  | VRWFLLENSK | LEE.DGDFQE | AKLYETR.EL  | LVSKWGNLIN |
| scpomt    | IEKYGV..DT  | IRYLLKRGR  | LTS.DSNFDI | EELEKDEEHD  | LRRSLGVLLS |
| lema      | AKEFGI..DA  | LKYFLMRESN | FQD.DGDYSD | KNMVARLNGE  | LADTLGNLVS |
| myge      | IDQFGV..DG  | TRYCLLKEMR | LDK.DNRCSV | SILKEIYNAD  | LANSFGNHVS |
| mypn      | LAQFGV..DG  | TRYCLLKEMR | LDK.DNRCSM | AIFKDIYNAD  | LANSFGNHAS |
| urur      | IDTYGV..DA  | LRYLLMADLS | LFR.DAIFSE | DNLIETYNTQ  | LANSYGNMIS |
| mypu      | IEKYGS..EV  | LKYFLIAKLS | IKK.DGVFSE | ELLVSAYNND  | LVNTFSNLIS |

|       |            |            |            |  |      |            |         |
|-------|------------|------------|------------|--|------|------------|---------|
| mask  | *****      |            |            |  |      |            |         |
| stpn2 | RTLKFIEK.. | ..YFESEIPT | KYLEG..... |  | EILY |            |         |
| bace2 | RTLKFIEK.. | ..YYGGIVPK | GSIDV..... |  | ELKD |            |         |
| baan2 | RTLKFIEK.. | ..YYGGIMPK | GSIDV..... |  | ELKD |            |         |
| clpe2 | RVLTFIKK.. | ..NFSGEIKG | EELPL..... |  | QWKN |            |         |
| deet  | RVLTMVCR.. | ..NFDNKVPE | YG.EL..... |  | DERS | L.....     | NLI     |
| codi  | RTVSMAYK.. | ..NFG.EVPT | PG.EL..... |  | TESD | K.....     | KIL     |
| thnw  | RILSFMDR.. | ...YSINPDP | VD.VS..... |  | GDEE |            | F       |
| thvo  | RTLSFINK.. | ...YDLKITK | PN.SL..... |  | NDEA |            | F       |
| pogi  | RALVLTHK.. | ..YFDGAVPP | KG.EL..... |  | TDCD | S.....     | RTI     |
| bafr  | RAMVLTQK.. | ..YFEGKVPA | AG.EL..... |  | TDYD | K.....     | ETL     |
| cyhu  | RALVLTHK.. | ..YYDSVIPA | LG.KL..... |  | EASD | E.....     | GVI     |
| chte  | RSIDFTNS.. | ..RFGGQVPA | DI.DL..... |  | EAWD | S.....     | LGI     |
| chmu  | RVVAFAAK.. | ..NGCTELSH | P..QL..... |  | EQOD | L.....     | EFI     |
| chtr  | RVLAFAVK.. | ..NGCTELSS | P..QL..... |  | EQKD | L.....     | DFI     |
| chpn  | RVLAFAEK.. | ..NHYDKLSY | HSVVL..... |  | EDSD | R.....     | AFL     |
| fugu  | RAGMFVTK.. | ..FFEGCVPA | MVLQQ..... |  | EDKK |            | LL      |
| hosa  | RAGMFVSK.. | ..FFGGYVPE | MVLTP..... |  | DDQR |            | LL      |
| anga  | RALVFCEK.. | ..FFDSTIPP | MTLLE..... |  | EDYT |            | LL      |
| drme  | RALVFCEK.. | ..NFSSTVPG | VITTO..... |  | DELV |            | LL      |
| sace  | RLIKFVNA.. | ..KYNGVVPK | FDPK.....  |  | KVSN |            | YDGLV   |
| scpo  | RTLKFTTA.. | ..KYNGLVPH | YLTDP..... |  | SVGA | G..        | KLKADFV |
| didi  | RVLKMLNT.. | NAAFNGVVPK | IGELN..... |  | EVDK |            | KLK     |
| arth  | RVLSFIAKPD | NAGYGSVIPD | AHDAE..... |  | SHSL |            | TKSLA   |
| orsa  | RVLSFVAKPA | GAGYDSIVPD | APNAE..... |  | SHPL |            | TKALA   |
| cael  | RALSFVAN.. | ..SFGGVVPE | MNLTN..... |  | DD.. |            | AEVL    |
| encu  | RVLKYIQS.. | ..KCNSRVSL | LELDS..... |  | GDKK |            | CI      |
| trde  | RTATFIHR.. | ..YYDGKIPQ | VDGAK..... |  | SGRE | DIKSMVKSLR |         |
| trpa  | RTLTFVAR.. | ..TYGGVPPA | QDGAR..... |  | STRA | QVMEETLALR |         |
| bobu  | RVLTFQRK.. | ..FFGDVIET | IE.IQ..... |  | N... |            | K.FW    |
| cacr  | RILKFNES.. | ..KFEGVPPA | GGEPP..... |  | PLEE | K.....     | LF      |
| suto  | RVLSMVRR.. | ..YFNGEVPQ | IKYEK..... |  | LKDE | DTK.....   | FI      |
| suso  | RVLSMVNR.. | ..YYSGIVPE | FKIDI..... |  | LDDN | DRK.....   | II      |
| aepe  | RVLSLVRS.. | ..RMSGVAPE | P..ED..... |  | LGEH | QG.....    | FV      |
| pyba  | RVLSFIKN.. | ..RMGGAVPP | R..GK..... |  | PSRD | DEE.....   | FI      |
| pyho  | RAMTFVNR.. | ..YFDGI.VP | ERGEL..... |  | DELD | R.....     | QAL     |
| pyab  | RALTFVNR.. | ..YFDGV.VP | ERGEL..... |  | DELD | R.....     | EAL     |
| pyfu  | RALTFVNR.. | ..YFDGI.VP | ERGEL..... |  | DELD | R.....     | QAL     |
| meja  | RVLTFTHR.. | ..KFKKVPIV | DEDRL..... |  | KEED | K.....     | ELL     |
| meth  | RTFSFTGR.. | ..FFDGR.VP | AAGEL..... |  | TAED | L.....     | EFL     |
| arfu  | RVLLFAWK.. | ..NFGEV... | .RMEG..... |  | .VD  | E.....     | EVL     |
| hanrc | RALLFANR.. | ..NFDGT... | .PQEV..... |  | S.LT | D.....     | DVE     |
| psfl  | RCAGFIQK.. | ..GNAGLLVD | TNAAP..... |  | E... |            | LT      |
| psae  | RCAGFIHK.. | ..GNAGVLVG | ADPAP..... |  | E... |            | LL      |
| esco  | RNAGFINK.. | ..RFDGVLAS | ELADP..... |  | Q... |            | LY      |
| saty  | RNAGFINK.. | ..RFDGVLAA | ELADP..... |  | Q... |            | LY      |
| yepe  | RNAGFINK.. | ..RFAGQLAD | QLADP..... |  | V... |            | LY      |
| vich  | RNAGFITK.. | ..RFDGKLSA | HFAEP..... |  | E... |            | LY      |
| haein | RNAGFIAK.. | ..RFEGKLAD | KLEDK..... |  | S... |            | LF      |
| acac  | RNAGFIQK.. | ..RFDGKLAA | SLDDQ..... |  | A... |            | LF      |

|           |             |              |            |            |            |
|-----------|-------------|--------------|------------|------------|------------|
| pamu      | RSAGFITK..  | ..RFDGKLSA   | EIAEP..... | .....E...  | .....LL    |
| neme      | RASGFIAK..  | ..RFEGRLKD   | .VADS..... | .....E...  | .....LL    |
| nogo      | RASGFIAK..  | ..RFEGRPKD   | .VSGS..... | .....A...  | .....LL    |
| xyfa      | RCASFIGT..  | ..RFNGQLAD   | TLPDR..... | .....I...  | .....QY    |
| buAPS     | RNASFINK..  | ..YFNGYLSLSD | KLSNI..... | .....K...  | .....LY    |
| sime      | RSLSMIVK..  | ..NCDGQVPL   | CGPLT..... | .....DE..  | .....DKAML |
| agtu      | RSLSMIVK..  | ..NCDGQIPT   | PGAFN..... | .....DD..  | .....DKAML |
| brsu      | RSLSMIAK..  | ..NCEGKVPQ   | PGAFS..... | .....EA..  | .....DKAIL |
| melo      | RSLSMIAK..  | ..NCGGVVPK   | RGEMT..... | .....DA..  | .....DSAIL |
| rhpa      | RSLTMVAK..  | ..QCEGKVPE   | HGAFS..... | .....ET..  | .....DSAIL |
| mytu      | RSLSMVAK..  | ..NLDGRVPN   | PGEFA..... | .....DA..  | .....DAALL |
| rhru      | RVLSMIAK..  | ..NCAGAVPE   | PGPFS..... | .....ED..  | .....DDALL |
| noar      | RTLISMIFK.. | ..NMGGNLET   | FHSNV..... | .....GD..  | .....DELLA |
| rico      | RTTSFVYK..  | ..NNDAKVPL   | LTQGV..... | .....IDKI  | Y....ELPIL |
| ripr      | RIVSFVYK..  | ..NNDAKVPL   | IKSGV..... | .....IDKI  | Y....ELPIL |
| plyo      | RTLSLCIL..  | ..SNNAKIPP   | LY.....    | .....DD..  | I....DIDL  |
| plfa      | RTLSLCQL..  | ..CNEKIPA    | FY.....    | .....PE..  | Y....EIHLP |
| clpe1     | RTIAMVYK..  | ..YFGGVIQA   | PTCK.....  | .....EPI.  | .....DDELI |
| clac      | RTAAMIEK..  | ..YFDGSIQP   | PVDK.....  | .....EEI.  | .....DNELI |
| liin      | RTVAMINK..  | ..YFDGEIPA   | YQGNV..... | .....TEF.  | .....DQTLV |
| limo      | RTVAMINK..  | ..YFDGEIPA   | YQGNV..... | .....TEF.  | .....DQILV |
| baan1     | RTVAMIDK..  | ..YFNGEIPA   | FKANV..... | .....TEF.  | .....DETLV |
| bacel     | RTVAMIDK..  | ..YFNGEIPA   | FKANV..... | .....TEF.  | .....DGTLV |
| basu      | RTVAMINK..  | ..YFDGQIGS   | YKGAV..... | .....TEF.  | .....DHTLT |
| bast      | RTVAMIEK..  | ..YFGGAIIP   | YRGPK..... | .....TPF.  | .....DRDLS |
| baha      | RTVAMIEK..  | ..YFDGKIPS   | YVKDG..... | .....TPF.  | .....DADLV |
| enfa      | RTIAMINK..  | ..YCDGKVPA   | YASKV..... | .....TPF.  | .....DSELS |
| ocih      | RTVAMINK..  | ..YFDGKVPE   | FKGEV..... | .....TSF.  | .....DGELQ |
| stpy      | RTVAMINK..  | ..YFDGTVPA   | YVDNG..... | .....TAF.  | .....DADLS |
| stpn      | RTVSMINK..  | ..YFDGQIPA   | YVEGV..... | .....TEF.  | .....DHVLA |
| stmu      | RTVAMINK..  | ..YFGGEIPA   | YVENV..... | .....TDF.  | .....DADLA |
| lala      | RTVSMINK..  | ..YNDGKIEA   | TGVS.....  | .....TEF.  | .....DASLE |
| stau      | RTISMINK..  | ..YFDGELPA   | YQGPL..... | .....HEL.  | .....DEEME |
| oeoe      | RTISMINR..  | ..YENGQIPK   | LDKLL..... | .....PE..  | .....DRELE |
| thma      | RITAMIKK..  | ..YFNGLRPS   | PSAQ.....  | .....EGF.  | .....DSWLK |
| thth      | RTRAMLFR..  | ..FAEGRIP.   | ..EP.....  | .....VAG.  | .....EELAE |
| dera      | RTVSMIQK..  | ..YRGGVIPA   | ATEP.....  | .....TDR.  | .....EREIE |
| stco      | RVAAMVGK..  | ..YFGGELPA   | ATADG..... | .....DAE.  | .....QAIHD |
| hepyj99   | RLLGMAKK..  | ..YFNYSLSKS  | TKIT.....  | .....AYY.  | .....PKEL. |
| hepy26695 | RLLGMAKK..  | ..YFNHSLKS   | TKIT.....  | .....AYY.  | .....SKEL. |
| caje      | RIIGMSTK..  | ..YSQGNISK   | EGVL.....  | .....KFY.  | .....NAEL. |
| aqae      | RVVNMAHK..  | ..FLGGEVSG   | ARDE.....  | .....EYA.  | .....      |
| funu      | RTLGMYYK..  | ..YFNGTIVS   | SSTV.....  | .....EPI.  | .....DDEIK |
| trer      | RTLKMAHK..  | ..YFNGQIPK   | INVQE..... | .....VEV.  | .....THPLK |
| sy6803    | RTLGMVKK..  | ..YCQGQGPQ   | VMATD..... | .....LAP.  | .....DNPLK |
| arth_1    | RTLGLLKK..  | ..NCEST.LV   | VDSTV..... | .....AAE.  | .....GVPLK |
| prma      | RTSSMSRK..  | ..WFDNR..V   | PSNEM..... | .....LSK.  | .....DNSLE |
| caelmt    | RCTAYRIN..  | ..PSGTYPSP   | CAACFPSEPG | LTGPSVRVQA | E....DYALV |
| hosamt    | RCTAKRIN..  | ..PSETYPAF   | CTTCFPSEPG | LVGPSVRAQA | E....DYALV |
| tarumt    | RCTATALN..  | ..PAQVYASF   | CPDSFPRERG | .G....RADD | D....DYRML |
| drmemt    | RASAKSLN..  | ..PGQIYPSP   | SAEHLAD... | ....LLRSLD | V....AKRLQ |
| anga2     | RCCGKALN..  | ..AESIFPAV   | DREALG.... | ....ALKEID | A....TKRML |

|        |            |            |            |            |            |
|--------|------------|------------|------------|------------|------------|
| didimt | RCTGKALN.. | ..PSGEWPKS | VTDTS..... | .....LFTM  | D....DQKLI |
| caabmt | RIGGKNFS.. | ..IEEAVKSF | ASGEFNN... | .IREIIETYT | I....NKDSV |
| sacemt | RCCGSKFN.. | ..IERAVMKF | SDKANFQ... | .FQEIFQNEP | I....VSERI |
| scpomt | RLQSKKLF.. | ..ISNEIQKQ | WHKK.....  | ..DDFTEYED | I....VHELI |
| lema   | RCVAPKIN.. | ..VNGMWPEP | AEYS.....  | .....E     | S....DKTLI |
| myge   | RTFGMIKK.. | ..YLNKGL.E | YQII.....  | .....TDN   | A....LQKIM |
| mypn   | RTFGMIKK.. | ..YLGQL.D  | FIEV.....  | .....QDP   | Q....VKQLM |
| urur   | RTLGMKK..  | ..YRNNIVPK | YVGC.....  | .....VLK   | N....DEKLE |
| mypu   | RTVKMILN.. | ..NYDRPL.S | FILS.....  | .....KDQ   | E....DLEIE |

801

850

|       |             |       |             |             |            |
|-------|-------------|-------|-------------|-------------|------------|
| mask  | .....       | ..... | .....***    | *****       | *****      |
| stpn2 | .NLKELYTT.  | ..... | VGNLVESGHM  | KQALEEIFEY  | IRSANKFYDD |
| bace2 | .KIEGLYKH.  | ..... | VGEAIEQTKF  | KVALEAIFDA  | VRFANKYFDE |
| baan2 | .KIERLYKH.  | ..... | VGEAIEQTKF  | KVALESIFDA  | VRFANKYFDE |
| clpe2 | .LIRRTYAS.  | ..... | VGNKFENGEF  | KSGVKEMFNL  | IKQGNDFFDK |
| deet  | EKTSAMLFE.  | ..... | TDKALHGCNF  | REAIKLAMSL  | AQEANRYLDE |
| codi  | AQAEAAFV.   | ..... | VGEALAHSRF  | KQGITHAMHI  | VGEANAYIAE |
| thnw  | KYAQRSFEL.  | ..... | WSEDLSGVHV  | KRGLLRWLDL  | AIYANGFFNR |
| thvo  | EYAQNAFKE.  | ..... | YCDLSQVHI   | KRSLAIWLNL  | AIYANSYFNK |
| pogi  | EEFAAVKQA.  | ..... | LEHQLDTFHF  | REALKEAMNL  | ARIGNKYLAD |
| bafR  | KEFSVDKAE.  | ..... | VEKLLNVFKF  | RDAQKEAMNL  | ARIGNKYLAD |
| cyhu  | MMLKEFPAK.  | ..... | IAASIEQYRF  | REALGFMMDL  | ARLGNKYLAD |
| chte  | DWLASFG.K.  | ..... | LEAAYDGFHF  | REATAQTMEI  | ARFANRFLTE |
| chmu  | AEAQKLAK.   | ..... | AADHYQQYSL  | RKACSTIMEL  | AALGNGYFND |
| chtr  | SKSQKLAKD.  | ..... | AAEHYAQYSL  | RKACSTIMEL  | AALGNGYFND |
| chpn  | EEVRQLVRD.  | ..... | AEKCYREYSL  | RKATSVIMSL  | AALGNVYFNQ |
| fugu  | ALVAWELQQ.  | ..... | YIQLMDKVKI  | RDSLKHILNI  | SRHGNQYIQV |
| hosa  | GHVTLELQH.  | ..... | YHQLEKVRTI  | RDALRSILTI  | SRHGNQYIQV |
| anga  | ALINRELKG.  | ..... | YVNQMEKARM  | RDGIRHLLQI  | SRYGNQLMQS |
| drme  | ALINRELRG.  | ..... | YINSMEKAKL  | RDGVRHLLAI  | SRHNGYMQS  |
| sace  | KDINEILSN.  | ..... | YVKEMELGHE  | RRGLEIAMSL  | SARGNQFLQE |
| scpo  | KDVNALLAK.  | ..... | YNAALEASKL  | REGLRLAMEI  | SARGNQYLQD |
| didi  | QEVDEHLVQ.  | ..... | YFQKLEEISL  | KEGLKIAMS   | SKLGNTYMQD |
| arth  | EKVEKFVAE.  | ..... | YVEAMEKVKL  | KQGLKTAMLI  | SSEGNYLQA  |
| orsa  | EKTNKWVEQ.  | ..... | YLEAMEKVKL  | KQGLKSAMGI  | SSDGNAYLQE |
| cael  | SEIHNECMQ.  | ..... | WDKQFDGVHL  | KDAVKTILNV  | SRLGNQYMQA |
| encu  | EDVNELYCK.  | ..... | YKAKMEEIKL  | REALQVMEI   | CRRGNEYIQE |
| trde  | EAASASFKK.  | ..... | ITELSDWAE   | RDSFHEAFAL  | SSVANKAFQD |
| trpa  | EAVRNTAKR.  | ..... | MTDLMEQVQL  | REAFREVFAL  | SARANKALQD |
| bobu  | KQITPKYNK.  | ..... | ILNLFKKTEL  | KSALKEILKI  | SSLGNKIFQD |
| cacr  | ADVSARLAD.  | ..... | LAEQMDAIEI  | RKSAQALRAL  | WVVGNEYLQE |
| suto  | SEIKEAPKK.  | ..... | MSELFELGKL  | KAGSEEILKL  | ARNGNSYLN  |
| suso  | SLINETPKV.  | ..... | VGDLFEKGKL  | KAGTEEMLKF  | VRECNAYLNM |
| aepe  | ERVRAAWA.   | ..... | VAEDLEAIRI  | KRATEGILEI  | AREGNAYLNR |
| pyba  | EKVKRLF EK. | ..... | AEAHYEAIEL  | KDAVHTVVEI  | AREGNKYLNA |
| pyho  | EEIEKAFEE.  | ..... | VGELIMNYRF  | KDALKRVMEL  | ASFGNKYFDH |
| pyab  | EEIEKAFKE.  | ..... | VGELIMNYRF  | KDALKRVMSL  | ASFGNRYFDH |
| pyfu  | EEIEKTFEE.  | ..... | VGKLIREYRF  | KDALKKVMNL  | AGFGNRYFDY |
| meja  | KKCEETLEA.  | ..... | VDKNIRSFKF  | RDALVNILHL  | AIEGNSYFQK |
| meth  | ESIRAAHDT.  | ..... | VAELLDKFFQF | RDALMHI IKL | AKRGNKYFND |
| arfu  | EKIRETEQK.  | ..... | ILSALEEWEF  | KAASDAFMEL  | ATYGNVYFQN |

|           |            |       |             |             |            |
|-----------|------------|-------|-------------|-------------|------------|
| hanrc     | TEIAQAMDD. | ..... | YEDALNEYDL  | RTAGERAVAL  | ARFGNEYIQH |
| psfl      | EAFLLAAPS. | ..... | IADAYEARDF  | ARAMRETMAL  | ADRANAWIAD |
| psae      | AAFREAAPG. | ..... | IAEAYEARDF  | NRAMREIMAL  | ADRANAWIAE |
| esco      | KTFTDAAEV. | ..... | IGEAWESREF  | GKAVREIMAL  | ADLANRYVDE |
| saty      | KTFTDAAAV. | ..... | IGEAWESREF  | GKAIREIMAL  | ADVANRYVDE |
| yepe      | KTFTDAATS. | ..... | IADAYNNREX  | GKAIREIMAL  | ADVANRYVDE |
| vich      | AEFAGAADR. | ..... | IAELFEAREF  | GRAIREITAL  | ADKANQYVDE |
| haein     | AEFTAQAEQ. | ..... | IAAYYESREY  | NKTIREIMAL  | TDKANKYIDE |
| acac      | DEFIAQSEQ. | ..... | IAAYYENREF  | GKAIREIMAL  | TDKANKYIDD |
| pamu      | AEFVEKAAQ. | ..... | IATYYEEREF  | GKVVREVMQL  | ADKANKYIDD |
| neme      | AKLTAQSEA. | ..... | IAECYESREY  | ARALRDIMAL  | ADIVNEYVDA |
| nogo      | AKLAAESDT. | ..... | IAEQYENREY  | ARALRDIMAL  | ADIVNEYVDA |
| xyfa      | DQFVAALTP. | ..... | IRDAYERNDT  | ASAIRQTMQL  | ADEANKYIDE |
| buAPS     | KYFVNTSSS. | ..... | IEDFFENREF  | SFIVKESMRL  | LDVANQYINE |
| sime      | AAADSLIGT. | ..... | AREEMGKQLI  | HRALAAIIAV  | VSETDRYFAG |
| agtu      | ASADGLLAV. | ..... | CREEMGKQLI  | HRALAAIIAV  | VSETDRYFAS |
| brsu      | DQADAALET. | ..... | ARKAMDDQAL  | HLALGAIFAV  | VAEANRYFAG |
| melo      | DQAVAALTT. | ..... | ARKAMAGQGI  | HLALAAIFDV  | VAEADRYFAG |
| rhpa      | AMADAMITQ. | ..... | ARTAMATQQI  | HQALNAVWAV  | VAEANRYFAG |
| mytu      | ATADGLLER. | ..... | VRGHFDAQAM  | HLALEAIWLM  | LGDANKYFSV |
| rhru      | AAVALLDK.  | ..... | VRQAMDRQAF  | HEALEAIWVW  | IRAANGYVDR |
| noar      | TVFNACREE. | ..... | LPREFSALNF  | SAGIEAWMRA  | VFACNAYVDE |
| rico      | KTASKFVEQ. | ..... | NILLMDKTEI  | NKILENI INL | AEEANIYIDS |
| ripr      | KTAIKFAQE. | ..... | NILLMDKTEI  | NKILENI INL | AEDANIYITN |
| plyo      | FCMLHFINR. | ..... | IEYYMKNFHI  | HKFCEKTVNV  | CKDLNKFLTD |
| plfa      | IDILHFINR. | ..... | VEYHMKTFCV  | QKCCEKSVQV  | CKDLNKFLTD |
| clpel     | NLALSTPGK. | ..... | VEASIDALKI  | PEALESIWTL  | ISRANKYIDE |
| clac      | DMAISLPEK. | ..... | LDEDIKKLLKI | PEALDHIWDL  | IKRANKYIDE |
| liin      | DFKNNVVKE. | ..... | YEGSMDHMQF  | SVALNQLWSL  | ISRTNKYIDE |
| limo      | DFKNNVVKE. | ..... | YEGSMDHMQF  | SVALNQLWSL  | ISRTNKYIDE |
| baan1     | TFAKDTLKK. | ..... | VEEAMENMEF  | SVALSSIWQL  | VSRTNKYIDE |
| bacel     | TFAQDTLKK. | ..... | VEEAMENMEF  | SVALSSIWQL  | ISRTNKYIDE |
| basu      | SVAEETVKA. | ..... | YEKAMENMEF  | SVALSTLWQL  | ISRTNKYIDE |
| bast      | ETAREVVRQ. | ..... | YEEAMERMEF  | SVALSAVWQL  | IGRTNKYIDE |
| baha      | ELVYSTVKK. | ..... | VEDAMEEMEF  | SIALTAIGQL  | ISRTNKYIDE |
| enfa      | TTAANVIGK. | ..... | YHEAMEKMEF  | NTAIAEIWTL  | VSRANKYIDE |
| ocih      | TTANNAVKE. | ..... | YEKHMEGMQF  | SDALKQVWIL  | ISRANKYIDE |
| stpy      | QLIDAQLAD. | ..... | YHKHMEAVDY  | PRALEAVWTI  | IARTNKYIDE |
| stpn      | EVAEQSIAD. | ..... | FHTHMEAVDY  | PRALEAVWTL  | ISRTNKYIDE |
| stmu      | AVVADNLAQ. | ..... | YHKQMNAVDY  | PRALETVWNI  | ISRTNKYIDE |
| lala      | EVVEETISH. | ..... | FHKAMDKFEF  | NVALADVWTL  | ISRTNKYIDE |
| stau      | AMALETVKS. | ..... | YTESMESLQF  | SVALSTIWKF  | ISRTNKYIDE |
| oeoe      | ETASQAVEN. | ..... | FKDEMEKVHT  | ADALEAVWTL  | IRRTNKYIDE |
| thma      | ERFFETKDA. | ..... | YHELMDSYRL  | TEALDKIWEF  | IADVKNYFND |
| thth      | GTG..LAGR. | ..... | LRPLVRELKF  | HVALEEAMAY  | VKALNRYINE |
| dera      | AAARALPDE. | ..... | VLRLVDELKI  | NMAIDAAMSF  | VRDLNRYIAE |
| stco      | GLTKAVAEA. | ..... | DRKIGEELDF  | QGGILAVFDF  | VKQVNGYITE |
| hepyj99   | EKAHQILDN. | ..... | ANSFVPMQL   | HKALEELFNI  | YDFLNKLIK  |
| hepy26695 | EKVHQILDN. | ..... | ANSFVPMQL   | HKALEELFNV  | YDFLNKLIK  |
| caje      | NQAKEHLNL. | ..... | AVEFLENLQC  | NRYLEELFKA  | LSVANLAISK |
| aqae      | KIAQESIKN. | ..... | YENYMEKVN   | YKAIEEILKF  | TSYLNKYVDE |
| funu      | SMFNDVVKD. | ..... | VEKYMYLFEF  | SRALETIWKF  | ISRLNKYIDE |

|        |             |            |            |            |            |
|--------|-------------|------------|------------|------------|------------|
| trer   | KIGMGLGEK.  | .....      | VTQAYTSLDF | SQVCEAVLIL | VRTGNKYIDE |
| sy6803 | ALGSHLSEE.  | .....      | VSSAYERLSF | TDACEAIFTL | VRAGNKYIDD |
| arth_1 | DTVEKLVEK.  | .....      | ARTNYENLSL | SSACEAVLEI | GNAGNTYMDQ |
| prma   | LYAKKTVEN.  | .....      | YFRHFNSYEL | DLAANVILSL | AINTNLYLNE |
| caelmt | TAVATLPKL.  | .....      | VAGYYNDFQI | YKALEAVSSC | VRQTNGFVQR |
| hosamt | SAVATLPKQ.  | .....      | VADHYDNFRI | YKALEAVSSC | VRQTNGFVQR |
| tarumt | ESVRHLPVAV. | .....      | VEQHFEDMHV | YKALEAVSTC | VRQTNGFVQR |
| drmemt | DSLLQLSER.  | .....      | CESHYECNHF | HLVADTTMAA | LHAANNFFES |
| anga2  | EALEEMPDK.  | .....      | ASSHYKNYNF | YLVVDTIVHL | LHTANNFFET |
| didimt | ENSSILVKS.  | .....      | VSTHYDRGDF | KSGIFEIMTF | LYECNLYVQN |
| caabmt | EGLLSSLNKL  | TTDLNDLYNQ | MDHYFTNFDY | IRAIQCWWSV | INQANQIFQS |
| sacemt | ENLAKLLNK.  | .SQ.....EV | FDEKIAIFQY | PQLLRHVWSI | INDANTLVQN |
| scpomt | ELPVVCAQS.  | .....      | ....IDGCV  | YEVINLVQSV | LRRVTKLFLQ |
| lema   | ASLNNLAGT.  | .....      | VDHYYCLPDI | QHALIAIFDV | LRSLNAYVTE |
| myge   | ILIDESIVQ.  | .....      | FDHYFNSEYF | YRAINLLKI  | VFELSKLIDD |
| mypn   | DQANQAMVQ.  | .....      | FDTAWNRFQF | YKGINLLQL  | VFQASKLIDQ |
| urur   | NLINKNIEL.  | .....      | VQENINKYSI | DKALNCIQEI | LVEANKYIED |
| mypu   | KDIKNSFET.  | .....      | FCSFAEYEF  | DKAFESTINL | GKKLNLYIDK |

851

900

|       |            |       |            |            |             |
|-------|------------|-------|------------|------------|-------------|
| mask  | *****      | ..... | .....      | .....      | .....***    |
| stpn2 | MKPWALRES. | ..... | DIE...KCK  | EVLATCVIII | LNLGQMLNPF  |
| bace2 | RQPWKERED. | ..... | DPV...SCE  | ETIYNCVYLI | ANFVNLLLEPF |
| baan2 | RQPWKERED. | ..... | DPV...SCE  | ETIYNCVYLI | ANFANLLEPF  |
| clpe2 | NKPWILINN. | ..... | NKK...KCE  | EVLYICSQIL | VALTDLMNPI  |
| deet  | KAPWKEIK.. | ..... | .VD..KAAA  | RSLYVAMAAL | SGLRVAFYFP  |
| codi  | QEPWKLAKD. | ..... | ESQ..RERLA | TVLWTALQVV | SDCNVLLTPY  |
| thnw  | SEPWKTIK.. | ..... | .ND..RQKLN | HDLYLSLKIT | EVLTVMVYPY  |
| thvo  | SEPWNLIK.. | ..... | .TD..RDQCN | YKLYVSLKLA | QYLTAMIYFP  |
| pogi  | TEPWKLAK.. | ..... | TD...MNRVA | TILNLSLQIT | ANLAIAFEPF  |
| bافر  | TEPWKLAK.. | ..... | TD...MERVG | TILNLSLQLV | ANLAIAFEPF  |
| cyhu  | TEPWKIYK.. | ..... | EN...PERVK | TILHIGLQIA | ANLAIVSEPF  |
| chte  | SEPWKVIK.. | ..... | VD...PEAAG | RTMAVSLNLC | HTLALLFWPI  |
| chmu  | QAPWKLAK.. | ..... | EDL..WNRVR | SILFCACYCQ | KLLALISYPI  |
| chtr  | EAPWKLAK.. | ..... | EGN..WNRVR | AILFCACYCQ | KLLALISYPI  |
| chpn  | QAPWKLAK.. | ..... | EGT..RERVE | AILFCACYCQ | KLLALISYPI  |
| fugu  | NEPWKNIKA. | ..... | GDA.ERQAG  | TVTGVSVNIA | CLLSVMLYPY  |
| hosa  | NEPWKRIKG. | ..... | SEA.DRQAG  | TVTGLAVNIA | ALLSVMLQPY  |
| anga  | EPPWKVKG.  | ..... | TDD.QKARAG | TVIGLCCNFA | CLLATLIFPF  |
| drme  | QQPWVLLKG. | ..... | TDD.QKTRAS | TIIGLCVNIA | CLLANLLFPY  |
| sace  | NKLDNTLFS. | ..... | QSP.EK..SD | AVVAVGLNII | YAVSSIITPY  |
| scpo  | NRIDNKCYL. | ..... | YER.QK..CA | DAIGYALNLI | YLLAAIFYPY  |
| didi  | NKPWDLG..  | ..... | KDN.ER..CG | QVLAILINLI | KLLSTLLEPY  |
| arth  | SQFWKLYKE. | ..... | D...KPLCA  | VVIRTAAGLV | HLLAQLLEPF  |
| orsa  | SQFWKLYKE. | ..... | D...PAACA  | VVMKTSVGVV | YLLACLLEPF  |
| cael  | QTPWVLMKK. | ..... | DEE.GKKRAG | TIIGVAANIA | YHVSVLLYPI  |
| encu  | G....VRS.  | ..... | RDR..K..G  | HFFCLGFSII | GLVGTLLHPF  |
| trde  | GEPWK.RRE. | ..... | TDP.EY..AE | ALMSELCYLI | KDILILIHYPY |
| trpa  | GAPWK.TRA. | ..... | QDR.ER..AD | ALMRELCYVI | RDVLLLAHPF  |
| bobu  | NEPWK.RKN. | ..... | NSP.QE..TK | ELISNLIYLI | RDLISILMMPF |
| cacr  | AAPWTAIKT. | ..... | D.R.DR..AA | VIVRTALNLA | ALYAKISAPF  |
| suto  | RAPWNLIK.. | ..... | DKE....EAG | NVLNIAVNSL | RTLSIMLYPL  |



|       |            |       |            |            |            |
|-------|------------|-------|------------|------------|------------|
| suso  | KAPWDLYKS. | ..... | GKEI...ELK | NTLYIGTNSV | KTIAILLYPL |
| aepe  | TQPWKLLSQ. | ..... | DRE....EGV | RALSAALYAV | KTLAHLAPF  |
| pyba  | RAPWDLVKK. | ..... | DVD....AAN | AVMYHAYWSL | KFLAVGLAPA |
| pyho  | KQPWKTAKE. | ..... | DRA....RTG | TTVNISLQIV | KALGILLEPF |
| pyab  | KQPWKTAKE. | ..... | DKV....RTG | TTVNISLQIV | KALGILLEPF |
| pyfu  | KEPWKTIKE. | ..... | DKT....RTG | TTINISLQIV | KALGILLEPF |
| meja  | MEPWAVDDE. | ..... | E.....RLK  | EILYTCKTV  | KTLVYLLYPY |
| meth  | QEPWKAVKE. | ..... | SPA....RAS | TCLHLCNLLA | ANLGKLLRPF |
| arfu  | AKPWELIKT. | ..... | DKE....AAR | RAVASCLQLA | KALIFAYPV  |
| hanrc | NEPWNL.... | ..... | DSE....AAA | PVMRDCVQLV | KAVAVLLQPF |
| psfl  | KAPWSLNKQ. | ..... | EGK..QDEVQ | AVCATAINLF | RQLVIFLKPV |
| psae  | QAPWALAKQ. | ..... | EGQ..QDKVQ | AVCGLGINLF | RQLVIFLKPV |
| esco  | QAPWVAKQ.  | ..... | EGR..DADLQ | AICSMGINLF | RVLMTYLKPV |
| saty  | QAPWVAKQ.  | ..... | EGR..DADLQ | AICSMGINLF | RVLMTYLKPV |
| yepe  | QAPWVAKQ.  | ..... | EGR..DADLH | AICSMGINLF | RVLMTYLKPV |
| vich  | KAPWVAKQ.  | ..... | EGQ..DQALQ | DICTVGINLF | RVLMTYLKPV |
| haein | KAPWVIAKE. | ..... | EGK..EAELQ | AVCSMGIELF | RVLMSYLKPV |
| acac  | KVPWVIAKE. | ..... | AGK..DAELQ | AVCSMGIQLF | RVLMGYLKPV |
| pamu  | KAPWVMAKE. | ..... | EGR..EAELQ | AVCSMALQLF | RVLAIYLKPV |
| neme  | NKPWELAKQ. | ..... | EGQ..DARLH | EVCSELINAF | TMLTAYLAPV |
| nogo  | NKPWELAKQ. | ..... | EGQ..DERLH | EVCSELINAF | TMLTAYLAPV |
| xyfa  | TKPWIIAKQ. | ..... | HNA..DAQLH | AVCTQGLNLF | RVLITALKPI |
| buAPS | KKPWKIKRT. | ..... | EEN..IRELQ | NICTMGINLF | RIIMIFLKPI |
| sime  | QEPWALKKT. | ..... | ...DPSRMA  | TVLYVTAEVV | RQVAILLQPF |
| agtu  | QEPWALKKT. | ..... | ...DPERMG  | TVLYVTAEVV | RQIGILLQPF |
| brsu  | QEPWALRKT. | ..... | ...DPARMG  | TVLYVTAEVL | RRVGIMVQPF |
| melo  | QAPWALKKT. | ..... | ...DPERME  | TVLWTTAELV | RRVAVLCQPF |
| rhpa  | EAPWALAKT. | ..... | ...DPARQK  | TVLYVTAEVL | RQIAILAQPA |
| mytu  | QQPWVLRKS. | ..... | ESEADQARFR | TTLYVTCEVV | RIAALLIQPV |
| rhru  | QAPWALRKN. | ..... | ...DPPRMA  | TVLYVLAEVI | RRVALLMQPF |
| noar  | QAPWALRKT. | ..... | ...DPERMK  | AVLLTLFIAI | RDLTVAISPV |
| rico  | EAPWNLKKT. | ..... | ...DPDKML  | EVLYALLEVL | RYIAIMLLPF |
| ripr  | EAPWNLKTT. | ..... | ...DPDKML  | EVLYSLLEVL | RYIAIMLQPF |
| plyo  | LAPWKYKEE. | ..... | S...EKNKKL | HIIRLMLESI | YFIAHYIDIV |
| plfa  | MAPWKYKDD. | ..... | ...LKNKKL  | HIIRIMLEAI | YFIAHYLDIF |
| clpel | TTPWILAKD. | ..... | EE..KKERLG | TVLYNLETL  | RFVSVMISPF |
| clac  | TTPWVLAKD. | ..... | EN..KKARLG | TVLYNLVESL | RFVATTLTPF |
| liin  | TAPWALAKE. | ..... | ED..KRTELA | SVMTHLAENL | RIIAVLLQPF |
| limo  | TAPWALAKD. | ..... | ED..KRTELA | SVMTHLAENL | RIIAVLLQPF |
| baan1 | TQPWVLAKD. | ..... | ED..DREKLA | SVMAHLAEVL | RQTGIMLMPF |
| bacel | TQPWVLAKD. | ..... | EN..DREKLA | SVMAHLAEVL | RQTGIMLMPF |
| basu  | TAPWVLAKD. | ..... | PA..KEEELR | SVMYHLAESL | RISAVLLQPF |
| bast  | TQPWVLAKE. | ..... | ES..KREELA | SVMAHLAESL | RYTAVLLQPF |
| baha  | TQPWVLAKD. | ..... | ES..KREQLG | AAMYHLAESI | RYVSVLLQPF |
| enfa  | TAPWVLAKE. | ..... | EE..KRNELE | SVMIHLESL  | RIVAILLQPV |
| ocih  | TEPWIVAKD. | ..... | EG..RRNELA | SVMVHLAESL | HAAALMLQPF |
| stpy  | TAPWVLAKE. | ..... | DG..DKAQLA | SVMAHLAASL | RLVAHVIQPF |
| stpn  | TAPWVLAKD. | ..... | EA..LRDQLA | SVMSHLAASI | RVVAHLIEPF |
| stmu  | TTPWVLAKD. | ..... | KA..KRDDLA | AVMAHLAASL | RVVAHLIQPF |
| lala  | TAPWVLAKS. | ..... | ED..DKAKLN | NVLYHLAENL | RIAGALLQPF |
| stau  | TTPWVLAKD. | ..... | DS..QKDMLG | NVMAHLVENI | RYAAVLLRPF |
| oeoe  | TEPWVLDKN. | ..... | K...QRAELD | DAMAHLAASL | RVVGSLLQPV |

|           |            |            |                |        |            |            |
|-----------|------------|------------|----------------|--------|------------|------------|
| thma      | TKPWILGKE. | .....      | G...           | NMERLG | TVLYNSLEAV | FKVALMTLPV |
| thth      | KKPWELFKK. | .....      | EP..           | EEAR.. | AVLYRVVEGL | RIASILLTPA |
| dera      | STPWTLAKS. | .....      | PE..           | TQGRLD | TVLYTAAEGL | RVASVALEAV |
| stco      | QEPWKVAKD. | .....      | DSPEGKARLA     |        | TILYTAEEAL | RAVAVLLNPI |
| hepyj99   | EEPWVLHK.. | .....      | NN..           | ESEKLE | ALLSLIANTL | LQSSFLLYAF |
| hepy26695 | EEPWVLHK.. | .....      | NN..           | ESEKLE | ALLSLIANAL | LQSSFLLYAF |
| caje      | YEPWSLIK.. | .....      | EN..           | KHEQAN | ALVALCANIL | AKTSLLLSPT |
| aqae      | KQPWALNK.. | .....      | ER..           | KKEELQ | KVLYALVDGL | FVLTHLLYPI |
| funu      | TMPWTLAKN. | .....      | EA..           | KKARLA | AVMNILCEGL | YKIAFLIAPY |
| trer      | TAPWSLYKQ. | .....      | G...           | QLEALT | EVLYSVLESV | RLVAYLLSPI |
| sy6803    | MAPWKLFKQ. | .....      | G...           | SQKEVE | DVLYSVLESI | RLSAYLLSPI |
| arth_1    | RAPWFLFKQ. | .....      | GGV.           | SAEEAA | KDLVIILEVM | RVIAVALSPV |
| prma      | KQPWTLIKD. | .....      | EK..           | NIPLVS | NIIYNVLEST | RIVGLLLLPI |
| caelmt    | HAPWKLNW.. | .....      | ESP .E..       | DAPWLG | TVLHVALECL | RVFGTLLQPV |
| hosamt    | HAPWKLNW.. | .....      | ESP .V..       | DAPWLG | TVLHVALECL | RVFGTLLQPV |
| tarumt    | HAPWKLDR.. | .....      | KDS .A..       | DQRWLG | TIIHVSLECL | RIYGTLLQPV |
| drmemt    | SKPWTLKA.. | .....      | GAP DG..       | NQARLE | TIIAMTMDAL | RLSGIVLQPI |
| anga2     | TAPWKLKK.. | .....      | SDN PA..       | DRAKLN | TILSVTMEVL | RQAGIAAQPI |
| didimt    | QAPWKLVP.. | .....      | KPN RVGSDLIRLN |        | TIIYIAIEMI | .....      |
| caabmt    | AEPWTYVKLI | NSPETPAELK | EKY..          | RILNN  | YFVYLCAETT | RISSILIQPV |
| sacemt    | SKPWER.... | .....      | ELD QQ.....    | D      | NIIFLAMETS | RILSILCQSI |
| scpomt    | KEPWKLSD.. | .....      | DSQ EK.....    | I      | DTLMLVAHSL | RISGILLQPI |
| lema      | NAPWKLVK.. | .....      | MDT AR.....    | LG     | TVLYVTMEGL | RICTMFLQPV |
| myge      | FKPWELFKN. | .....      | QEF SL.....    | LK     | QLLFTCVRCV | QVCYVLLTPI |
| mypn      | LKPWELVKQ. | .....      | TDY TL.....    | LK     | QLLFACVRCT | QVCFVLLAPI |
| urur      | NKPWELAKN. | .....      | QQE QE.....    | LD     | SLLVHLVKVI | QVTTTLLSPI |
| mypu      | TRPWLLTK.. | .....      | ED QK.....     | LE     | IVLNRLNNGI | YAMAFELSIV |

901

950

|       |                  |             |          |       |       |            |
|-------|------------------|-------------|----------|-------|-------|------------|
| mask  | **.....          | .....       | ~        | ~~~~~ | ~~~~~ | ~~~~~      |
| stpn2 | IPFSGKKIED       | MFKTKLNTWN  | .....    | ..... | ..... | .....      |
| bace2 | LPFSSSERVRN      | TL SIVKRNWE | .....    | ..... | ..... | .....      |
| baan2 | LPFSSSERIRN      | TL SIVNRNWE | .....    | ..... | ..... | .....      |
| clpe2 | IPFTCEKIKM       | FLGIKDTKWS  | .....    | ..... | ..... | .....      |
| deet  | LP E S S R L S T | Y L G.....  | .....    | ..... | ..... | .....      |
| codi  | LPHIAQQVHE       | TLGRDGV..   | .....    | ..... | ..... | WA.....    |
| thnw  | IPSSAEKIWN       | MLG.....    | .....    | ..... | ..... | .....      |
| thvo  | TPTS AKAIWE      | QLG.....    | .....    | ..... | ..... | .....      |
| pogi  | LPFSSAKLMS       | MLSTDCPFG.  | .....    | ..... | ..... | WDR LGST   |
| bafr  | LPFSSERLRQ       | MLNMDS.FD.  | .....    | ..... | ..... | WAE LGRN   |
| cyhu  | IPFTSAKLFT       | MLNLKA.NT.  | .....    | ..... | ..... | WNNAGTI    |
| chte  | VPETANRIWK       | MLGFEGTIDE  | LVE..... | ..... | PG    | NPVWRQALEP |
| chmu  | MPETAWTIWG       | MIAPGS....  | .....    | ..... | ..... | .....      |
| chtr  | MPETALKILE       | MIAPHS....  | .....    | ..... | ..... | .....      |
| chpn  | IPESAVAIWE       | MISPKS....  | .....    | ..... | ..... | .....      |
| fugu  | MPTTTSQTIRD      | QLNCPQSVIG  | T.....   | ..... | ..... | MLRGNGNFV  |
| hosa  | MPTVSATIQA       | QLQLPPPACS  | I.....   | ..... | ..... | LLT...NFL  |
| anga  | MPTTARNMYS       | QLNVRGGFIN  | S.....   | ..... | ..... | DKP...LIR  |
| drme  | MPTTARTLFG       | QLNAKQTPLN  | .....    | ..... | ..... | AEP...LVT  |
| sace  | MPEIGE KINK      | MLNAPALKID  | D.....   | ..... | ..... | RFHL.....  |
| scpo  | MPSTSTSIYK       | QLNAPAAAIP  | D.....   | ..... | ..... | TWEL.....  |
| didi  | IPSLTDKVHQ       | QLNVEPTKYS  | T.....   | ..... | ..... | HFDIN..... |

|       |             |            |            |            |            |            |
|-------|-------------|------------|------------|------------|------------|------------|
| arth  | MPSFSCEVFK  | QLNLPPQFSL | S.....     | .....      | DER        | GEVLLASRPW |
| orsa  | MPSFSNEVLL  | QLNMTPEESL | SFC.....   | .....      | DDK        | GEIAKAKRPW |
| cael  | MPTISATIRE  | QCGLP...AL | P.....     | .....      | ...        | LFTPFPI    |
| encu  | IPVTSLEILR  | MCNLEETMFP | ES.....    | .....      | .....      | .....      |
| trde  | MP.....     | .....      | .....      | .....      | .....      | .....      |
| trpa  | LPWYTQQAAR  | FLGVQLSSCA | PEGGGAVCAA | KKDADTAQPD | TVQPTLRWSD |            |
| bobu  | IPETSKKIQQ  | FFGN.....  | .....      | .....      | ..         | SYQFSTKI   |
| cacr  | IPFAAEKIGD  | AFGLDFPASW | P.....     | .....      | .SND.      | AKAEL      |
| suto  | MPKSAEKLYN  | MLGFK.DIE. | .....      | .....      | .REK       | WDLAGE     |
| suso  | MPSHAQKIYE  | MLNMG.NIE. | .....      | .....      | .NEK       | WDVAST     |
| aepe  | TPDAADRLWS  | MLGLAGSVH. | .....      | .....      | .EAV       | WDEWLD     |
| pyba  | IPESAEQLWK  | MMGLD..A.. | .....      | .....      | .PLT       | WEEAKR     |
| pyho  | LPDASEKIWH  | LLNLD..... | .....      | .....      | ...EV      | KKWKWF     |
| pyab  | LPDASEKIWH  | LLNLD..... | .....      | .....      | ...EV      | KRWEF      |
| pyfu  | LPDASEKIWH  | FLNLE..... | .....      | .....      | ...EV      | KTWRF      |
| meja  | MPKKSALLE   | LMNEE..... | .....      | .....      | ...LDL.    | EL         |
| meth  | MPSAAGRILS  | IMNLE..... | .....      | .....      | ...DEA.    | WGF        |
| arfu  | MPESMERMAK  | AIGLD..LE. | .....      | .....      | ...NV      | RLSDA      |
| hanrc | LPEKTETLWA  | QLGEDGRVS. | .....      | .....      | ...DATI    | ADC        |
| psfl  | LPVLAADAEA  | FLNV.....  | .....      | .....      | ..A        | PLTWNDH    |
| psae  | LPKLAATAEA  | FLNV.....  | .....      | .....      | ..A        | PLTWADH    |
| esco  | LPKLTERAEA  | FLN.....   | .....      | .....      | ..TEL      | TWDGI      |
| saty  | LPTLERVEA   | FLN.....   | .....      | .....      | ..SEL      | NWDAI      |
| yepe  | XPSLTERTEA  | FLN.....   | .....      | .....      | ..TEL      | TWDSI      |
| vich  | MPALAEERTEA | FLN.....   | .....      | .....      | ..QEL      | TWEGV      |
| haein | LPKLAERAET  | FLQ.....   | .....      | .....      | ..AEL      | RWDNI      |
| acac  | LPKLAERAEA  | FLQ.....   | .....      | .....      | ..SKL      | TWANL      |
| pamu  | IPQIIARAEA  | FLQ.....   | .....      | .....      | ..DEL      | TWESL      |
| neme  | LPQTAANAAR  | FLNL.....  | .....      | .....      | ..EAI      | TWANT      |
| nogo  | LPQTAANAAR  | FLNL.....  | .....      | .....      | ..DAI      | TWKNT      |
| xyfa  | LPHTSIQAET  | FLAA.....  | .....      | .....      | ..PVT      | AWQDV      |
| buAPS | VPDLAIKTES  | FLI.....   | .....      | .....      | ..SKL      | TWDGI      |
| sime  | MPESAGKLLD  | LVAVPTD... | .....      | .....      | RRDF       | AHLGEAGR.. |
| agtu  | MPQSCEKLLD  | LVAAPAD... | .....      | .....      | GRDF       | TALGEAGR.. |
| brsu  | IPQSAEKLLD  | ILAVPAD... | .....      | .....      | KRQF       | ADVLAS.P.. |
| melo  | IPGSAEKLLD  | LLAVPAD... | .....      | .....      | KRDF       | VHVHADYA.. |
| rhpa  | IPTAAKLLD   | ILGIAEG... | .....      | .....      | QRDF       | AALATR.... |
| mytu  | MPESAGKILD  | LLGQAPN... | .....      | .....      | QRSF       | AAVGVR.... |
| rhru  | VPASAARMLD  | QLGQGPE... | .....      | .....      | ARDT       | TALGDRPL.. |
| noar  | VPAAAAKVLD  | QLGIPRE... | .....      | .....      | ARGF       | DALTDADWYM |
| rico  | IPSSANKMLD  | QLGVNKE... | .....      | .....      | ERLF       | KHLIRDYT.. |
| ripr  | VPNSANKMLD  | QLGVSKE... | .....      | .....      | ERLF       | KHLVRDHA.. |
| plyo  | VPMIASNIFS  | QLNTPKKK.. | .....      | .....      | IVDL       | NPWLNN.... |
| plfa  | IPSLSHKIFE  | KLNTPKKV.. | .....      | .....      | IADL       | SPWLNN.... |
| clpel | LTETSVKINA  | QLNTKVTT.. | .....      | .....      | WESL       | K.....EF   |
| clac  | LPETGEKIKT  | QLNIELDT.. | .....      | .....      | WESL       | S.....AF   |
| liin  | LTRTPGEIFL  | QLGLQEEN.. | .....      | .....      | LKKW       | DS....IYGY |
| limo  | LTRTPGEIFL  | QLGLQEEN.. | .....      | .....      | LKKW       | DS....IYGY |
| baan1 | LTVAPSKMFA  | QLGLTDEA.. | .....      | .....      | HTSW       | GS....LSTI |
| bacel | LTVAPSKMFA  | QLGLTEEA.. | .....      | .....      | HTSW       | ES....LSTI |
| basu  | LTKTPEKMFE  | QLGITDES.. | .....      | .....      | LKAW       | DS....ITAF |
| bast  | LTRTPERIFT  | QLGISDRS.. | .....      | .....      | LKEW       | DS....LYDF |

|          |            |            |        |       |        |            |       |
|----------|------------|------------|--------|-------|--------|------------|-------|
| baha     | MTKAPQKIWE | QLGIDS.S.. | .....  | ..... | LTTW   | ES....     | LETF  |
| enfa     | MTETPGKIFE | QLGLDPET.. | .....  | ..... | MNME   | N.....     | IHF   |
| ocih     | LTHAPKKIAE | QLGLGEEY.. | .....  | ..... | GLDW   | G.....     | TIGF  |
| stpy     | MMETSAAIMA | QLGLEP.V.. | .....  | ..... | SDLS   | T.....     | LAL   |
| stpn     | MMETSRAVLT | QLGLEE.V.. | .....  | ..... | SSLE   | N.....     | LSL   |
| stmu     | MMTTSNAIME | QLGLAG.Q.. | .....  | ..... | FDLE   | G.....     | LEL   |
| lala     | MRATSGKIFE | QLGMDERS.. | .....  | ..... | FSLE   | N.....     | LSF   |
| stau     | LTHAPKEIFE | QLNINNPQ.. | .....  | ..... | FMEF   | SS....     | LAQY  |
| oeoe     | LTQAPKKIFD | QLGLPE.V.. | .....  | ..... | EPIS   | N.....     | LNf   |
| thma     | MPDTSEEVFR | RVSFEE.... | .....  | ..... | KPSK   | EH....     | LENW  |
| thth     | MPDKMAELRR | ALGLKEEV.. | .....  | ..... | RLEE   | AE....     | R..W  |
| dera     | IPTKAKELRE | QLGLGRQG.. | .....  | ..... | YPLQ   | AA.....    | W     |
| stco     | MPDTSQKLWD | SLGAEPSLGA | .....  | ..... | LADQHV | QD....     | AADW  |
| hepyj99  | MPKSAMKLAS | AFRVE..IT. | .....  | ..... | PNNY   | ER....     | FFKA  |
| hepy2695 | MPKSAVKLAN | AFNTE..IT. | .....  | ..... | PDNY   | ER....     | FFKA  |
| caje     | LPKSSQKVAL | ALNFE..IS. | .....  | ..... | SANY   | TK....     | MILD  |
| aqae     | TPN.KMKEAL | QM.....LG. | .....  | ..... | EKEF   | LK....     | ELKP  |
| funu     | MPESAQKISN | QLGIDKDIT. | .....  | ..... | NLKF   | DD....     | IKEW  |
| trer     | IPNISNAIYQ | QLGFSNNFND | .....  | ..... | KSAINS | SETFVKQVSW |       |
| sy6803   | VPRLSTKIYQ | QLGFTWDFDQ | W..... | ..... | RSPLEQ | AEEFNHRHQS | W     |
| arth_1   | APCLSLRIYS | QLGYTEDQFN | .....  | ..... | SITW   | S.....     | DTKW  |
| prma     | LPNLSSKIDQ | QLGLLYNEKG | .....  | ..... | SW     | K....      | KQLDW |
| caelmt   | TPNLADKLLS | RLGVSTTE.. | .....  | ..... | RGLGE  | LYFLPRFYGH |       |
| hosamt   | TPSLADKLLS | RLGVSASE.. | .....  | ..... | RSLGE  | LYFLPRFYGH |       |
| tarumt   | VPEISNKLLS | RLGVQPHE.. | .....  | ..... | RSWTN  | LNFLPRFEGK |       |
| drmemt   | IPQLANRLLD | KLSVPTAQ.. | .....  | ..... | RGWNY  | LAESFATSPN |       |
| anga2    | VPGLSKQLLD | KLQIVPTA.. | .....  | ..... | RRWND  | LQVSFRT... |       |
| didimt   | .....      | .....      | .....  | ..... | .....  | .....      | ..... |
| caabmt   | MPQLSKKILD | RLNVSG.... | .....  | ..... | RTSEF  | TT.LSADLQY |       |
| sacemt   | IPSLSQSFLD | RIDVSKEK.. | .....  | ..... | RTINY  | AR.LGSDKTY |       |
| scpomt   | MPTKSTELLD | QLGIPKNQ.. | .....  | ..... | RSLQN  | ATNVFEPTEF |       |
| lema     | MPQKAKEIMD | ALGVPEAA.. | .....  | ..... | R.VGM  | ENYLFIVKPK |       |
| myge     | LVNTASKVFH | LFNFADDA.. | .....  | ..... | CRKDQ  | LRDATLLKKI |       |
| mypn     | LVHTSTQIFD | LFNFSAQA.. | .....  | ..... | RSKTH  | LADPQQLQKI |       |
| urur     | LIEGSKKAVE | QLNFDESf.. | .....  | ..... | LTLAS  | LASYDIFNYH |       |
| mypu     | MPQTSQKLAK | ALGFES.... | .....  | ..... | FEKSK  | LEDFKKFDNI |       |

951

1000

|       |            |            |            |       |       |       |       |
|-------|------------|------------|------------|-------|-------|-------|-------|
| mask  | ~~~~~      | ~~~~~      | ~~~~~      | ~~~~~ | ~~~~~ | ~~~~~ | ~~~~~ |
| stpn2 | .YISNLP... | ...NKLSDVS | MLFDRIDL.. | ..... | ..... | ..... | ..... |
| bace2 | .PQNTLP... | ...NRIDSVQ | PLFERIDV.. | ..... | ..... | ..... | ..... |
| baan2 | .PQHTLP... | ...SRIDSVQ | PLFERIDV.. | ..... | ..... | ..... | ..... |
| clpe2 | .FKERKN... | ...IRVNRVE | FLFDKIDK.. | ..... | ..... | ..... | ..... |
| deet  | .....      | .....      | .....      | ..... | ..... | ..... | ..... |
| codi  | .....A...  | ...KPQIVE. | VT.DDMPV.. | ..... | ..... | ..... | ..... |
| thnw  | .....      | .....      | .....      | ..... | ..... | ..... | ..... |
| thvo  | .....      | .....      | .....      | ..... | ..... | ..... | ..... |
| pogi  | DLLPEGH... | ...VLGNPE. | LLFEKLED.. | ..... | ..... | ..... | ..... |
| bafr  | DLLPAGH... | ...QLNKPE. | LLFEKIED.. | ..... | ..... | ..... | ..... |
| cyhu  | DLLKAGD... | ...QLGTAE. | LLFDKIED.. | ..... | ..... | ..... | ..... |
| chte  | GLKKGHK... | ...LLGSSE. | ILFSKIED.. | ..... | ..... | ..... | ..... |
| chmu  | .....L...  | ...DLRSQD. | P..ERLQS.. | ..... | ..... | ..... | ..... |

|       |            |            |             |            |            |
|-------|------------|------------|-------------|------------|------------|
| chtr  | .....L...  | ...DLGSQD. | P..DRLQS..  | .....      | .....      |
| chpn  | .....L...  | ...ENCNLD. | T..MYARD..  | .....      | .....      |
| fugu  | CALGAGH... | ...RVGAVS. | PLFQKLEG..  | .....      | .....      |
| hosa  | CTLPAGH... | ...QIGTVS. | PLFQKLEN..  | .....      | .....      |
| anga  | TLLPTGH... | ...RIGKPA. | VLFTKIED..  | .....      | .....      |
| drme  | LLLPAQH... | ...QIGKPA. | PLFAKLEQ..  | .....      | .....      |
| sace  | .AILEGH... | ...NINKAE. | YLFQRIDE..  | .....      | .....      |
| scpo  | .CLLPGH... | ...RIGEPE. | YLFTRIDE..  | .....      | .....      |
| didi  | .AIPAGH... | ...EISK... | EILPLVKK..  | .....      | .....      |
| arth  | DILPPSH... | ...RIGTPQ. | PLFKELEN..  | .....      | .....      |
| orsa  | DFVSAGH... | ...KIGKPS. | PLFKELKD..  | .....      | .....      |
| cael  | CYLKAGH... | ...KIGQPS. | PLFQKLDP..  | .....      | .....      |
| encu  | MRIVDGH... | ...TMGSDIR | PLFEDFTT..  | .....      | .....      |
| trde  | .....      | .....      | .....       | .....      | .....      |
| trpa  | VGERKGL... | ...TQVHPPV | ILFRPLET..  | .....      | .....      |
| bobu  | LGTKSGI... | ...KKIEFTE | ILFNKLEQ..  | .....      | .....      |
| cacr  | NTLSVGR... | ...PITVPE. | VLFKKIED..  | .....      | .....      |
| suto  | LVIKSNH... | ...KINEVS. | VLFKKVEL..  | .....      | .....      |
| suso  | LSVNPQH... | ...KIGKVN. | VLFKKLEP..  | .....      | .....      |
| aepe  | RPLPGA...  | ...RIVRVE. | PLFQKLPD..  | .....      | .....      |
| pyba  | PPAVG.K... | ...ALGEVR. | PLFRKITE..  | .....      | .....      |
| pyho  | KELPAGH... | ...RVRKAE. | ILFKKVTDEQ  | IIYFILNYMG | RNNPEGAKML |
| pyab  | RELPAGH... | ...KVRKPE. | ILFKKVTDDQ  | IIYFILNYMA | KGNPEGARIL |
| pyfu  | TELPAGH... | ...KVRKPE. | ILFKKASDDQ  | IIYFILNYMG | RNNPDAAREL |
| meja  | R....GN... | ...ELKKPK. | IIFKKIDN..  | .....      | .K.....    |
| meth  | HELREGQ... | ...VIERAK. | PLFSKITD..  | .....      | .....      |
| arfu  | YKVDEVM... | ...KLSKPE. | VPFKVED..   | .....      | .E.....    |
| hanrc | LQAPP.A... | ...EFGPEA. | ELFEKIED..  | .....      | .D.....    |
| psfl  | TLLAN....  | ...HQLNEFK | PLMTRIDP..  | .....      | .....      |
| psae  | QTLLAN.... | ...HQLNPFQ | PLMTRIEP..  | .....      | .....      |
| esco  | QQPLLG.... | ...HKVNPFK | ALYNRIDM..  | .....      | .....      |
| saty  | EQPLLS.... | ...HKVNTFK | ALYNRIDM..  | .....      | .....      |
| yepe  | EQPLLG.... | ...HSITAFK | ALFNRIDL..  | .....      | .....      |
| vich  | ATPLTD.... | ...HAVTPFK | ALFNRIDP..  | .....      | .....      |
| haein | HQPLLG.... | ...HTLAPFK | ALFSRLEK..  | .....      | .....      |
| acac  | AQPLLN.... | ...HPIAPFK | ALFSRLDG..  | .....      | .....      |
| pamu  | NRPLLN.... | ...HAILPFK | ALAQRLLD..  | .....      | .....      |
| neme  | RETLGK.... | ...HAINKYE | HLMQRVEQ..  | .....      | .....      |
| nogo  | RETLGE.... | ...HAINKYE | HLMQRVEQ..  | .....      | .....      |
| xyfa  | NQPLIGG... | ...HTIHPYS | PLFTRIDK..  | .....      | .....      |
| buAPS | KKPLLS.... | ...HQINKFF | PLYKRIDV..  | .....      | .....      |
| sime  | ..LVSG.... | ...TPLEAPK | PVFPRYVAP.. | .....      | .....      |
| agtu  | ..LAPG.... | ...TPLEAPK | PVFPRYVAP.. | .....      | .....      |
| brsu  | ..LAGG.... | ...TDLPAQ  | PVFPRYVEA.. | .....      | .....      |
| melo  | ..LVPG.... | ...TALPAPE | GVFPRYVEQ.. | .....      | .....      |
| rhpa  | ..IVPG.... | ...TPLPAPA | PIFPRYVEP.. | .....      | .....      |
| mytu  | ..LTPG.... | ...TALPPPT | GVFPRYQPP.. | .....      | .....      |
| rhru  | ..LAPG.... | ...TVLPKPE | GIFPRHVVD.. | .....      | .....      |
| noar  | ARVATG.... | ...ERLAQPM | PAFPRLELP.. | .....      | .....      |
| rico  | ..LTAG.... | ...SNILEPT | IIFPKFE...  | .....      | .....      |
| ripr  | ..LKAG.... | ...SNILEPS | IIFPKFN...  | .....      | .....      |
| plyo  | ..LQEG.... | ...VIINNDN | VLFKKFEVE.. | .....      | .....      |

|           |            |             |             |       |       |
|-----------|------------|-------------|-------------|-------|-------|
| plfa      | ..LTEG.... | ...VIINNDN  | ILFKKYEVE.  | ..... | ..... |
| clpe1     | NGTVAG.... | ...DKVVKGD  | VIFPRIDVE.  | ..... | ..... |
| clac      | DGTRAG.... | ...TKVSKGE  | VIFPRIDVD.  | ..... | ..... |
| liin      | GEIPEGT... | ...TVVKKGT  | PIFPRLDAE.  | ..... | ..... |
| limo      | GEIPAGT... | ...TVVKKGT  | PIFPRLDAE.  | ..... | ..... |
| baan1     | GCIPAG.... | ...TKVEKGQ  | PIFPRLEMD.  | ..... | ..... |
| bacel     | GCIPAG.... | ...TKVEKGN  | PIFPRLEME.  | ..... | ..... |
| basu      | GQLKD..... | ...TKVQKGE  | PLFPRLEAE.  | ..... | ..... |
| bast      | GLIPEG.... | ...TNVQKGE  | PLFPRLDIG.  | ..... | ..... |
| baha      | GQIPGN.... | ...TNVQKGQ  | PLFPRLDVE.  | ..... | ..... |
| enfa      | GEFPTDV... | ...TVTSKGT  | PIFPRLEIE.  | ..... | ..... |
| ocih      | GNFPEPT... | ...TVVKKGT  | PIFPRLDLD.  | ..... | ..... |
| stpy      | ADFPANT... | ...KVVAKGT  | PIFPRLDME.  | ..... | ..... |
| stpn      | ADFPADV... | ...TVVAKGT  | PIFPRLNME.  | ..... | ..... |
| stmu      | AGLPTGV... | ...KVIKGT   | PIFPRLDMD.  | ..... | ..... |
| lala      | G.YSFTH... | ...PVVAKGQ  | PIFPRLDVE.  | ..... | ..... |
| stau      | GVLTEPI... | ...MVTGQPK  | PIFPRLDSE.  | ..... | ..... |
| oeoe      | ADIPSGI... | ...KVVEHPT  | PLFPRLDVK.  | ..... | ..... |
| thma      | GVLKPG.... | ...STVIHGE  | PLFKKIDAK.  | ..... | ..... |
| thth      | GLAEPR.... | ...PIPEEAP  | VLFPKKE...  | ..... | ..... |
| dera      | GLTPAG.... | ...TRVQGGG  | ILFPKPEPK.  | ..... | ..... |
| stco      | GRLPAG.... | ...ATVTKGA  | VLFPRL...   | ..... | ..... |
| hepyj99   | KKLQD..... | ...MVLQDTE  | PLFSKIEKI.  | ..... | ..... |
| hepy26695 | KKLQD..... | ...MILQDTE  | PLFSKMEKI.  | ..... | ..... |
| caje      | NELLD..... | ...FKANPCE  | ALFPKVEKA.  | ..... | ..... |
| aqae      | YSKNT..... | ...YKLGERR  | ILFPKREG... | ..... | ..... |
| funu      | SIFKEG.... | ...HKLGEAS  | PIFPRIEIE.  | ..... | ..... |
| trer      | GALPGN.... | ...QLLGQPQ  | PIFQRIDMI.  | ..... | ..... |
| sy6803    | GQLGAN.... | ...QNLPPAQ  | PIFTKLELP.  | ..... | ..... |
| arth_1    | GGLKGG.... | ...QVMEQAS  | PVFARIELN.  | ..... | ..... |
| prma      | GKLIHE.... | ...SILPAPN  | PVIEKLEYE.  | ..... | ..... |
| caelmt    | PCPFEG.... | ...RKLGPDTG | LLFPR.LDQ.  | ..... | ..... |
| hosamt    | PCPFEG.... | ...RRLGPETG | LLFPR.LDQ.  | ..... | ..... |
| tarumt    | DCPFEG.... | ...RALGSDSG | VLFSR.LES.  | ..... | ..... |
| drmemt    | SSNSPAGLGE | SRQLDGQ TSA | LLFQRILEE.  | ..... | ..... |
| anga2     | .....      | .....       | .....       | ..... | ..... |
| didimt    | .....      | .....       | .....       | ..... | ..... |
| caabmt    | GSGANS.... | .....KSH    | KVPLEKIAP.  | ..... | ..... |
| sacemt    | GKQSNK.... | .....KGR    | EVPLKKIPF.  | ..... | ..... |
| scpomt    | TFHSGN.... | .....NSH    | LFDKRTQ...  | ..... | ..... |
| lema      | GTKIAG.... | .....LAEGQ  | VVFQKVTLP.  | ..... | ..... |
| myge      | IISNSM.... | .....E      | VLFKRVD...  | ..... | ..... |
| mypn      | SLAPVI.... | .....Q      | PLFKRLD...  | ..... | ..... |
| urur      | KVNDS....  | .....K      | PIFARIIVE.  | ..... | ..... |
| mypu      | KIEKI..... | .....E      | NLFNRIKL..  | ..... | ..... |

1001

1050

|       |         |            |          |        |       |
|-------|---------|------------|----------|--------|-------|
| mask  | ~~~~~   | ~~~~~      | ~~~~~    | ~~~~~  | ~~~~~ |
| stpn2 | .....KK | IDEEVLELQQ | T.....SS | R..... | ..... |
| bace2 | .....KQ | IECEIEKLYG | A.....VK | .....  | ..... |
| baan2 | .....KQ | IECELEKLYG | A.....VK | .....  | ..... |
| clpe2 | .....KV | AIEELNRLKN | K.....KI | .....  | ..... |

|       |            |            |             |            |            |       |
|-------|------------|------------|-------------|------------|------------|-------|
| deet  | .....      | FGSEIEKDG. | .....       | .....      | .....      | ..... |
| codi  | .....EP    | IGVGIPEAGQ | T.....YP    | VIMGDYAAQQ | AR.....    | ..... |
| thnw  | .....      | IPFAIGQS.. | .....       | .....      | .....      | ..... |
| thvo  | .....      | VNMDIDSS.. | .....       | .....      | .....      | ..... |
| pogi  | .....SV    | IDAQIQKLQD | T.....KL    | ANEKAAHQAA | PI.....    | ..... |
| bafr  | .....AT    | IEAQVQKLLD | T.....KK    | ANEEANYKAK | PI.....    | ..... |
| cyhu  | .....AT    | IEAQVKKLED | T.....KQ    | ANLLANAEVK | PL.....    | ..... |
| chte  | .....KD    | IEPEMKKIEA | L.....LA    | EAEQREAAKQ | PVPMT..... | ..... |
| chmu  | .....IW    | TEAFFDYSE. | .....       | .....      | .E.....    | ..... |
| chtr  | .....LW    | TDSFFDYSE. | .....       | .....      | .E.....    | ..... |
| chpn  | .....LW    | KEEILDVIN. | .....       | .....      | .E.....    | ..... |
| fugu  | .....DQ    | IEALKKRFSG | Q.....QA    | ATAPAPAAEA | T.....     | ..... |
| hosa  | .....DQ    | IESLRQRFGG | G.....QA    | KTSPKPAVVE | T.....     | ..... |
| anga  | .....AR    | IEELKQKYGG | V.....QQ    | DKDKSPAPVK | APQGFTS... | ..... |
| drme  | .....SF    | IDELKGKYGG | A.....Q.    | .....      | .....      | ..... |
| sace  | .....KK    | IDEWRAKYGG | Q.....QV    | .....      | .....      | ..... |
| scpo  | .....SM    | EEEWRSKYGG | N.....GS    | N.....     | .....      | ..... |
| didi  | .....IE    | ADDLK..... | .....       | .....      | .....      | ..... |
| arth  | .....DE    | VARYREKFAG | S.....QS    | DR....RARD | EAAN.....  | ..... |
| orsa  | .....EE    | VESFRNKFAG | S.....QA    | ERSSKAQADA | EAKK.....  | ..... |
| cael  | .....AQ    | IAEFKAKFGG | S.....QD    | AQSSAPKTAE | KPKQQKKQAP | ..... |
| encu  | .....EQ    | IEEMK.RYDR | P.....QS    | TGCSK..... | .....      | ..... |
| trde  | .....      | .....      | .....       | .....      | .....      | ..... |
| trpa  | .....ET    | IAAYRARYAG | T.....AR    | DGAGVSVPRT | AQMPT.G... | ..... |
| bobu  | .....KK    | INNLKLYS.  | .....       | .G.....    | .....      | ..... |
| cacr  | .....EQ    | IAEWTARFGG | A.....E.    | .....      | .....      | ..... |
| suto  | .....NE    | .....      | .....       | .....      | .....      | ..... |
| suso  | .....EF    | ESKIKDKLEK | I.....RK    | DIEKIRPTLL | K.....     | ..... |
| aepe  | .....DF    | LERVDEIVED | A.....RR    | RAREKRPPLL | RD.....    | ..... |
| pyba  | .....EE    | VKALLAKLEE | L.....RN    | QKYSRKYPWE | QVVI.....  | ..... |
| pyho  | LEKYYKREDV | IKVAKEKFGE | E.SKIILKRI  | YKDIKLEEGK | EEKEME.... | ..... |
| pyab  | LDKYYKREDV | IRVAKEKFGD | E.AEVLRRV   | YKDIKLKEKK | EGKEM....  | ..... |
| pyfu  | LEKYYKLEDV | EKVAIEKFGE | EDGRFMLKKI  | FKEKYKGEKK | GEQKMQ.... | ..... |
| meja  | .....K.... | IEEMK..... | .....KKL    | YENKK.EETK | GGEKME.... | ..... |
| meth  | .....      | .....      | .....EA     | IEEEKAKLIE | EDDEVE.... | ..... |
| arfu  | .....VIEKL | QKVMKRFRG  | E.....GEK   | MEQK.....  | .....      | ..... |
| hanrc | .....RVTEL | DEALAAKIEA | ASSEDADGEG  | MADETADDGI | ELEPLAE... | ..... |
| psfl  | .....VK    | VQAMTDASKE | DLTASQT.DT  | GAAAPAGNGE | ...LA..... | ..... |
| psae  | .....AK    | VEAMIEASKE | DLAA....AS  | ...QPAGNGE | ...LV..... | ..... |
| esco  | .....RQ    | VEALVEASKE | EVKAAAAPVT  | GP.....    | ...LA..... | ..... |
| saty  | .....KQ    | VEALVEASKE | EVK.....    | .....      | .....      | ..... |
| yepe  | .....DK    | VNEMVASSKE | DMAPATR.VT  | GP.....    | ...LA..... | ..... |
| vich  | .....KQ    | VEAMIEASKA | EAAAEEKAAAD | AAKPKSAETE | ...LS..... | ..... |
| haein | .....KQ    | IDAVVEETKA | LFAAANK.AA  | EKTEAKPTAL | ...SA..... | ..... |
| acac  | .....KQ    | IEAMIEASKA | ENAQVNAPAT  | AKSAVKNTGE | ...SAGG... | ..... |
| pamu  | .....KQ    | IEAIVNETKE | QFVAQQA.LE  | QKNSAKAEP  | ...SQ..... | ..... |
| neme  | .....KQ    | VDDLIEANKQ | SIQTTAPAA   | E.....E    | ...SQ..... | ..... |
| nogo  | .....KQ    | VDDLIEANKQ | SIQTASAP.V  | E.....E    | ...GK..... | ..... |
| xyfa  | .....KV    | IEVMINASKD | TLAPPPASAK  | QQNASMSNTA | PPPTAEK... | ..... |
| buAPS | .....EK    | MFEFMNOCR. | .....       | .....      | .....      | ..... |
| sime  | .....EA    | .....      | .....       | .....      | .....      | ..... |
| agtu  | .....EA    | .....      | .....       | .....      | .....      | ..... |

```

brsu .....DE QN.....
melo .....PG ANA.....
rhpa .....AT A.....
mytu .....QP PEGK.....
rhru .....DE GAA.....
noar .....EE EGSA.....
rico .....
ripr .....
plyo .....TA KIKIQKVIMK LSKVIKVIEH GELKNSTIYE IETDDGKYIA
plfa .....TA KIKLQKVIIR VCKIVNIINT ESSQNTTICE IEVDNDKITA
clpel .....EK LAELEALKPA PV.....K PANE.....E
clac .....KK IEELNKLKEE QL.....K AT.....R
liin .....VE VTYIQDEMKG SA.....P APAE.....E
limo .....VE VTYIQDEMKG SA.....P APAE.....E
baan1 .....VE VAYIKEQMKA SA.....P KVEE.....K
bacel .....VE VAYIKEQMKA SA.....P KVEE.....K
basu .....EE IAYIKGKMQG SA.....P AKEE.....T
bast .....VE VEYIKAHMQG GK.....PAEA.....A
baha .....EE VAHIKSLMGG SK.....K PEEA.....P
enfa .....TE VTYIQKKMSQ SE.....S ATEED.....IKWN
ocih .....EE AAYIRDQMAN GA.....NA ASSED.....ETGDWD
stpy .....AE IDYIKAQMGD SS.....A ISQE.....KEWV
stpn .....EE IAYIKEQME GN.....K PAVE.....KEWN
stmu .....EE IAYIKEQMGD NS.....A IAQEE.....E KEWN
lala .....EE VAYIKLQMAG G.....VLPE.....KEWV
stau .....AE IAYIKESMQP P.....ATEE.....E
ocoe .....KE VEFISGLVQK DT.....K GKGRA.....R MEAA
thma .....DF KKVVETVSAE QN.....
thth .....AKVEAKP.....
dera .....AD ETKNAEAKPP KP.....Q AKKEK.....K TVTDTAPAKT
stco .....
hepyj99 .....EK IEKIEKIEKI EKGEALAEK AEKK.....E
hepy26695 .....EK TEKAGEASPE KN.....EK EKKD.....A
caje .....LL KQEIKEEP.. K.....
aqae .....
funu .....KEEIVETK.. ..KE.....L
trrer .....
sy6803 .....AE E.....
arth_1 .....PE KEEDEKKPKV G.....
prma .....
caelmt .....SR TRLVKAHRT.....
hosamt .....SR TWLVKAHRT.....
tarumt .....QR ADQQKNRKME KGSNLK.....
drmemt .....TS AKEVKEQKPQ PAKRSKSKKK ERRETMS.....
anga2 .....
didimt .....
caabmt .....RD IK.....
sacemt .....RL QEEQTNMRS.....
scpomt .....
lema .....TE EGERSSKGQ.....
myge .....
mypn .....

```



|       |            |            |            |             |            |
|-------|------------|------------|------------|-------------|------------|
| urur  | .....KQ    | .....      | .....      | .....       | .....      |
| mypu  | .....      | .....      | .....      | .....       | .....      |
|       | 1051       |            |            |             | 1100       |
| mask  | ~~~~~      | ~~~~~      | ~~~~~      | ~~~~~       | ~~~~~      |
| stpn2 | .....      | .....      | .....      | .....       | .....      |
| bace2 | .....      | .....      | .....      | .....       | .....      |
| baan2 | .....      | .....      | .....      | .....       | .....      |
| clpe2 | .....      | .....      | .....      | .....       | .....      |
| deet  | .....      | .....      | .....      | .....       | .....      |
| codi  | .....      | .....      | .....      | .....       | .....      |
| thnw  | .....      | .....      | .....      | .....       | .....      |
| thvo  | .....      | .....      | .....      | .....       | .....      |
| pogi  | .....      | .....      | .....      | .....       | .....      |
| bafr  | .....      | .....      | .....      | .....       | .....      |
| cyhu  | .....      | .....      | .....      | .....       | .....      |
| chte  | .....      | .....      | .....      | .....       | .....      |
| chmu  | .....      | .....      | .....      | .....       | .....      |
| chtr  | .....      | .....      | .....      | .....       | .....      |
| chpn  | .....      | .....      | .....      | .....       | .....      |
| fugu  | .....      | .....      | .....      | .....       | .....      |
| hosa  | .....      | .....      | .....      | .....       | .....      |
| anga  | .....      | .....      | .....L     | KDAQKAVDEQ  | AAKVRKIKSS |
| drme  | .....      | .....      | .....      | .....       | .....      |
| sace  | .....      | .....      | .....      | .....       | .....      |
| scpo  | .....      | .....      | .....      | .....       | .....      |
| didi  | .....      | .....      | .....      | .....       | .....      |
| arth  | .....      | .....      | .....L     | ADQLNK..... | .....      |
| orsa  | .....      | .....      | .....V     | ADKLKG..... | .....      |
| cael  | TKDKKGDKKM | ASTAAFVELE | QGAKVISQLI | AQNLKKFDQA  | KALFTRNQLQ |
| encu  | .....      | .....      | .....      | .....       | .....      |
| trde  | .....      | .....      | .....      | .....       | .....      |
| trpa  | .....      | .....      | .....      | .....       | .....      |
| bobu  | .....      | .....      | .....      | .....       | .....      |
| cacr  | .....      | .....      | .....      | .....       | .....      |
| suto  | .....      | .....      | .....      | .....       | .....      |
| suso  | .....      | .....      | .....      | .....       | .....      |
| aepe  | .....      | .....      | .....      | .....       | .....      |
| pyba  | .....      | .....      | .....      | .....       | .....      |
| pyho  | .....      | .....      | .....      | .....       | .....      |
| pyab  | .....      | .....      | .....      | .....       | .....      |
| pyfu  | .....      | .....      | .....      | .....       | .....      |
| meja  | .....      | .....      | .....      | .....       | .....      |
| meth  | .....      | .....      | .....      | .....       | .....      |
| arfu  | .....      | .....      | .....      | .....       | .....      |
| hanrc | .....      | .....      | .....      | .....       | .....      |
| psfl  | .....      | .....      | .....      | .....       | .....      |
| psae  | .....      | .....      | .....      | .....       | .....      |
| esco  | .....      | .....      | .....      | .....       | .....      |
| saty  | .....      | .....      | .....      | .....       | .....      |
| yepe  | .....      | .....      | .....      | .....       | .....      |
| vich  | .....      | .....      | .....      | .....       | .....      |

|           |               |       |       |       |       |
|-----------|---------------|-------|-------|-------|-------|
| haein     | .....         | ..... | ..... | ..... | ..... |
| acac      | .....         | ..... | ..... | ..... | ..... |
| pamu      | .....         | ..... | ..... | ..... | ..... |
| neme      | .....         | ..... | ..... | ..... | ..... |
| nogo      | .....         | ..... | ..... | ..... | ..... |
| xyfa      | .....         | ..... | ..... | ..... | ..... |
| buAPS     | .....         | ..... | ..... | ..... | ..... |
| sime      | .....         | ..... | ..... | ..... | ..... |
| agtu      | .....         | ..... | ..... | ..... | ..... |
| brsu      | .....         | ..... | ..... | ..... | ..... |
| melo      | .....         | ..... | ..... | ..... | ..... |
| rhpa      | .....         | ..... | ..... | ..... | ..... |
| mytu      | .....         | ..... | ..... | ..... | ..... |
| rhru      | .....         | ..... | ..... | ..... | ..... |
| noar      | .....         | ..... | ..... | ..... | ..... |
| rico      | .....         | ..... | ..... | ..... | ..... |
| ripr      | .....         | ..... | ..... | ..... | ..... |
| plyo      | LLNLPHNEN.    | ..... | ..... | ..... | ..... |
| plfa      | VLYLPYNNNN N. | ..... | ..... | ..... | ..... |
| clpel     | LVENP.....    | ..... | ..... | ..... | ..... |
| clac      | .KMQP.....    | ..... | ..... | ..... | ..... |
| liin      | TAEVEAL...    | ..... | ..... | ..... | ..... |
| limo      | VAEVEAL...    | ..... | ..... | ..... | ..... |
| baan1     | KEEEP.....    | ..... | ..... | ..... | ..... |
| bacel     | KEEEP.....    | ..... | ..... | ..... | ..... |
| basu      | KEEEPQEVd.    | ..... | ..... | ..... | ..... |
| bast      | KEEKQAA...    | ..... | ..... | ..... | ..... |
| baha      | KDEKEES...    | ..... | ..... | ..... | ..... |
| enfa      | PEETTLVST.    | ..... | ..... | ..... | ..... |
| ocih      | PNETDLVSE.    | ..... | ..... | ..... | ..... |
| stpy      | PEEVALKS..    | ..... | ..... | ..... | ..... |
| stpn      | PDEVELKL..    | ..... | ..... | ..... | ..... |
| stmu      | PTTVELKN..    | ..... | ..... | ..... | ..... |
| lala      | PEEVELNL..    | ..... | ..... | ..... | ..... |
| stau      | KEEIP.....    | ..... | ..... | ..... | ..... |
| oeoe      | KEKAREELQN    | ..... | ..... | ..... | ..... |
| thma      | .....         | ..... | ..... | ..... | ..... |
| thth      | .....         | ..... | ..... | ..... | ..... |
| dera      | TEQKPEAAAP A. | ..... | ..... | ..... | ..... |
| stco      | .....         | ..... | ..... | ..... | ..... |
| hepyj99   | KEKAPPT...    | ..... | ..... | ..... | ..... |
| hepy26695 | KEKAPLK...    | ..... | ..... | ..... | ..... |
| caje      | KEESP.K...    | ..... | ..... | ..... | ..... |
| aqae      | .....         | ..... | ..... | ..... | ..... |
| funu      | KIENP.....    | ..... | ..... | ..... | ..... |
| trer      | .....         | ..... | ..... | ..... | ..... |
| sy6803    | .....         | ..... | ..... | ..... | ..... |
| arth_1    | .....         | ..... | ..... | ..... | ..... |
| prma      | .....         | ..... | ..... | ..... | ..... |
| caelmt    | .....         | ..... | ..... | ..... | ..... |
| hosamt    | .....         | ..... | ..... | ..... | ..... |
| tarumt    | .....         | ..... | ..... | ..... | ..... |

|        |       |       |       |       |       |
|--------|-------|-------|-------|-------|-------|
| drment | ..... | ..... | ..... | ..... | ..... |
| anga2  | ..... | ..... | ..... | ..... | ..... |
| didimt | ..... | ..... | ..... | ..... | ..... |
| caabmt | ..... | ..... | ..... | ..... | ..... |
| sacemt | ..... | ..... | ..... | ..... | ..... |
| scpomt | ..... | ..... | ..... | ..... | ..... |
| lema   | ..... | ..... | ..... | ..... | ..... |
| myge   | ..... | ..... | ..... | ..... | ..... |
| mypn   | ..... | ..... | ..... | ..... | ..... |
| urur   | ..... | ..... | ..... | ..... | ..... |
| mypu   | ..... | ..... | ..... | ..... | ..... |

1101

1150

|       |            |            |            |           |            |
|-------|------------|------------|------------|-----------|------------|
| mask  | ~~~~~      | ~~~~~      | ~~~~~      | ~~~~~     | ~~~~~      |
| stpn2 | .....      | .....      | .....      | .....     | .....      |
| bace2 | .....      | .....      | .....      | .....     | .....      |
| baan2 | .....      | .....      | .....      | .....     | .....      |
| clpe2 | .....      | .....      | .....      | .....     | .....      |
| deet  | .....      | .....      | .....      | .....     | .....      |
| codi  | .....      | .....      | .....      | .....     | .....      |
| thnw  | .....      | .....      | .....      | .....     | .....      |
| thvo  | .....      | .....      | .....      | .....     | .....      |
| pogi  | .....      | .....      | .....      | .....     | .....      |
| bafr  | .....      | .....      | .....      | .....     | .....      |
| cyhu  | .....      | .....      | .....      | .....     | .....      |
| chte  | .....      | .....      | .....      | .....     | .....      |
| chmu  | .....      | .....      | .....      | .....     | .....      |
| chtr  | .....      | .....      | .....      | .....     | .....      |
| chpn  | .....      | .....      | .....      | .....     | .....      |
| fugu  | .....      | .....      | .....      | .....     | .....      |
| hosa  | .....      | .....      | .....      | .....     | .....      |
| anga  | GADRTVWQPE | VNILLELKKQ | L.....     | .....     | .....      |
| drme  | .....      | .....      | .....      | .....     | .....      |
| sace  | .....      | .....      | .....      | .....     | .....      |
| scpo  | .....      | .....      | .....      | .....     | .....      |
| didi  | .....      | .....      | .....      | .....     | .....      |
| arth  | .....      | .....      | .....      | .....     | .....      |
| orsa  | .....      | .....      | .....      | .....     | .....      |
| cael  | RLDGENKQLT | IDVKTLOHQL | IELETAAGIK | QVPKPVVSC | PTPTSTPASG |
| encu  | .....      | .....      | .....      | .....     | .....      |
| trde  | .....      | .....      | .....      | .....     | .....      |
| trpa  | .....      | .....      | .....      | .....     | .....      |
| bobu  | .....      | .....      | .....      | .....     | .....      |
| cacr  | .....      | .....      | .....      | .....     | .....      |
| suto  | .....      | .....      | .....      | .....     | .....      |
| suso  | .....      | .....      | .....      | .....     | .....      |
| aepe  | .....      | .....      | .....      | .....     | .....      |
| pyba  | .....      | .....      | .....      | .....     | .....      |
| pyho  | .....      | .....      | .....      | .....     | .....      |
| pyab  | .....      | .....      | .....      | .....     | .....      |
| pyfu  | .....      | .....      | .....      | .....     | .....      |
| meja  | .....      | .....      | .....      | .....     | .....      |

|           |       |       |       |       |       |
|-----------|-------|-------|-------|-------|-------|
| meth      | ..... | ..... | ..... | ..... | ..... |
| arfu      | ..... | ..... | ..... | ..... | ..... |
| hanrc     | ..... | ..... | ..... | ..... | ..... |
| psfl      | ..... | ..... | ..... | ..... | ..... |
| psae      | ..... | ..... | ..... | ..... | ..... |
| esco      | ..... | ..... | ..... | ..... | ..... |
| saty      | ..... | ..... | ..... | ..... | ..... |
| yepe      | ..... | ..... | ..... | ..... | ..... |
| vich      | ..... | ..... | ..... | ..... | ..... |
| haein     | ..... | ..... | ..... | ..... | ..... |
| acac      | ..... | ..... | ..... | ..... | ..... |
| pamu      | ..... | ..... | ..... | ..... | ..... |
| neme      | ..... | ..... | ..... | ..... | ..... |
| nogo      | ..... | ..... | ..... | ..... | ..... |
| xyfa      | ..... | ..... | ..... | ..... | ..... |
| buAPS     | ..... | ..... | ..... | ..... | ..... |
| sime      | ..... | ..... | ..... | ..... | ..... |
| agtu      | ..... | ..... | ..... | ..... | ..... |
| brsu      | ..... | ..... | ..... | ..... | ..... |
| melo      | ..... | ..... | ..... | ..... | ..... |
| rhpa      | ..... | ..... | ..... | ..... | ..... |
| mytu      | ..... | ..... | ..... | ..... | ..... |
| rhru      | ..... | ..... | ..... | ..... | ..... |
| noar      | ..... | ..... | ..... | ..... | ..... |
| rico      | ..... | ..... | ..... | ..... | ..... |
| ripr      | ..... | ..... | ..... | ..... | ..... |
| plyo      | ..... | ..... | ..... | ..... | ..... |
| plfa      | ..... | ..... | ..... | ..... | ..... |
| clpel     | ..... | ..... | ..... | ..... | ..... |
| clac      | ..... | ..... | ..... | ..... | ..... |
| liin      | ..... | ..... | ..... | ..... | ..... |
| limo      | ..... | ..... | ..... | ..... | ..... |
| baan1     | ..... | ..... | ..... | ..... | ..... |
| bacel     | ..... | ..... | ..... | ..... | ..... |
| basu      | ..... | ..... | ..... | ..... | ..... |
| bast      | ..... | ..... | ..... | ..... | ..... |
| baha      | ..... | ..... | ..... | ..... | ..... |
| enfa      | ..... | ..... | ..... | ..... | ..... |
| ocih      | ..... | ..... | ..... | ..... | ..... |
| stpy      | ..... | ..... | ..... | ..... | ..... |
| stpn      | ..... | ..... | ..... | ..... | ..... |
| stmu      | ..... | ..... | ..... | ..... | ..... |
| lala      | ..... | ..... | ..... | ..... | ..... |
| stau      | ..... | ..... | ..... | ..... | ..... |
| oeoe      | ..... | ..... | ..... | ..... | ..... |
| thma      | ..... | ..... | ..... | ..... | ..... |
| thth      | ..... | ..... | ..... | ..... | ..... |
| dera      | ..... | ..... | ..... | ..... | ..... |
| stco      | ..... | ..... | ..... | ..... | ..... |
| hepyj99   | ..... | ..... | ..... | ..... | ..... |
| hepy26695 | ..... | ..... | ..... | ..... | ..... |
| caje      | ..... | ..... | ..... | ..... | ..... |

```

    aqae .....
    funu .....
    trer .....
sy6803 .....
    arth_1 .....
    prma .....
    caelmt .....
    hosamt .....
    tarumt .....
    drmemt .....
    anga2 .....
    didimt .....
    caabmt .....
    sacemt .....
    scpomt .....
    lema .....
    myge .....
    mypn .....
    urur .....
    mypu .....

```

1151

1200

```

    mask ~~~~~
    stpn2 .....
    bace2 .....
    baan2 .....
    clpe2 .....
    deet .....W
    codi .....W
    thnw .....Y
    thvo .....F
    pogi .....AEDI AFEDFLKLDI
    bafr .....RANI EFDDFMKLDI
    cyhu .....KENV SFDDFAKMDI
    chte .....FKPEI TFDDFQKIDL
    chmu .....
    chtr .....
    chpn .....
    fugu .....
    hosa .....
    anga .....QTLSQPR TSESAATAAP GEKPAKQAPK QAPKPATGGA
    drme .....
    sace .....
    scpo .....
    didi .....
    arth .....TKLSDAK KQKASSKGGG KPKPQPAADR EITMARLDIR
    orsa .....TKLSDGG QKKEQKKQSG GSKSK.NAEV DVTVAKLDIR
    cael IITEAPKKEA PSTPAPSEPK KAKEQKKGKG GAAAA.PVDD TIDVGRLLDMR
    encu .....
    trde .....
    trpa .....MNKKETD AQQKKEEREM PPPSDTARLS AFFSERVVLK
    bobu .....D KNMKENEQAE NLPIAKEQPE NLFREKVLRLR

```

|       |       |       |       |             |            |
|-------|-------|-------|-------|-------------|------------|
| cacr  | ..... | ..... | ..... | .....       | .....      |
| suto  | ..... | ..... | ..... | .....       | .....      |
| suso  | ..... | ..... | ..... | .....       | .....      |
| aepe  | ..... | ..... | ..... | .....       | .....      |
| pyba  | ..... | ..... | ..... | .....       | .....      |
| pyho  | ..... | ..... | ..... | .....YV     | KFEDFAKLDL |
| pyab  | ..... | ..... | ..... | .....YV     | KFDDFAKLDL |
| pyfu  | ..... | ..... | ..... | .....YV     | SFEEFSKIDL |
| meja  | ..... | ..... | ..... | .....QI     | DISYLEKIDL |
| meth  | ..... | ..... | ..... | .....TV     | TIDDFTTMDI |
| arfu  | ..... | ..... | ..... | .....EEI    | SIEDFQKLDI |
| hanrc | ..... | ..... | ..... | .....DDI    | SFEEFQALDL |
| psfl  | ..... | ..... | ..... | ..KDPLSPEI  | DFDTFAAVDL |
| psae  | ..... | ..... | ..... | ..KEPIAAEI  | DFDAFAAVDL |
| esco  | ..... | ..... | ..... | ..DDPIQETI  | TFDDFAKVDL |
| saty  | ..... | ..... | ..... | .....       | .....      |
| yepe  | ..... | ..... | ..... | ..DDPIQETI  | SFDDFAKVDM |
| vich  | ..... | ..... | ..... | ..KDPLAAEI  | EFDDFAKVDL |
| haein | ..... | ..... | ..... | ..VEPIAETI  | TIDDFAKLDM |
| acac  | ..... | ..... | ..... | ..IEPIAETI  | TIDDFAKLDL |
| pamu  | ..... | ..... | ..... | ..VEPIAETI  | SIEDFAKLDL |
| neme  | ..... | ..... | ..... | ..YEKVAEQA  | SFDDFMKIDM |
| nogo  | ..... | ..... | ..... | ..YEKVAEQA  | GFDDFMKIDM |
| xyfa  | ..... | ..... | ..... | ..PETTAPTI  | GIDDFAKLDL |
| buAPS | ..... | ..... | ..... | .....       | .....      |
| sime  | ..... | ..... | ..... | .....       | .....      |
| agtu  | ..... | ..... | ..... | .....       | .....      |
| brsu  | ..... | ..... | ..... | .....       | .....      |
| melo  | ..... | ..... | ..... | .....       | .....      |
| rhpa  | ..... | ..... | ..... | .....       | .....      |
| mytu  | ..... | ..... | ..... | .....       | .....      |
| rhru  | ..... | ..... | ..... | .....       | .....      |
| noar  | ..... | ..... | ..... | .....       | .....      |
| rico  | ..... | ..... | ..... | .....       | .....      |
| ripr  | ..... | ..... | ..... | .....       | .....      |
| plyo  | ..... | ..... | ..... | .....HINTL  | TVAIMNIKPL |
| plfa  | ..... | ..... | ..... | .....KLVNLL | TLAILNIKPL |
| clpel | ..... | ..... | ..... | .....IKEEI  | TIDDFDKIDL |
| clac  | ..... | ..... | ..... | .....LKPEI  | SIDDVDKLDL |
| liin  | ..... | ..... | ..... | .....ETPQI  | GIEDFDKIDL |
| limo  | ..... | ..... | ..... | .....ETPQI  | GIEDFDKIDL |
| baan1 | ..... | ..... | ..... | .....KAEEI  | TIDDFFKVEL |
| bacel | ..... | ..... | ..... | .....KAEEI  | TIDDFFKVEL |
| basu  | ..... | ..... | ..... | .....RLPEI  | TIDQFMDVEL |
| bast  | ..... | ..... | ..... | .....RAEEI  | SIDDFAKVDL |
| baha  | ..... | ..... | ..... | .....DEI    | TIDDFSVEL  |
| enfa  | ..... | ..... | ..... | .....KEKQI  | KYDDFDKVEL |
| ocih  | ..... | ..... | ..... | .....KEKQI  | KYDVFDKVEL |
| stpy  | ..... | ..... | ..... | .....EKDVI  | TFETFDVEI  |
| stpn  | ..... | ..... | ..... | .....NKDEI  | KFEDFDKVEI |
| stmu  | ..... | ..... | ..... | .....EKKAI  | KFDDFDKLEI |
| lala  | ..... | ..... | ..... | .....TLPQI  | KFDDFEKIEL |

|           |       |       |       |       |             |            |
|-----------|-------|-------|-------|-------|-------------|------------|
| stau      | ..... | ..... | ..... | ..... | .....SKPQI  | DIKDFDKVEI |
| oeoe      | ..... | ..... | ..... | ..... | .....ETVEEI | NYDDFAKLRL |
| thma      | ..... | ..... | ..... | ..... | .....AI     | TIDDFSKVDL |
| thth      | ..... | ..... | ..... | ..... | .....KEEAWI | GIEDFAKVEL |
| dera      | ..... | ..... | ..... | ..... | .....QNDGLI | SIDDFAKIDL |
| stco      | ..... | ..... | ..... | ..... | .....       | .....      |
| hepyj99   | ..... | ..... | ..... | ..... | .....QENYI  | SIEDFKKVEI |
| hepy26695 | ..... | ..... | ..... | ..... | .....QENYI  | GIEDFKKVEI |
| caje      | ..... | ..... | ..... | ..... | .....I      | KIDDFAKIEI |
| aqae      | ..... | ..... | ..... | ..... | .....       | .....      |
| funu      | ..... | ..... | ..... | ..... | .....V      | DIKEFNKIEI |
| trer      | ..... | ..... | ..... | ..... | .....       | .....      |
| sy6803    | ..... | ..... | ..... | ..... | .....       | .....      |
| arth_1    | ..... | ..... | ..... | ..... | .....       | ..KKTGKAKV |
| prma      | ..... | ..... | ..... | ..... | .....       | .....      |
| caelmt    | ..... | ..... | ..... | ..... | .....       | .....      |
| hosamt    | ..... | ..... | ..... | ..... | .....       | .....      |
| tarumt    | ..... | ..... | ..... | ..... | .....       | .....      |
| drmemt    | ..... | ..... | ..... | ..... | .....       | .....      |
| anga2     | ..... | ..... | ..... | ..... | .....       | .....      |
| didimt    | ..... | ..... | ..... | ..... | .....       | .....      |
| caabmt    | ..... | ..... | ..... | ..... | .....       | .....      |
| sacemt    | ..... | ..... | ..... | ..... | .....       | .....      |
| scpomt    | ..... | ..... | ..... | ..... | .....       | .....      |
| lema      | ..... | ..... | ..... | ..... | .....       | .....      |
| myge      | ..... | ..... | ..... | ..... | .....       | .....      |
| mypn      | ..... | ..... | ..... | ..... | .....       | .....      |
| urur      | ..... | ..... | ..... | ..... | .....       | .....      |
| mypu      | ..... | ..... | ..... | ..... | .....       | .....      |

1201

1250

|       |            |             |             |            |            |       |
|-------|------------|-------------|-------------|------------|------------|-------|
| mask  | ~~~~~      | ~~~~~       | ~~~~~       | ~~~~~      | ~~~~~      | ~~~~~ |
| stpn2 | .....      | .....       | .....       | .....      | .....      | ..... |
| bace2 | .....      | .....       | .....       | .....      | .....      | ..... |
| baan2 | .....      | .....       | .....       | .....      | .....      | ..... |
| clpe2 | .....      | .....       | .....       | .....      | .....      | ..... |
| deet  | VLKMPVAGQ. | EMIPPEPLFK  | KLEDSVVE.E  | ETARM..... | .....      | ..... |
| codi  | ARIDVQPGT. | ALSKPKPLIA  | KLDPELGE.T  | GPEWAPVNP. | .....      | ..... |
| thnw  | RHLYEMHAF. | SVHRGAIPIFE | KIDLESLV.S  | KLN.....   | .....      | ..... |
| thvo  | SILNSINDF. | SVKPSRIPFE  | KLDIDKLLK.L | .....      | .....      | ..... |
| pogi  | RVGTVLECE. | KVPKADKLLR  | FRIDDGLS.G  | RTIVSGIAKH | YA.PEELVGK | ..... |
| bافر  | RVGTVLECQ. | KVPKADKLLQ  | FKIDDGLE.T  | RTIVSGIAQH | YK.PEELVGK | ..... |
| cyhu  | RVATIIAAE. | KVAKTKKLLK  | LTLLKTGID.E | RTVVSGIAEH | FE.PEAIIGQ | ..... |
| chte  | RVAKVVACE. | PVKKANKLLK  | LQLQVGSE.Q  | RQVLSGIAQY | FT.PEQMVGK | ..... |
| chmu  | .....SF.   | SLKEPELLFT  | VVE.....    | .....      | .....      | ..... |
| chtr  | .....KF.   | SLKEPELLFT  | MVE.....    | .....      | .....      | ..... |
| chpn  | .....EF.   | HLKSPRLLFT  | TVE.....    | .....      | .....      | ..... |
| fugu  | .....      | AAVADPERAK  | QLSQAVVE.Q  | GEKVRNLKAQ | KA.EKALITA | ..... |
| hosa  | .....      | VTTAKPQQIQ  | ALMDEVTK.Q  | GNIVRELKAQ | KA.DKNEVAA | ..... |
| anga  | AVSTPPATN. | TTAADPSDVK  | ALEEEIAQ.Q  | GNKVRKLKEA | NS.DKSVWQP | ..... |
| drme  | .....      | .....       | .....       | .....      | .....      | ..... |
| sace  | .....      | .....       | .....       | .....      | .....      | ..... |

|       |            |            |            |            |            |
|-------|------------|------------|------------|------------|------------|
| scpo  | .....      | .....      | .....      | .....      | .....      |
| didi  | .....      | .....      | .....      | .....      | .....      |
| arth  | VGKIVKAEK. | HPKADALYVE | EIDVGGGE.I | RTVVSGLVKY | IP.LEEQNR  |
| orsa  | VGLIRKAQK. | HPDADSLYVE | EIDVGEEA.P | RTVVSGLVKF | IP.LEEQNR  |
| cael  | VGRIIKCEK. | HPDADALYVE | QIDVGESA.P | RTVVSGLVRH | VP.LDQMQR  |
| encu  | .....      | .....      | .....      | .....      | .....      |
| trde  | .....      | .....      | .....      | .....      | .....      |
| trpa  | VARVLQVER. | HPNADMLFVE | TLDDGSGV.E | RVIVSGLVPY | MA.ADALRGA |
| bobu  | VVKINKIER. | NPEAKNLFIL | KLDDGTNK.D | KQIVSGLEGY | YT.EEELLGK |
| cacr  | .....      | .....      | .....      | .....      | .....      |
| suto  | .....      | .....      | .....      | .....      | .....      |
| suso  | .....      | .....      | .....      | .....      | .....      |
| aepe  | .....      | .....      | .....      | .....      | .....      |
| pyba  | .....      | .....      | .....      | .....      | .....      |
| pyho  | RVGKIIEVK. | DHPNADKLYI | VKVDLGKE.V | RTLVAQLKKY | YK.PEELLNK |
| pyab  | RVGKIIEVK. | DHPNADKLYV | VKVDLGDE.V | RTLVAQLKKY | YK.PEELNLR |
| pyfu  | RIGKIVEVQ. | DHPNADKLYV | VKVDLGGE.I | RTLVAQLKKY | YK.PEELNLR |
| meja  | RVGEVVEAE. | DIPKSKKLLK | LMVDLGDE.K | RQIVSGIKGY | YK.PEDLVGK |
| meth  | RVGVIRSAE. | RIEGSDKLLK | LIIDVGER.E | MQVVAGLAEK | YS.PEDLVER |
| arfu  | RIGRVLKAE. | KVKKSKKLIK | LIIDIGDE.Q | RQIVSGIAED | YT.PEELEGK |
| hanrc | RVGEVVEAE. | GIEGADDLAR | LEVDIGHE.V | RQIVAGIKQL | HD.LDALPGT |
| psfl  | RVALIVKAE. | HVEGADKLLR | LTLDIGDE.Q | RNVFSGIKSA | YDPSKLDGR  |
| psae  | RIALIEKCE. | FVEGADKLLR | LSLDIGDA.K | RNVFSGIKSA | YDPSALEGR  |
| esco  | RVALIENAE. | FVEGSDKLLR | LTLDLGGE.K | RNVFSGIRSA | YDPPQALIGR |
| saty  | .....      | .....      | .....      | .....      | .....      |
| yepe  | RIALIQQAE. | FVEGSDKLLK | LTLELGGE.T | RQVFSGIRSA | YDPPKALEGR |
| vich  | RIAKILSCE. | AVEKSDKLLK | FELDIGGE.T | RQVFSGIKSA | YQ.PEDLIGK |
| haein | RVAKVLKCE. | AVPESNKLLR | FELDLGDH.T | RQVFSGIKAA | YKPEELEGR  |
| acac  | RVAKVLKCE. | AVPESNKLLR | FELDLGDH.K | RQVFSGIKAA | YDKPEELEGR |
| pamu  | RVAKVMKCE. | AVPESNKLLR | FELDLGDH.T | RQVFSGIKEA | YNNPAELEGR |
| neme  | RVAKVLNCE. | AVEGSTKLLK | FDLDFGFE.K | RIIFSGIAAS | YNNPAELNGR |
| nogo  | RVAKVLNCE. | AVEGSTKLLK | FDLDFGFE.K | RIIFSGIAAS | YNNPAELNGR |
| xyfa  | RIGKVLVCE. | YVEGSDKLLR | FELDAGPLGK | RQIFSGIRAS | YSNPETLIGR |
| buAPS | .....      | .....      | .....      | .....      | .....      |
| sime  | .....      | .....      | .....      | .....      | .....      |
| agtu  | .....      | .....      | .....      | .....      | .....      |
| brsu  | .....      | .....      | .....      | .....      | .....      |
| melo  | .....      | .....      | .....      | .....      | .....      |
| rhpa  | .....      | .....      | .....      | .....      | .....      |
| mytu  | .....      | .....      | .....      | .....      | .....      |
| rhru  | .....      | .....      | .....      | .....      | .....      |
| noar  | .....      | .....      | .....      | .....      | .....      |
| rico  | .....      | .....      | .....      | .....      | .....      |
| ripr  | .....      | .....      | .....      | .....      | .....      |
| plyo  | TINNITVTAI | IPVHKEIFK  | FHPDENIPVG | TLVHAQNYKT | LVKQRDNLTK |
| plfa  | TINNITVNAI | IPVHRKEIFT | FPIEERIPTG | TLIQGNKYKT | LVKQRDNLTK |
| clpel | RVVKVLECEP | VKKA.KKLLK | LKVDLG.GEE | RQVISGIAQY | YK.PEELVVK |
| clac  | RVVKVLECEP | VKKS.KKLLK | LKVELG.GEE | RQVLSGISQF | YK.PEDLIGK |
| liin  | RVAEVKQVVK | VKKA.DKLLC | FQLDLGEGKL | RQVLSGIAEF | YQ.PEELIGK |
| limo  | RVAEVKQVVK | VKKA.DKLLC | FQLDLGEGKL | RQVLSGIAEF | YQ.PEELIGK |
| baan1 | RVAEVLSAEP | VKKA.DKLLK | IQLDLG.TEK | RQVVSGIAKF | YS.PEDLKGK |
| bacel | RVAEVLSAEP | VKKA.DKLLK | IQLDLG.TEK | RQVVSGIAKF | YS.PEDLKGK |



|           |            |            |            |            |             |
|-----------|------------|------------|------------|------------|-------------|
| basu      | RVAEVIEAEP | VKKA.DRLLK | LQLDLG.FEK | RQVVSGIAKH | YT.PEELVGK  |
| bast      | RVAEVVQPER | MKNA.DKLLK | LQLDLG.GEK | RQVISGIAEF | YK.PEELIGK  |
| baha      | RIAEVIDAEP | VKKA.DRLLK | IQLDLG.YEK | RQVVSGIAKY | YS.PSDLIGK  |
| enfa      | KVAEVIDCKK | VKGA.DKLLQ | FRLDAGDENH | RQILSGIAEF | YDPAAALIGK  |
| ocih      | KVAEVKDCSK | VEGA.DKLLK | FRLDAGDNGD | RQILSGIAEY | YSEPEQLIGK  |
| stpy      | RVAEVKEVSK | VEGS.EKLLR | FRVDAGDGQD | RQILSGIAKF | YPNEQELVGK  |
| stpn      | RVAEVKEVSK | VEGS.DKLLQ | FRLDAGDGED | RQILSGIAKY | YPNEQELVGK  |
| stmu      | RVAEVKEVSK | VKGS.DKLLK | FRLDAGDGED | RQILSGIAKY | YPNELDLVGK  |
| lala      | KVAEVLEVEP | VEGS.DKLLR | FKLDAGDSEP | RQILSGIAQF | YPNEQELVGK  |
| stau      | KAATIIDAEP | VKKS.DKLLK | IQVDLD.SEQ | RQIVSGIAKF | YT.PDDIIGK  |
| oeoe      | IAGKIKSGEI | LKNS.KKLIK | WQIDDGSEDG | RQILSGIREW | YDPDPSVLVGK |
| thma      | RIAKVLEAEK | VPNS.RKLLR | LIIDLK.TEK | RQIVAGIAEH | YR.PEELVGK  |
| thth      | RVAEVLAEEK | HPNA.DRLLV | LRLSLG.NEE | RTVVSGIAKW | YR.PEELVGK  |
| dera      | RIAEVVACEA | VEKA.DKLLK | LTVKLG.DET | RTVVSGIRKW | YE.PEALVGR  |
| stco      | .....E.    | .....      | .....      | .....      | .....       |
| hepyj99   | KVGLIKEAQR | IEKS.NKLLR | LKVLDGENRL | RQIISGIALD | Y.EPESLVGQ  |
| hepy26695 | KVGLIKEAQR | IEKS.NKLLR | LKVLDGEGRL | RQIISGIALD | Y.EPESLVGQ  |
| caje      | KVAKVLDCQN | IEGS.EKLLK | FQLELDDKEI | RQVLSGIAKY | Y.KASDLIGK  |
| aqae      | .....      | .....      | .....      | .....      | .....       |
| funu      | KVVEILDVVK | VEGA.DKLLK | FKVFDGEFER | .QIISGLAKF | YPDFFKKLISE |
| trer      | .....      | .....      | .....      | .....      | .....       |
| sy6803    | .....      | .....      | .....      | .....      | .....       |
| arth_1    | KVVEQTPTVA | EA.....    | .....      | .....      | .....       |
| prma      | .....      | .....      | .....      | .....      | .....       |
| caelmt    | .....      | .....      | .....      | .....      | .....       |
| hosamt    | .....      | .....      | .....      | .....      | .....       |
| tarunt    | .....      | .....      | .....      | .....      | .....       |
| drmemt    | .....      | .....      | .....      | .....      | .....       |
| anga2     | .....      | .....      | .....      | .....      | .....       |
| didimt    | .....      | .....      | .....      | .....      | .....       |
| caabmt    | .....      | .....      | .....      | .....      | .....       |
| sacemt    | .....      | .....      | .....      | .....      | .....       |
| scpomt    | .....      | .....      | .....      | .....      | .....       |
| lema      | .....      | .....      | .....      | .....      | .....       |
| myge      | .....      | .....      | .....      | .....      | .....       |
| mypn      | .....      | .....      | .....      | .....      | .....       |
| urur      | .....      | .....      | .....      | .....      | .....       |
| mypu      | .....      | .....      | .....      | .....      | .....       |

1251

1300

|       |            |            |            |            |            |
|-------|------------|------------|------------|------------|------------|
| mask  | ~~~~~      | ~~~~~      | ~~~~~      | ~~~~~      | ~~~~~      |
| stpn2 | .....      | .....      | .....      | .....      | .....      |
| bace2 | .....      | .....      | .....      | .....      | .....      |
| baan2 | .....      | .....      | .....      | .....      | .....      |
| clpe2 | .....      | .....      | .....      | .....      | .....      |
| deet  | .....      | .....      | .....      | .....      | .....      |
| codi  | .....      | .....      | .....      | .....      | .....      |
| thnw  | .....      | .....      | .....      | .....      | .....      |
| thvo  | .....      | .....      | .....      | .....      | .....      |
| pogi  | QVCFIANLPP | RKLK.GIESE | GMILSAEDAD | GSLRVIMPAA | EVAAGSQVK. |
| bافر  | QVCFIANLAP | RKLK.GIVSE | GMILSAENND | GSLAVVMPGR | EVKPGSEV.. |
| cyhu  | QVSLLANLAP | REIK.GIVSQ | GMILMAEDAD | GSLKFVQPAA | VVNAGSMIG. |

|       |            |            |            |            |             |
|-------|------------|------------|------------|------------|-------------|
| chte  | NVVLVANLAD | RTMR.GELSQ | GMILTVEGAD | GRLFLLEPQG | EGINGNSVS.  |
| chmu  | .....      | .....      | .....      | .....      | .....       |
| chtr  | .....      | .....      | .....      | .....      | .....       |
| chpn  | .....      | .....      | .....      | .....      | .....       |
| fugu  | EVTLLLDLKK | QLVL.AEGKT | PEPAPQKGKK | K.....     | .....       |
| hosa  | EVAKLLDLKK | QLAV.AEGKP | PE.APKGKKK | K.....     | .....       |
| anga  | EVSLLLSLKQ | KLAS.LTGVP | VAAPAGGGKK | KG..NKK... | .....       |
| drme  | .....      | .....      | .....      | .....      | .....       |
| sace  | .....      | .....      | .....      | .....      | .....       |
| scpo  | .....      | .....      | .....      | .....      | .....       |
| didi  | .....      | .....      | .....      | .....      | .....       |
| arth  | MVCVLCNLKP | AKMR.DIVSQ | AMVLAASSSD | GS..KVELVE | PPKTANIGER  |
| orsa  | KVCVLCNLKP | VAMR.GIKSH | AMVLAASNE  | HT..KVELVE | PPESA AVGER |
| cael  | LVVVLCNLKP | AKMR.GVESR | AMVMCASSPD | ...KVEIME  | VPADSKPGTP  |
| encu  | .....      | .....      | .....      | .....      | .....       |
| trde  | .....      | .....      | .....      | .....      | .....       |
| trpa  | HVLIVDNLQP | RSLR.GVRSC | GMLLAAEYVD | AQGTKAIELV | QAPWALPGER  |
| bobu  | HIIIVDNLKP | AKFR.GIKSE | GMLIAAEDKN | KNFKVIIVED | SIQNPIAGER  |
| cacr  | .....      | .....      | .....      | .....      | .....       |
| suto  | .....      | .....      | .....      | .....      | .....       |
| suso  | .....      | .....      | .....      | .....      | .....       |
| aepe  | .....      | .....      | .....      | .....      | .....       |
| pyba  | .....      | .....      | .....      | .....      | .....       |
| pyho  | YVIIVANLEP | KKLR.GVESQ | GMLLAADDGE | .NVALLMPDK | EVKLGAKVR.  |
| pyab  | YVVVVANLEP | KKLR.GIGSQ | GMLLAADDGE | .RVALLMPDK | EVKLGAKVR.  |
| pyfu  | YVVIVANLEP | KKLR.GVESQ | GMLLAADDGE | .KVALLMPDK | EVKLGAKVR.  |
| meja  | KVIVICNLKP | AKLC.GVLSE | GMILAAEDDE | GNVSLLTVDK | DIKAGSKVR.  |
| meth  | KITVLVNLKP | AKLF.GVKSE | GMVLATGES. | ..LNILDPG. | DAEVGERIR.  |
| arfu  | LVVVLANLKP | AKFM.GVESR | GMILAAEKDG | .KAVLLTPEK | EVEPGTRVC.  |
| hanrc | RVVVVANMEP | SELF.GVESN | GMVLAAGED. | ..ADLLTTHE | DSEPGTKVM.  |
| psfl  | LTMMIANLKP | RKMK.FGISE | GMVMAAGPGG | EIYLLSPDS  | GAKPGQRIK.  |
| psae  | LTLYVANLAP | RKMK.FGVSE | GMVLAAGPGG | EIYLLSPDS  | GAKPGQRVK.  |
| esco  | HTIMVANLAP | RKMR.FGISE | GMVMAAGPGG | KDIFLLSPDA | GAKPGHQVK.  |
| saty  | .....      | .....      | .....      | .....      | .....       |
| yepe  | MTVMVANLAP | RKMR.FGVSE | GMVMAAGPGX | SDIFLLSPDS | GAQPGMQVK.  |
| vich  | YTVVVANLKP | RKMK.FGMSE | GMILAAGPGG | SDLWLEPHQ  | GAQAGMRVM.  |
| haein | FVIMVANLAP | RKMK.FGVSE | GMILSAGTGG | SDLFLLSADS | GVTAGMQVK.  |
| acac  | FVIMVANLAP | RKMK.FGVSE | GMILSAGTGG | ADLFLLSADE | GVTAGMQVK.  |
| pamu  | FVVVIANLAP | RKMR.FGVSE | GMILSAGTGG | ADLFLLNADQ | GVKPGMQVK.  |
| neme  | MVIAVANFAP | RKMAKFGVSE | GMILSAATAD | GKLKLLDVDA | GAQPGDKVG.  |
| nogo  | MVIAVANFAP | RKMAKFGVSE | GMILSAATAD | GKLKLLDVDA | GAQPGDKV..  |
| xyfa  | NVVFIANLAP | RKMR.FGISQ | GMILSAGFDS | GTLALLDADS | SAQPGMPVR.  |
| buAPS | .....      | .....      | .....      | .....      | .....       |
| sime  | .....      | .....      | .....      | .....      | .....       |
| agtu  | .....      | .....      | .....      | .....      | .....       |
| brsu  | .....      | .....      | .....      | .....      | .....       |
| melo  | .....      | .....      | .....      | .....      | .....       |
| rhpa  | .....      | .....      | .....      | .....      | .....       |
| mytu  | .....      | .....      | .....      | .....      | .....       |
| rhru  | .....      | .....      | .....      | .....      | .....       |
| noar  | .....      | .....      | .....      | .....      | .....       |
| rico  | .....      | .....      | .....      | .....      | .....       |

|           |            |            |            |            |            |
|-----------|------------|------------|------------|------------|------------|
| ripr      | .....      | .....      | .....      | .....      | .....      |
| plyo      | KEINSLQLSI | INKNC.FYEK | NIPLVFASS. | DNPFYHATQT | SGVLNFF... |
| plfa      | KEVVSLLDSI | INNKC.FFEK | NIPLVFASHE | DKQVYHSTQD | NGSLTFF... |
| clpel     | YVVLVANLKP | VKLRG.ELSQ | GMILAAAPSD | DSELLLVN.P | GEMLTGSQVR |
| clac      | KVVLVANLKP | AKLMG.QLSQ | GMILAVATDD | DSKLYTLDIP | EDIPTGSIVR |
| liin      | KVIVVSNLKP | VKLRG.LMSE | GMILSGEK.. | DGKLSVIEAN | SALPNGAKVK |
| limo      | KVIVVSNLKP | VKLRG.LMSE | GMILSGEK.. | DGKLSVIEAS | SALPNGAKVK |
| baan1     | KVICVTNLKP | VKLRG.ELSQ | GMILAGEE.. | NGVLSLASID | QNIPNGTKIK |
| bacel     | KVICVTNLKP | VKLRG.ELSQ | GMILAGEE.. | NGVLSLASID | QNLPNGTKI. |
| basu      | KLVCVTNLKP | VKLRG.ELSQ | GMILAGEA.. | DGVLKVVSID | QSLPKGTRIK |
| bast      | KVICVANLKP | AKLRG.EWSE | GMILAGGS.. | GGGFSLATVD | QHVPNGTKIK |
| baha      | KVICVTNLKP | VKLRG.ELSQ | GMILAGSE.. | GDQLRLATVD | GALPNGSLVK |
| enfa      | KVVIVANLKP | RKMRG.QISQ | GMILSAESP. | EGKLQIVEAP | KEMPNGAGIA |
| ocih      | KVVIVANLKP | RKMRG.EISQ | GMILSAEYD. | .GKLQIVEAP | SEAPNGSSIS |
| stpy      | KLQIVANLKP | RKMMKKYISQ | GMILSAEHG. | D.QLTVLTVD | SSVPNGSII. |
| stpn      | KVQIVANLKP | RKMMKKYVSQ | GMILSAEHD. | G.KLTLLTVD | PAVPNGSVIG |
| stmu      | KLQIVANLKP | RKMMG.LVSQ | GMILSAEHA. | DGKLTVLTVD | SSVPNGSQIG |
| lala      | KLQIVANLKP | RKMMKKYVSQ | GMILSAEFD. | G.KLSVLTVD | DDVPAGSLIG |
| stau      | KVAVVTNLKP | AKLMG.QKSE | GMILSAEK.. | DGVLTLVSLP | SAIPNGAVIK |
| oeoe      | KIAIVANLKA | RKMAG.EISQ | GMILCAENS. | DGKVIVSELP | DEVEAGAAIN |
| thma      | LIVVVANLKP | AKLMG.IESQ | GMLLAAKS.. | GDTLRLTVD  | GEITPGAKVS |
| thth      | KVVLVANLKP | AKLRG.IESQ | GMILAAQEG. | E.ALALVTVE | GEVPPGRW.. |
| dera      | KVVLVANLKP | AKLRG.IESQ | GMILAAEDD. | AGNLDLVGTE | LDLPSGTKVR |
| stco      | .....KP    | AA.....    | .....      | .....      | .....      |
| hepyj99   | MVCVVANLKP | AKLMG.EMSE | GMILAVRD.. | NDNLALISPT | REKIAGSLIS |
| hepy26695 | MVCVVANLKP | AKLMG.EMSE | GMILAVRD.. | SDNLALISPT | REKIAGSLIS |
| caje      | QVCVISNLKK | AKIFG.HESD | GMILSAKS.. | GDKLVLIAPE | QLVQNGSLVG |
| aqae      | .....      | .....      | .....      | .....      | .....      |
| funu      | KVLAVVNLKF | TKLKG.EISQ | GMLLTTED.. | KNGVSLIKID | KTVEAGAIVS |
| trer      | .....      | .....      | .....      | .....      | .....      |
| sy6803    | .....      | .....      | .....      | .....      | .....      |
| arth_1    | .....      | .....      | .....      | .....      | .....      |
| prma      | .....      | .....      | .....      | .....      | .....      |
| caelmt    | .....      | .....      | .....      | .....      | .....      |
| hosamt    | .....      | .....      | .....      | .....      | .....      |
| tarumt    | .....      | .....      | .....      | .....      | .....      |
| drmemt    | .....      | .....      | .....      | .....      | .....      |
| anga2     | .....      | .....      | .....      | .....      | .....      |
| didimt    | .....      | .....      | .....      | .....      | .....      |
| caabmt    | .....      | .....      | .....      | .....      | .....      |
| sacemt    | .....      | .....      | .....      | .....      | .....      |
| scpomt    | .....      | .....      | .....      | .....      | .....      |
| lema      | .....      | .....      | .....      | .....      | .....      |
| myge      | .....      | .....      | .....      | .....      | .....      |
| mypn      | .....      | .....      | .....      | .....      | .....      |
| urur      | .....      | .....      | .....      | .....      | .....      |
| mypu      | .....      | .....      | .....      | .....      | .....      |
|           | 1301       |            |            |            | 1350       |
| mask      | ~~~~~      | ~~~~~      | ~~~~~      | ~~~~~      | ~~~~~      |
| stpn2     | .....      | .....      | .....      | .....      | .....      |
| bace2     | .....      | .....      | .....      | .....      | .....      |

|       |            |            |            |            |             |
|-------|------------|------------|------------|------------|-------------|
| baan2 | .....      | .....      | .....      | .....      | .....       |
| clpe2 | .....      | .....      | .....      | .....      | .....       |
| deet  | .....      | .....      | .....      | .....      | .....       |
| codi  | .....      | .....      | .....      | .....      | .....       |
| thnw  | .....      | .....      | .....      | .....      | .....       |
| thvo  | .....      | .....      | .....      | .....      | .....       |
| pogi  | .....      | .....      | .....      | .....      | .....       |
| bafr  | .....      | .....      | .....      | .....      | .....       |
| cyhu  | .....      | .....      | .....      | .....      | .....       |
| chte  | .....      | .....      | .....      | .....      | .....       |
| chmu  | .....      | .....      | .....      | .....      | .....       |
| chtr  | .....      | .....      | .....      | .....      | .....       |
| chpn  | .....      | .....      | .....      | .....      | .....       |
| fugu  | .....      | .....      | .....      | .....      | .....       |
| hosa  | .....      | .....      | .....      | .....      | .....       |
| anga  | .....      | .....      | .....      | .....      | .....       |
| drme  | .....      | .....      | .....      | .....      | .....       |
| sace  | .....      | .....      | .....      | .....      | .....       |
| scpo  | .....      | .....      | .....      | .....      | .....       |
| didi  | .....      | .....      | .....      | .....      | .....       |
| arth  | VTFPGFEGEP | DDVLNPKKKV | WETLLVDLNT | KENLVACYKD | VPFTT.SAGV  |
| orsa  | VTFAGYSGEP | EASLNAKSKT | WEKLSADLHS | NGELVACYKD | VPFTT.SAGV  |
| cael  | VVCPYTHRP  | DEQLNPKKKI | WETVAEDLKV | SAEGFAEWKG | QPLLLIGSESK |
| encu  | .....      | .....      | .....      | .....      | .....       |
| trde  | .....      | .....      | .....      | .....      | .....       |
| trpa  | ATLASAPPVI | TPHGSAVIDA | DAFFSVPIRV | VNYAVEVAGE | PLMVGG..RP  |
| bobu  | IILENDQ.NK | DLACPPKIDI | NKFLKANIVA | ENGELKINGI | NLILENSKNK  |
| cacr  | .....      | .....      | .....      | .....      | .....       |
| suto  | .....      | .....      | .....      | .....      | .....       |
| suso  | .....      | .....      | .....      | .....      | .....       |
| aepe  | .....      | .....      | .....      | .....      | .....       |
| pyba  | .....      | .....      | .....      | .....      | .....       |
| pyho  | .....      | .....      | .....      | .....      | .....       |
| pyab  | .....      | .....      | .....      | .....      | .....       |
| pyfu  | .....      | .....      | .....      | .....      | .....       |
| meja  | .....      | .....      | .....      | .....      | .....       |
| meth  | .....      | .....      | .....      | .....      | .....       |
| arfu  | .....      | .....      | .....      | .....      | .....       |
| hanrc | .....      | .....      | .....      | .....      | .....       |
| psfl  | .....      | .....      | .....      | .....      | .....       |
| psae  | .....      | .....      | .....      | .....      | .....       |
| esco  | .....      | .....      | .....      | .....      | .....       |
| saty  | .....      | .....      | .....      | .....      | .....       |
| yepe  | .....      | .....      | .....      | .....      | .....       |
| vich  | .....      | .....      | .....      | .....      | .....       |
| haein | .....      | .....      | .....      | .....      | .....       |
| acac  | .....      | .....      | .....      | .....      | .....       |
| pamu  | .....      | .....      | .....      | .....      | .....       |
| neme  | .....      | .....      | .....      | .....      | .....       |
| nogo  | .....      | .....      | .....      | .....      | .....       |
| xyfa  | .....      | .....      | .....      | .....      | .....       |
| buAPS | .....      | .....      | .....      | .....      | .....       |

|           |       |       |       |       |       |
|-----------|-------|-------|-------|-------|-------|
| sime      | ..... | ..... | ..... | ..... | ..... |
| agtu      | ..... | ..... | ..... | ..... | ..... |
| brsu      | ..... | ..... | ..... | ..... | ..... |
| melo      | ..... | ..... | ..... | ..... | ..... |
| rhpa      | ..... | ..... | ..... | ..... | ..... |
| mytu      | ..... | ..... | ..... | ..... | ..... |
| rhru      | ..... | ..... | ..... | ..... | ..... |
| noar      | ..... | ..... | ..... | ..... | ..... |
| rico      | ..... | ..... | ..... | ..... | ..... |
| ripr      | ..... | ..... | ..... | ..... | ..... |
| plyo      | ..... | ..... | ..... | ..... | ..... |
| plfa      | ..... | ..... | ..... | ..... | ..... |
| clpel     | ..... | ..... | ..... | ..... | ..... |
| clac      | ..... | ..... | ..... | ..... | ..... |
| liin      | ..... | ..... | ..... | ..... | ..... |
| limo      | ..... | ..... | ..... | ..... | ..... |
| baan1     | ..... | ..... | ..... | ..... | ..... |
| bacel     | ..... | ..... | ..... | ..... | ..... |
| basu      | ..... | ..... | ..... | ..... | ..... |
| bast      | ..... | ..... | ..... | ..... | ..... |
| baha      | ..... | ..... | ..... | ..... | ..... |
| enfa      | ..... | ..... | ..... | ..... | ..... |
| ocih      | ~~~~~ | ~~~~~ | ~~~~~ | ~~~~~ | ~~~~~ |
| stpy      | ..... | ..... | ..... | ..... | ..... |
| stpn      | ..... | ..... | ..... | ..... | ..... |
| stmu      | ..... | ..... | ..... | ..... | ..... |
| lala      | ..... | ..... | ..... | ..... | ..... |
| stau      | ..... | ..... | ..... | ..... | ..... |
| oeoe      | ..... | ..... | ..... | ..... | ..... |
| thma      | ..... | ..... | ..... | ..... | ..... |
| thth      | ..... | ..... | ..... | ..... | ..... |
| dera      | ..... | ..... | ..... | ..... | ..... |
| stco      | ..... | ..... | ..... | ..... | ..... |
| hepyj99   | ..... | ..... | ..... | ..... | ..... |
| hepy26695 | ..... | ..... | ..... | ..... | ..... |
| caje      | ..... | ..... | ..... | ..... | ..... |
| aqae      | ..... | ..... | ..... | ..... | ..... |
| funu      | ..... | ..... | ..... | ..... | ..... |
| trer      | ..... | ..... | ..... | ..... | ..... |
| sy6803    | ..... | ..... | ..... | ..... | ..... |
| arth_1    | ..... | ..... | ..... | ..... | ..... |
| prma      | ..... | ..... | ..... | ..... | ..... |
| caelmt    | ..... | ..... | ..... | ..... | ..... |
| hosamt    | ..... | ..... | ..... | ..... | ..... |
| tarumt    | ..... | ..... | ..... | ..... | ..... |
| drmemt    | ..... | ..... | ..... | ..... | ..... |
| anga2     | ..... | ..... | ..... | ..... | ..... |
| didimt    | ..... | ..... | ..... | ..... | ..... |
| caabmt    | ..... | ..... | ..... | ..... | ..... |
| sacemt    | ..... | ..... | ..... | ..... | ..... |
| scpomt    | ..... | ..... | ..... | ..... | ..... |
| lema      | ..... | ..... | ..... | ..... | ..... |

|      |       |       |       |       |       |
|------|-------|-------|-------|-------|-------|
| myge | ..... | ..... | ..... | ..... | ..... |
| mypn | ..... | ..... | ..... | ..... | ..... |
| urur | ..... | ..... | ..... | ..... | ..... |
| mypu | ..... | ..... | ..... | ..... | ..... |

1351      1362

|       |            |    |
|-------|------------|----|
| mask  | ~~~~~      | ~~ |
| stpn2 | .....      | .. |
| bace2 | .....      | .. |
| baan2 | .....      | .. |
| clpe2 | .....      | .. |
| deet  | .....      | .. |
| codi  | .....      | .. |
| thnw  | .....      | .. |
| thvo  | .....      | .. |
| pogi  | .....      | .. |
| bafr  | .....      | .. |
| cyhu  | .....      | .. |
| chte  | .....      | .. |
| chmu  | .....      | .. |
| chtr  | .....      | .. |
| chpn  | .....      | .. |
| fugu  | .....      | .. |
| hosa  | .....      | .. |
| anga  | .....      | .. |
| drme  | .....      | .. |
| sace  | .....      | .. |
| scpo  | .....      | .. |
| didi  | .....      | .. |
| arth  | CKVSSISNGT | IR |
| orsa  | CKVKSIASGE | IR |
| cael  | MTAPTLRGVH | VK |
| encu  | .....      | .. |
| trde  | .....      | .. |
| trpa  | LVMQRVKEGT | VG |
| bobu  | ILSKDIPNGT | VC |
| cacr  | .....      | .. |
| suto  | .....      | .. |
| suso  | .....      | .. |
| aepe  | .....      | .. |
| pyba  | .....      | .. |
| pyho  | .....      | .. |
| pyab  | .....      | .. |
| pyfu  | .....      | .. |
| meja  | .....      | .. |
| meth  | .....      | .. |
| arfu  | .....      | .. |
| hanrc | .....      | .. |
| psfl  | .....      | .. |
| psae  | .....      | .. |
| esco  | .....      | .. |
| saty  | .....      | .. |

yepe ..... ..  
vich ..... ..  
haein ..... ..  
acac ..... ..  
pamu ..... ..  
neme ..... ..  
nogo ..... ..  
xyfa ..... ..  
buAPS ..... ..  
sime ..... ..  
agtu ..... ..  
brsu ..... ..  
melo ..... ..  
rhpa ..... ..  
mytu ..... ..  
rhru ..... ..  
noar ..... ..  
rico ..... ..  
ripr ..... ..  
plyo ..... ..  
plfa ..... ..  
clpel ..... ..  
clac ..... ..  
liin ..... ..  
limo ..... ..  
baan1 ..... ..  
bacel ..... ..  
basu ..... ..  
bast ..... ..  
baha ..... ..  
enfa ..... ..  
ocih ~~~~~~ ..  
stpy ..... ..  
stpn ..... ..  
stmu ..... ..  
lala ..... ..  
stau ..... ..  
oeoe ..... ..  
thma ..... ..  
thth ..... ..  
dera ..... ..  
stco ..... ..  
hepyj99 ..... ..  
hepy26695 ..... ..  
caje ..... ..  
aqae ..... ..  
funu ..... ..  
trer ..... ..  
sy6803 ..... ..  
arth\_1 ..... ..  
prma ..... ..  
caelmt ..... ..

hosamt ..... ..  
tarumt ..... ..  
drment ..... ..  
  anga2 ..... ..  
didimt ..... ..  
caabmt ..... ..  
sacemt ..... ..  
scpomt ..... ..  
  lema ..... ..  
  myge ..... ..  
  mypn ..... ..  
  urur ..... ..  
  mypu ..... ..
